# Supplementary material for: Mature B cells and mesenchymal stem cells control emergency myelopoiesis
Source: Life Sci Alliance. 2023 Jan 30;6(4):e202301924. doi: 10.26508/lsa.202301924 (PMC9889502; doi:10.26508/lsa.202301924)
Supplement: Supplementary file 1 [file LSA-2023-01924_TableS1.xlsx]

## Sheet: Control versus CFA+Hel-Ig
GeneID	baseMean	log2FoldChange	lfcSE	stat	pvalue	padj	Hel-Ig 1	Hel-Ig 2	Hel-Ig 3	CTR 1	CTR 2
Serpina3n	7344.3	6.20812	0.290944	21.3378	5.05736e-101	6.95589e-97	12341.5	16752.1	7300.1	150.237	177.579
Lrg1	570.105	3.48476	0.261042	13.3494	1.19342e-40	8.20715e-37	781.952	1106.76	801.244	84.133	76.436
Mgp	34489.5	2.58023	0.20592	12.5303	5.09854e-36	2.33751e-32	54522.2	61097.4	39531.1	9358.79	7937.76
Tifa	4032.59	1.95656	0.170906	11.4481	2.40319e-30	8.26337e-27	5048.61	6406.01	5752.76	1432.26	1523.32
Serpina3m	270.308	5.33955	0.483675	11.0396	2.46246e-28	6.77373e-25	381.682	644.793	303.843	5.00792	16.2137
Hp	178830	1.93083	0.188891	10.2219	1.58182e-24	3.62607e-21	237286	309149	214637	69492.8	63583.2
Ugcg	7165.04	1.87643	0.19298	9.72344	2.39546e-22	4.70674e-19	11640.1	8250.31	10430.8	2512.97	2991.04
Ldlr	561.658	-3.78842	0.399838	-9.47488	2.67062e-21	4.59146e-18	92.942	66.8872	115.91	634.002	1898.55
Saa3	554.964	2.36656	0.256146	9.23911	2.48561e-20	3.79856e-17	736.1	1030.06	690.961	153.242	164.453
Gbp6	797.416	-2.41769	0.267496	-9.03825	1.592e-19	2.18964e-16	198.276	325.518	348.856	1744.76	1369.67
Gbp10	275.258	-2.54968	0.283963	-8.9789	2.73477e-19	3.41945e-16	87.9851	109.695	82.1501	606.959	489.499
Ifitm1	2386.49	1.98135	0.225835	8.77347	1.7324e-18	1.98562e-15	3405.39	3429.08	3372.65	1083.71	641.599
Hpgd	3110.14	1.48486	0.169922	8.73851	2.36207e-18	2.49907e-15	3884.97	3990.04	4684.8	1421.25	1569.64
Thsd4	5476.84	-1.33773	0.160612	-8.32894	8.15724e-17	8.01391e-14	3219.51	3277.47	3702.38	8018.67	9166.14
Hspb1	980.149	1.6157	0.197898	8.16432	3.23262e-16	2.96409e-13	1225.59	1529.49	1269.39	454.719	421.556
Mmp13	84210	1.1654	0.14305	8.14676	3.73802e-16	3.2133e-13	100909	112902	110765	49194.8	47279.1
Bcl6	923.399	-1.68964	0.208715	-8.09543	5.70636e-16	4.61678e-13	441.165	450.374	573.925	1687.67	1463.87
Pi15	1576.41	-1.47599	0.183835	-8.0289	9.83515e-16	7.51514e-13	838.956	862.399	1060.07	2565.05	2555.59
Ptpn1	4674.54	1.45595	0.183566	7.93151	2.16489e-15	1.56715e-12	5895	5604.26	7303.48	2469.9	2100.06
Id3	15655	1.5376	0.198416	7.74938	9.23416e-15	6.35033e-12	19656.6	19723.7	24278.2	6022.52	8594.03
Thbs1	4282.55	-1.27927	0.165641	-7.72314	1.13498e-14	7.43359e-12	2562.72	3059.87	2554.53	6889.89	6345.73
Prg4	409.598	3.16757	0.412414	7.68057	1.58386e-14	9.90202e-12	468.428	1025.6	413.001	49.0776	91.8776
Timp1	1946.72	1.41104	0.185712	7.59801	3.00725e-14	1.79834e-11	2775.87	2479.29	2526.4	1102.74	849.289
Tgm1	242.328	2.40713	0.330846	7.27566	3.44718e-13	1.97552e-10	340.787	357.624	376.99	89.1409	47.0969
Cxcl9	3709.26	-2.07808	0.291694	-7.12417	1.04708e-12	5.76062e-10	1091.76	1372.53	2396.98	7877.45	5807.59
Kctd11	3568.42	1.06818	0.150064	7.11817	1.09372e-12	5.78577e-10	4424.04	4602.73	4510.38	2236.54	2068.4
Fgfr3	1771.84	-1.44042	0.203785	-7.06833	1.56804e-12	7.98769e-10	1013.69	1057.71	1082.58	2329.68	3375.54
Dusp5	133.259	2.60378	0.370938	7.01945	2.22748e-12	1.068e-09	180.927	232.767	186.807	31.0491	34.7436
Rgs16	1017.81	2.41673	0.344366	7.01793	2.25186e-12	1.068e-09	1453.61	2165.36	905.901	201.318	362.878
Cxcl10	2034.49	-2.12164	0.303798	-6.98372	2.87458e-12	1.3179e-09	693.967	733.976	1179.36	5031.95	2533.2
Isyna1	1883.58	1.20669	0.173542	6.95328	3.56886e-12	1.58342e-09	2295.05	2596.12	2414.99	1142.81	968.961
Slc12a2	837.599	-1.38419	0.199723	-6.93052	4.19309e-12	1.80224e-09	525.432	503.884	499.652	1175.86	1483.17
Rtn4rl2	303.323	2.6632	0.38563	6.9061	4.98156e-12	2.07625e-09	452.318	544.016	374.739	106.168	39.3761
Slc40a1	9792.83	-1.06602	0.154487	-6.9004	5.18573e-12	2.09778e-09	6129.21	7082.02	7225.83	13944	14583.1
Rsad2	275.449	-2.26373	0.336831	-6.72066	1.80906e-11	7.10909e-09	71.8751	145.368	109.158	599.948	450.895
Gulp1	2633.53	-1.07996	0.161423	-6.69024	2.22807e-11	8.51246e-09	1679.15	1813.09	1972.73	3880.13	3822.57
Cmpk2	451.395	-1.79089	0.268317	-6.67454	2.48001e-11	8.97634e-09	171.013	269.332	240.823	879.39	696.417
Ermp1	4582.69	-1.10273	0.16515	-6.67713	2.43663e-11	8.97634e-09	3143.92	2894.88	3385.03	6205.81	7283.81
Arid5a	2346.88	1.21541	0.182612	6.65571	2.81935e-11	9.94292e-09	2599.9	3113.38	3403.04	1361.15	1256.95
Srgn	1612.29	1.30084	0.198143	6.56516	5.19772e-11	1.78723e-08	2262.83	1928.14	2152.78	986.559	731.161
Ltbp2	16280.2	-1.20654	0.183974	-6.55819	5.4463e-11	1.82703e-08	11524.8	10171.3	10371.2	20624.6	28709.1
Cebpd	8063.14	1.43543	0.21916	6.54969	5.76586e-11	1.88818e-08	10159.2	8338.6	13846.2	3776.97	4194.72
Olfml2a	2723.39	-1.14452	0.174905	-6.54366	6.00323e-11	1.9202e-08	1873.71	1626.7	2005.36	3775.97	4335.23
Itga6	82.9233	-4.88764	0.748334	-6.53137	6.5172e-11	2.03722e-08	3.71768	0.891829	15.7548	278.44	115.812
Il7	3577.41	-1.23398	0.190227	-6.48691	8.76131e-11	2.67785e-08	1935.67	2314.3	2714.33	5779.13	5143.6
Tmem173	1933.57	1.08977	0.169882	6.41486	1.40954e-10	4.21452e-08	2437.56	2475.72	2447.62	1259.99	1046.94
Bhlhe40	716.076	1.85453	0.293021	6.32899	2.46771e-10	7.22148e-08	1117.78	634.091	1271.64	270.427	286.442
Hsd11b2	148.893	3.51174	0.55722	6.30225	2.9335e-10	8.4057e-08	261.477	357.624	84.4008	17.0269	23.9345
Col5a3	3847.91	-1.34772	0.217449	-6.19784	5.72416e-10	1.60674e-07	2648.23	1778.31	2709.83	5475.65	6627.54
Akr1c14	1993.15	-1.22112	0.197523	-6.18219	6.32189e-10	1.73902e-07	1241.7	1107.65	1552.97	3182.03	2881.41
Il1rn	67521.8	1.63731	0.26802	6.1089	1.00321e-09	2.70552e-07	78913.9	124743	74368.3	37644.5	21939.4
I830012O16Rik	559.904	-2.1654	0.358706	-6.0367	1.57295e-09	4.16046e-07	118.966	272.008	309.469	1266	833.075
Fabp4	540.953	2.13619	0.354443	6.0269	1.67138e-09	4.3374e-07	612.178	1214.67	521.034	206.326	150.556
D030025P21Rik	1061.67	-1.20836	0.202372	-5.97095	2.3588e-09	6.00795e-07	721.23	632.307	737.1	1400.21	1817.48
Pamr1	829.926	1.27491	0.214039	5.95643	2.57808e-09	6.44707e-07	977.75	1203.08	1071.33	506.801	390.673
Dclk3	456.353	-1.60991	0.270903	-5.94275	2.80272e-09	6.88369e-07	260.238	284.494	207.063	611.967	918.004
Lbp	22194.1	1.0263	0.17322	5.92484	3.12605e-09	7.54311e-07	26020	30520.2	27063.4	15406.4	11960.3
Tfr2	299.654	1.81152	0.306341	5.91341	3.3509e-09	7.94625e-07	463.471	498.533	297.091	117.185	121.989
Sc5d	1514.84	-1.08837	0.184409	-5.90194	3.59252e-09	8.37483e-07	936.855	1020.25	1175.98	2096.31	2344.81
Abcg1	48.044	5.87278	1.00664	5.83401	5.41104e-09	1.24019e-06	74.3536	104.344	58.5179	3.00475	0
Fblim1	1282.31	1.16874	0.200426	5.83128	5.50035e-09	1.24019e-06	1933.19	1600.83	1411.18	752.189	714.175
Errfi1	23035.9	1.14219	0.198235	5.7618	8.32234e-09	1.84622e-06	28768.6	25183.5	34507.5	15317.2	11402.9
Cst3	66814.4	1.14563	0.199282	5.74878	8.98897e-09	1.96245e-06	78627.7	104755	73331.9	42948.9	34408.6
Cyp51	395.84	-1.67938	0.292509	-5.74129	9.39577e-09	2.01921e-06	206.951	208.688	216.066	482.763	864.731
Pid1	1567.96	-1.05044	0.1831	-5.73697	9.63869e-09	2.03955e-06	986.424	1225.37	1080.33	2133.37	2414.3
Ifit3	1473.03	-1.89331	0.330305	-5.73201	9.92471e-09	2.06825e-06	406.466	754.488	956.542	3355.3	1892.37
Greb1	383.945	-1.92175	0.337708	-5.69057	1.26615e-08	2.59919e-06	140.033	130.207	274.584	737.165	637.739
Shisa4	1163.22	1.00346	0.176846	5.67423	1.39317e-08	2.81788e-06	1382.98	1572.3	1408.93	736.164	715.719
Crip1	1309.94	1.0599	0.188349	5.6273	1.8305e-08	3.6488e-06	1729.96	1529.49	1702.64	880.392	707.226
Ank3	618.426	-1.60373	0.286404	-5.59955	2.14914e-08	4.22276e-06	354.419	222.957	445.636	1010.6	1058.52
Stat5b	4827.26	-1.22607	0.219267	-5.59166	2.2491e-08	4.35691e-06	2852.7	2508.72	4069.24	7695.16	7010.49
Socs3	13754.1	1.20633	0.216263	5.57806	2.43222e-08	4.64622e-06	15222.7	19565.8	18568.2	5998.48	9415.53
Mt2	544.883	2.31673	0.41662	5.56076	2.68598e-08	5.06067e-06	560.13	1342.2	499.652	214.339	108.091
Apod	6177.41	0.97123	0.17482	5.55561	2.76637e-08	5.14171e-06	8052.49	8455.43	6540.5	4129.53	3709.08
Fkbp11	517.466	1.3767	0.248616	5.53747	3.06879e-08	5.62775e-06	680.335	568.987	810.247	234.37	293.391
Adh1	3703.24	-1.21167	0.21921	-5.52743	3.24956e-08	5.88085e-06	1933.19	2576.5	2767.22	6574.39	4664.91
Sbno2	1257.32	1.0204	0.184756	5.52294	3.33374e-08	5.95484e-06	1656.85	1431.39	1643	837.323	718.035
Npas2	850.259	-1.20345	0.218882	-5.49819	3.83716e-08	6.7662e-06	566.326	624.281	486.148	1113.76	1460.78
Arrdc4	15630.4	-0.80202	0.146489	-5.47496	4.37607e-08	7.52356e-06	12268.3	11658.9	12215.6	19698.1	22310.8
Bst2	5261.32	-1.54641	0.282426	-5.47543	4.36439e-08	7.52356e-06	2246.72	2791.43	3886.94	11346.9	6034.58
S100a6	2236.42	0.972939	0.178124	5.46215	4.70399e-08	7.98749e-06	3146.4	2633.57	2566.91	1503.38	1331.84
S100a11	16289.7	0.894578	0.164379	5.44217	5.26346e-08	8.82849e-06	19003.5	21048.1	19897.2	11980.9	9518.98
Tspan4	9832.69	0.964488	0.17796	5.41969	5.97016e-08	9.8932e-06	12031.6	11431.5	13180	7144.29	5376
Ncoa7	571.781	-1.17991	0.219327	-5.37967	7.46236e-08	1.22187e-05	373.007	396.864	369.113	750.186	969.734
Gadd45b	1822.54	1.03075	0.191685	5.37731	7.56054e-08	1.22338e-05	2049.68	2536.36	2283.32	1251.98	991.352
Zmiz1	1821.2	-1.00359	0.187561	-5.35077	8.75821e-08	1.4007e-05	1468.48	1211.1	1218.75	2351.72	2855.93
Efnb3	219.304	-2.02353	0.37857	-5.34519	9.03206e-08	1.4279e-05	111.53	54.4016	130.54	428.678	371.371
Gbp9	71.2412	-3.14508	0.589249	-5.33744	9.42683e-08	1.47337e-05	9.91381	12.4856	29.2589	200.317	104.231
Fabp5	179.559	1.72648	0.324614	5.31855	1.04595e-07	1.60169e-05	268.912	279.143	199.186	74.1171	76.436
Nme2	2880.17	1.07784	0.20267	5.31818	1.04808e-07	1.60169e-05	4498.39	3106.24	3340.02	1800.85	1655.34
Ifi44	1269.9	-1.36559	0.257606	-5.30107	1.15127e-07	1.74006e-05	568.805	954.257	811.373	2369.75	1645.3
Sorl1	105.893	-2.50443	0.473112	-5.29353	1.1998e-07	1.77876e-05	19.8276	56.1853	33.7603	187.296	232.396
Trim47	1496.75	1.19496	0.225758	5.29308	1.20274e-07	1.77876e-05	2014.98	1866.6	1913.08	1043.65	645.46
Jag1	743.83	1.53765	0.290849	5.28676	1.24499e-07	1.82166e-05	1193.37	969.419	863.138	235.372	457.844
Vim	9055.59	0.869522	0.164622	5.28192	1.27835e-07	1.85079e-05	12140.7	11124.7	9907.52	6454.2	5650.86
Fibin	3246.13	1.02821	0.195029	5.27207	1.34893e-07	1.93263e-05	3612.34	4708.86	3909.44	2253.56	1746.45
Gpr146	551.348	1.22099	0.232251	5.25718	1.46284e-07	2.05901e-05	638.202	748.245	756.231	351.556	262.507
Spsb1	4324.7	0.885368	0.168428	5.25664	1.46709e-07	2.05901e-05	5420.38	4668.73	5800.02	3002.75	2731.62
Col6a4	173.534	-2.37104	0.451347	-5.25326	1.49433e-07	2.07606e-05	28.5022	70.4545	95.6542	275.435	397.622
Mmp11	3491.45	1.25293	0.239317	5.23545	1.64587e-07	2.26372e-05	3899.85	6044.82	3696.75	1675.65	2140.21
Cds1	207.792	-1.48911	0.285519	-5.21546	1.83362e-07	2.49699e-05	110.291	128.423	122.662	362.573	315.009
Mt1	1184.79	1.79465	0.344265	5.213	1.85808e-07	2.50549e-05	1042.19	2550.63	1375.17	596.944	359.018
D4Wsu53e	3360.36	0.935308	0.179826	5.20119	1.98017e-07	2.64419e-05	3675.55	4107.77	4675.8	1990.15	2352.53
Tnfsf11	3358.77	0.881249	0.169661	5.19417	2.05637e-07	2.71955e-05	4077.05	4231.73	4020.85	2486.93	1977.3
Serpina3c	4141.4	1.50067	0.291194	5.1535	2.55668e-07	3.349e-05	3972.96	8530.35	4254.92	1939.06	2009.73
Ifit1	2097.03	-1.43557	0.278888	-5.14749	2.63992e-07	3.42542e-05	824.086	1400.17	1514.71	4126.52	2619.67
Adm	624.734	1.3407	0.26066	5.14349	2.69684e-07	3.43448e-05	717.512	972.986	780.988	396.627	255.559
Itga8	501.985	-1.19552	0.232371	-5.14489	2.67675e-07	3.43448e-05	293.697	372.785	326.35	677.07	840.024
Slc39a14	4530.45	0.928966	0.180908	5.13502	2.82117e-07	3.55985e-05	6233.31	5320.65	5224.97	2578.07	3295.24
Gpr18	582.717	1.24166	0.242193	5.12676	2.94775e-07	3.68576e-05	597.307	900.748	774.236	325.515	315.781
Eif4ebp1	2232.14	0.908374	0.177369	5.12138	3.03306e-07	3.7247e-05	2805.61	2715.62	2713.2	1644.6	1281.65
Tmem37	767.4	-1.17185	0.228758	-5.12267	3.01239e-07	3.7247e-05	536.585	478.021	518.783	1370.17	933.446
Has2	56.8404	3.05397	0.600682	5.08417	3.6924e-07	4.49427e-05	79.3105	123.964	59.6432	12.019	9.26497
Odz4	207.208	-1.87493	0.369136	-5.07923	3.78968e-07	4.57222e-05	83.0282	69.5627	148.545	383.606	351.297
Isg15	996.74	-1.5842	0.313379	-5.05522	4.29902e-07	5.14163e-05	408.945	591.283	660.577	2253.56	1069.33
Sftpa1	223.72	-1.62987	0.322767	-5.04968	4.42554e-07	5.24732e-05	85.5066	123.964	155.297	378.598	375.231
Nab1	1829.84	0.797282	0.158006	5.0459	4.51396e-07	5.30641e-05	2218.22	2239.38	2155.03	1247.97	1288.6
Acvr1b	137.732	2.26008	0.449088	5.03259	4.83897e-07	5.64027e-05	258.998	216.715	128.289	56.0887	28.567
Flnb	2051.44	-1.50746	0.300452	-5.01731	5.24004e-07	6.05643e-05	1542.84	676.007	1325.65	2851.51	3861.18
Tnfrsf1a	12701	0.82263	0.164069	5.01393	5.33282e-07	6.1123e-05	15103.7	16170.7	14844.4	9685.31	7700.73
Ces1g	493.062	-1.51407	0.302565	-5.0041	5.61229e-07	6.37945e-05	182.166	342.462	322.974	927.466	690.24
Serpina3g	31177.7	0.839486	0.168534	4.98111	6.32221e-07	7.12752e-05	33368.6	43015.6	37189.2	22371.4	19943.6
A4galt	800.744	1.33538	0.268388	4.97557	6.5056e-07	7.15824e-05	1011.21	1291.37	863.138	516.817	321.186
P2ry14	4694.29	0.874004	0.175657	4.97563	6.50369e-07	7.15824e-05	5062.24	5490.1	6658.66	3084.88	3175.57
St3gal2	1865.59	-0.831567	0.167053	-4.97786	6.42923e-07	7.15824e-05	1473.44	1316.34	1477.58	2410.81	2649.78
Mrps6	4391.62	0.917657	0.185159	4.95604	7.19452e-07	7.85345e-05	5509.6	5856.64	4862.61	3260.15	2469.11
Scd1	1246.67	1.65051	0.334402	4.9357	7.98633e-07	8.64914e-05	1654.37	2379.4	1108.46	364.576	726.528
Plp2	1192.95	1.10327	0.22481	4.90759	9.22025e-07	9.90745e-05	1716.33	1572.3	1262.64	821.298	592.186
Slc10a6	384.637	1.86172	0.380567	4.89196	9.98379e-07	0.000106447	397.792	859.724	366.862	175.277	123.533
Ptgr1	381.672	1.14014	0.233814	4.87628	1.08105e-06	0.000114375	537.824	472.67	454.639	229.363	213.866
Saa1	37.1241	3.76597	0.774511	4.86239	1.15979e-06	0.000121769	71.8751	71.3464	33.7603	4.00633	4.63249
Serpina3f	6668.05	1.33571	0.275297	4.85188	1.22295e-06	0.000127428	6146.56	12732.6	7493.66	3909.18	3058.21
Mx1	28.9338	-4.49757	0.928608	-4.84335	1.27671e-06	0.000131044	0	6.24281	2.25069	82.1298	54.0457
Stat2	1441.63	-0.919308	0.189805	-4.84342	1.27622e-06	0.000131044	923.224	1201.29	1062.32	2117.35	1903.95
Plekhf1	4351.87	0.87788	0.182671	4.80579	1.54144e-06	0.000157044	4730.13	5768.35	5466.92	3256.15	2537.83
Timp4	1190.71	1.26246	0.263732	4.78691	1.6937e-06	0.000171288	1439.98	2106.5	1111.84	659.042	636.195
Evi2a	87.2214	-2.26951	0.475016	-4.77776	1.7726e-06	0.000177959	38.416	35.6732	29.2589	222.351	110.408
Sod3	6827.45	1.05657	0.221933	4.76075	1.92872e-06	0.000192229	7358.53	10759	7732.23	4831.64	3455.83
Pdlim1	1806.18	0.923024	0.195483	4.72175	2.33825e-06	0.000231369	2379.31	2392.78	1908.58	1304.06	1046.17
Cish	1263.72	2.92527	0.621311	4.70822	2.49892e-06	0.00024376	909.592	3066.11	1833.18	216.342	293.391
Gpr171	1392.03	1.10376	0.234378	4.70931	2.48559e-06	0.00024376	1940.63	1287.8	2084.14	862.363	785.206
Flot1	1604.83	0.859836	0.183098	4.69604	2.6525e-06	0.000256919	1799.36	2141.28	1926.59	1174.86	982.087
Lmo7	2723.95	-0.813134	0.173782	-4.67905	2.88211e-06	0.000277207	1850.16	2085.99	2336.21	3515.56	3831.84
Tmem150a	1025.35	1.07825	0.23072	4.67339	2.96274e-06	0.000282983	1023.6	1451.9	1421.31	535.847	694.101
1300014I06Rik	2795.93	0.880932	0.189121	4.65803	3.1925e-06	0.000302825	2808.09	3865.19	3589.85	1906.01	1810.53
Adar	894.514	-0.903243	0.194538	-4.64302	3.43353e-06	0.000323458	748.493	634.091	608.811	1194.89	1286.29
Enpp1	2676.47	-0.802099	0.172857	-4.64024	3.4801e-06	0.000325615	2100.49	1870.17	2219.18	3301.22	3891.29
Aldh1a3	126.285	2.04517	0.442086	4.62617	3.72485e-06	0.00034616	152.425	197.986	192.434	63.0997	25.4787
Adcyap1r1	412.665	1.83488	0.39742	4.61699	3.89344e-06	0.000357002	638.202	830.293	270.082	140.222	184.527
Id2	342.712	1.27809	0.276757	4.61808	3.87299e-06	0.000357002	348.223	489.614	506.405	166.263	203.057
Vegfa	4535.99	0.79395	0.172022	4.61539	3.92366e-06	0.000357391	6116.82	4744.53	5520.93	3041.81	3255.86
Scara3	17552	0.652502	0.141682	4.60538	4.11707e-06	0.00037254	19402.6	21114.1	21106.9	13139.8	12996.4
Idi1	163.817	-2.14141	0.465509	-4.60014	4.2221e-06	0.000379548	83.0282	44.5915	81.0247	167.264	443.174
Arnt2	124.095	-1.75852	0.382388	-4.59878	4.24971e-06	0.000379549	53.2867	74.0218	63.0192	172.272	257.875
Tmem100	1897.13	1.00494	0.218599	4.59717	4.28258e-06	0.000380017	2186	2745.05	2187.67	1407.22	959.697
Sqle	299.726	-2.14233	0.4664	-4.59334	4.36209e-06	0.000384591	138.793	94.5339	147.42	225.356	892.525
Adamts9	510.408	-1.31275	0.286908	-4.57553	4.75017e-06	0.000416139	350.701	256.847	354.483	590.934	999.073
Ltbr	4863.17	0.740755	0.16196	4.57371	4.7917e-06	0.000417121	6115.58	5705.92	5559.2	3781.98	3153.18
Cygb	3481.08	0.876702	0.19181	4.57067	4.86156e-06	0.000417912	4557.87	4650.89	3559.46	2561.05	2076.13
Gbp4	96.7008	-3.21731	0.703894	-4.57073	4.86021e-06	0.000417912	8.67458	8.02646	50.6405	286.453	129.71
Abi3bp	5205.8	-1.05743	0.231894	-4.55995	5.11667e-06	0.00043711	2855.18	3774.22	4272.93	6011.5	9115.19
Avpr1a	435.959	1.33056	0.292308	4.5519	5.31638e-06	0.000451367	478.341	783.918	460.265	233.369	223.903
Arvcf	661.249	-1.01747	0.224437	-4.53341	5.8038e-06	0.000489727	447.361	405.782	554.794	878.388	1019.92
S1pr1	9064.29	-0.708307	0.156426	-4.52807	5.95242e-06	0.000499205	7703.03	6504.11	7486.91	11383	12244.4
Ifih1	719.38	-0.842644	0.186597	-4.51584	6.30658e-06	0.000525701	544.02	535.098	559.296	972.537	985.947
Pcdh9	319.168	-1.23531	0.273954	-4.50919	6.5076e-06	0.00053919	257.759	196.202	167.676	477.755	496.448
Stat1	3949.96	-0.981095	0.217801	-4.50456	6.65109e-06	0.000547779	2120.32	3109.81	3296.13	6131.69	5091.87
Samd9l	1757.19	-0.829462	0.18461	-4.49305	7.02111e-06	0.000574812	1172.31	1476.87	1371.79	2212.5	2552.5
Vcan	251.495	1.27849	0.284991	4.48606	7.25536e-06	0.000590475	371.768	346.922	267.832	131.207	139.747
Sc4mol	513.025	-1.25664	0.280686	-4.47703	7.56871e-06	0.000612353	296.175	307.681	385.993	583.923	991.352
Zcchc16	50.7352	-2.48664	0.556734	-4.46649	7.95144e-06	0.000639556	19.8276	22.2957	11.2534	99.1567	101.143
Crip2	2339.68	0.91367	0.204791	4.46147	8.14011e-06	0.000650925	2959.27	3058.97	2620.92	1813.87	1245.37
Srpx2	5982.55	0.842672	0.189823	4.43925	9.02733e-06	0.000717699	6325.01	8751.52	6729.55	3810.02	4296.63
Hrct1	713.144	1.18586	0.268603	4.41492	1.01049e-05	0.000798748	810.454	1185.24	760.732	475.752	333.539
Igfbp3	35555	2.50597	0.567931	4.41245	1.02206e-05	0.000803282	39882	84794.2	34425.4	10137	8536.13
Abca8a	2995.98	-1.12494	0.255358	-4.40535	1.05614e-05	0.00082535	1977.81	2069.04	2058.25	2980.71	5894.07
Rgs2	1011.03	1.27124	0.288996	4.3988	1.0885e-05	0.000845828	817.889	1576.75	1566.48	481.761	612.26
Stc1	272.989	-4.57064	1.04746	-4.36356	1.27963e-05	0.00098877	22.3061	20.5121	38.2617	1141.8	142.063
Fxyd5	269.504	1.20548	0.277614	4.34228	1.41011e-05	0.0010835	405.227	345.138	294.84	160.253	142.063
Bcl3	1949.74	1.23457	0.285221	4.32847	1.50148e-05	0.00114096	2606.09	1570.51	3419.92	1197.89	954.292
Itgb3	937.719	-0.821916	0.189841	-4.32951	1.49443e-05	0.00114096	732.383	639.442	780.988	1295.05	1240.73
Bmp6	14421.1	-0.693799	0.161614	-4.29295	1.76318e-05	0.00133246	10530.9	11256.7	12905.4	19711.2	17701.5
Pdlim2	3577.77	0.662936	0.154486	4.29124	1.77676e-05	0.00133538	4458.74	4215.68	3913.94	2686.25	2614.27
Nos1ap	328.666	1.34936	0.314887	4.28523	1.82548e-05	0.00136454	365.572	541.34	396.121	127.201	213.094
Slc52a3	757.443	0.999074	0.233668	4.27562	1.90607e-05	0.00141709	816.65	1147.78	874.392	526.833	421.556
Rspo3	2830.52	-0.839277	0.196735	-4.26604	1.98972e-05	0.00147133	1853.88	2118.09	2481.38	4309.81	3389.43
Mfsd10	2147.63	0.66686	0.156461	4.26216	2.02463e-05	0.00148913	2480.93	2522.09	2559.03	1646.6	1529.49
Gas7	177.83	1.60065	0.375959	4.2575	2.06725e-05	0.00151239	287.501	254.171	187.932	56.0887	103.459
Ptgir	143.246	1.57789	0.370773	4.25569	2.08408e-05	0.00151664	156.143	173.907	255.453	65.1029	65.6269
Tnfrsf19	9423.25	-0.748126	0.176073	-4.24896	2.14767e-05	0.00155469	6492.31	7989.01	7745.74	11117.6	13771.6
Ptgis	680.564	1.0938	0.257617	4.24583	2.1779e-05	0.00156015	776.995	939.096	877.768	302.478	506.485
Slco1a4	1994.88	-0.777246	0.183022	-4.24673	2.16909e-05	0.00156015	1340.84	1694.48	1619.37	2486.93	2832.76
Phex	3680.08	-1.02218	0.241317	-4.23583	2.2771e-05	0.00162276	2627.16	2516.74	2673.82	3708.86	6873.84
D030028A08Rik	33.6716	3.5501	0.838451	4.23411	2.29454e-05	0.00162676	26.0238	72.2382	60.7685	7.01108	2.31624
Des	1061.66	1.01889	0.241035	4.22713	2.36696e-05	0.00166931	1026.08	1515.22	1451.69	760.202	555.126
Tmem176a	49404.7	0.688758	0.162981	4.226	2.37883e-05	0.00166931	55068.7	62283.6	57394.8	40067.3	32208.9
Ddah1	32.1872	3.62617	0.858355	4.22456	2.39407e-05	0.00167147	32.2199	74.0218	46.1391	7.01108	1.54416
Ldb2	352.88	1.02226	0.242082	4.22279	2.41297e-05	0.00167616	430.012	490.506	407.374	230.364	206.146
Adra2c	426.966	-4.65528	1.10374	-4.21774	2.46762e-05	0.00170551	29.7414	11.5938	78.774	1578.49	436.226
Ifitm2	14388.8	0.726352	0.172473	4.2114	2.53792e-05	0.00174533	17802.7	17008.1	16468.3	11793.6	8871.21
Ctsl	27222	0.80261	0.190867	4.20506	2.61007e-05	0.00178602	29841.8	39628.4	29001.2	20562.5	17076.1
Kdelr3	4092.39	0.75063	0.17868	4.20098	2.65766e-05	0.00180958	5472.42	4527.82	4654.42	3213.08	2594.19
Col8a1	26577.4	-0.923611	0.220688	-4.18514	2.84988e-05	0.00191768	15335.4	20348.9	22995.3	43775.2	30432.3
Pim1	393.158	1.29015	0.30823	4.18566	2.84339e-05	0.00191768	707.598	410.242	427.63	183.29	237.029
Trim30a	774.001	-0.905763	0.216458	-4.18448	2.85826e-05	0.00191768	493.212	610.903	615.563	1199.9	950.432
Nog	262.986	1.38631	0.331464	4.18237	2.88481e-05	0.0019261	433.729	355.84	258.829	105.166	161.365
Plxnc1	279.149	-1.1263	0.269633	-4.17716	2.95168e-05	0.00196122	175.97	222.066	169.927	384.608	443.174
Cachd1	189.491	-1.33176	0.319157	-4.17275	3.00939e-05	0.00198996	147.468	113.262	93.4035	301.477	291.847
Klf10	2462.59	1.04118	0.250042	4.16402	3.12694e-05	0.00204843	3984.11	2264.35	3053.06	1275.02	1736.41
Lphn2	2616.82	-0.753801	0.181029	-4.16397	3.1276e-05	0.00204843	1964.17	1925.46	2270.94	3080.87	3842.65
Rassf2	370.594	-1.55223	0.373025	-4.16121	3.1657e-05	0.00206356	340.787	148.936	138.417	617.977	606.856
Cnnm1	1617.44	-0.734961	0.176712	-4.15909	3.19519e-05	0.00207296	1349.52	1124.6	1360.54	2102.32	2150.25
Wisp2	46849	0.992948	0.239181	4.15144	3.30388e-05	0.00213341	53337.5	60469.6	61659.8	38328.6	20449.3
Tmem176b	101866	0.779938	0.188421	4.13934	3.48301e-05	0.00223856	116585	137152	113143	82806.9	59640.9
Foxp1	2880.58	0.6189	0.150008	4.12579	3.6947e-05	0.00235263	3254.21	3380.03	3408.67	2190.46	2169.55
St8sia2	646.512	-0.907796	0.219985	-4.12664	3.6811e-05	0.00235263	496.93	436.105	504.154	776.227	1019.15
Irf7	3114.46	-1.03413	0.251155	-4.11749	3.83024e-05	0.0024277	1586.21	2589.87	2405.98	5418.56	3571.65
Cd83	521.06	-1.04153	0.253535	-4.10802	3.99064e-05	0.00251777	316.003	412.917	369.113	613.97	893.298
Plxna2	1583.65	-1.02611	0.251271	-4.08368	4.43286e-05	0.002784	1519.29	851.697	989.177	2138.38	2419.7
Cav1	170.126	-1.7315	0.425093	-4.07321	4.63693e-05	0.00288929	57.0044	94.5339	112.534	396.627	189.932
Fam174b	4136.88	-0.78878	0.193664	-4.07293	4.64252e-05	0.00288929	3230.66	2656.76	3726.01	6011.5	5059.45
Anxa1	10661.7	0.808254	0.198561	4.07056	4.69001e-05	0.00289267	11514.9	15922.7	11171.3	6801.75	7897.62
Dock4	320.024	-1.06453	0.261472	-4.07128	4.67556e-05	0.00289267	225.539	252.388	190.183	421.666	510.345
Capn5	556.673	-0.943863	0.232021	-4.068	4.74175e-05	0.00291152	491.973	368.326	360.11	749.184	813.773
Dbndd2	1935.49	0.793934	0.195535	4.06032	4.90053e-05	0.00299564	2560.24	2176.96	2251.81	1543.44	1145
A630033H20Rik	288.32	-1.05031	0.258995	-4.05535	5.00594e-05	0.00304654	200.755	211.364	193.559	369.584	466.337
Sun1	1521.3	-0.672316	0.166157	-4.04627	5.20404e-05	0.00315315	1242.94	1257.48	1187.24	2054.25	1864.58
Jup	2630.32	-0.811212	0.200782	-4.04027	5.33902e-05	0.00321027	2220.69	1752.44	2089.76	2999.74	4088.94
Map3k14	812.47	0.841498	0.208291	4.04001	5.34501e-05	0.00321027	1048.39	991.714	921.656	476.754	623.841
Slc2a3	1008.15	0.888749	0.220055	4.03876	5.3735e-05	0.00321335	1147.52	1382.34	1177.11	550.871	782.89
Col3a1	12911	-0.645803	0.160217	-4.03081	5.55844e-05	0.00329689	10744.1	9299.11	11555	16098.4	16858.4
Trim46	142.881	1.53016	0.379625	4.0307	5.56113e-05	0.00329689	252.802	173.907	154.172	57.0902	76.436
Nkd2	1721.07	0.689943	0.171259	4.02865	5.60983e-05	0.00331149	1902.21	2054.77	2132.53	1170.85	1344.96
Lgi2	24.69	-3.27437	0.813402	-4.02552	5.68498e-05	0.0033415	7.43536	2.67549	6.75206	54.0855	52.5015
Cldn1	8275.34	1.12479	0.27981	4.01985	5.82351e-05	0.00339392	8730.35	15299.3	7657.96	5702.01	3987.03
Klf9	3604.35	0.874056	0.217415	4.02023	5.81419e-05	0.00339392	3742.46	5646.17	3825.04	2579.08	2229
Cobl	323.511	-1.15002	0.286175	-4.01857	5.85519e-05	0.00339799	201.994	207.796	243.074	375.594	589.098
Dennd4a	378.919	-1.15575	0.287684	-4.01742	5.88398e-05	0.00340035	266.434	284.494	211.565	435.689	696.417
Adamts15	783.301	-1.15765	0.288951	-4.00638	6.16552e-05	0.00340564	382.921	740.218	450.137	1037.64	1305.59
Angptl4	21681.7	0.939634	0.234357	4.00941	6.087e-05	0.00340564	27131.6	31990.8	21325.3	10791.1	17169.5
Clock	674.445	-1.07823	0.269103	-4.00675	6.15594e-05	0.00340564	515.518	502.992	382.617	741.171	1229.92
Gm4841	155.367	-1.30043	0.324015	-4.01349	5.98288e-05	0.00340564	106.573	91.8584	95.6542	270.427	212.322
Lmcd1	1495.04	0.963568	0.240354	4.00895	6.09888e-05	0.00340564	1530.44	2170.71	1868.07	1157.83	748.146
Mrpl52	786.526	0.808699	0.201765	4.00813	6.1201e-05	0.00340564	1003.77	912.341	931.784	602.953	481.778
Prickle3	476.733	0.869129	0.216887	4.00728	6.14213e-05	0.00340564	602.264	557.393	586.304	343.543	294.163
Snx18	5201.1	-0.671657	0.167275	-4.01528	5.93745e-05	0.00340564	4507.07	3761.74	4344.95	6189.78	7201.97
Sphk1	3535.7	0.983036	0.244982	4.0127	6.00294e-05	0.00340564	4321.18	4211.22	4685.93	2910.6	1549.57
Stat5a	4199.3	-2.54659	0.6344	-4.01417	5.96543e-05	0.00340564	1044.67	900.748	2344.09	10013.8	6693.17
Wdr1	9012.61	-0.616576	0.153685	-4.01195	6.022e-05	0.00340564	7250.71	6906.33	8128.36	11094.5	11683.1
Serpine1	127.438	2.76592	0.690616	4.005	6.20179e-05	0.00341198	254.041	239.01	86.6514	52.0823	5.40457
Adra2b	215.561	-2.08226	0.520217	-4.00268	6.26299e-05	0.00342948	187.123	46.3751	49.5151	358.567	436.226
Dixdc1	310.783	-1.07843	0.26948	-4.0019	6.28348e-05	0.00342948	201.994	207.796	235.197	529.837	379.092
Mgea5	1132.63	-0.798954	0.200001	-3.99475	6.47625e-05	0.00350686	1014.93	865.966	741.601	1500.37	1540.3
Tgtp1	2004.56	-1.12444	0.281431	-3.99544	6.4574e-05	0.00350686	886.047	1726.58	1470.82	3580.66	2358.71
Col6a5	342.345	-1.57208	0.393776	-3.99233	6.54273e-05	0.00352897	146.229	143.585	284.712	363.575	773.625
Nr1d2	1712.19	0.785002	0.19689	3.98702	6.69096e-05	0.00359482	2164.93	1896.92	2110.02	1379.18	1009.88
Angptl1	3605.45	-1.16961	0.293767	-3.98142	6.85039e-05	0.00366616	1498.22	2127.01	3586.47	5220.25	5595.27
Ptbp2	131.908	-1.3324	0.335301	-3.97372	7.07575e-05	0.00377209	74.3536	88.2911	83.2754	211.334	202.285
Uck2	378.647	1.05084	0.265629	3.95604	7.62021e-05	0.00404665	557.652	495.857	379.241	210.332	250.154
Gm2694	143.729	1.37702	0.348452	3.95182	7.75584e-05	0.00409541	224.3	181.933	165.425	82.1298	64.8548
Ogn	15824.1	-0.623074	0.157687	-3.95134	7.77158e-05	0.00409541	11464.1	13788.6	13784.3	19760.2	20323.5
Tgtp2	3009.25	-1.08308	0.274355	-3.94772	7.88982e-05	0.00414185	1442.46	2556.87	2236.06	5518.72	3292.15
Gsr	5642.51	0.7544	0.19164	3.93656	8.26592e-05	0.0043228	6326.25	7983.66	5911.43	3592.68	4398.54
Ifi203	235.119	-1.12254	0.285768	-3.92815	8.5603e-05	0.00442625	152.425	182.825	144.044	309.489	386.813
Olfml3	16172.1	0.857087	0.218186	3.92824	8.55699e-05	0.00442625	18091.5	22251.1	18765.1	8293.11	13459.7
Runx1t1	1143.95	-0.725511	0.184653	-3.92905	8.5281e-05	0.00442625	860.023	851.697	1009.43	1431.26	1567.32
Rnd1	68.5656	1.90847	0.48602	3.92672	8.61107e-05	0.00443583	80.5497	85.6156	124.913	27.0427	24.7066
Jak3	502.744	0.840602	0.214157	3.92517	8.66691e-05	0.00444794	648.115	632.307	551.418	337.533	344.348
Kcnk2	1173.04	-0.991997	0.253456	-3.91388	9.08251e-05	0.0046439	641.919	750.029	1129.84	1561.47	1781.96
Glul	2256.49	1.24619	0.319583	3.89941	9.64271e-05	0.00491207	2468.54	4312.89	2024.49	1592.52	884.033
Usp18	1112.08	-1.03531	0.265641	-3.89739	9.72344e-05	0.00493491	556.413	826.726	965.545	1892.99	1318.71
Tmem194b	168.255	1.33701	0.343302	3.89456	9.8379e-05	0.00497465	236.692	181.041	247.576	104.165	71.8035
Steap1	175.207	1.19268	0.30656	3.89053	0.000100025	0.00503938	245.367	219.39	213.815	90.1425	107.319
Xbp1	13975.1	0.596359	0.153618	3.88209	0.000103564	0.00519859	15086.3	16204.5	17200.9	11386	9997.68
Eif4g3	1207.58	-0.722186	0.186224	-3.87804	0.000105302	0.00526176	913.31	997.957	964.419	1414.24	1747.99
Npdc1	3314.56	0.638655	0.164713	3.87738	0.000105587	0.00526176	3554.1	4090.82	3957.83	2659.2	2310.84
Nek6	2582.29	0.722788	0.186671	3.87198	0.000107955	0.00536036	3112.94	3387.17	2695.2	2059.25	1656.89
Frmd4b	690.303	-1.11616	0.288868	-3.86392	0.00011158	0.00552041	318.481	437.888	654.95	1032.63	1007.57
Slfn9	162.024	-1.39044	0.360842	-3.85332	0.000116528	0.00574456	68.1574	115.938	110.284	222.351	293.391
Foxc1	19563.2	-0.68956	0.17907	-3.85079	0.000117737	0.0057628	16048	13042.1	18047.1	24466.7	26212.1
Yeats2	654.071	-0.965311	0.250654	-3.85117	0.000117554	0.0057628	587.393	391.513	443.385	797.26	1050.8
Synpo2	394.98	1.27089	0.330777	3.84212	0.000121974	0.00594905	495.691	643.901	408.5	144.228	282.582
C1qtnf7	797.566	0.910762	0.237143	3.84056	0.000122753	0.00596109	856.305	1162.95	925.032	436.69	606.856
Gbp3	1218.21	-0.958964	0.249737	-3.83989	0.000123088	0.00596109	619.613	1015.79	1016.19	1903.01	1536.44
Adamdec1	1424.12	-0.819124	0.213461	-3.83735	0.000124372	0.00600213	1042.19	1171.86	1056.7	2295.63	1554.2
Rtp4	2509.11	-0.895084	0.233461	-3.83397	0.000126091	0.00603056	1397.85	2124.34	2077.38	4031.37	2914.61
Svil	308.625	-1.30054	0.339219	-3.83393	0.00012611	0.00603056	240.41	184.609	159.799	327.518	630.79
Timeless	495.466	0.94987	0.247774	3.83361	0.000126276	0.00603056	586.154	615.362	639.195	382.605	254.015
Otud7a	57.3575	2.07345	0.541329	3.83029	0.000127991	0.0060913	61.9613	82.9401	102.406	24.038	15.4416
Zfp37	250.121	-1.06105	0.27727	-3.82677	0.000129834	0.0061577	173.492	172.123	177.804	309.489	417.696
Itch	1889.22	-0.83703	0.219481	-3.81369	0.000136909	0.00647094	1387.93	1385.01	1539.47	1995.15	3138.51
Mmd2	156.575	-1.84002	0.48306	-3.8091	0.000139472	0.00656952	40.8945	65.1035	124.913	363.575	188.388
Ier5l	648.136	0.827071	0.217217	3.80759	0.00014033	0.00658737	874.894	772.324	707.841	488.773	396.85
Hsd17b7	614.185	-0.921402	0.242071	-3.80633	0.000141044	0.00659835	535.346	446.807	375.865	743.175	969.734
Arntl	447.761	-1.21787	0.320052	-3.80522	0.000141677	0.00660551	210.668	381.703	284.712	507.803	853.921
Fam134b	304.075	1.21741	0.320331	3.80049	0.000144409	0.00671015	361.854	512.802	307.219	136.215	202.285
Slc2a1	853.24	-0.818165	0.215383	-3.79865	0.000145485	0.00673738	676.618	532.422	752.855	1187.88	1116.43
Nrxn1	55.2694	-2.34217	0.616962	-3.7963	0.000146871	0.00677872	27.263	21.4039	14.6295	57.0902	155.96
Serpine2	225452	0.699755	0.184491	3.79289	0.000148907	0.0068497	219372	300187	279660	178394	149649
Dpyd	214.099	-1.09374	0.288749	-3.78787	0.000151947	0.00696624	147.468	165.88	128.289	291.461	337.399
Map3k6	221.846	1.13975	0.301136	3.78484	0.000153809	0.00702822	319.72	282.71	248.701	149.236	108.863
Rps2	6340.27	0.782703	0.206877	3.78342	0.000154689	0.00704501	8949.69	7034.75	6862.34	5197.21	3657.35
Colec11	401.7	-1.18164	0.31253	-3.78089	0.000156266	0.00709333	179.688	247.037	372.489	630.997	578.289
Uggt2	224.691	-1.27845	0.33867	-3.77492	0.000160061	0.0072417	147.468	170.339	111.409	263.416	430.821
Mccc1	927.389	-1.20547	0.319533	-3.77259	0.000161563	0.00728572	501.887	587.716	737.1	1957.09	853.149
Tnfsf10	63.2109	-2.11105	0.560229	-3.76818	0.000164441	0.00739124	27.263	20.5121	33.7603	164.26	70.2594
Hmgcs1	834.847	-0.885903	0.235468	-3.7623	0.000168356	0.00754257	629.527	618.038	623.44	893.412	1409.82
Ngfr	50.174	-3.09172	0.822428	-3.75926	0.000170417	0.00758548	12.3923	11.5938	13.5041	193.306	20.0741
Pycr1	172.245	1.25634	0.334162	3.75969	0.000170127	0.00758548	205.712	197.986	270.082	80.1266	107.319
Sulf2	188.573	-1.13733	0.302709	-3.75717	0.000171848	0.00762452	106.573	130.207	145.169	291.461	269.456
Igfbp5	159765	-0.968783	0.258393	-3.74926	0.000177359	0.00784372	141727	87245	117624	163823	288408
Gimap5	60.9401	2.19015	0.584377	3.74784	0.000178365	0.00786293	75.5928	137.342	52.8911	18.0285	20.8462
Gtf3c1	492.716	-1.11348	0.297299	-3.74534	0.000180152	0.00791633	416.38	295.196	298.216	528.836	924.953
Thrb	166.269	-1.76098	0.470401	-3.74357	0.000181421	0.00794671	69.3967	98.9931	86.6514	136.215	440.086
Pigz	349.261	1.27128	0.339692	3.74244	0.000182245	0.00795743	342.026	515.477	509.781	252.399	126.621
Gm12185	49.9512	-2.46423	0.65958	-3.73606	0.000186928	0.00813609	14.8707	31.214	6.75206	91.1441	105.775
Rpl38	932.66	0.691195	0.185785	3.72041	0.000198901	0.00862991	1185.94	1008.66	1106.21	693.095	669.394
Esyt1	4224.06	0.669354	0.180016	3.7183	0.00020057	0.00864779	5643.44	5059.35	4179.53	3040.81	3197.19
Trp53inp1	794.711	-0.98679	0.265369	-3.71856	0.000200359	0.00864779	598.546	664.413	449.012	873.38	1388.2
Tiparp	1003.69	-1.17115	0.315052	-3.71734	0.000201334	0.00865358	613.417	683.141	708.966	2137.38	875.54
Rpl10a	1707.7	0.866028	0.233883	3.70282	0.000213215	0.0091357	2572.63	1839.84	1838.81	1349.13	938.078
Cd302	22915.3	0.562338	0.151948	3.70085	0.000214881	0.0091785	24339.6	28947.9	25650	18046.5	17592.6
Cd9	9059.36	0.662889	0.179324	3.69659	0.000218512	0.00930469	10107.1	12526.6	9240.19	6959	6463.86
Cyfip2	605.271	-0.789737	0.213711	-3.69534	0.00021959	0.00931219	472.145	412.025	522.159	853.349	766.676
Serpina3i	56.7854	2.5525	0.690833	3.69482	0.000220042	0.00931219	43.3729	159.637	51.7658	16.0253	13.1254
Fads1	3037.93	-0.806955	0.218597	-3.69152	0.00022292	0.00940481	2251.67	2136.82	2624.3	3193.05	4983.78
Tiam2	370.53	-1.07882	0.292304	-3.69074	0.000223598	0.00940481	278.826	242.578	248.701	394.624	687.924
Coro1c	715.995	0.73496	0.199297	3.68777	0.000226232	0.00948657	804.258	902.531	849.634	470.744	552.81
Lpcat2	74.1214	2.06804	0.56108	3.68583	0.00022796	0.00952997	80.5497	111.479	127.164	39.0617	12.3533
Adamtsl1	216.39	-1.28628	0.349473	-3.68062	0.000232667	0.00969727	159.86	98.9931	154.172	257.407	411.519
Rnf19b	1253.54	0.738076	0.200711	3.67731	0.000235705	0.0097942	1348.28	1434.06	1694.77	994.572	796.015
Gpr81	607.009	-1.02111	0.277746	-3.6764	0.000236547	0.00979961	327.156	426.294	535.663	1045.65	700.277
Myc	1482.28	0.793182	0.216292	3.66719	0.000245234	0.010129	1541.6	1590.13	2220.3	1092.73	966.645
Il1r1	7526.74	0.768523	0.210378	3.65306	0.000259129	0.0106708	9656.05	10139.2	7253.96	4441.02	6143.45
Gabbr2	168.408	-1.51336	0.414407	-3.65187	0.000260341	0.0106722	92.942	129.315	67.5206	186.294	365.966
Slc25a30	77.0313	1.62743	0.445687	3.6515	0.000260713	0.0106722	112.77	111.479	92.2782	40.0633	28.567
Gpr50	1277.1	-0.999903	0.274015	-3.64908	0.000263184	0.0107414	867.458	787.485	1081.46	2386.77	1262.35
Trim8	3432.82	0.581387	0.159596	3.64288	0.000269608	0.010971	3690.42	3850.92	4332.57	2604.12	2686.07
Pik3cg	101.912	1.65598	0.455945	3.63196	0.000281274	0.0114119	199.515	116.83	104.657	36.057	52.5015
Parp14	664.556	-0.860426	0.237097	-3.629	0.00028452	0.0115097	493.212	596.634	413.001	809.279	1010.65
Cxcl5	52.5599	-1.90158	0.524218	-3.62746	0.000286228	0.0115384	23.5453	21.4039	30.3843	107.169	80.2964
Ppp1r2	5312.8	0.821786	0.226632	3.62609	0.000287746	0.0115384	6710.41	7980.98	4597.03	3690.83	3584.77
Shisa9	189.912	-1.5522	0.428046	-3.62625	0.000287571	0.0115384	141.272	51.7261	129.414	260.412	366.738
Serpina3h	428.179	0.971398	0.267972	3.625	0.000288962	0.0115534	467.188	683.141	446.761	277.439	266.368
Kng2	22792.6	0.602131	0.166185	3.62326	0.000290913	0.0115977	23028.5	29568.6	26587.4	18155.7	16622.9
Pappa	4959.87	-0.695702	0.192584	-3.61247	0.000303296	0.0120565	4763.59	3496.86	3665.24	5876.29	6997.37
Rap2b	392.26	0.889697	0.246518	3.60906	0.000307309	0.0121808	514.279	519.045	408.5	282.446	237.029
Cry1	406.293	-1.07154	0.297167	-3.60586	0.00031112	0.0122964	244.128	372.785	228.445	492.779	693.329
Snai1	410.572	1.53873	0.426818	3.60511	0.000312022	0.0122967	862.502	230.092	577.301	212.336	170.63
Megf10	176.652	-1.63831	0.454854	-3.60184	0.000315973	0.0124169	117.727	98.9931	70.8966	153.242	442.402
Oasl1	442.217	-1.20971	0.336218	-3.598	0.000320675	0.0125657	185.884	287.169	396.121	822.3	519.61
Col6a1	40011.7	-0.670075	0.186394	-3.59494	0.000324467	0.0126443	32715.6	26467.7	37897.1	54389	48589.4
Dhx58	346.891	-1.30465	0.363053	-3.59357	0.000326184	0.0126443	148.707	234.551	271.208	727.149	352.841
Ssbp4	1719.09	0.697083	0.193984	3.59351	0.000326259	0.0126443	2028.61	2064.59	1996.36	1454.3	1051.57
Wdfy2	259.073	-1.05059	0.292364	-3.59343	0.000326359	0.0126443	192.08	165.88	186.807	300.475	450.123
Tmsb10	6010.13	0.728606	0.202836	3.5921	0.000328027	0.0126733	8747.7	6003.8	6677.79	4725.47	3895.92
Slco2a1	745.798	-0.913156	0.254537	-3.58752	0.000333841	0.0128618	534.107	436.105	684.209	879.39	1195.18
Per3	155.364	1.49785	0.417626	3.58658	0.000335046	0.0128721	236.692	164.988	226.194	104.165	44.7807
Ankib1	740.091	-0.909981	0.253864	-3.58452	0.000337701	0.012938	632.005	453.941	558.17	813.285	1243.05
Mme	13055.6	-0.662084	0.184772	-3.58324	0.000339355	0.0129652	10673.5	9888.6	11206.2	13963.1	19546.8
Prtg	30.5435	-2.71772	0.75866	-3.58227	0.000340626	0.0129778	13.6315	7.13464	7.8774	36.057	88.0172
Gm5512	205.28	1.12512	0.314219	3.5807	0.000342677	0.0130198	261.477	307.681	217.191	104.165	135.886
Plod3	5019.73	0.590208	0.164951	3.57809	0.000346118	0.0131143	5187.4	5993.99	6213.02	4092.47	3611.79
Icosl	168.878	-1.35746	0.379733	-3.57478	0.000350519	0.0132095	74.3536	85.6156	151.921	258.408	274.089
Iigp1	10139	-0.787039	0.220165	-3.57476	0.000350551	0.0132095	5779.75	8492	9302.09	14981.7	12139.4
Cyb5b	3949.63	-0.63848	0.178793	-3.57105	0.000355555	0.0133615	3474.79	3008.14	3209.48	4380.92	5674.79
Krtcap2	3168.45	0.657772	0.184336	3.56834	0.000359256	0.0134638	4067.14	3194.53	3874.56	2575.07	2130.94
1190002H23Rik	2415.29	0.896698	0.251523	3.56507	0.000363763	0.0135426	2233.09	4084.58	2573.66	1645.6	1539.53
Col6a2	23320.8	-0.720302	0.202051	-3.56495	0.00036392	0.0135426	19391.4	14449.4	21729.3	33283.6	27750.1
Fxyd6	10.2523	6.73065	1.88816	3.56467	0.000364314	0.0135426	7.43536	30.3222	13.5041	0	0
Slc22a3	446.167	1.23457	0.346912	3.55874	0.000372631	0.0138145	550.216	728.625	460.265	151.239	340.488
Enpp3	2242.53	-0.710137	0.19967	-3.55655	0.000375756	0.0138299	1482.11	1737.28	2143.78	2797.42	3052.04
Gsta4	1138.8	-0.68083	0.191387	-3.55734	0.000374634	0.0138299	793.105	943.556	1015.06	1522.41	1419.86
Slfn5	1482.88	-0.6932	0.19492	-3.55634	0.000376063	0.0138299	1013.69	1330.61	1223.25	1773.8	2073.04
Gpx7	1697.53	0.740838	0.208743	3.54905	0.000386621	0.0141345	1959.22	1975.4	2131.4	1447.29	974.366
Skap2	1379.47	0.679182	0.191437	3.5478	0.000388457	0.0141345	1426.35	1771.17	1671.13	1103.74	924.953
Sp100	1307.91	-0.876298	0.246863	-3.54974	0.000385614	0.0141345	716.273	1023.82	1199.62	2040.22	1559.6
Susd2	4621.01	0.808795	0.227935	3.54836	0.000387643	0.0141345	3961.81	6878.68	5894.55	3189.04	3180.97
Plce1	392.075	-0.852062	0.240474	-3.54326	0.000395207	0.0143422	333.352	261.306	295.965	493.78	575.972
Zfp532	817.093	-0.820352	0.231787	-3.53925	0.000401267	0.0145238	712.555	530.638	634.694	927.466	1280.11
Trim30d	128.377	-1.41399	0.39975	-3.53719	0.000404413	0.0145992	63.2005	105.236	61.8939	239.378	172.174
Rgs20	352.548	0.903578	0.255745	3.53313	0.000410678	0.0147866	446.121	492.29	361.235	218.345	244.75
Enpep	1973.57	-0.557568	0.158051	-3.52778	0.000419062	0.015049	1687.83	1583.89	1709.4	2470.91	2415.84
Cpxm1	6606.01	-0.897424	0.254812	-3.52191	0.000428449	0.0151879	3248.01	4913.09	6572.01	8710.77	9586.16
Rpsa	5659.96	0.889266	0.25237	3.52366	0.000425628	0.0151879	9471.41	5482.08	5856.29	4326.84	3163.22
Scrn1	187.576	-1.10341	0.313283	-3.52208	0.000428181	0.0151879	146.229	102.56	137.292	295.467	256.331
Slc39a1	736.37	0.988592	0.280595	3.52319	0.000426379	0.0151879	1285.08	727.733	743.852	435.689	489.499
Tnc	63087.9	-0.940526	0.266922	-3.52359	0.000425737	0.0151879	49510.8	37513	51359.5	58195	118861
Cstad	64.7486	1.74882	0.497259	3.51692	0.000436586	0.0154323	65.679	108.803	95.6542	25.0396	28.567
Rnf150	273.46	1.07834	0.306669	3.51631	0.000437589	0.0154323	452.318	276.467	310.595	174.275	153.644
Anp32a	289.089	1.16457	0.331305	3.5151	0.00043959	0.0154632	520.475	276.467	317.347	178.282	152.872
Zfp280b	1148.92	-0.840644	0.239302	-3.5129	0.000443238	0.0155518	747.253	771.432	1099.46	1793.84	1332.61
Cdc42ep2	480.852	1.07398	0.305867	3.51125	0.000445998	0.0156088	776.995	416.484	632.443	340.538	237.801
Fam70a	241.686	-1.3717	0.390781	-3.51016	0.000447841	0.0156335	89.2243	121.289	232.946	366.579	398.394
Pcp4l1	72.7663	-2.10933	0.601206	-3.50851	0.000450633	0.0156911	12.3923	29.4304	51.7658	175.277	94.9659
Eif1a	1446.71	0.674668	0.192488	3.50498	0.000456635	0.01586	1601.08	1990.56	1510.21	1064.68	1067.02
Fam176b	1613.85	0.921731	0.263051	3.504	0.000458327	0.0158787	2033.57	1836.28	2097.64	1392.2	709.542
Sucnr1	106.236	-1.39031	0.397142	-3.50078	0.000463905	0.0160315	48.3298	74.9137	69.7713	148.234	189.932
Znrf1	1450.23	0.718136	0.205534	3.49399	0.000475852	0.0164032	1545.32	1848.76	1764.54	1213.92	878.628
Cd274	154.625	-1.34043	0.38384	-3.49215	0.000479142	0.0164753	59.4829	115.938	111.409	272.431	213.866
Mrap	287.011	1.23118	0.352962	3.48814	0.000486388	0.0166827	307.328	531.53	277.96	189.299	128.938
Magi2	650.951	-0.81194	0.233358	-3.47938	0.000502571	0.0171949	500.647	457.508	542.416	721.14	1033.04
Dhcr24	18.0616	-4.94808	1.42294	-3.47737	0.000506355	0.0172814	1.23923	1.78366	1.12534	2.00317	84.1568
Arhgef10l	1917.81	-0.631351	0.18209	-3.46725	0.00052581	0.0178881	1739.87	1500.06	1478.7	2197.47	2672.94
Zcchc5	23.8661	-4.35546	1.25634	-3.46678	0.000526732	0.0178881	6.19613	0	2.25069	103.163	7.72081
Ckb	3329.23	-0.761794	0.219858	-3.46493	0.000530366	0.0179323	2031.09	2444.5	3337.77	4499.11	4333.69
Rab20	217.406	1.02684	0.296364	3.46479	0.000530642	0.0179323	247.845	256.847	313.971	150.237	118.128
Ecscr	263.345	0.93402	0.269783	3.46211	0.000535957	0.0180675	325.917	321.059	329.726	146.231	193.792
Ehd1	2881.88	0.593609	0.171529	3.4607	0.000538781	0.0181183	3523.12	3534.32	2936.02	2326.68	2089.25
Pold4	578.597	0.79753	0.230615	3.45827	0.000543657	0.0182377	651.833	722.382	715.718	468.741	334.311
Coq10b	414.236	0.98921	0.286474	3.45306	0.000554269	0.0185484	373.007	564.528	612.187	294.465	226.992
Chid1	3439.62	0.586675	0.17005	3.45001	0.000560558	0.0187134	3930.83	3906.21	4072.62	2953.67	2334.77
Tnfaip2	2129.13	0.615184	0.178367	3.44898	0.000562715	0.0187399	2606.09	2591.66	2220.3	1470.32	1757.26
Phyhd1	139.501	1.39636	0.405163	3.44642	0.000568068	0.0188725	131.358	260.414	164.3	78.1235	63.3106
Tha1	345.487	0.88909	0.258239	3.44289	0.00057553	0.0190743	346.983	464.643	458.015	242.383	215.411
Naprt1	480.453	0.865911	0.251933	3.43707	0.000588054	0.0194425	560.13	562.744	636.944	256.405	386.04
Ip6k3	189.278	-1.19308	0.348219	-3.42625	0.000611984	0.0201852	159.86	123.964	91.1528	330.522	240.889
Ppapdc1b	1158.03	0.602568	0.175943	3.42479	0.00061528	0.0202454	1282.6	1447.44	1293.02	895.415	871.679
1810006K21Rik	1301.1	0.628899	0.183921	3.4194	0.000627603	0.0204551	1610.99	1411.77	1522.59	1070.69	889.437
Fbxw21	18.5765	5.03498	1.47228	3.41986	0.00062654	0.0204551	40.8945	45.4833	4.50137	2.00317	0
Igfbp4	279924	0.564821	0.165121	3.42065	0.00062472	0.0204551	323039	330101	311657	189218	245607
2022-09-06	610.142	-0.6861	0.20064	-3.41955	0.000627255	0.0204551	478.341	469.102	524.41	825.304	753.551
Trib1	528.705	0.952661	0.278895	3.41584	0.000635853	0.020675	560.13	884.695	521.034	322.51	355.157
C1qtnf1	1766.79	0.79344	0.232387	3.41431	0.000639442	0.0206938	2421.45	2154.66	1802.8	1495.36	959.697
Cdk5rap3	1533.74	0.655969	0.192109	3.41456	0.000638853	0.0206938	1499.46	1914.76	1973.85	1168.85	1111.8
Slc43a3	1593.5	0.581997	0.1705	3.41347	0.000641406	0.0207087	1899.73	1941.51	1671.13	1215.92	1239.19
Arsb	2283.03	-0.601451	0.176351	-3.41054	0.000648338	0.0207739	1821.66	1801.5	2052.63	2583.08	3156.27
Krt86	11.6131	-6.20865	1.82027	-3.41084	0.000647642	0.0207739	0	0.891829	0	54.0855	3.08832
Mafb	6869.24	0.789715	0.231574	3.4102	0.000649147	0.0207739	5987.94	10719.8	8078.84	4581.24	4978.38
Nfkbia	5459.98	0.667341	0.195697	3.41007	0.000649467	0.0207739	5999.09	6001.12	7226.96	4706.44	3366.27
Fam132a	689.455	0.767651	0.225235	3.40823	0.000653861	0.0208176	909.592	732.192	835.005	555.879	414.607
Tril	484.958	-0.749741	0.219976	-3.40828	0.000653743	0.0208176	407.705	387.054	348.856	590.934	690.24
Slc41a2	1613.48	0.770609	0.226305	3.40518	0.000661216	0.0210032	2225.65	2100.26	1475.33	1004.59	1261.58
Arhgef25	1402.48	0.581048	0.170709	3.40374	0.000664709	0.0210654	1692.78	1493.81	1664.38	1096.73	1064.7
Slfn8	663.309	-0.857884	0.252261	-3.40077	0.000671959	0.0212463	369.289	541.34	590.805	825.304	989.808
Comp	1798.2	0.776746	0.22871	3.39621	0.000683256	0.0214555	1583.73	2440.94	2447.62	1159.83	1358.86
Ctps	870.79	0.924286	0.272141	3.39635	0.000682917	0.0214555	1008.73	1170.97	1040.94	744.176	389.129
Paqr4	776.899	0.695455	0.204719	3.39713	0.000680975	0.0214555	868.698	982.796	899.149	631.999	501.853
Rab23	1519.72	0.561825	0.165537	3.39395	0.000688926	0.0215842	1784.49	1760.47	1689.14	1234.95	1129.55
Sctr	17.2283	4.37235	1.28948	3.39079	0.000696915	0.0217849	34.6983	41.916	6.75206	2.00317	0.772081
Tap1	3247.31	-0.629219	0.185684	-3.38866	0.000702344	0.0219049	2410.3	2613.95	2968.66	4630.32	3613.34
Pawr	2717.09	-0.533433	0.157498	-3.38691	0.000706833	0.021995	2155.01	2453.42	2304.7	3386.35	3285.98
Chchd10	43.6165	2.21434	0.654027	3.3857	0.000709979	0.022043	70.6359	75.8055	43.8884	20.0317	7.72081
Nupr1	4242.35	0.772677	0.228289	3.38464	0.000712707	0.0220779	4139.02	6754.72	4362.96	3099.9	2855.16
B3gnt3	43.814	1.93865	0.573028	3.38317	0.000716538	0.0221467	61.9613	52.6179	72.022	17.0269	15.4416
Cbln2	1041.97	-1.11519	0.329724	-3.38219	0.000719095	0.0221759	586.154	453.049	1092.71	1797.84	1280.11
Rap2a	651.871	0.897264	0.265501	3.37951	0.000726154	0.0223435	1016.17	804.43	579.552	457.723	401.482
Plxdc1	89.0946	-2.01853	0.597809	-3.37654	0.000734028	0.0225353	16.1099	74.0218	29.2589	203.321	122.761
Lepr	125329	-0.549835	0.162894	-3.37541	0.000737054	0.0225778	107767	104550	104820	135379	174127
0610040F04Rik	33.8391	2.62912	0.779552	3.37261	0.000744599	0.0227078	65.679	24.9712	61.8939	12.019	4.63249
Nr1d1	3299.44	0.887962	0.263251	3.37306	0.000743366	0.0227078	3935.78	3154.4	5037.04	2776.39	1593.57
Rps19	3393.63	0.719663	0.213517	3.37052	0.000750262	0.0228299	4749.95	3572.67	3755.27	2880.55	2009.73
Fam55b	169.957	1.38925	0.412291	3.36959	0.000752807	0.0228567	242.888	237.227	198.06	48.076	123.533
Osmr	3677.97	0.746209	0.221644	3.3667	0.000760737	0.0230042	5652.11	3943.67	3563.96	2820.46	2409.66
Serpina3k	8.27983	6.41484	1.90547	3.36654	0.000761185	0.0230042	16.1099	15.1611	10.1281	0	0
Timp3	5118.26	-0.701288	0.208345	-3.36599	0.000762681	0.0230042	3174.9	4118.47	4986.4	6287.94	7023.62
Ido2	16.1898	-4.01781	1.19402	-3.36494	0.000765607	0.0230419	0	5.35098	1.12534	52.0823	22.3903
Mycbp2	1173.55	0.730835	0.217281	3.36355	0.000769468	0.0231076	1473.44	1591.02	1121.97	760.202	921.092
Igf1r	643.33	1.09504	0.32594	3.35965	0.000780427	0.0233856	1247.9	622.497	581.803	357.565	406.887
Wdr6	636.354	-0.667717	0.198941	-3.35636	0.000789764	0.0236139	472.145	522.612	550.293	808.278	828.443
Ptger3	91.9747	1.74616	0.521761	3.34666	0.000817923	0.0243838	68.1574	187.284	128.289	29.0459	47.0969
Ptpn13	772.323	-0.878201	0.262442	-3.34627	0.000819056	0.0243838	702.641	455.725	578.427	849.342	1275.48
Tob1	471.17	-0.744434	0.22282	-3.34097	0.000834866	0.0248007	364.333	345.138	403.998	569.901	672.482
Gas1	4106.8	-0.711506	0.213463	-3.33316	0.000858643	0.0254521	2959.27	3078.6	3780.03	4297.79	6418.31
Cdh11	37140.1	-0.465337	0.139694	-3.33111	0.000865003	0.0255855	33386	32609.7	30701.6	45123.3	43879.7
Krt83	44.7139	-2.66437	0.801927	-3.32246	0.000892265	0.0263352	3.71768	15.1611	23.6322	143.226	37.832
Vamp5	527.385	0.816437	0.245846	3.32093	0.000897192	0.0264239	646.876	750.92	514.282	393.622	331.223
Irgm1	2505.11	-0.678377	0.204367	-3.3194	0.000902104	0.0265118	1839.01	2059.23	2160.66	3833.06	2633.57
Syngr2	2286.85	0.733138	0.221102	3.31584	0.000913696	0.0267953	2578.83	3171.35	2409.36	1959.1	1315.63
Cdr2	241.743	0.917515	0.27723	3.30958	0.00093435	0.0273427	302.371	280.034	310.595	178.282	137.43
Il6	36.8689	2.46511	0.745899	3.30488	0.000950165	0.0277464	24.7845	50.8343	88.9021	9.01425	10.8091
Dusp23	297.71	1.0021	0.303298	3.30402	0.000953088	0.0277728	394.074	444.131	277.96	213.337	159.049
Fn1	525.744	-1.18358	0.358368	-3.30269	0.000957627	0.0278461	431.251	236.335	379.241	484.766	1097.13
Gm15441	2922.7	1.06156	0.32158	3.30109	0.000963109	0.0279464	3520.64	4544.76	3011.42	989.564	2547.09
Rpl3	5229.88	0.653387	0.198015	3.29967	0.00096797	0.0280283	7563	5504.37	5298.12	4079.45	3704.44
Ptgfr	7610.33	0.512403	0.155678	3.29143	0.000996779	0.0288019	9481.32	8062.14	8389.44	5850.25	6268.52
Ncoa1	1152.78	-0.757	0.230131	-3.28942	0.00100392	0.0289475	1013.69	935.529	761.857	1239.96	1812.85
Chst3	115.369	-1.85434	0.564014	-3.28776	0.00100989	0.028998	79.3105	74.0218	15.7548	172.272	235.485
Igsf3	9228.1	0.614878	0.186991	3.28828	0.00100802	0.028998	12912.7	9875.23	9359.48	6630.48	7362.56
Phka1	175.352	-1.00068	0.305036	-3.28053	0.00103614	0.0296896	136.315	107.02	132.791	247.391	253.243
Atp1b1	129.43	-1.1854	0.361418	-3.27986	0.0010386	0.0296984	87.9851	102.56	66.3953	183.29	206.918
Trp53i13	1955.88	0.578284	0.176366	3.27888	0.0010422	0.0297395	2155.01	2399.91	2204.55	1662.63	1357.32
Vps28	1803.82	0.611684	0.186717	3.27599	0.0010529	0.0299827	1930.71	2186.77	2160.66	1543.44	1197.5
Tmem45a	922.651	-0.633083	0.193332	-3.27458	0.00105818	0.0300707	846.392	674.223	748.353	1193.89	1150.4
Gbp8	32.7197	-2.14331	0.65498	-3.27232	0.00106669	0.0301876	16.1099	9.81012	15.7548	67.1061	54.8177
Plod2	2820.56	-1.00095	0.305869	-3.27248	0.00106608	0.0301876	1716.33	1904.06	2420.61	5689.99	2371.83
Mfap3l	21.9073	-3.05208	0.933232	-3.27044	0.0010738	0.0303265	7.43536	1.78366	7.8774	26.0412	66.399
Vldlr	464.773	-1.23796	0.379357	-3.26332	0.00110115	0.0310353	166.056	256.847	480.522	598.947	821.494
Rab4b	1113.28	0.660093	0.202603	3.25807	0.00112175	0.0315511	1224.36	1268.18	1421.31	941.488	711.086
Lum	4970.49	-0.529385	0.162658	-3.25458	0.00113559	0.0318753	3858.95	4303.08	4502.5	6529.32	5658.58
Barx2	61.9902	1.75536	0.540257	3.24911	0.00115765	0.0324285	99.1381	74.9137	84.4008	36.057	15.4416
Ecm2	1708.11	-0.70637	0.217491	-3.24781	0.00116298	0.0324455	1065.73	1615.1	1408.93	2027.2	2423.56
Gm2115	101.261	-2.15107	0.662225	-3.24825	0.00116119	0.0324455	65.679	8.91829	54.0165	115.182	262.507
Pla2r1	832.56	-0.792032	0.244184	-3.24359	0.00118033	0.0328628	661.747	654.603	616.688	842.331	1387.43
Apol6	205.135	-1.68181	0.51865	-3.24266	0.00118419	0.0329036	33.4591	106.128	186.807	396.627	302.656
Cyp2j9	309.032	0.884394	0.272846	3.24136	0.0011896	0.0329874	361.854	374.568	399.497	165.261	243.978
Gbp11	9.63255	-5.01834	1.54897	-3.2398	0.00119615	0.0331024	1.23923	0.891829	0	29.0459	16.9858
Ptger4	670.999	0.892367	0.27589	3.2345	0.00121856	0.0336547	608.46	1088.92	770.86	392.621	494.132
Kctd12	3709.54	-0.673023	0.208241	-3.23194	0.00122953	0.0338897	3747.42	2475.72	2769.47	4484.09	5071.03
Ptn	1474.31	-0.987195	0.305576	-3.23061	0.00123528	0.0339802	796.823	919.476	1458.45	2728.31	1468.5
D14Ertd668e	1050.54	-0.890698	0.275874	-3.22864	0.00124382	0.0341468	540.303	880.236	927.283	1746.76	1158.12
Sned1	2114.76	-0.896754	0.277961	-3.22618	0.00125453	0.034372	2037.29	1046.12	1636.25	2342.7	3511.42
Amotl1	1244.59	-0.752501	0.233735	-3.21946	0.00128431	0.0350412	1202.05	774.108	956.542	1437.27	1852.99
Loxl2	2892.88	0.64847	0.201416	3.21956	0.00128388	0.0350412	4042.36	2758.43	3347.9	2293.63	2022.08
Zbtb8a	1201.9	0.649142	0.201662	3.21895	0.00128659	0.0350412	1174.79	1524.14	1516.96	960.518	833.075
Rpl21	2243.76	0.629119	0.195563	3.21697	0.00129553	0.0352149	3055.93	2399.91	2383.48	1866.95	1512.51
Foxq1	13.9458	5.73718	1.78454	3.21494	0.00130473	0.0353253	22.3061	41.0242	5.62672	0	0.772081
Slc7a5	65.7274	-1.8172	0.565228	-3.21498	0.00130452	0.0353253	50.8083	19.6202	28.1336	148.234	81.8406
Ypel3	2499.9	0.617611	0.19231	3.21154	0.00132027	0.0356759	2887.4	3124.97	2699.7	2188.46	1598.98
Apcdd1	275.726	1.08885	0.339279	3.20929	0.00133061	0.0358847	487.016	325.518	237.447	157.249	171.402
Fndc1	1123.61	0.860528	0.268315	3.20715	0.00134057	0.0360826	1568.86	1442.09	1099.46	544.861	962.785
Gprasp2	34.4661	-2.26705	0.708026	-3.20193	0.00136511	0.0366713	16.1099	16.9448	7.8774	41.0649	90.3335
Herc6	550.862	-0.696445	0.217673	-3.19949	0.0013767	0.0369105	390.356	432.537	500.778	741.171	689.468
Abcc9	949.774	-1.06734	0.333796	-3.19757	0.0013859	0.0370131	964.118	494.073	524.41	956.512	1809.76
Fam107b	1971.35	0.679127	0.212372	3.19781	0.00138475	0.0370131	2551.57	2321.43	2087.51	1169.85	1726.37
Glce	743.14	-0.609309	0.190782	-3.19374	0.00140442	0.0374349	640.68	614.47	587.429	886.401	986.719
Tdrd7	688.174	-0.623184	0.19521	-3.19238	0.00141104	0.0375387	547.738	569.879	579.552	931.472	812.229
Sh3bp4	981.32	-0.686635	0.215162	-3.19125	0.00141661	0.0376139	934.377	643.901	789.991	1221.93	1316.4
Oas1g	179.285	-1.14353	0.358649	-3.18843	0.00143046	0.0379085	100.377	149.827	111.409	332.526	202.285
Rarres2	17669	0.622744	0.195456	3.1861	0.00144205	0.0381422	20105.2	22246.7	19298.5	15926.2	10768.2
Dhx38	353.006	-0.84299	0.264671	-3.18506	0.00144726	0.0382067	283.783	219.39	301.592	423.67	536.596
Wdfy3	991.562	-0.787813	0.247918	-3.17772	0.00148439	0.0391116	914.549	772.324	618.939	1067.69	1584.31
Mob3a	1324.57	0.594135	0.187083	3.17579	0.0014943	0.0391967	1454.85	1394.82	1744.28	1050.66	978.226
Rnf125	1199.15	0.64818	0.204124	3.17543	0.00149617	0.0391967	1225.59	1564.27	1416.81	789.247	999.845
Rpl11	1773.52	0.67069	0.211207	3.17551	0.00149572	0.0391967	2340.9	1998.59	1909.71	1544.44	1073.96
Cav2	863.819	-0.820594	0.258473	-3.17478	0.00149949	0.0392092	509.322	800.863	671.83	1388.19	948.887
Txndc5	12744.6	0.457861	0.144252	3.17404	0.00150334	0.0392352	13406	14527	14967.1	10415.5	10407.7
Arhgap21	405.489	-1.1177	0.352364	-3.172	0.00151393	0.0394239	416.38	217.606	195.81	475.752	721.896
Rev3l	152.945	-1.16815	0.368322	-3.17155	0.0015163	0.0394239	131.358	74.0218	101.281	260.412	197.653
Chst11	459.336	1.03078	0.325149	3.17019	0.00152339	0.0395333	857.545	450.374	424.254	273.432	291.074
Adnp2	581.497	-0.793647	0.250581	-3.16723	0.00153898	0.0397132	500.647	503.884	344.355	693.095	865.503
Ism1	5519.99	0.53488	0.168857	3.16765	0.00153676	0.0397132	5950.76	7040.1	5911.43	4010.34	4687.3
Vkorc1	3075.37	0.509697	0.160877	3.16823	0.00153368	0.0397132	3545.43	3320.28	3606.73	2632.16	2272.23
Il31ra	253.951	-2.81696	0.890707	-3.16261	0.00156359	0.0402727	54.526	44.5915	123.788	845.336	201.513
Fam78b	379.604	-0.994281	0.31451	-3.16136	0.00157033	0.0403706	228.018	201.553	385.993	582.921	499.536
Pcdh18	2402.78	-0.599143	0.189773	-3.15715	0.00159321	0.0408824	1851.4	1855.9	2270.94	2673.23	3362.41
Gmpr	268.35	1.04133	0.330552	3.15028	0.00163114	0.0417779	316.003	241.686	455.764	179.283	149.012
Oxct1	2046.2	-0.550236	0.174741	-3.14886	0.00163907	0.0419029	1506.9	1797.93	1871.45	2567.06	2487.64
Rps28	622.528	0.81627	0.259589	3.14447	0.00166388	0.0424584	935.616	624.281	697.713	496.785	358.246
Sema4d	152.847	-1.10902	0.352928	-3.14233	0.0016761	0.0426908	114.009	124.856	74.2727	233.369	217.727
C030046E11Rik	165.37	-1.09988	0.35022	-3.14055	0.00168629	0.042792	147.468	107.911	85.5261	220.348	265.596
Porcn	1866.6	0.529646	0.168637	3.14075	0.00168518	0.042792	1962.93	2323.22	2097.64	1495.36	1453.83
Slc50a1	3264.57	0.483303	0.15396	3.13915	0.00169437	0.0429178	3573.93	3784.03	3693.38	2775.39	2496.14
Rps4x	3344.82	0.615884	0.196231	3.13856	0.00169779	0.0429254	4596.29	3538.78	3518.95	2819.46	2250.62
Sncaip	213.884	-0.925802	0.295226	-3.13591	0.0017132	0.0432356	148.707	136.45	186.807	319.505	277.949
Camk2g	174.687	1.13988	0.364012	3.13145	0.00173947	0.043818	306.089	201.553	163.175	99.1567	103.459
1190002N15Rik	2909.66	-0.563049	0.18023	-3.12405	0.00178381	0.044853	2365.68	2261.68	2703.07	3213.08	4004.78
Ireb2	558.612	-0.755183	0.242157	-3.11857	0.00181732	0.0455289	401.509	480.696	432.132	603.955	874.768
Nkd1	586.301	0.812619	0.260538	3.119	0.00181465	0.0455289	562.609	824.05	737.1	475.752	331.995
Junb	5411.17	0.830769	0.26656	3.11663	0.00182928	0.0455796	4251.79	6938.43	8489.59	3124.94	4251.08
Rplp1	2805.19	0.824551	0.264498	3.11742	0.0018244	0.0455796	4696.67	2654.08	2839.24	2238.54	1597.44
Trak1	533.923	-0.693628	0.222537	-3.11691	0.00182758	0.0455796	470.906	404.891	409.625	615.974	768.22
Abhd14a	506.707	0.675818	0.216927	3.11542	0.00183685	0.0456166	658.029	588.607	541.29	359.568	386.04
Rpl41	2945.03	0.650234	0.208721	3.11533	0.0018374	0.0456166	4060.94	3065.22	3208.35	2543.02	1847.59
Moxd1	434.494	-1.05848	0.340255	-3.11084	0.00186554	0.0462317	303.61	175.69	431.007	673.064	589.098
Abca9	1852.27	-0.809968	0.261088	-3.10228	0.00192037	0.0469142	1923.28	1225.37	1123.09	2067.27	2922.33
Ckap4	7668.34	0.461288	0.14852	3.10591	0.00189695	0.0469142	8678.3	8032.71	9122.03	6359.05	6149.62
Ckap5	712.712	-0.771329	0.248601	-3.10268	0.00191776	0.0469142	570.044	548.475	549.168	716.132	1179.74
Dkk3	4201.27	-0.701091	0.225983	-3.1024	0.0019196	0.0469142	3027.43	3116.05	3936.45	6701.59	4224.83
H2afj	667.098	0.671541	0.216414	3.10304	0.00191545	0.0469142	753.45	764.298	832.754	561.888	423.1
Hecw2	68.6185	-1.48963	0.479734	-3.10512	0.00190199	0.0469142	42.1337	49.0506	28.1336	97.1536	126.621
Hnrnpr	1725.58	-0.496777	0.160029	-3.1043	0.00190731	0.0469142	1461.05	1502.73	1482.08	2020.19	2161.83
Tasp1	387.109	0.928159	0.298947	3.10476	0.00190434	0.0469142	478.341	616.254	338.728	227.359	274.861
Stard13	882.472	-0.691914	0.223363	-3.09771	0.00195023	0.0474752	845.152	614.47	666.203	1012.6	1273.93
Tgfb2	563.6	-1.09725	0.354202	-3.09781	0.00194956	0.0474752	403.988	247.929	509.781	1112.76	543.545
Pld1	728.764	0.645843	0.208611	3.09592	0.001962	0.0475932	831.521	971.202	751.729	565.894	523.471
Slc23a2	1667.9	-0.598926	0.193433	-3.0963	0.00195949	0.0475932	1311.1	1297.61	1541.72	1831.9	2357.16
Negr1	1453.38	-0.648816	0.209661	-3.0946	0.00197079	0.0477222	1107.87	1088.92	1357.16	1573.49	2139.44
Dyrk3	7.491	6.26455	2.02579	3.09239	0.00198551	0.0479943	13.6315	3.56732	20.2562	0	0
Atp5e	1567.63	0.550164	0.178027	3.09034	0.00199929	0.0482426	1914.6	1652.56	1818.55	1322.09	1130.33
Igtp	2083.39	-0.732192	0.237351	-3.08485	0.00203654	0.0489723	1344.56	1665.05	1932.21	3330.26	2144.84
Mxra7	1021.1	0.558813	0.181149	3.08483	0.00203665	0.0489723	1123.98	1234.29	1155.73	843.333	748.146
Fam26e	2351.59	0.526193	0.170653	3.08342	0.00204639	0.0491204	2469.78	2804.8	2761.59	2013.18	1708.61
Efhd1	59.8401	-1.74293	0.565992	-3.07943	0.00207398	0.049696	30.9807	22.2957	39.387	143.226	63.3106
Mras	1134.42	0.571891	0.185824	3.07759	0.00208683	0.0498303	1374.3	1147.78	1394.3	879.39	876.312
Rpl14	3313.39	0.617506	0.200623	3.07794	0.00208438	0.0498303	4737.56	3430.87	3380.53	2656.2	2361.8
Gdpd2	51118.6	-0.667854	0.217244	-3.07421	0.0021106	0.0503105	31850.6	43040.6	49233.8	75566.4	55901.7
Foxc2	518.175	0.944763	0.307438	3.07301	0.00211909	0.0503516	768.32	392.405	764.108	342.541	323.502
Gxylt2	623.867	0.678062	0.220695	3.07239	0.00212351	0.0503516	765.842	742.002	693.212	526.833	391.445
Hsd11b1	831.689	0.745785	0.242776	3.07191	0.00212696	0.0503516	893.482	1233.4	847.384	673.064	511.118
Slc22a23	92.9349	-1.39975	0.455592	-3.07237	0.00212365	0.0503516	81.7889	49.9424	37.1363	135.214	160.593
Col5a1	9544.68	-0.492331	0.160422	-3.06897	0.00214797	0.0507615	8047.54	7397.72	9182.8	11692.5	11402.9
2900053A13Rik	212.207	0.862489	0.281193	3.06725	0.00216038	0.0508799	256.52	250.604	268.957	155.245	129.71
Tmem20	421.23	-0.853353	0.278196	-3.06746	0.00215888	0.0508799	314.763	274.683	366.862	445.704	704.138
Epha4	17.6462	3.54949	1.15811	3.06489	0.0021775	0.0509357	32.2199	32.9977	18.0055	5.00792	0
Rpl12	1333.77	0.749716	0.244518	3.0661	0.00216874	0.0509357	2105.45	1302.96	1367.29	1027.62	865.503
Rpl19	4023.51	0.489377	0.159632	3.06565	0.00217194	0.0509357	4939.56	4361.05	4339.32	3409.39	3068.25
Tprg	26.21	-3.13702	1.02354	-3.06488	0.00217756	0.0509357	0	15.1611	3.37603	63.0997	49.4132
Zeb2	3231.32	-0.526499	0.171931	-3.06228	0.00219661	0.0512939	2630.88	2747.73	2864	3501.53	4412.44
Nfil3	1018.96	-0.711271	0.232486	-3.05942	0.00221768	0.0516982	724.947	901.64	807.997	1605.54	1054.66
Rpl17	1630.47	0.648612	0.212052	3.05874	0.00222267	0.0517268	2288.85	1633.83	1797.17	1353.14	1079.37
Cdkn2d	728.566	0.69064	0.226207	3.05313	0.00226465	0.0523497	853.827	915.017	807.997	628.994	436.998
Lrrc8a	959.821	0.654688	0.214428	3.05318	0.00226432	0.0523497	1235.51	1077.33	1057.82	829.311	599.135
Tsc22d3	12133.2	0.812808	0.266128	3.0542	0.00225664	0.0523497	10290.5	19879.8	13804.6	9975.77	6715.56
Zfp160	209.428	-1.08795	0.356265	-3.05377	0.00225984	0.0523497	111.53	155.178	166.551	219.347	394.533
Robo1	423.833	-0.831738	0.272699	-3.05002	0.00228828	0.052807	394.074	310.357	265.581	479.758	669.394
S100a13	2074.27	0.52474	0.1721	3.04903	0.0022958	0.0528918	2477.21	2286.65	2322.71	1800.85	1483.94
AW112010	3068.64	-0.664916	0.218193	-3.04738	0.00230844	0.0529608	1962.93	2544.39	2950.65	4488.09	3397.16
Cldn10	1355.27	0.850742	0.279145	3.04767	0.00230622	0.0529608	1195.85	2376.73	1374.04	919.453	910.283
Rps29	1662.14	0.64921	0.213056	3.04713	0.00231035	0.0529608	2303.72	1650.78	1877.07	1398.21	1080.91
Col16a1	1281.56	-0.830706	0.272823	-3.04486	0.00232791	0.0531518	780.713	890.046	1261.51	1309.07	2166.46
Glyctk	43.0221	-1.88256	0.618339	-3.04455	0.00233027	0.0531518	16.1099	32.1059	13.5041	83.1314	70.2594
Rpl23	1684.51	0.645116	0.211834	3.04538	0.00232388	0.0531518	2342.14	1766.71	1796.05	1428.26	1089.41
Copz2	2692.87	0.45873	0.150772	3.04255	0.00234581	0.0534177	3055.93	2987.63	3022.67	2245.55	2152.56
Bmp2	788.664	-0.598926	0.196942	-3.04113	0.00235692	0.0534935	697.684	625.172	639.195	1078.7	902.563
Pdcd4	1196.67	0.879825	0.289295	3.04128	0.00235577	0.0534935	2112.88	1248.56	1030.81	875.384	715.719
Man1c1	3203.32	-0.550731	0.181143	-3.04032	0.0023633	0.05355	2617.25	2351.75	3135.21	3818.03	4094.34
Ebp	1966.31	0.583701	0.192072	3.03897	0.00237392	0.0537021	2260.35	2407.05	2135.9	1742.75	1285.51
Atpif1	1045.53	0.593436	0.195791	3.03096	0.00243774	0.0550554	1311.1	1150.46	1163.61	891.409	711.086
Colq	5.70915	-6.17512	2.03882	-3.02877	0.00245552	0.0553659	0	0	0	10.0158	18.5299
Fjx1	44.867	1.8765	0.619882	3.02719	0.00246841	0.0555028	49.5691	56.1853	84.4008	11.0174	23.1624
Insig1	703.767	-0.891678	0.294571	-3.02703	0.00246966	0.0555028	534.107	599.309	440.009	656.037	1289.38
Rplp2	1828.66	0.667963	0.220762	3.02571	0.00248048	0.0556551	2658.14	1903.16	1879.32	1521.4	1181.28
Ldlrap1	2676.6	-0.46865	0.155361	-3.01653	0.00255686	0.0572753	2339.66	2209.95	2411.61	3317.24	3104.54
Pcgf5	432.809	0.713516	0.236627	3.01536	0.00256672	0.0573095	465.949	574.338	497.402	344.545	281.81
Rpl8	3173.9	0.62757	0.208106	3.01563	0.00256448	0.0573095	4483.52	3176.7	3425.55	2685.24	2098.52
Dennd1b	409.835	-0.976388	0.324267	-3.01106	0.00260339	0.0579402	408.945	265.765	212.69	460.728	701.049
Sdc4	6555.18	0.528589	0.175535	3.0113	0.00260135	0.0579402	7462.62	8381.41	6570.88	5618.88	4742.12
Dyrk1b	294.063	0.795049	0.264225	3.00898	0.00262126	0.0582435	390.356	300.547	371.363	217.344	190.704
Erp29	2250.46	0.480379	0.159696	3.00808	0.00262906	0.0583227	2625.92	2409.72	2578.16	1899	1739.5
Unc5b	328.421	0.841102	0.27967	3.00749	0.00263418	0.0583422	499.408	378.136	319.598	213.337	231.624
Cldn15	124.3	1.13799	0.378721	3.00483	0.0026573	0.0587597	153.664	185.501	137.292	87.1377	57.9061
Tmed9	7060.77	0.523892	0.174838	2.99643	0.00273157	0.060305	7323.83	8629.34	8165.49	6270.91	4914.29
Apold1	8.47735	-4.75545	1.58841	-2.99384	0.00275494	0.0607234	1.23923	0	1.12534	23.0364	16.9858
Rspo2	7484	-0.667493	0.223208	-2.99045	0.00278567	0.0613025	6173.83	4473.42	7528.55	10442.5	8801.72
Tll2	18.035	-2.84965	0.953315	-2.9892	0.00279709	0.0614556	4.95691	1.78366	9.00275	35.0554	39.3761
Rbl1	549.362	-0.677016	0.226621	-2.98744	0.00281328	0.0616186	452.318	473.561	403.998	613.97	802.964
Sfxn1	1452.65	0.532319	0.178187	2.98742	0.00281347	0.0616186	1494.51	1788.12	1688.02	1200.9	1091.72
AI854703	32.1555	1.97007	0.659733	2.98616	0.00282509	0.0617748	38.416	51.7261	47.2644	11.0174	12.3533
Nras	1142.51	0.659998	0.221083	2.9853	0.00283304	0.0618501	1617.19	1343.99	1056.7	825.304	869.363
Dad1	4498.58	0.522338	0.175058	2.9838	0.0028469	0.0620542	5012.67	4981.76	5366.76	4043.39	3088.32
Ssr4	2232.15	0.496884	0.166564	2.98314	0.00285309	0.0620909	2541.65	2638.03	2399.23	1928.05	1653.8
Iqgap3	6.22653	-6.29335	2.11075	-2.98158	0.00286768	0.0623098	0	0	0	28.0443	3.08832
4933436C20Rik	236.412	-1.07628	0.361193	-2.9798	0.00288435	0.0625732	106.573	165.88	218.317	415.657	275.633
Zcchc14	1361.91	0.652465	0.219037	2.9788	0.00289383	0.06268	1672.96	1492.92	1617.12	801.266	1225.29
Rps8	2263.18	0.676215	0.227178	2.97659	0.00291477	0.0630342	3420.26	2242.95	2321.58	1837.9	1493.2
Gprasp1	589.236	-0.817584	0.274758	-2.97565	0.0029237	0.0630429	449.839	361.191	544.666	619.98	970.506
Inpp5d	5.47541	-6.11196	2.05404	-2.97558	0.00292434	0.0630429	0	0	0	15.0237	12.3533
Gcnt2	959.187	0.901212	0.303148	2.97285	0.00295051	0.0635076	969.075	1699.83	865.389	515.815	745.83
Fam168b	2151.57	-0.560029	0.188419	-2.97225	0.00295622	0.063531	2011.26	1558.92	1856.82	2427.84	2903.02
9330133O14Rik	182.207	0.924147	0.311074	2.97082	0.00297003	0.0636828	252.802	230.984	190.183	128.203	108.863
Mapk11	51.7187	1.57242	0.529335	2.97056	0.00297254	0.0636828	71.8751	65.9954	73.1473	29.0459	18.5299
Glt25d1	4585.69	0.460679	0.155212	2.96806	0.00299683	0.0641032	4811.92	5046.86	5587.33	3669.8	3812.54
Col18a1	579.483	-0.715008	0.241256	-2.9637	0.00303969	0.0649191	535.346	440.564	408.5	639.01	873.996
Rpl35	2283.36	0.506413	0.170939	2.96254	0.00305113	0.0650624	2703.99	2539.04	2526.4	2005.17	1642.22
Rabgap1l	1127.22	-0.517417	0.174702	-2.96171	0.00305934	0.0651366	990.142	952.474	941.912	1300.05	1451.51
Aldh4a1	415.832	-0.742261	0.250736	-2.96033	0.00307309	0.0653282	389.117	263.982	330.851	540.855	554.354
Atp6v1c2	403.634	-1.0053	0.339697	-2.95941	0.0030823	0.0654227	256.52	347.813	257.704	793.254	362.878
Serf1	469.638	0.676788	0.228828	2.95763	0.00310016	0.0657006	530.389	495.857	631.318	328.519	362.106
Plag1	11.4975	4.32132	1.46153	2.9567	0.00310947	0.0657963	17.3492	13.3774	24.7576	2.00317	0
Kif4	105.21	-1.2265	0.415089	-2.9548	0.00312876	0.066103	70.6359	46.3751	88.9021	167.264	152.872
Il1rl1	10.4605	-4.07263	1.37896	-2.95341	0.00314282	0.0662981	0	0.891829	3.37603	31.0491	16.9858
Capn11	7.6315	6.28799	2.12993	2.9522	0.00315513	0.0664559	30.9807	2.67549	4.50137	0	0
Azin1	1836.68	-0.588458	0.199589	-2.94834	0.00319482	0.0670864	1753.51	1368.96	1465.2	2006.17	2589.56
Slc29a1	30171.3	0.423051	0.143468	2.94874	0.00319076	0.0670864	31425.5	35462.7	33868.3	24875.3	25224.7
Parp12	1659.47	-0.544221	0.184646	-2.94737	0.0032049	0.0671955	1260.29	1532.16	1413.43	2231.53	1859.94
Cd276	737.075	-0.65101	0.220984	-2.94596	0.00321957	0.0672978	649.355	515.477	636.944	824.303	1059.29
Rpl29	1850.21	0.70031	0.237709	2.94608	0.0032183	0.0672978	2676.73	1847.87	2034.62	1615.55	1076.28
Per1	366.138	1.34791	0.457742	2.94469	0.00323282	0.0674722	856.305	274.683	319.598	250.396	129.71
Dtx3l	1578.09	-0.573648	0.19502	-2.94149	0.00326642	0.0680701	1122.74	1544.65	1291.89	2017.19	1913.99
Plekha6	15.2244	-3.45851	1.17636	-2.94	0.00328212	0.0681909	7.43536	0.891829	1.12534	18.0285	48.6411
Znfx1	1153.49	-0.81971	0.278771	-2.94044	0.00327745	0.0681909	1146.28	557.393	947.539	1466.32	1649.94
Plscr1	1816.32	0.71626	0.243772	2.93824	0.00330084	0.0684762	1755.98	2493.56	2209.05	1618.56	1004.48
Nipa1	962.49	-0.765572	0.260678	-2.93684	0.00331573	0.0685783	588.633	669.764	997.054	1448.29	1108.71
Plekhh2	1166.54	-0.556121	0.189343	-2.93712	0.00331279	0.0685783	1101.67	857.94	986.926	1439.27	1446.88
1810027O10Rik	1031.06	0.563081	0.191812	2.93558	0.00332921	0.0687538	1141.33	1213.78	1196.24	894.414	709.542
Rplp0	8439.81	0.691374	0.235712	2.93313	0.00335559	0.0691945	12824.8	8385.87	8657.27	7309.55	5021.61
Rnf111	686.426	-0.553475	0.188859	-2.93063	0.00338278	0.0696508	587.393	563.636	584.053	832.316	864.731
Rpl39	1059.02	0.583841	0.199351	2.92871	0.00340371	0.0696646	1386.69	1154.92	1123.09	888.404	741.97
Srrt	453.452	-0.677122	0.231192	-2.92882	0.00340247	0.0696646	413.902	371.893	311.72	599.948	569.796
Tmod2	134.88	0.994981	0.33972	2.92882	0.00340247	0.0696646	184.645	145.368	175.554	83.1314	85.701
Zfpm2	106.034	-1.41307	0.482479	-2.92876	0.00340315	0.0696646	65.679	84.7238	40.5124	109.173	230.08
Dpysl2	2296.39	0.650207	0.222414	2.92341	0.00346223	0.0707571	3451.25	2328.57	2279.95	1588.51	1833.69
Serpina12	1213.7	-0.841989	0.288246	-2.92108	0.00348821	0.0710768	654.311	861.507	1249.13	1293.04	2010.5
Top2b	2032.13	-0.633116	0.216719	-2.92136	0.00348506	0.0710768	1638.26	1771.17	1586.73	2015.19	3149.32
Zfp316	216.14	-0.873155	0.29919	-2.91839	0.0035184	0.0715859	172.252	129.315	185.682	278.44	315.009
Cope	3109.69	0.463591	0.158934	2.91687	0.00353562	0.0717625	3557.82	3374.68	3548.21	2718.3	2349.44
Srebf2	1244.93	-0.887249	0.304196	-2.9167	0.00353752	0.0717625	1110.35	680.466	998.18	1131.79	2303.89
Lrba	317.954	-0.733509	0.251531	-2.91618	0.00354343	0.0717766	261.477	235.443	257.704	369.584	465.565
Itga11	3623.41	0.604419	0.207374	2.91463	0.00356106	0.0720046	4137.78	4466.28	3991.59	2174.44	3346.97
Sntb1	380.867	-0.753569	0.258579	-2.91428	0.00356516	0.0720046	311.046	347.813	237.447	473.749	534.28
Nrk	5.27509	-6.05844	2.07935	-2.91363	0.00357258	0.0720488	0	0	0	14.0222	12.3533
Gclm	663.734	0.615271	0.211317	2.9116	0.0035958	0.0723277	723.708	804.43	783.239	564.893	442.402
Setx	269.302	-0.875138	0.300579	-2.9115	0.00359693	0.0723277	189.602	228.308	187.932	287.454	453.211
Akap2	1882.7	0.548384	0.188451	2.90996	0.00361473	0.0724387	2032.33	2336.59	2097.64	1280.02	1666.92
Ankrd29	795.161	0.639094	0.219594	2.91034	0.00361032	0.0724387	812.932	1049.68	921.656	519.822	671.71
Gm11747	369.157	0.843183	0.289788	2.90966	0.00361825	0.0724387	482.059	491.398	371.363	309.489	191.476
Sod2	2718.35	0.463367	0.159295	2.90885	0.00362757	0.0725197	3291.39	3026.87	2843.74	2218.51	2211.24
Rps12	1298.1	0.792704	0.272642	2.90749	0.00364337	0.0727299	2188.47	1236.97	1261.51	1010.6	792.927
Rab31	2811.63	0.508673	0.174999	2.90671	0.00365248	0.0728061	3157.55	3591.4	2823.49	2149.4	2336.32
Cd44	1527.49	0.55854	0.192265	2.90506	0.00367186	0.0730052	1794.4	1695.37	1769.04	1013.6	1365.04
Mmp9	318.392	-1.08223	0.372546	-2.90495	0.00367308	0.0730052	166.056	144.476	349.982	469.742	461.704
Parp9	1458.84	-0.469292	0.16159	-2.90421	0.00368186	0.073074	1259.05	1272.64	1261.51	1743.76	1757.26
Nmi	1051.35	-0.601776	0.207273	-2.9033	0.00369257	0.073181	731.144	988.147	892.397	1428.26	1216.8
1700037H04Rik	1238.7	0.522627	0.180102	2.90183	0.00370985	0.0734176	1343.32	1341.31	1546.22	933.475	1029.18
Fdps	350.739	-1.01765	0.350952	-2.89968	0.00373549	0.073819	273.869	198.878	274.584	311.492	694.873
Crlf1	32.8502	1.89078	0.652189	2.89913	0.00374204	0.0738422	48.3298	39.2405	51.7658	11.0174	13.8975
Eda	1865.98	-0.655973	0.226542	-2.89559	0.00378443	0.0742526	1917.08	1344.88	1289.64	2095.31	2682.98
Fstl3	101.49	1.17569	0.405875	2.89668	0.00377137	0.0742526	130.119	156.07	105.782	49.0776	66.399
Ret	934.156	0.73609	0.254175	2.896	0.00377958	0.0742526	1435.02	876.668	1024.06	755.194	579.833
Slc7a6	1237.2	0.536825	0.185361	2.8961	0.0037783	0.0742526	1546.55	1451.9	1240.13	954.509	992.896
C4a	3294.26	-0.632041	0.218733	-2.88955	0.00385797	0.0754801	2207.06	2794.1	3100.32	3435.43	4934.37
Zfp275	1006.67	-0.932972	0.322835	-2.88994	0.00385319	0.0754801	1146.28	495.857	573.925	1259.99	1557.29
Traf3ip2	722.652	-0.737183	0.255194	-2.88872	0.00386818	0.0755724	565.087	452.158	694.337	1108.75	792.927
AI314180	1058.65	-0.676388	0.234277	-2.88712	0.00388781	0.0757407	1064.5	758.055	741.601	1181.87	1547.25
Rpl13	9238.42	0.472169	0.163537	2.88723	0.00388656	0.0757407	10926.3	10183.8	10087.6	8322.15	6672.32
4930562F07Rik	182.282	0.878439	0.305309	2.87721	0.00401208	0.0780511	225.539	239.902	203.687	107.169	135.114
Ptplb	2114.78	0.458755	0.159519	2.87586	0.00402926	0.0782746	2287.61	2494.45	2337.34	1786.82	1667.69
D0H4S114	2035.83	-0.522972	0.181892	-2.87518	0.00403801	0.0783339	1697.74	1538.41	1963.72	2345.71	2633.57
9430020K01Rik	413.298	-0.681745	0.237185	-2.87432	0.00404898	0.0784361	386.639	321.95	290.339	544.861	522.699
Ccdc141	6.7917	-5.41211	1.88441	-2.87205	0.00407815	0.0788902	1.23923	0	0	8.01266	24.7066
Slc35e4	1363.08	0.629837	0.219459	2.86995	0.00410534	0.0793045	1531.68	1665.94	1564.23	1245.97	807.597
Ror2	483.806	-0.823168	0.287082	-2.86736	0.00413913	0.0798452	328.395	275.575	506.405	667.054	641.599
Lman2l	2195.2	-0.586055	0.20456	-2.86496	0.00417068	0.0803411	1526.73	1723.91	2234.93	2881.55	2608.86
Arid5b	1151.11	0.656644	0.229451	2.86181	0.00421234	0.0810302	1187.18	1576.75	1279.52	1012.6	699.505
Ngef	5.95962	-6.23979	2.18103	-2.86094	0.00422389	0.0811387	0	0	0	2.00317	27.7949
Epm2aip1	782.877	-0.59333	0.207543	-2.85883	0.00425207	0.0815662	717.512	603.769	631.318	872.379	1089.41
Ankrd50	386.571	-0.83817	0.293431	-2.85644	0.00428417	0.0820676	344.505	260.414	277.96	390.617	659.357
Agrn	1071.32	-0.816394	0.285987	-2.85466	0.00430833	0.0820731	1194.61	661.737	608.811	1361.15	1530.26
Irs2	730.814	0.661354	0.231594	2.85566	0.00429474	0.0820731	829.042	823.159	919.406	434.687	647.776
Ptprm	1946.91	-0.620733	0.217392	-2.85537	0.00429868	0.0820731	1765.9	1610.64	1431.44	1964.1	2962.47
Sytl2	94.171	-1.27999	0.448376	-2.85473	0.00430729	0.0820731	35.9376	66.8872	76.5234	160.253	131.254
Omd	1366.2	-0.59525	0.208573	-2.85392	0.00431828	0.0821489	965.357	1258.37	1179.36	1485.35	1942.56
Egfl7	27.0208	2.50246	0.877614	2.85144	0.00435218	0.0826793	37.1768	38.3487	45.0137	13.0206	1.54416
Dnpep	1963.88	0.517806	0.181827	2.84779	0.00440234	0.0834162	2314.87	2369.59	2014.36	1717.71	1402.87
Ssr3	14781.9	-0.456152	0.16018	-2.84774	0.0044031	0.0834162	13879.3	12075.4	12648.9	19201.3	16104.8
Sema6d	4204.33	0.648526	0.227804	2.84685	0.00441539	0.0835341	5393.11	4950.55	4406.84	2339.7	3931.44
Cdc45	43.5351	1.72671	0.606976	2.84478	0.00444424	0.0839643	40.8945	62.4281	77.6487	22.0348	14.6695
Tceb2	2330.19	0.574375	0.201978	2.84375	0.00445864	0.0841209	2889.88	2459.67	2697.45	2122.35	1481.62
Procr	332.849	0.704931	0.247952	2.84302	0.00446884	0.0841927	343.266	405.782	432.132	231.366	251.698
Sf1	2585.21	-0.486384	0.171105	-2.8426	0.00447469	0.0841927	2500.76	1998.59	2185.42	3152.98	3088.32
Camp	55.8236	-1.57717	0.555128	-2.84109	0.0044959	0.0844702	27.263	22.2957	43.8884	116.184	69.4873
Tspo	1162.36	0.595667	0.209692	2.84068	0.00450172	0.0844702	1442.46	1310.99	1278.39	1042.65	737.337
Pdgfd	1598.09	-0.551209	0.194213	-2.83817	0.00453736	0.085023	1127.7	1515.22	1397.68	2085.3	1864.58
Rpl7a	2476.42	0.603505	0.21284	2.83549	0.00457559	0.0856227	3454.96	2664.79	2485.88	2157.41	1619.05
Lair1	5.10396	-6.00893	2.12	-2.8344	0.00459112	0.0857965	0	0	0	17.0269	8.49289
Tgfbr3	19971.2	-0.681719	0.240574	-2.83372	0.00460099	0.0858642	21081.7	12895	14279.5	21052.3	30547.4
Pgf	1635.11	0.553841	0.195521	2.83264	0.00461655	0.0860379	1578.77	2019.1	2024.49	1168.85	1384.34
Zfp521	328.284	-0.670815	0.23687	-2.83199	0.00462587	0.086095	267.673	280.926	247.576	413.654	431.593
Gpam	350.97	-0.74569	0.263428	-2.83071	0.00464443	0.0863237	296.175	249.712	283.587	382.605	542.773
Nt5dc3	151.595	-1.29739	0.458796	-2.82781	0.0046868	0.0869051	152.425	67.779	67.5206	303.48	166.769
Rps18	2684.59	0.672127	0.237694	2.8277	0.00468835	0.0869051	3785.84	2997.44	2679.44	2433.85	1526.4
C130050O18Rik	5.77041	5.89378	2.08695	2.82411	0.00474123	0.087649	6.19613	8.02646	14.6295	0	0
Sh2d4a	749.526	-0.664436	0.235241	-2.82449	0.00473564	0.087649	520.475	553.826	748.353	863.365	1061.61
Dph1	325.807	-0.688644	0.244391	-2.81779	0.0048355	0.0891521	250.324	284.494	249.826	453.717	390.673
Igsf1	57.5122	-1.38984	0.49322	-2.81789	0.00483398	0.0891521	40.8945	30.3222	33.7603	79.1251	103.459
Pmepa1	4405.51	0.518528	0.184115	2.81632	0.00485773	0.089442	5210.95	5552.53	4267.3	3825.05	3171.71
Enc1	87.585	1.3271	0.471323	2.81569	0.00486731	0.0894986	152.425	116.83	76.5234	55.0871	37.0599
Tmem39a	1914.2	0.447073	0.15886	2.81425	0.00488911	0.0897795	2109.16	2077.96	2240.56	1594.52	1548.79
Jph1	63.0255	-1.40697	0.500129	-2.81321	0.00490503	0.0899517	45.8514	35.6732	32.635	75.1187	125.849
Tprgl	5082.14	0.443747	0.15779	2.81226	0.00491942	0.0900955	5388.16	6081.38	5581.7	4455.04	3904.41
2022-03-03	314.559	0.8034	0.285852	2.81055	0.00494571	0.0904187	407.705	389.729	339.854	266.421	169.086
Tchh	30.3921	-2.56021	0.911024	-2.81026	0.00495022	0.0904187	22.3061	4.45915	4.50137	28.0443	92.6497
Steap3	706.282	0.972579	0.346233	2.80903	0.00496906	0.0906425	1312.34	653.711	669.579	576.912	318.869
Adora1	8.0051	6.37316	2.26993	2.80764	0.00499056	0.0909141	0	27.6467	12.3788	0	0
Amigo2	475.928	0.732431	0.261061	2.8056	0.00502234	0.0910002	586.154	578.797	532.287	420.665	261.735
Ap3d1	1338.01	-0.476276	0.169808	-2.80479	0.00503498	0.0910002	1132.65	1208.43	1129.84	1534.43	1684.68
Klf6	8597.64	0.636703	0.226922	2.80582	0.0050189	0.0910002	7939.72	13389	8757.42	6438.18	6463.86
Krt81	8.39215	-5.72288	2.03892	-2.80682	0.00500339	0.0910002	0	0	1.12534	40.0633	0.772081
Pou6f1	575.764	-0.870597	0.310379	-2.80495	0.00503242	0.0910002	280.065	395.972	621.19	773.222	808.369
Rps15	1323.99	0.584217	0.20829	2.80483	0.00503426	0.0910002	1715.09	1373.42	1493.33	1171.85	866.275
Ror1	545.748	0.73882	0.263455	2.80435	0.00504174	0.0910027	840.195	599.309	510.906	367.581	410.747
Apbb1	757.096	0.570917	0.203897	2.80003	0.00510977	0.0916294	868.698	764.298	980.174	590.934	581.377
Heatr3	931.018	-0.57354	0.204793	-2.80058	0.00510111	0.0916294	895.961	701.87	739.351	1253.98	1063.93
Hrh1	9.63957	-4.35055	1.55374	-2.80006	0.00510934	0.0916294	0	0	3.37603	17.0269	27.7949
Ifngr2	6848.2	0.41994	0.149973	2.80009	0.00510878	0.0916294	7291.61	7660.81	7899.91	6016.51	5372.14
Ppp1r10	927.543	-0.510723	0.182317	-2.8013	0.00508977	0.0916294	794.344	755.38	829.378	1072.7	1185.92
Nab2	723.149	0.717775	0.256448	2.7989	0.00512765	0.0918303	930.659	611.795	1030.81	539.853	502.625
Dmtf1	625.199	-0.586554	0.209798	-2.79581	0.00517704	0.0925229	500.647	512.802	549.168	697.102	866.275
Nbas	468.516	-0.804172	0.287653	-2.79564	0.00517978	0.0925229	464.71	305.006	313.971	503.796	755.095
Tmem30b	1139.53	-0.476338	0.170424	-2.79501	0.00518987	0.092583	985.185	972.986	998.18	1326.1	1415.22
Fgf7	5462.58	-0.438271	0.156871	-2.79384	0.00520858	0.0927965	4794.57	4353.91	5202.46	6403.12	6558.83
Adipor2	1353.46	0.515092	0.184654	2.7895	0.00527889	0.0930844	1729.96	1370.74	1514.71	1051.66	1100.22
C4b	39471.4	-0.528163	0.189219	-2.79128	0.00525001	0.0930844	28466.3	34150.8	38004	42090.5	54645.6
Chad	5.42526	-6.0946	2.18348	-2.79123	0.00525082	0.0930844	0	0	0	24.038	3.08832
Fbln7	162.453	-1.06649	0.382247	-2.79005	0.00527003	0.0930844	83.0282	107.02	148.545	291.461	182.211
Grtp1	330.451	-0.78665	0.281942	-2.79012	0.00526893	0.0930844	214.386	226.525	327.475	477.755	406.115
Nfrkb	347.971	-0.812821	0.29137	-2.78965	0.00527645	0.0930844	316.003	244.361	241.949	361.571	575.972
Polr2f	748.911	0.604275	0.216504	2.79105	0.00525374	0.0930844	898.439	824.942	878.893	662.046	480.234
Rpusd3	156.505	1.03434	0.370464	2.79201	0.00523818	0.0930844	157.382	261.306	171.052	110.174	82.6127
Lmna	2557.79	0.457668	0.164313	2.78534	0.00534718	0.0941679	2857.66	2929.66	2821.24	2272.59	1907.81
Slc7a7	96.4574	1.11254	0.399489	2.78492	0.00535412	0.0941696	101.617	145.368	121.537	55.0871	58.6781
Myb	15.4318	-3.29032	1.18191	-2.78389	0.00537107	0.094347	3.71768	0	6.75206	45.0712	21.6183
Slc8a3	113.079	-1.14864	0.412847	-2.78224	0.00539847	0.0947073	63.2005	69.5627	95.6542	126.199	210.778
Fas	650.575	0.671908	0.241614	2.78092	0.00542049	0.0949725	605.982	888.262	798.994	427.676	531.964
Nbl1	504.951	0.814075	0.292786	2.78045	0.00542838	0.0949897	572.523	827.618	429.881	356.564	338.171
Limch1	3485.96	0.759342	0.273216	2.77927	0.0054481	0.0951432	3831.69	4490.36	4184.03	1557.46	3366.27
Stk17b	3439.43	-0.449205	0.161637	-2.7791	0.00545099	0.0951432	3048.5	2745.94	3209.48	3898.16	4295.09
Hcn1	10.0531	-3.78023	1.36353	-2.77239	0.00556466	0.0970043	0	3.56732	1.12534	27.0427	18.5299
Rpl32	3155.99	0.51515	0.185869	2.77157	0.0055786	0.0971241	4031.2	3316.71	3412.04	2816.45	2203.52
Cpne8	1153.02	0.591361	0.213489	2.76999	0.00560584	0.0973574	1426.35	1498.27	1071.33	951.504	817.634
Lrrc61	9797.29	0.533768	0.192712	2.76977	0.00560957	0.0973574	11071.2	12135.1	10332.9	9108.4	6338.78
Mosc1	4121.78	-0.523869	0.189153	-2.76956	0.00561324	0.0973574	3209.6	3902.65	3408.67	5775.13	4312.84
Iqce	328.906	-0.700289	0.252943	-2.76856	0.00563045	0.097533	302.371	256.847	230.695	400.633	453.984
Dstyk	806.641	-0.652856	0.236022	-2.76608	0.00567342	0.0981537	774.516	511.91	684.209	931.472	1131.1
Zkscan1	1112.84	-0.660395	0.238918	-2.76411	0.00570785	0.0986254	1047.15	863.291	800.119	1118.77	1734.87
Dpysl5	7.5092	-4.5688	1.65403	-2.76223	0.00574084	0.099071	1.23923	0	1.12534	12.019	23.1624
Osbpl5	1988.71	-0.50284	0.182188	-2.76001	0.00577995	0.0996209	1738.63	1627.59	1746.53	2725.31	2105.46
Kcns3	655.665	0.61423	0.222662	2.75858	0.00580538	0.0999339	632.005	870.426	780.988	473.749	521.155
Repin1	1373	0.479023	0.173708	2.75764	0.00582206	0.100019	1694.02	1480.44	1469.7	1116.77	1104.08
Xaf1	795.036	-0.720611	0.26133	-2.75748	0.00582488	0.100019	505.604	604.66	783.239	1243.97	837.708
Sdc3	4225.94	-0.554328	0.201099	-2.75649	0.00584255	0.100197	3990.31	2838.69	3849.8	4700.43	5750.46
Cfd	89.0371	1.57481	0.571759	2.75433	0.00588119	0.100735	47.0906	192.635	123.788	43.0681	38.604
Cyth3	2216.74	0.667777	0.242587	2.75273	0.00591001	0.10108	2343.38	3472.78	1990.73	1523.41	1753.4
Rpl7	4551.02	0.503677	0.182996	2.7524	0.00591604	0.10108	5908.63	4801.61	4766.95	4024.36	3253.55
Erp27	8.76969	4.99712	1.81652	2.75094	0.00594248	0.10128	9.91381	16.0529	16.8802	1.00158	0
Tmed3	5610.59	0.422782	0.153668	2.75127	0.00593643	0.10128	6167.63	6205.35	6361.57	5017.93	4300.49
Ly6g6e	36.562	1.95184	0.709662	2.75038	0.00595269	0.101328	27.263	50.8343	77.6487	17.0269	10.0371
Efr3a	3314.44	-0.4156	0.151152	-2.74955	0.00596775	0.10142	2915.9	3017.95	2838.12	3759.94	4040.3
Klhdc5	714.308	-0.623397	0.22675	-2.74927	0.00597281	0.10142	658.029	550.259	554.794	759.2	1049.26
Rpl24	2481.47	0.572886	0.208472	2.74803	0.00599549	0.101679	3393	2635.36	2538.77	2196.47	1643.76
Bgn	68998.3	0.401846	0.146262	2.74743	0.00600641	0.101739	75932.4	80493.8	72864.9	61058.5	54641.7
Irf9	2157.96	-0.521355	0.189968	-2.74444	0.00606145	0.102545	1614.71	1870.17	2027.87	2937.64	2339.41
Cthrc1	32.965	1.95326	0.712455	2.74159	0.00611425	0.103185	70.6359	33.8895	36.011	15.0237	9.26497
Snx19	1724.66	-0.554266	0.202163	-2.74168	0.0061125	0.103185	1718.81	1194.16	1446.07	2042.23	2222.05
Mocs1	1246.95	-0.525971	0.191925	-2.7405	0.00613455	0.1034	904.635	1178.11	1097.21	1575.49	1479.31
Car2	601.585	1.04873	0.383043	2.73788	0.00618366	0.1041	985.185	518.153	770.86	536.849	196.881
Exoc6	10.6629	3.70723	1.35523	2.7355	0.00622847	0.104599	27.263	13.3774	10.1281	1.00158	1.54416
Prr16	1541.96	-0.589687	0.215556	-2.73565	0.00622564	0.104599	982.706	1367.17	1497.83	1975.12	1886.97
Hspa8	34403	0.477013	0.174532	2.7331	0.00627419	0.105238	37782.8	36037.9	42485.1	31495.8	24213.2
Col6a3	1201.13	-0.887862	0.324983	-2.73202	0.00629467	0.105325	1264.01	509.235	917.155	1344.12	1971.12
Slc22a5	1647.25	-0.481711	0.176304	-2.73227	0.00628993	0.105325	1489.55	1516.11	1259.26	2054.25	1917.08
Tgfbrap1	409.321	-0.917189	0.335851	-2.73094	0.00631538	0.105543	437.447	234.551	235.197	450.712	688.696
Agpat9	79.556	1.22755	0.449905	2.72847	0.00636295	0.106209	101.617	130.207	77.6487	45.0712	43.2365
Mylip	1683.48	0.701687	0.257255	2.72759	0.00637986	0.106362	2426.41	1756.01	1787.05	1548.45	899.474
Fam198a	262.729	-0.808661	0.296653	-2.72595	0.00641166	0.106589	173.492	174.799	257.704	382.605	325.046
Kif7	79.6017	-1.16983	0.429124	-2.72608	0.00640908	0.106589	54.526	55.2934	49.5151	98.1551	140.519
Tsku	404.415	1.01914	0.373902	2.72569	0.00641671	0.106589	733.622	273.792	514.282	293.464	206.918
Eef1a1	23688.3	0.575006	0.21101	2.72501	0.0064299	0.106679	34772.7	23817.2	23233.8	20032.7	16585.1
Dhx32	944.489	-0.488988	0.179584	-2.72289	0.0064713	0.106979	783.191	865.966	789.991	1156.83	1126.47
Rpl36	1323.05	0.643082	0.236138	2.72333	0.00646272	0.106979	1762.18	1495.6	1377.42	1214.92	765.132
Tmem107	241.123	0.817999	0.300407	2.72297	0.00646987	0.106979	241.649	339.787	292.589	190.301	141.291
Nxf1	1089.71	-0.523993	0.192555	-2.72126	0.00650327	0.107378	809.215	1048.79	922.782	1342.12	1325.66
Evi2b	17.0716	-2.58256	0.949523	-2.71985	0.00653118	0.107685	2.47845	9.81012	4.50137	33.0522	35.5157
Fam49a	279.207	-0.884155	0.325113	-2.71953	0.00653753	0.107685	146.229	254.171	225.069	313.496	457.072
Fam105a	850.62	0.642735	0.236437	2.71842	0.00655953	0.107918	772.038	1229.83	977.923	623.986	649.32
Tnip2	347.979	0.698521	0.257051	2.71744	0.00657884	0.108107	343.266	441.456	447.887	276.437	230.852
Prdx5	3489.58	0.445431	0.163956	2.71677	0.00659229	0.108198	3953.13	4096.17	3662.99	3105.91	2629.71
Stra13	514.848	0.608845	0.224256	2.71495	0.00662849	0.108663	505.604	635.874	649.323	396.627	386.813
Ptges	671.638	-0.546417	0.201317	-2.71421	0.00664343	0.108778	620.852	515.477	566.048	797.26	858.554
Phactr1	1527.18	0.482549	0.177871	2.71292	0.00666932	0.109072	1686.59	1839.84	1641.88	1341.12	1126.47
Adrbk2	60.4666	-1.47003	0.541992	-2.71227	0.00668233	0.109155	33.4591	22.2957	50.6405	117.185	78.7522
Sema4c	1276.06	0.699548	0.257971	2.71174	0.0066932	0.109203	1948.06	1034.52	1541.72	909.437	946.571
Ost4	3013.42	0.422745	0.156102	2.70814	0.00676622	0.109873	3399.2	3254.29	3408.67	2653.19	2351.76
Plekha2	2752.95	-0.420701	0.155292	-2.7091	0.00674658	0.109873	2484.65	2515.85	2273.19	3195.05	3296.01
Prkacb	2984.21	-0.436905	0.161299	-2.70866	0.00675557	0.109873	2743.65	2569.36	2530.9	3276.18	3800.95
Yif1b	1661.16	0.447918	0.165375	2.7085	0.00675878	0.109873	1948.06	1803.28	1827.56	1428.26	1298.64
Rps3a	6708.22	0.51966	0.192013	2.70638	0.00680206	0.110325	8999.26	7137.31	6757.69	5936.38	4710.47
2810422J05Rik	588.717	0.564489	0.208775	2.70382	0.00685475	0.111049	732.383	649.252	647.072	491.777	423.1
Srsf5	3448.65	-0.648726	0.240031	-2.70267	0.00687844	0.111301	2141.38	3717.14	2571.41	3922.2	4891.13
Clec4f	4.69086	-5.89182	2.1812	-2.70118	0.00690937	0.111539	0	0	0	8.01266	15.4416
Ndrg2	2632.62	0.753725	0.279025	2.70128	0.00690725	0.111539	2686.64	4571.52	2174.16	1995.15	1735.64
4933426M11Rik	3660.06	0.454836	0.16841	2.70076	0.00691805	0.111548	4436.43	3708.23	4167.15	3212.08	2776.4
Abcb10	495.018	-0.57396	0.212635	-2.69927	0.00694914	0.111788	420.098	378.136	444.511	606.959	625.385
Ythdf3	1720.44	-0.511442	0.18947	-2.69933	0.00694794	0.111788	1304.91	1608.86	1496.71	1873.96	2317.79
Adam12	2171.33	-0.647374	0.240042	-2.69692	0.00699845	0.111796	2100.49	1373.42	1838.81	2225.52	3318.4
Arhgap44	42.0205	-1.55987	0.578167	-2.69796	0.00697664	0.111796	18.5884	29.4304	22.5069	80.1266	59.4502
Atp2b4	468.538	0.960744	0.356105	2.69792	0.00697733	0.111796	869.937	541.34	334.227	264.418	332.767
Gm10336	18.6426	-2.44691	0.907268	-2.69701	0.00699646	0.111796	11.153	3.56732	5.62672	45.0712	27.7949
Mif	1197.72	0.557212	0.206477	2.69867	0.00696174	0.111796	1519.29	1190.59	1411.18	1050.66	816.862
Smchd1	512.997	-0.722509	0.26788	-2.69713	0.00699396	0.111796	426.294	385.27	410.75	498.788	843.884
Lgals1	2467.36	0.628913	0.233558	2.69275	0.00708655	0.113072	3658.2	2478.39	2483.63	2155.41	1561.15
4930523C07Rik	538.378	0.736585	0.273785	2.69038	0.00713705	0.113615	588.633	805.322	528.911	313.496	455.528
Tmc6	1042.34	0.517944	0.192496	2.69067	0.0071308	0.113615	1132.65	1244.1	1178.23	922.458	734.249
Atg2a	482.28	-0.755513	0.280968	-2.68897	0.00716737	0.113702	475.863	272.9	387.118	562.89	712.631
Eif4ebp2	942.965	0.614399	0.228466	2.68924	0.00716155	0.113702	1349.52	883.803	1052.2	678.072	751.235
Zfp445	630.289	-0.681277	0.253307	-2.68953	0.00715529	0.113702	573.762	474.453	476.02	631.999	995.212
Shq1	233.959	0.877421	0.326405	2.68814	0.00718522	0.113854	241.649	308.573	307.219	197.312	115.04
Angpt1	3924.03	-0.483225	0.179867	-2.68657	0.00721905	0.113996	3106.74	3757.28	3291.63	4189.62	5274.86
Bet1l	1346.95	0.548776	0.204243	2.68688	0.00721231	0.113996	1525.49	1536.62	1563.1	1240.96	868.591
Pigt	1400.67	0.66584	0.247806	2.68694	0.00721105	0.113996	2041.01	1262.83	1627.25	1212.92	859.326
Rps9	4282.13	0.530173	0.197429	2.68539	0.00724456	0.114268	5826.84	4427.93	4393.34	3769.96	2992.59
Plscr2	1688.67	0.753263	0.280599	2.68449	0.00726414	0.114446	1519.29	2591.66	1937.84	1524.41	870.135
Myo18a	1352.45	-0.630804	0.235191	-2.6821	0.00731627	0.115135	1340.84	1003.31	984.675	1388.19	2045.24
1810037I17Rik	1845.81	0.437767	0.16332	2.68042	0.00735299	0.115581	1998.87	2191.22	1994.11	1572.49	1472.36
Dnajb1	1955.18	0.493411	0.184201	2.67866	0.00739173	0.115925	2179.8	1950.43	2503.89	1668.64	1473.13
Nrd1	1020.47	-0.520849	0.194429	-2.67886	0.00738722	0.115925	861.262	799.971	947.539	1127.78	1365.81
Cgnl1	124.844	1.30559	0.4876	2.67758	0.00741559	0.116034	74.3536	238.118	178.93	64.1013	68.7152
Ethe1	290.731	0.680527	0.254142	2.67775	0.00741193	0.116034	337.07	329.085	360.11	234.37	193.02
Mndal	530.269	-0.729825	0.272706	-2.67623	0.00744554	0.11637	289.979	514.586	453.513	706.116	687.152
Nfkbie	3829.55	0.43714	0.163398	2.6753	0.00746619	0.116561	4324.9	3964.18	4540.76	3396.37	2921.55
Kdelr2	7508.57	0.61886	0.231394	2.67449	0.0074844	0.116713	11678.5	6654.83	7845.89	5647.93	5715.71
Cx3cl1	11131.6	-0.599168	0.224119	-2.67343	0.00750799	0.116948	7631.16	7776.75	12284.2	14551	13414.9
Gpr137c	5.95094	-5.21954	1.95327	-2.67221	0.00753543	0.117242	0	0	1.12534	7.01108	21.6183
2610101N10Rik	911.234	-0.606298	0.227054	-2.67028	0.00757888	0.117785	680.335	918.584	661.702	1021.61	1273.93
2410018M08Rik	1267.73	0.515645	0.193212	2.66881	0.00761208	0.11783	1423.87	1395.71	1502.33	1145.81	870.907
Blvrb	491.86	0.642883	0.240901	2.66865	0.00761557	0.11783	598.546	550.259	573.925	434.687	301.884
Casc4	975.347	-0.507178	0.190044	-2.66874	0.00761371	0.11783	919.506	817.808	767.484	1115.76	1256.18
Fkbp5	1329.28	0.720589	0.270022	2.66864	0.00761601	0.11783	1886.1	1824.68	1020.69	1058.67	856.238
Pik3r3	585.228	-0.683404	0.256182	-2.66765	0.00763843	0.118044	531.628	436.996	445.636	586.928	924.953
Peg13	2081.04	-0.736641	0.276244	-2.66664	0.00766147	0.118267	2394.19	1245.89	1290.77	2542.02	2932.36
Cxcr7	9.58188	4.0431	1.51689	2.66538	0.00769012	0.118576	13.6315	14.2693	18.0055	2.00317	0
Tagln2	13286.1	0.442902	0.166212	2.66468	0.00770611	0.11869	15676.2	14541.3	14352.6	12242.3	9617.81
Anxa2	7557.23	0.418896	0.157311	2.66285	0.0077482	0.119071	8123.13	8490.22	8598.75	6866.85	5707.22
Nlrc5	272.669	-0.707268	0.265605	-2.66286	0.00774807	0.119071	205.712	250.604	195.81	374.592	336.627
Plin2	1454.09	0.497487	0.186856	2.6624	0.00775845	0.119096	1681.63	1697.15	1558.6	1310.07	1023.01
Rpl10	6283.84	0.463626	0.174276	2.6603	0.00780716	0.11971	8172.7	6456.84	6550.62	5396.53	4842.49
Cacna1g	38.4893	1.68839	0.635193	2.65808	0.00785882	0.120368	57.0044	68.6709	33.7603	16.0253	16.9858
Rps24	1830.24	0.583053	0.21945	2.65688	0.00788679	0.120528	2658.14	1884.44	1790.42	1523.41	1294.78
Srsf11	1654.26	0.425908	0.16029	2.6571	0.00788157	0.120528	1847.69	1793.47	1887.2	1350.13	1392.83
Tenc1	3321.97	0.502399	0.189147	2.65613	0.00790442	0.120663	4267.9	3938.32	3087.94	2779.39	2536.29
Evc2	830.932	-0.558592	0.210361	-2.6554	0.00792149	0.12079	591.111	746.461	758.481	944.493	1114.11
Syt13	5.38361	5.79705	2.18373	2.65465	0.00793912	0.120924	2.47845	9.81012	14.6295	0	0
Eya1	611.312	-0.696461	0.262583	-2.65235	0.00799331	0.121481	434.968	448.59	585.179	965.526	622.297
R3hdml	9.24716	-4.27875	1.613	-2.65266	0.00798605	0.121481	0	0	3.37603	32.0507	10.8091
Dhx40	829.973	0.566152	0.213497	2.65181	0.00800627	0.121543	1111.59	825.834	925.032	597.945	689.468
Znf512b	507.292	-0.650366	0.245685	-2.64715	0.00811722	0.123092	491.973	325.518	423.129	627.993	667.85
Foxs1	875.274	-0.592029	0.224199	-2.64064	0.008275	0.125132	742.297	837.428	602.059	1227.94	966.645
Ppip5k2	198.029	-1.07739	0.408028	-2.64047	0.00827908	0.125132	136.315	133.774	141.793	158.25	420.012
Rpl15	3528.19	0.553008	0.209415	2.64073	0.0082728	0.125132	4922.21	3505.78	3701.25	3115.92	2395.77
Fam176a	1521.83	0.567386	0.215117	2.63757	0.00835031	0.12607	1397.85	1967.38	1881.57	1313.08	1049.26
Pisd	1116.63	0.49562	0.187997	2.63632	0.00838096	0.126394	1122.74	1256.59	1411.18	902.426	890.209
Tex15	8.84175	-4.28426	1.62538	-2.63586	0.00839247	0.126429	0	0.891829	2.25069	4.00633	37.0599
Arhgap20	45.6298	-1.77501	0.673745	-2.63454	0.00842514	0.126783	43.3729	14.2693	12.3788	70.1108	88.0172
Tfcp2	1502.9	-0.762181	0.289582	-2.63201	0.00848813	0.127591	967.836	828.51	1730.78	2161.42	1825.97
Leo1	396.445	-0.734637	0.279209	-2.63114	0.00850986	0.127692	235.453	310.357	393.87	472.747	569.796
Mir1198	615.255	0.64477	0.245066	2.631	0.00851341	0.127692	646.876	675.115	833.879	542.858	377.548
Chd2	323.385	-0.925084	0.351836	-2.6293	0.008556	0.128074	187.123	324.626	201.436	318.503	585.237
Gng7	369.741	-0.675956	0.257091	-2.62924	0.00855753	0.128074	296.175	245.253	354.483	451.714	501.08
Bend3	102.466	-1.44528	0.54989	-2.6283	0.00858118	0.128289	89.2243	33.8895	59.6432	87.1377	242.433
Chpf	4310.53	0.383165	0.145857	2.627	0.00861425	0.128504	4720.21	4771.29	4770.33	3753.93	3536.9
Tmem120a	924.789	0.581734	0.221426	2.62722	0.00860868	0.128504	1094.24	1103.19	1000.43	849.342	576.744
Anxa6	9506.81	0.412129	0.156964	2.62563	0.00864886	0.128602	9905.14	11779.3	9982.92	7876.45	7990.26
Kcne1l	5.59196	-5.12031	1.95009	-2.62568	0.0086477	0.128602	0	0	1.12534	16.0253	10.8091
Tanc1	607.317	-0.762664	0.290439	-2.6259	0.00864192	0.128602	613.417	394.189	418.628	608.963	1001.39
Rps25	2446.41	0.481889	0.183678	2.62355	0.00870174	0.129248	3083.2	2603.25	2592.79	2192.47	1760.34
2810428I15Rik	1160.91	0.575849	0.219656	2.62159	0.00875194	0.129828	1394.13	1240.53	1375.17	1076.7	718.035
4930478L05Rik	11.1867	4.25805	1.62484	2.6206	0.00877754	0.129828	37.1768	13.3774	3.37603	2.00317	0
Pkd2	2546.53	-0.55816	0.212985	-2.62065	0.00877616	0.129828	2402.86	1990.56	2033.5	2520.98	3784.74
Rpl36a	822.842	0.5925	0.226117	2.62033	0.00878453	0.129828	1126.46	920.368	805.746	701.108	560.531
Stx2	431.901	0.599419	0.228769	2.62019	0.00878797	0.129828	475.863	560.069	463.641	312.494	347.436
Rpl37a	2556.26	0.575335	0.219819	2.61731	0.00886257	0.130789	3379.37	2521.2	2929.27	2361.73	1589.71
Krba1	216.212	-0.813024	0.310962	-2.61455	0.00893458	0.131662	162.339	130.207	205.938	271.429	311.149
Sh2b2	172.489	0.799271	0.305729	2.61431	0.00894082	0.131662	205.712	230.984	186.807	116.184	122.761
Fastk	915.012	0.499565	0.191219	2.61252	0.00898764	0.13221	940.573	1024.71	1143.35	759.2	707.226
Fnbp4	430.371	-0.817246	0.312902	-2.61183	0.00900584	0.132336	242.888	443.239	302.717	462.731	700.277
BC046404	546.599	0.650741	0.249345	2.6098	0.00905955	0.132841	750.971	623.389	543.541	470.744	344.348
Pax9	20.006	2.30608	0.883574	2.60994	0.0090557	0.132841	27.263	34.7813	25.8829	9.01425	3.08832
Vps39	634.359	-0.54024	0.207086	-2.60877	0.00908678	0.133099	581.197	492.29	537.914	721.14	839.252
Plec	791.689	0.542831	0.208204	2.60721	0.00912827	0.133422	936.855	913.233	866.514	533.844	707.998
Tra2b	3493.85	0.412421	0.15817	2.60745	0.009122	0.133422	3852.75	3853.59	3931.95	3147.98	2682.98
Pcdhgb4	135.185	-0.908059	0.348708	-2.60406	0.00921255	0.134511	106.573	112.371	81.0247	205.325	170.63
Fth1	84906.3	0.459819	0.176633	2.60324	0.0092346	0.13469	107286	84295.7	94352.2	76921.6	61676.1
Samhd1	5042.26	-0.387595	0.148957	-2.60206	0.00926645	0.135011	4592.57	4615.22	4258.3	6076.6	5668.62
Lin7a	124.755	1.14751	0.441222	2.60075	0.00930208	0.135387	116.487	215.823	147.42	49.0776	94.9659
Cherp	1074.53	-0.482772	0.185681	-2.6	0.00932225	0.135504	945.53	824.942	1011.68	1281.02	1309.45
Kpna2	797.867	0.623554	0.23988	2.59944	0.00933763	0.135504	891.004	904.315	988.052	741.171	464.793
Rasgrp2	504.817	0.577086	0.222011	2.59936	0.00933969	0.135504	547.738	642.117	554.794	355.562	423.872
Arhgdib	2063.15	0.514087	0.197879	2.59799	0.00937708	0.135893	2037.29	2549.74	2444.25	1866.95	1417.54
Rbm33	257.482	-0.669291	0.257652	-2.59766	0.00938626	0.135893	203.233	206.904	214.941	309.489	352.841
Mfsd3	272.798	0.661916	0.255038	2.59536	0.0094491	0.136581	296.175	315.708	347.731	201.318	203.057
Trpc6	299.07	-0.904937	0.348697	-2.5952	0.00945366	0.136581	151.186	205.121	308.344	501.793	328.906
Pear1	636.053	0.555159	0.213968	2.59459	0.00947039	0.13668	826.564	631.415	730.348	487.771	504.169
Ltn1	694.907	-0.712565	0.274899	-2.5921	0.00953913	0.137527	648.115	412.917	600.933	713.127	1099.44
Slmap	570.885	-0.69113	0.266756	-2.59087	0.00957331	0.137876	430.012	494.965	450.137	545.863	933.446
Pfkl	1684.22	-0.593129	0.229022	-2.58984	0.00960213	0.138146	1239.23	1358.26	1600.24	2568.06	1655.34
Sh3yl1	120.359	0.922209	0.356359	2.58787	0.00965723	0.138794	131.358	146.26	167.676	73.1156	83.3847
Ltbp3	4845.35	-0.394807	0.152644	-2.58645	0.00969692	0.139073	4147.69	4202.3	4561.02	5381.51	5934.21
Rpain	596.146	0.675669	0.261224	2.58655	0.0096941	0.139073	622.092	717.923	761.857	546.864	331.995
Dhx30	1224.16	-0.431141	0.166946	-2.58253	0.00980798	0.14052	1100.43	1063.06	1060.07	1447.29	1449.97
Pcx	272.563	-0.76936	0.298184	-2.58015	0.00987583	0.141345	185.884	180.15	272.333	324.513	399.938
Usp11	726.546	-0.577329	0.223811	-2.57954	0.00989316	0.141445	503.126	701.87	615.563	829.311	982.859
Otud4	492.098	-0.846485	0.328358	-2.57794	0.00993923	0.141957	504.365	365.65	249.826	506.801	833.847
Slc2a12	456.382	-0.685746	0.266163	-2.57642	0.009983	0.142286	442.404	277.359	382.617	534.845	644.688
Zfp874b	146.516	1.01798	0.395082	2.57662	0.00997703	0.142286	236.692	199.77	114.785	87.1377	94.1939
Mdfi	59.9371	1.47744	0.57361	2.57569	0.010004	0.142389	125.162	69.5627	47.2644	26.0412	31.6553
Vash1	147.152	1.03367	0.401355	2.57545	0.0100109	0.142389	267.673	130.207	157.548	86.1361	94.1939
Slc25a13	407.011	-0.702681	0.273111	-2.57288	0.0100856	0.143155	371.768	257.739	347.731	441.698	616.121
Tmem44	299.96	-0.710095	0.275988	-2.57292	0.0100844	0.143155	250.324	186.392	281.336	392.621	389.129
Arhgap31	1909.23	-0.766412	0.297961	-2.57219	0.0101057	0.143293	2184.76	979.229	1311.03	2160.41	2910.74
Ubtd2	1682.07	-0.494533	0.192357	-2.57092	0.010143	0.143673	1639.5	1494.71	1202.99	1993.15	2079.99
Pcdhga9	36.2885	-1.69189	0.658868	-2.56787	0.0102325	0.144792	22.3061	19.6202	15.7548	38.0602	85.701
Tcf7l2	2820.27	0.443944	0.17306	2.56526	0.0103099	0.145738	3568.97	3088.41	2806.61	2285.61	2351.76
Praf2	1624.95	0.477087	0.186015	2.56478	0.0103241	0.145788	1671.72	1706.07	2115.65	1358.15	1273.16
Fam110a	108.825	1.26858	0.49471	2.56428	0.010339	0.145849	102.856	203.337	119.286	83.1314	35.5157
Dusp10	81.3626	-1.17781	0.459477	-2.56337	0.0103663	0.146084	75.5928	41.0242	46.1391	108.171	135.886
Dhx15	1435.96	-0.440815	0.172004	-2.56282	0.0103826	0.146165	1323.49	1225.37	1221	1595.52	1814.39
Adarb2	4.25679	-5.74853	2.2437	-2.56207	0.010405	0.146329	0	0	0	12.019	9.26497
Lrch3	1081.26	-0.496112	0.193732	-2.56082	0.0104426	0.146409	1037.23	871.317	878.893	1195.89	1422.95
Rbm39	3367.55	0.422815	0.16507	2.56142	0.0104244	0.146409	3796.99	3478.13	3971.34	2577.07	3014.2
Wnt4	1965.56	0.575231	0.224626	2.56084	0.0104418	0.146409	2064.55	2465.02	2258.56	1869.96	1169.7
Tnip1	1353.61	0.512805	0.200348	2.55957	0.0104801	0.146786	1259.05	1687.34	1665.51	1120.77	1035.36
Tlx1	7.91445	-4.17899	1.63366	-2.55806	0.0105258	0.147275	0	1.78366	1.12534	5.00792	31.6553
Efemp1	5701.62	-0.571741	0.223543	-2.55764	0.0105386	0.147305	3426.46	5422.32	5469.17	7649.09	6541.07
Gfra1	739.177	-0.551567	0.215898	-2.55476	0.0106262	0.148379	602.264	665.305	602.059	776.227	1050.03
1500032L24Rik	1200.46	0.447924	0.175502	2.55225	0.0107029	0.149298	1268.97	1420.68	1341.41	1031.63	939.622
Mtmr3	1169.77	-0.603334	0.23648	-2.55131	0.0107318	0.149514	1114.06	844.562	948.664	1158.83	1782.73
Trove2	771.425	-0.494131	0.193698	-2.55104	0.0107401	0.149514	628.288	717.031	643.696	881.393	986.719
Frs2	913.332	-0.740414	0.290454	-2.54916	0.0107982	0.150019	939.334	639.442	582.928	872.379	1532.58
Mmp23	5346.64	0.417535	0.163775	2.54945	0.0107894	0.150019	5697.96	6164.32	5968.82	4912.76	3989.34
Speer4a	33.8736	-1.7855	0.700584	-2.54859	0.0108161	0.150115	13.6315	9.81012	28.1336	49.0776	68.7152
Chrdl1	53251.5	-0.581863	0.228416	-2.54739	0.0108533	0.150328	36926.5	48156.1	48189.5	49959	83026.5
Nod1	1076.9	0.495412	0.194476	2.54742	0.0108524	0.150328	1244.18	1152.24	1260.38	757.197	970.506
Rab3d	1065.51	0.452305	0.177647	2.54609	0.0108938	0.150738	1122.74	1212	1246.88	907.434	838.48
Amot	208.748	-0.848522	0.333386	-2.54516	0.0109227	0.150986	198.276	123.964	153.047	233.369	335.083
Baz1a	306.705	0.63308	0.248888	2.54364	0.0109704	0.151204	354.419	390.621	327.475	219.347	241.661
Ddx3x	4869.87	-0.373564	0.14684	-2.54401	0.0109587	0.151204	4407.93	4395.83	4261.68	5414.56	5869.36
Mr1	1083.96	-0.466362	0.183372	-2.54326	0.0109824	0.151204	840.195	971.202	1009.43	1281.02	1317.94
Slc2a13	800.039	-0.768112	0.302002	-2.5434	0.0109779	0.151204	918.267	466.427	489.524	1177.86	948.115
9130024F11Rik	120.328	-1.00435	0.395031	-2.54245	0.0110079	0.15129	79.3105	88.2911	90.0275	123.195	220.815
Rps16	1577.19	0.66928	0.263252	2.54236	0.0110107	0.15129	2506.95	1586.56	1462.95	1355.14	974.366
Rpl23a	3300.12	0.494462	0.194618	2.54068	0.0110636	0.151866	4464.93	3312.25	3423.29	2876.55	2423.56
Eml2	234.078	0.708521	0.278998	2.53952	0.0111004	0.152219	319.72	249.712	262.205	164.26	174.49
Irf2bp2	5853.34	-0.387649	0.15283	-2.53647	0.0111977	0.152488	5591.39	4802.5	5239.6	6734.64	6898.54
Nin	240.981	-0.6919	0.272733	-2.53691	0.0111835	0.152488	206.951	189.068	184.556	278.44	345.892
Pebp1	3822.01	0.409895	0.161598	2.53651	0.0111963	0.152488	4260.46	4229.95	4233.54	3498.53	2887.58
Pknox2	2262.51	-0.448972	0.176992	-2.53667	0.0111911	0.152488	1734.92	1955.78	2231.56	2734.32	2655.96
Rasl11a	1254.82	0.734162	0.289404	2.5368	0.011187	0.152488	1198.33	2198.36	1081.46	913.444	882.488
Rnase4	5143.22	0.427936	0.16871	2.53652	0.0111961	0.152488	5126.68	6107.25	5959.82	4613.29	3909.05
Supt3h	114.699	0.92986	0.366451	2.53747	0.0111656	0.152488	127.64	142.693	154.172	84.133	64.8548
Gpc4	4841.27	-0.449644	0.177353	-2.5353	0.0112351	0.152846	3637.13	4224.6	4808.59	5463.64	6072.42
Cenpa	58.0404	1.26599	0.499562	2.5342	0.0112704	0.153175	90.4635	66.8872	69.7713	36.057	27.0228
H2-Q10	6036.05	0.40408	0.159523	2.53305	0.0113076	0.153529	5965.64	7259.49	6843.21	5091.05	5020.84
Tfpi	2161.15	-0.450928	0.178142	-2.53128	0.0113647	0.154153	1774.57	1713.2	2166.29	2569.06	2582.61
Evc	601.096	-0.570647	0.225564	-2.52986	0.0114107	0.154624	438.686	510.126	561.546	662.046	833.075
Cenpi	34.3545	1.73116	0.684871	2.52772	0.0114806	0.155385	55.7652	57.0771	30.3843	10.0158	18.5299
Foxj3	804.306	-0.575776	0.227809	-2.52745	0.0114895	0.155385	691.488	584.148	742.727	837.323	1165.84
Aspn	115.658	-1.04663	0.414363	-2.52589	0.0115407	0.155421	106.573	83.832	52.8911	188.298	146.695
Gm19277	101.736	1.09214	0.432363	2.52598	0.0115377	0.155421	121.444	164.988	101.281	46.0728	74.8918
Mark1	1832.06	0.520927	0.206249	2.52572	0.0115463	0.155421	1720.05	2530.12	2003.11	1503.38	1403.64
Vasn	3295.52	0.507383	0.200863	2.52601	0.0115365	0.155421	4531.85	3077.7	3607.85	2776.39	2483.78
Xpo5	649.777	-0.60756	0.240557	-2.52564	0.0115486	0.155421	660.508	449.482	503.028	737.165	898.702
Zfyve26	139.404	-0.991344	0.392655	-2.52472	0.0115789	0.155676	128.88	74.9137	96.7795	153.242	243.205
Nrip1	1260.29	0.679891	0.269452	2.52323	0.0116281	0.156184	1050.86	1994.13	1404.43	811.282	1040.77
Rpl31	1391.88	0.557545	0.220998	2.52285	0.0116407	0.156201	2002.59	1409.98	1377.42	1161.84	1007.57
Ccdc93	243.295	-0.787812	0.312341	-2.52228	0.0116596	0.156302	214.386	168.556	183.431	249.394	400.71
Sec61b	1996.24	0.434493	0.172327	2.52133	0.0116912	0.156573	2329.75	1978.97	2375.6	1698.68	1598.21
Wdr72	339.18	-1.17843	0.467463	-2.52091	0.0117052	0.156609	123.923	189.96	362.361	268.424	751.235
Rpl4	4367.33	0.404263	0.160403	2.5203	0.0117256	0.156728	5041.17	4625.03	4854.73	3970.28	3345.43
Spnb1	18.5028	-2.77158	1.09994	-2.51975	0.011744	0.156822	12.3923	4.45915	0	37.0586	38.604
2810407C02Rik	866.203	0.503466	0.199837	2.51939	0.0117559	0.156823	1085.56	863.291	997.054	731.156	653.952
Dmpk	732.731	-0.584379	0.231983	-2.51906	0.0117668	0.156823	479.581	616.254	735.975	908.436	923.409
Pde5a	349.276	0.773417	0.307266	2.5171	0.0118326	0.157547	467.188	473.561	316.221	188.298	301.112
Fat4	419.204	-0.864747	0.343648	-2.51638	0.0118569	0.157717	452.318	230.092	265.581	427.676	720.351
H2-T23	5582.94	-0.610566	0.242675	-2.51598	0.0118703	0.157743	3311.21	5239.5	5281.24	8336.18	5746.6
Cd300lg	263.782	0.817586	0.325063	2.51516	0.0118978	0.157956	304.85	396.864	254.328	222.351	140.519
Mad2l1bp	467.325	0.527748	0.209957	2.51361	0.0119504	0.158349	527.91	535.098	534.538	381.603	357.473
Ndel1	2340	0.424144	0.168726	2.5138	0.0119438	0.158349	2309.92	2773.59	2732.33	1940.07	1944.1
P2rx2	670.443	-0.629885	0.25063	-2.5132	0.011964	0.158376	417.619	691.168	540.165	812.284	890.981
Abca1	1147.19	0.599904	0.238982	2.51024	0.0120648	0.159557	1581.25	1441.2	961.043	912.442	840.024
Aplp2	22901.5	-0.470732	0.18759	-2.50937	0.0120947	0.159799	16200.4	21203.2	22115.2	24989.5	29999.2
Smarcd3	605.416	0.518149	0.206747	2.5062	0.0122038	0.161086	659.268	753.596	652.699	452.716	508.801
Spon2	2044.8	-0.678493	0.270802	-2.50549	0.0122282	0.161252	1233.03	1573.19	2139.28	3274.18	2004.32
Gfod2	592.402	0.740328	0.295708	2.50358	0.0122945	0.161353	577.479	585.932	953.166	508.804	336.627
L3mbtl3	200.51	-0.869315	0.347152	-2.50413	0.0122753	0.161353	210.668	119.505	122.662	259.41	290.302
Mtmr14	546.131	0.580832	0.231992	2.50367	0.0122913	0.161353	577.479	636.766	675.206	355.562	485.639
Phlda1	413.236	-0.707438	0.282457	-2.50458	0.0122595	0.161353	351.94	231.876	406.249	551.872	524.243
Plcb1	284.897	-0.70658	0.282188	-2.50393	0.0122822	0.161353	173.492	250.604	257.704	353.559	389.129
Ccrl1	20786.4	0.403469	0.161206	2.50281	0.0123212	0.16155	20778.1	25832.7	22491.1	16701.4	18128.5
Gzme	22.7544	2.02711	0.810329	2.50159	0.0123639	0.161801	38.416	34.7813	24.7576	5.00792	10.8091
Oas1a	512.486	-0.855459	0.341961	-2.50163	0.0123624	0.161801	229.257	532.422	398.372	850.344	552.038
Sertad1	1009.96	0.613559	0.245307	2.50119	0.0123778	0.161829	1047.15	1178.11	1290.77	955.51	578.289
D10Wsu102e	403.336	0.618541	0.247349	2.50068	0.0123955	0.161906	514.279	397.756	494.026	336.532	274.089
Gbf1	1616.61	-0.473865	0.189531	-2.5002	0.0124123	0.161909	1593.65	1282.45	1322.28	1773.8	2110.87
Ifi27l2a	55.8586	-1.38601	0.554402	-2.5	0.0124192	0.161909	19.8276	45.4833	36.011	106.168	71.8035
Elovl1	3797.9	0.368919	0.147607	2.49933	0.0124428	0.16191	4228.24	4140.76	4154.77	3337.27	3128.47
Rps5	2428.06	0.642592	0.257087	2.49951	0.0124365	0.16191	3492.14	2398.13	2616.42	2305.64	1327.98
Ubtd1	552.86	0.58049	0.232384	2.49798	0.0124903	0.162374	651.833	696.519	562.672	485.768	367.51
Sfrp2	2388.75	-0.585359	0.234508	-2.49612	0.012556	0.163074	1672.96	1634.72	2663.69	3040.81	2931.59
Dhcr7	205.185	-0.860761	0.344887	-2.49578	0.0125682	0.163078	208.19	137.342	119.286	238.377	322.73
Hmgcll1	1629.34	0.530791	0.212741	2.49501	0.0125953	0.163122	1612.23	2187.66	1774.67	1106.75	1465.41
Setdb2	171.145	-1.10713	0.443702	-2.49521	0.0125882	0.163122	190.841	93.6421	67.5206	210.332	293.391
Adck3	285.559	0.652535	0.261675	2.49368	0.0126425	0.163426	316.003	354.948	331.976	186.294	238.573
Atp5k	511.231	0.511999	0.205308	2.49381	0.0126379	0.163426	570.044	566.312	605.435	413.654	400.71
Dcun1d3	880.22	0.506351	0.203145	2.49255	0.0126828	0.163767	883.568	1156.7	954.291	710.122	696.417
Enox2	246.996	0.676619	0.271522	2.49195	0.0127044	0.163767	272.63	277.359	321.848	166.263	196.881
Lrrc59	4940.21	0.370645	0.148737	2.49194	0.0127046	0.163767	5530.67	5444.62	5321.75	4416.98	3987.03
Asns	290.099	0.753621	0.302634	2.4902	0.012767	0.164416	375.486	333.544	329.726	260.412	151.328
Plekha8	402.552	-0.6303	0.253249	-2.48885	0.0128156	0.164889	400.27	301.438	289.213	550.871	470.969
Sfxn3	1181.31	0.42769	0.171944	2.48738	0.0128687	0.165417	1327.21	1343.1	1278.39	1023.62	934.218
Trim34a	407.381	-0.706749	0.284225	-2.48658	0.0128976	0.165634	235.453	324.626	415.252	491.777	569.796
Tor3a	3049.49	-0.458511	0.184422	-2.4862	0.0129115	0.165657	2276.46	2731.67	2948.4	3963.26	3327.67
Rpl18	2551.26	0.564904	0.227362	2.4846	0.0129695	0.166092	3365.74	2611.28	2815.61	2431.84	1531.81
Smarca2	1346.28	-0.492782	0.198312	-2.48488	0.0129596	0.166092	1086.8	1291.37	1094.96	1422.25	1836.01
Cdc42se1	1275.33	0.481361	0.1938	2.48381	0.0129987	0.166156	1568.86	1373.42	1372.92	1155.83	905.651
Oat	19201.9	0.359517	0.144739	2.4839	0.0129952	0.166156	19981.3	22566	20632	16410.9	16419.1
Golt1b	2816.7	0.510006	0.205385	2.48317	0.0130219	0.166298	3937.02	2729	2927.02	2412.81	2077.67
Smyd2	880.597	0.467666	0.188361	2.48282	0.0130348	0.166309	948.008	975.661	1046.57	767.213	665.534
Col11a1	599.859	-0.750105	0.302496	-2.47972	0.0131485	0.167448	521.714	492.29	400.622	523.828	1060.84
D5Ertd579e	300.921	-0.681684	0.274872	-2.48	0.0131381	0.167448	240.41	292.52	193.559	393.622	384.496
Agpat4	521.342	0.577149	0.232897	2.47812	0.0132075	0.167679	525.432	639.442	635.819	454.719	351.297
Cecr2	4.39607	5.50317	2.22072	2.4781	0.0132084	0.167679	7.43536	8.91829	5.62672	0	0
Manf	3610.03	0.400685	0.16174	2.47734	0.0132365	0.167679	4039.88	3693.96	4259.42	3214.08	2842.8
Plscr3	2814.42	0.425743	0.171843	2.47751	0.0132302	0.167679	3431.42	2850.29	3122.83	2504.96	2162.6
Taok2	774.511	-0.575778	0.232426	-2.47725	0.0132397	0.167679	803.019	604.66	535.663	905.431	1023.78
Uba52	2616.95	0.521565	0.210418	2.47871	0.0131859	0.167679	3593.76	2758.43	2582.66	2351.72	1798.18
Ston1	422.181	0.722109	0.291558	2.47672	0.0132594	0.167774	515.518	623.389	364.611	258.408	348.981
BC056474	1258.45	0.509737	0.206127	2.47293	0.013401	0.169254	1602.32	1310.99	1371.79	1147.81	859.326
Rpl22	814.232	0.558544	0.225855	2.47303	0.0133974	0.169254	1127.7	810.673	864.264	694.097	574.428
Hk2	110.585	1.01001	0.408656	2.47155	0.013453	0.169377	141.272	100.777	173.303	78.1235	59.4502
Pcdhga10	102.444	-0.960296	0.38857	-2.47136	0.01346	0.169377	84.2674	80.2646	58.5179	133.211	155.96
Ptafr	6.0095	-6.24312	2.52531	-2.47221	0.0134279	0.169377	0	0	0	30.0475	0
Vrk3	769.578	0.476195	0.192681	2.47141	0.0134581	0.169377	791.866	934.637	874.392	616.975	630.018
Kif5c	5.86781	-6.21642	2.51637	-2.47039	0.0134964	0.16968	0	0	0	0	29.3391
Dact1	3658.15	0.520621	0.211029	2.46706	0.0136227	0.1708	3490.9	5234.15	3762.02	2685.24	3118.43
Gnai2	11853.6	0.377274	0.152924	2.46707	0.0136223	0.1708	13300.6	12478.5	13386	10850.1	9252.62
Tpx2	53.0896	-1.45593	0.589994	-2.46769	0.0135986	0.1708	26.0238	24.9712	42.763	119.188	52.5015
Pxmp2	48.5087	1.41794	0.574851	2.46662	0.0136395	0.170854	54.526	90.9666	48.3898	27.0427	21.6183
Epsti1	33.1118	-1.56462	0.634485	-2.46597	0.0136642	0.171008	17.3492	16.9448	21.3815	65.1029	44.7807
3110070M22Rik	36.5699	1.79738	0.729007	2.46551	0.0136817	0.171071	19.8276	61.5362	72.022	14.0222	15.4416
6720456H20Rik	1108.35	-0.641196	0.260285	-2.46344	0.013761	0.171129	1040.95	832.077	845.133	1014.6	1808.99
A430107O13Rik	2278.43	-0.38814	0.157502	-2.46435	0.0137261	0.171129	1972.85	2135.93	1974.98	2579.08	2729.31
Atxn1	422.422	0.769618	0.312376	2.46375	0.0137491	0.171129	700.163	417.376	401.748	245.388	347.436
B4galt5	621.191	0.750103	0.304436	2.46391	0.013743	0.171129	961.64	498.533	764.108	528.836	352.841
Cltb	1015.18	0.438054	0.177741	2.46456	0.0137181	0.171129	1081.84	1133.52	1186.11	868.373	806.052
Ric3	237.424	-0.760064	0.308412	-2.46444	0.0137226	0.171129	187.123	186.392	184.556	238.377	390.673
B630019K06Rik	250.427	-0.693595	0.281624	-2.46284	0.0137843	0.171264	174.731	242.578	184.556	317.502	332.767
Acox1	2623.96	0.446607	0.1818	2.45659	0.0140264	0.173801	2659.38	3367.55	2782.97	2002.16	2307.75
Atp5sl	257.906	0.633012	0.257612	2.45723	0.0140014	0.173801	281.304	308.573	311.72	200.317	187.616
Slc1a5	10254.1	0.576915	0.234821	2.45683	0.0140168	0.173801	10342.6	15310	9781.48	6538.33	9298.17
Plxna3	86.344	-1.46508	0.596998	-2.45407	0.014125	0.174865	71.8751	17.8366	63.0192	92.1456	186.844
Nol3	564.629	0.545266	0.222256	2.45332	0.0141543	0.175071	566.326	619.821	751.729	436.69	448.579
Mmp17	454.696	-0.584962	0.238504	-2.45263	0.0141815	0.17525	340.787	341.571	454.639	555.879	580.605
Col6a6	8.47834	-3.74635	1.52773	-2.45223	0.0141976	0.17529	0	0.891829	3.37603	8.01266	30.1112
2022-03-02	1078.66	0.450476	0.183784	2.45111	0.0142417	0.175677	1171.07	1217.35	1235.63	965.526	803.736
Akr1b8	645.836	0.526827	0.214972	2.45068	0.0142588	0.175731	809.215	627.848	770.86	534.845	486.411
Agt	42427	0.408364	0.166679	2.45001	0.0142854	0.175771	40870.9	50854.8	49478	37866.9	33064.4
Ppm1l	236.645	-0.725794	0.296287	-2.44963	0.0143004	0.175771	235.453	170.339	157.548	299.473	320.414
Strn	589.669	-0.675125	0.275581	-2.44982	0.0142928	0.175771	627.049	435.213	366.862	656.037	863.186
Cox4i1	4495.2	0.432092	0.176554	2.44737	0.0143903	0.176223	5213.43	4926.47	4902	4237.7	3196.41
Gm19757	204.681	0.68848	0.281307	2.44743	0.0143879	0.176223	229.257	247.929	246.45	159.252	140.519
Itih5	3210	0.493851	0.201715	2.44826	0.0143546	0.176223	3181.09	4507.31	3203.85	2507.96	2649.78
Ndufb7	919.887	0.529259	0.216225	2.44772	0.0143765	0.176223	1184.7	903.423	1057.82	817.292	636.195
Smad5	861.322	-0.560916	0.229217	-2.4471	0.0144013	0.176223	891.004	659.062	622.315	964.525	1169.7
Alg3	903.945	0.491507	0.201029	2.44495	0.0144871	0.176706	1151.24	931.07	983.55	785.241	668.622
Camk4	167.063	-0.826709	0.33809	-2.44523	0.0144758	0.176706	128.88	102.56	151.921	193.306	258.647
Nme1	1330.94	0.457388	0.187108	2.44451	0.014505	0.176706	1575.06	1341.31	1563.1	1183.87	991.352
Relb	1283.74	0.505103	0.206525	2.44573	0.014456	0.176706	1612.23	1385.9	1368.42	1185.87	866.275
Zbtb42	55.9335	1.74361	0.713266	2.44454	0.0145035	0.176706	122.683	56.1853	54.0165	39.0617	7.72081
Ap1s1	2473.36	0.455697	0.186444	2.44415	0.0145194	0.176726	2432.6	3013.49	2874.13	2244.55	1802.04
Herc1	433.547	-0.708234	0.289898	-2.44305	0.0145639	0.17711	421.337	324.626	292.589	429.679	699.505
Usp46	630.933	-0.509745	0.208681	-2.4427	0.0145779	0.177124	596.068	539.557	482.772	811.282	724.984
Mrps28	843.449	0.502809	0.205949	2.44142	0.0146294	0.177593	1029.8	872.209	965.545	755.194	594.502
Impa2	94.7679	1.00925	0.413649	2.43987	0.0146926	0.178203	107.813	101.669	146.295	67.1061	50.9573
Hs6st2	65.1734	-1.50815	0.618631	-2.43789	0.0147734	0.179025	24.7845	29.4304	58.5179	54.0855	159.049
4833412C05Rik	5.7134	-6.17798	2.53464	-2.43741	0.0147927	0.179101	0	0	0	0	28.567
Fuca2	4450.85	-0.379841	0.155908	-2.43631	0.0148378	0.179489	3653.24	4150.57	4112	5375.5	4962.94
Arfgef2	776.414	-0.7065	0.290137	-2.43506	0.0148894	0.179797	835.239	523.504	501.903	782.236	1239.19
Fbxw9	280.657	0.618509	0.254	2.43508	0.0148887	0.179797	304.85	319.275	354.483	202.32	222.359
Cox6a1	3489.52	0.433103	0.177956	2.43376	0.0149428	0.179811	3939.5	3693.07	4046.73	3272.17	2496.14
Dlg3	1142.14	-0.411589	0.169096	-2.43405	0.014931	0.179811	996.338	1008.66	1021.81	1318.08	1365.81
Nr1h3	970.467	0.645968	0.265404	2.4339	0.014937	0.179811	1007.49	1323.47	1070.2	928.468	522.699
Ppp3ca	1440.34	-0.406645	0.16703	-2.43456	0.0149097	0.179811	1245.42	1281.56	1296.4	1602.53	1775.79
Lsm4	742.497	0.487436	0.200378	2.43259	0.0149914	0.180081	917.027	787.485	811.373	643.016	553.582
Supt6h	520.392	-0.756939	0.31114	-2.43279	0.014983	0.180081	542.781	405.782	275.709	553.875	823.81
Dock2	36.7564	-2.0766	0.854024	-2.43155	0.0150345	0.180441	4.95691	6.24281	37.1363	62.0982	73.3477
Rps20	1915.9	0.600874	0.247269	2.43004	0.015097	0.181033	2913.42	1846.98	1893.95	1693.68	1231.47
Plxnd1	1931.89	-0.789067	0.324837	-2.42912	0.0151356	0.181337	2240.52	1160.27	1089.33	1840.91	3328.44
Osgepl1	361.215	-0.590847	0.243275	-2.42873	0.015152	0.181376	255.281	333.544	311.72	457.723	447.807
Ppp1r15b	2382.84	-0.462333	0.190497	-2.42699	0.0152249	0.182082	2287.61	1695.37	2228.18	2953.67	2749.38
Tmem98	2705.07	0.461938	0.190358	2.42669	0.0152375	0.182082	3058.41	3059.87	2994.54	2578.07	1834.46
Sp110	863.279	-0.633045	0.260989	-2.42557	0.0152845	0.182485	525.432	774.108	821.501	1302.06	893.298
Pcm1	390.045	-0.656446	0.270833	-2.4238	0.0153591	0.183217	408.945	282.71	259.954	506.801	491.816
D4Bwg0951e	154.278	-1.19447	0.493091	-2.4224	0.0154182	0.183763	42.1337	114.154	148.545	297.47	169.086
S1pr3	33825	0.392755	0.162169	2.42189	0.0154402	0.183865	36911.6	33281.3	41975.3	29575.7	27381.1
A930038C07Rik	755.731	-0.632271	0.261143	-2.42117	0.0154706	0.184068	539.063	610.903	708.966	719.137	1200.59
Zfp317	427.953	-0.657028	0.271541	-2.41962	0.0155365	0.184693	423.815	367.434	252.077	542.858	553.582
Lpcat3	3085.13	0.411418	0.17013	2.41825	0.0155954	0.184813	3415.31	3786.71	3072.19	2706.28	2445.18
Mia3	2333.96	-0.512132	0.211742	-2.41866	0.0155778	0.184813	1941.87	2076.18	1964.85	2229.52	3457.38
Ndrg4	84.5912	1.11185	0.459659	2.41885	0.0155697	0.184813	123.923	95.4257	103.532	66.1045	33.9716
Nisch	4848.55	-0.420025	0.173698	-2.41813	0.0156004	0.184813	4816.87	3737.66	4260.55	5391.52	6036.13
Kif1a	15.3398	3.02827	1.25297	2.41688	0.0156541	0.18513	34.6983	25.8631	10.1281	6.0095	0
Mpnd	1178.83	0.495729	0.205106	2.41694	0.0156514	0.18513	1125.22	1429.6	1446.07	1041.65	851.605
Cntn1	431.731	-0.53684	0.222414	-2.41369	0.0157917	0.186597	381.682	387.946	327.475	538.852	522.699
6430527G18Rik	2493.72	0.519343	0.215238	2.41287	0.0158274	0.186859	3272.8	3115.16	2122.4	1923.04	2035.21
Vps37a	663.669	-0.510009	0.211462	-2.41183	0.0158726	0.187232	644.398	565.42	492.9	780.233	835.391
Pmp22	5749.81	0.441098	0.182935	2.41122	0.015899	0.187383	5794.62	7619.79	5865.29	4995.9	4473.44
Kcnab3	24.5221	-1.90104	0.788902	-2.40973	0.0159642	0.18799	6.19613	9.81012	19.1308	38.0602	49.4132
Ptp4a3	1771.5	0.493526	0.20487	2.40897	0.0159976	0.188028	2110.4	2139.5	1760.04	1651.61	1195.95
Tyms	353.453	0.622321	0.258297	2.40932	0.0159823	0.188028	490.734	383.487	358.985	285.451	248.61
Vcl	5062.86	-0.532294	0.220986	-2.40872	0.0160085	0.188028	4810.68	3767.98	4311.19	4788.57	7635.88
D230025D16Rik	1222.68	0.435702	0.181051	2.40651	0.0161058	0.188367	1418.91	1373.42	1302.02	1098.74	920.32
Gpm6a	339.079	-0.760744	0.316045	-2.40707	0.0160809	0.188367	188.362	335.328	271.208	536.849	363.65
Hcfc1r1	723.291	0.612663	0.254586	2.40651	0.0161058	0.188367	933.137	816.916	767.484	685.083	413.835
Wdr45	698.036	0.550818	0.22879	2.40753	0.0160607	0.188367	768.32	848.13	780.988	648.024	444.719
Zfp46	817.684	-0.442853	0.183988	-2.40697	0.0160856	0.188367	687.771	705.437	751.729	947.498	995.984
Aig1	1818.36	0.41501	0.172511	2.4057	0.0161415	0.188463	1954.26	2043.18	2062.75	1659.62	1371.99
Camk2n1	512.538	0.571984	0.237754	2.40578	0.0161382	0.188463	692.728	584.148	492.9	370.586	422.328
5430403N17	72.3284	-1.09586	0.455762	-2.40446	0.0161966	0.188851	47.0906	62.4281	39.387	96.152	116.584
Gm12070	5597.57	0.480329	0.199777	2.40433	0.0162021	0.188851	6992.95	5725.54	6218.65	5352.46	3698.27
Cmya5	26.5753	-2.24635	0.934615	-2.4035	0.0162388	0.189079	4.95691	13.3774	13.5041	13.0206	88.0172
Sun2	249.815	1.13857	0.473758	2.40327	0.0162492	0.189079	584.915	164.988	209.314	136.215	153.644
1700029F09Rik	147.529	0.87082	0.36254	2.402	0.0163057	0.189576	203.233	188.176	149.671	76.1203	120.445
Tmem42	174.798	0.781225	0.325286	2.40166	0.0163211	0.189595	166.056	250.604	212.69	124.196	120.445
Fzd7	2709.54	0.466397	0.194299	2.40041	0.0163769	0.18961	3604.91	2749.51	2785.22	1999.16	2408.89
Rpl22l1	1120.31	0.480822	0.200288	2.40065	0.0163659	0.18961	1493.27	1164.73	1133.22	905.431	904.879
Tm4sf1	3465.18	-0.375724	0.156526	-2.40039	0.0163775	0.18961	2907.22	3231.99	3149.84	4219.67	3817.17
Zfp407	170.892	-0.791097	0.329458	-2.40121	0.0163411	0.18961	106.573	138.234	151.921	198.313	259.419
Npm1	2386.91	0.4103	0.170986	2.3996	0.0164128	0.189859	2728.78	2635.36	2582.66	2203.48	1784.28
Car1	260.89	1.15935	0.483233	2.39915	0.0164331	0.189933	539.063	222.066	243.074	225.356	74.8918
Hif1an	533.662	-0.69808	0.29105	-2.39848	0.0164631	0.18996	550.216	390.621	342.104	536.849	848.517
Tgfbr2	3481.37	-0.420885	0.175468	-2.39864	0.0164559	0.18996	3311.21	2965.33	2922.52	3624.73	4583.07
Diap1	162.686	0.78239	0.326258	2.39807	0.0164817	0.190016	172.252	181.933	231.821	123.195	104.231
Btbd3	257.853	-0.698131	0.291186	-2.39754	0.0165055	0.190131	197.037	203.337	219.442	266.421	403.026
Bicc1	5674.23	0.346561	0.144595	2.39677	0.0165403	0.190373	6234.55	6382.82	5994.7	4979.87	4779.18
Fam20c	445.941	-0.708246	0.295588	-2.39606	0.0165725	0.190584	303.61	361.191	402.873	414.655	747.374
Ppia	25535.2	0.35684	0.148989	2.39507	0.016617	0.190936	28732.7	28006.1	27225.4	23523.2	20188.4
Serpinb6a	1893.83	0.421601	0.176106	2.39401	0.0166651	0.191328	2131.47	2259.9	1929.96	1701.69	1446.11
9130014G24Rik	8.36034	-3.39397	1.41842	-2.39279	0.0167209	0.191486	0	1.78366	3.37603	15.0237	21.6183
Ezh2	225.411	0.807293	0.337428	2.39249	0.0167345	0.191486	261.477	321.95	231.821	198.313	113.496
Gm5595	142.081	-0.929201	0.388318	-2.39289	0.0167164	0.191486	74.3536	107.02	131.665	157.249	240.117
Vcpip1	972.503	-0.456183	0.190657	-2.3927	0.0167251	0.191486	752.21	846.346	940.787	1175.86	1147.31
B3gnt2	3402.64	0.640288	0.267733	2.39152	0.0167788	0.191674	2655.66	5476.72	3783.4	2298.63	2798.79
Spg11	296.573	-0.626803	0.262075	-2.39169	0.0167708	0.191674	251.563	248.82	230.695	322.51	429.277
Mbd4	199.493	-0.823617	0.344564	-2.39032	0.0168339	0.192144	130.119	189.96	137.292	207.328	332.767
Arpc1b	7347.77	0.439967	0.184376	2.38625	0.0170211	0.19233	6686.87	8795.22	9150.17	6315.98	5790.61
Chdh	7.12004	-3.91664	1.64109	-2.38661	0.0170045	0.19233	1.23923	0.891829	1.12534	3.00475	29.3391
Dmxl1	276.056	-0.826388	0.346221	-2.38688	0.016992	0.19233	270.151	185.501	177.804	260.412	486.411
Gm20324	4.23319	5.45272	2.28448	2.38685	0.0169934	0.19233	6.19613	11.5938	3.37603	0	0
Htra1	13941.4	-0.541206	0.226719	-2.38712	0.0169812	0.19233	9383.42	11803.4	14194	20537.5	13788.6
Mcc	350.325	-0.841865	0.352765	-2.38648	0.0170108	0.19233	369.289	219.39	210.439	332.526	619.981
Mcpt8	5.60887	-6.1435	2.5725	-2.38814	0.0169339	0.19233	0	0	0	28.0443	0
Otub1	1355.06	0.459448	0.192312	2.38907	0.016891	0.19233	1660.56	1501.84	1399.93	1233.95	978.999
Pfkfb3	543.112	0.543459	0.227717	2.38656	0.0170068	0.19233	696.445	564.528	602.059	475.752	376.775
Prpf6	1146.9	-0.440403	0.184314	-2.38941	0.0168753	0.19233	887.286	1064.84	1057.82	1401.21	1323.35
Rhobtb3	736.699	-0.472568	0.198057	-2.38602	0.017032	0.19233	669.182	673.331	570.549	923.46	846.973
Sox13	136.913	0.784672	0.328687	2.38729	0.0169731	0.19233	164.817	154.286	174.428	99.1567	91.8776
Zfp26	404.126	-0.737398	0.308705	-2.38868	0.0169089	0.19233	417.619	282.71	257.704	408.646	653.952
Erbb2ip	928.315	-0.641167	0.268855	-2.38481	0.017088	0.192331	846.392	748.245	681.958	829.311	1535.67
Kdelr1	4409.46	0.499982	0.209596	2.38546	0.0170577	0.192331	6016.44	4145.22	4822.1	4005.33	3058.21
Selm	2724.29	0.438841	0.183998	2.38503	0.0170779	0.192331	3021.23	2869.91	3238.74	2559.04	1932.52
Setd2	439.424	-0.87496	0.36683	-2.38519	0.0170701	0.192331	350.701	448.59	189.058	436.69	772.081
Rps7	2951.13	0.528052	0.221481	2.38419	0.0171168	0.192498	4127.86	3016.17	2946.15	2718.3	1947.19
Kdm4b	1037.6	-0.473018	0.1985	-2.38296	0.0171742	0.192985	965.357	758.055	972.297	1202.9	1289.38
Rhbdd3	360.434	0.624545	0.262123	2.38264	0.0171891	0.192995	374.246	448.59	434.383	319.505	225.448
Pde4d	231.601	0.655671	0.275387	2.38091	0.0172701	0.193744	301.132	264.873	247.576	182.288	162.137
Serpina3a	4.1316	5.4091	2.27215	2.38061	0.017284	0.193744	9.91381	6.24281	4.50137	0	0
Tmem123	6273.55	0.423515	0.178015	2.3791	0.0173551	0.194383	6018.92	8028.25	6905.11	4919.78	5495.67
Gapdh	3400.91	0.462206	0.194375	2.37791	0.0174112	0.194852	4126.62	3519.16	3812.66	3239.12	2306.98
Tec	517.95	-0.598999	0.252043	-2.37658	0.0174742	0.195398	407.705	350.489	531.162	593.939	706.454
Rpl18a	4353.31	0.505753	0.212866	2.37592	0.0175051	0.19546	5514.56	4486.79	4809.72	4217.67	2737.8
Rps10	1571.54	0.589248	0.248015	2.37586	0.0175081	0.19546	2326.03	1507.19	1611.49	1426.25	986.719
Exosc6	290.352	0.691557	0.291236	2.37455	0.0175701	0.195993	277.587	330.869	418.628	239.378	185.299
Dpagt1	1620.94	0.433305	0.182565	2.37343	0.0176239	0.196434	1708.89	1938.84	1776.92	1483.34	1196.73
Pik3cd	6.41822	4.59564	1.93721	2.3723	0.0176779	0.196876	13.6315	9.81012	7.8774	0	0.772081
A230056P14Rik	331.722	-0.72414	0.305384	-2.37124	0.0177285	0.196961	219.343	226.525	343.23	512.811	356.701
Ddx58	1414.89	-0.412567	0.173987	-2.37125	0.0177282	0.196961	1218.16	1180.78	1349.29	1745.76	1580.45
Tmem9b	5080.6	0.363566	0.153319	2.37131	0.0177252	0.196961	5228.3	6007.36	5496.18	4444.02	4227.14
Gm13293	4.46056	5.52767	2.3319	2.37046	0.017766	0.197218	1.23923	9.81012	11.2534	0	0
Bmper	947.952	-0.64759	0.273256	-2.36991	0.0177926	0.197354	690.249	858.832	769.735	834.319	1586.63
Gnb2l1	2903.98	0.56231	0.237484	2.36778	0.0178951	0.198331	4277.81	2979.6	2745.84	2638.17	1878.47
Mgst3	402.287	0.661454	0.279451	2.36697	0.0179343	0.198389	475.863	491.398	446.761	376.595	220.815
Osbpl8	657.107	-0.765861	0.32353	-2.3672	0.0179232	0.198389	509.322	518.153	513.157	508.804	1236.1
Uhmk1	112.655	-1.06736	0.450974	-2.36678	0.0179436	0.198389	109.052	71.3464	55.1418	116.184	211.55
Anxa5	11206	0.348378	0.147222	2.36635	0.0179645	0.198461	11689.6	12599.8	12483.4	10146	9111.33
Pds5a	561.099	-0.670983	0.283683	-2.36525	0.0180178	0.19889	563.848	420.052	378.115	547.866	895.614
Cask	1032.76	-0.503767	0.213181	-2.3631	0.0181229	0.19989	931.898	1012.23	710.092	1200.9	1308.68
Jak1	5730.73	-0.434052	0.183822	-2.36127	0.0182127	0.200719	4642.14	4680.32	5753.88	6005.49	7571.8
Ddx42	1257.5	-0.488347	0.206994	-2.35923	0.0183129	0.201661	929.42	1008.66	1311.03	1480.34	1558.06
Ech1	3390.32	0.442311	0.187523	2.3587	0.0183391	0.201789	3676.78	4135.41	3558.34	3203.06	2378.01
Sec61g	1533.1	0.385645	0.163649	2.35654	0.0184459	0.202802	1670.48	1687.34	1717.27	1348.13	1242.28
Fam59b	10.7636	3.57458	1.51727	2.35592	0.0184767	0.202978	3.71768	17.8366	29.2589	3.00475	0
Cbx5	914.415	-0.590902	0.250868	-2.35543	0.0185014	0.203087	944.29	677.79	660.577	927.466	1361.95
Atp5g2	1973.48	0.443163	0.188197	2.35478	0.0185336	0.203165	2505.72	2125.23	1989.61	1776.81	1470.04
Wls	9990.41	-0.337885	0.143494	-2.35469	0.0185381	0.203165	8710.52	8968.24	9430.38	11746.6	11096.3
Egr3	5.6095	-4.19288	1.78137	-2.35374	0.0185855	0.2032	1.23923	0.891829	0	12.019	13.8975
Ift20	1151.6	0.481215	0.20443	2.35393	0.0185759	0.2032	1463.53	1181.67	1251.38	1047.66	813.773
Prdm16	174.943	-0.769862	0.327033	-2.35408	0.0185685	0.2032	146.229	127.532	136.167	185.293	279.493
Creb5	22.6222	-2.23855	0.951339	-2.35305	0.01862	0.203253	3.71768	4.45915	19.1308	61.0966	24.7066
Prdx1	16020.3	0.37092	0.15763	2.35311	0.0186173	0.203253	16364	18096.1	18392.6	14784.4	12464.5
1300010F03Rik	437.753	-0.894099	0.380127	-2.3521	0.0186675	0.203449	360.615	279.143	338.728	308.488	901.79
Bmx	347.313	-0.703708	0.299171	-2.35219	0.0186633	0.203449	303.61	340.679	187.932	435.689	468.653
Lrp6	990.149	-0.636719	0.270756	-2.35163	0.0186912	0.203546	996.338	609.119	827.127	975.542	1542.62
Rpl28	1374.82	0.510731	0.217233	2.35107	0.0187195	0.203585	1843.97	1329.72	1509.09	1243.97	947.343
Tmeff2	440.009	-0.664419	0.282615	-2.35097	0.0187244	0.203585	273.869	446.807	347.731	656.037	475.602
Gli2	127.318	-0.80944	0.344384	-2.3504	0.0187531	0.203737	90.4635	100.777	102.406	152.241	190.704
Jdp2	2052.59	-0.436226	0.18577	-2.34821	0.0188639	0.204746	1679.15	1670.4	2045.87	2653.19	2214.33
Nans	451.941	0.513986	0.218906	2.34797	0.0188758	0.204746	535.346	471.778	533.413	375.594	343.576
Wdr54	37.0182	1.62457	0.692091	2.34734	0.0189081	0.204934	73.1144	33.8895	45.0137	23.0364	10.0371
Prdx6	2338.9	0.39152	0.166838	2.34671	0.0189401	0.20512	2405.34	2704.03	2643.43	2110.34	1831.38
Ifit2	405.872	-0.688066	0.293356	-2.3455	0.0190016	0.20555	223.061	396.864	357.859	471.746	579.833
Scnn1a	32.2855	1.54333	0.658041	2.34534	0.0190098	0.20555	42.1337	54.4016	34.8856	13.0206	16.9858
Adcy9	417.137	-0.749903	0.319843	-2.34459	0.0190478	0.2058	477.102	238.118	268.957	591.936	509.573
Hoxc5	195.952	-0.781284	0.333377	-2.34354	0.0191016	0.205897	144.989	120.397	191.308	301.477	221.587
Slc43a2	717.837	-0.462658	0.197416	-2.34357	0.0191	0.205897	675.378	602.877	593.056	805.273	912.6
Stard4	34.2456	-1.70775	0.728638	-2.34376	0.0190902	0.205897	27.263	17.8366	9.00275	36.057	81.0685
Cpeb1	213.062	0.73146	0.31224	2.34262	0.0191489	0.205921	308.567	218.498	232.946	173.274	132.026
Tbc1d25	322.41	0.588128	0.251048	2.34269	0.0191451	0.205921	376.725	326.41	414.126	235.372	259.419
Zswim4	359.237	-0.552434	0.235785	-2.34296	0.0191316	0.205921	304.85	312.14	291.464	403.638	484.095
Mef2a	917.99	-0.435702	0.18614	-2.34072	0.0192464	0.206808	790.626	818.699	804.621	998.578	1177.42
Tspyl5	169.989	-0.93741	0.400636	-2.3398	0.019294	0.207158	73.1144	117.721	182.306	234.37	242.433
Panx1	876.686	0.520088	0.222392	2.3386	0.0193559	0.207661	857.545	1005.09	1128.72	795.257	596.819
D3Bwg0562e	27.8853	-1.77277	0.758211	-2.3381	0.0193821	0.207713	6.19613	16.9448	19.1308	60.095	37.0599
Ephb6	223.902	-0.70483	0.301476	-2.33793	0.019391	0.207713	193.319	145.368	198.06	329.521	253.243
Pvr	103.169	0.946239	0.404848	2.33727	0.0194252	0.207917	140.033	107.911	135.041	81.1282	51.7294
Atp5g1	2240.9	0.430157	0.184087	2.3367	0.0194546	0.20807	2686.64	2242.95	2565.78	2062.26	1646.85
6430573F11Rik	57.6904	-1.31767	0.56401	-2.33626	0.0194777	0.208155	17.3492	40.1323	50.6405	86.1361	94.1939
Mtif3	961.314	0.434228	0.185968	2.33497	0.0195452	0.208572	998.816	1165.62	1053.32	828.309	760.5
Rps27a	2638.33	0.495021	0.212007	2.33493	0.019547	0.208572	3766.01	2644.27	2545.53	2231.53	2004.32
Dpp4	26.2393	-2.25741	0.967481	-2.33328	0.0196334	0.209332	17.3492	0.891829	13.5041	33.0522	66.399
Hspe1	890.443	0.451604	0.193601	2.33265	0.0196666	0.209523	1007.49	900.748	1084.83	771.219	687.924
Fermt2	3289.47	-0.344346	0.147718	-2.3311	0.0197479	0.209605	3024.95	2905.58	2977.66	3745.92	3793.23
Napepld	366.884	-0.617771	0.264896	-2.33212	0.0196942	0.209605	285.022	374.568	246.45	459.727	468.653
Pik3c2a	456.125	-0.697676	0.299296	-2.33105	0.0197505	0.209605	451.078	318.383	327.475	431.682	752.007
Psma7	3541.67	0.460195	0.197415	2.3311	0.0197482	0.209605	4103.08	3710.9	4113.13	3426.42	2354.85
Zfp280c	253.263	-0.711072	0.305038	-2.33109	0.0197485	0.209605	179.688	207.796	218.317	254.402	406.115
Pam	4481.43	0.454808	0.195189	2.33009	0.0198014	0.209983	6182.5	4541.2	4351.7	3689.83	3641.91
Pds5b	636.234	-0.602039	0.258427	-2.32963	0.0198255	0.210055	664.225	464.643	453.513	673.064	925.725
Sgms2	1709.65	-0.468038	0.200934	-2.32931	0.0198425	0.210055	1648.17	1247.67	1552.97	1824.88	2274.55
Tmem160	1336.32	0.469145	0.201428	2.3291	0.019854	0.210055	1511.86	1465.28	1531.59	1268	904.879
Chchd4	279.744	0.671076	0.288211	2.32842	0.0198898	0.210272	262.716	352.273	370.238	234.37	179.123
Aldh1l1	235.415	-0.788526	0.338764	-2.32765	0.0199306	0.21038	158.621	222.957	165.425	229.363	400.71
Dpysl3	8559.02	0.402741	0.173023	2.32767	0.0199297	0.21038	8084.71	10751.9	9611.56	7009.08	7337.86
Map1lc3b	11617.5	0.394383	0.169556	2.32598	0.0200198	0.210998	12021.7	13455.9	13060.7	10992.4	8556.97
Rasl11b	241.415	-0.983712	0.422911	-2.32605	0.020016	0.210998	107.813	139.125	273.458	442.7	243.978
Fam69c	1471.15	-0.524953	0.225772	-2.32514	0.0200643	0.211305	1122.74	1343.99	1286.27	2194.47	1408.28
BC005537	453.594	0.79634	0.342578	2.32455	0.0200961	0.211368	817.889	371.001	450.137	362.573	266.368
Leprot	4886.49	0.377377	0.162351	2.32446	0.020101	0.211368	4950.71	6015.39	5178.83	4228.68	4058.83
Alcam	14.4026	-2.37555	1.02269	-2.32285	0.0201874	0.212115	2.47845	3.56732	10.1281	28.0443	27.7949
Igfbp7	41718.2	0.45044	0.19405	2.32126	0.0202728	0.212848	38717.1	53258.3	48216.5	38634.1	29765.3
Snrnp200	946.206	-0.577965	0.249132	-2.31992	0.0203454	0.213448	972.793	605.552	794.492	1008.59	1349.6
Phf2	410.408	-0.627268	0.270426	-2.31955	0.0203651	0.213492	425.055	260.414	326.35	546.864	493.36
Bhlhe41	11.3431	2.74029	1.18207	2.3182	0.0204382	0.214095	24.7845	17.8366	9.00275	2.00317	3.08832
Ccdc12	1050.34	0.448699	0.193667	2.31686	0.0205113	0.214486	1141.33	1146	1240.13	964.525	759.728
Elovl4	1269.84	-0.48242	0.208239	-2.31666	0.0205223	0.214486	933.137	1277.99	1074.7	1683.66	1379.71
Loxl4	300.893	0.983688	0.424595	2.31677	0.0205164	0.214486	480.82	354.948	290.339	91.1441	287.214
Lcn2	122.049	3.34153	1.44291	2.31583	0.0205673	0.214793	178.449	227.416	166.551	37.0586	0.772081
Fam19a1	47.706	-1.23215	0.532144	-2.31544	0.0205887	0.214853	24.7845	32.1059	36.011	66.1045	79.5243
Bicd2	790.5	-0.469394	0.20276	-2.31502	0.0206118	0.214932	607.221	709.896	738.225	873.38	1023.78
4932438A13Rik	734.627	-0.588568	0.254303	-2.31443	0.0206439	0.215104	613.417	577.014	644.822	682.078	1155.81
Wnk4	83.7792	-1.00268	0.433397	-2.31355	0.0206926	0.215447	79.3105	50.8343	49.5151	124.196	115.04
Thada	256.971	-0.807402	0.349083	-2.31292	0.0207268	0.21564	276.347	153.395	164.3	275.435	415.38
Acly	1420.99	-0.489974	0.211966	-2.31157	0.0208015	0.216093	1259.05	1182.57	1228.87	1379.18	2055.28
Ctdspl	2060.73	0.482961	0.208983	2.311	0.0208328	0.216093	2762.24	2264.35	1949.09	1857.94	1470.04
Fkbp1a	7350.11	0.33876	0.146586	2.31099	0.0208331	0.216093	7720.38	8367.14	7976.43	6596.43	6090.17
Pofut2	4745.22	0.365708	0.158225	2.31131	0.0208157	0.216093	4876.36	5145.86	5613.21	4272.75	3817.94
Abhd11	488.48	0.496808	0.215071	2.30997	0.0208897	0.216516	588.633	529.747	540.165	418.662	365.194
Fbxw17	545.552	-0.749798	0.32492	-2.30764	0.0210191	0.217693	344.505	386.162	554.794	960.518	481.778
Sh2d4b	243.024	0.675775	0.292963	2.30669	0.021072	0.217913	273.869	347.813	235.197	185.293	172.946
Syde2	338.649	-0.583048	0.25275	-2.30682	0.0210648	0.217913	297.414	265.765	284.712	363.575	481.778
Zfp524	274.355	0.604876	0.262283	2.3062	0.0210996	0.218034	359.376	289.845	304.968	198.313	219.271
Senp5	493.647	-0.675572	0.293198	-2.30415	0.0212142	0.219054	479.581	338.895	378.115	461.73	809.913
2610034B18Rik	948.134	0.454132	0.197176	2.30318	0.0212688	0.219289	962.879	1124.6	1101.71	699.105	852.377
Tra2a	498.815	0.560095	0.24317	2.30331	0.0212615	0.219289	697.684	516.369	504.154	363.575	412.291
Med11	331.877	0.557061	0.241956	2.30232	0.0213172	0.219458	364.333	384.378	392.745	282.446	235.485
Numa1	1420.45	-0.577824	0.250963	-2.30243	0.0213111	0.219458	1359.43	1032.74	1169.23	1301.06	2239.81
Rps15a	1363.34	0.525609	0.22839	2.30136	0.0213712	0.21985	1922.04	1405.52	1331.28	1225.94	931.902
Cacnb4	77.2966	-1.02593	0.44586	-2.30101	0.0213909	0.219888	53.2867	49.0506	61.8939	87.1377	135.114
Cbfa2t3	627.57	-0.539597	0.234574	-2.30032	0.0214299	0.220124	658.029	450.374	486.148	771.219	772.081
2022-09-10	704.358	0.543539	0.236326	2.29995	0.021451	0.220177	768.32	891.829	755.105	661.045	445.491
4933439F18Rik	818.754	-0.432174	0.187981	-2.29903	0.0215034	0.220388	733.622	688.492	733.724	906.433	1031.5
Haus8	193.34	0.694188	0.301949	2.29902	0.0215036	0.220388	228.018	193.527	263.33	138.218	143.607
Dapk2	2199.66	-0.535855	0.233202	-2.29781	0.0215725	0.220929	1550.27	1901.38	2141.53	2108.33	3296.79
Uvrag	1163.05	-0.400982	0.174661	-2.29577	0.0216892	0.221959	1097.95	965.851	1029.69	1335.11	1386.66
Atp13a3	2156.59	-0.662068	0.288485	-2.29498	0.0217341	0.222254	2208.3	1768.5	1271.64	1925.04	3609.48
Ppfia2	163.064	-0.973235	0.424327	-2.2936	0.0218137	0.222902	76.832	148.936	127.164	151.239	311.149
Crabp1	21.863	-1.9041	0.830825	-2.29182	0.0219163	0.223784	6.19613	7.13464	18.0055	37.0586	40.9203
Map2k3	2573.7	0.504561	0.220319	2.29014	0.0220132	0.22444	2905.99	2767.35	3080.06	2547.03	1568.1
Usp45	214.846	-0.78669	0.343503	-2.2902	0.0220098	0.22444	126.401	173.015	200.311	219.347	355.157
Elmo2	2515.38	-0.376649	0.164549	-2.28898	0.0220803	0.224791	2143.86	2399.91	2197.8	2722.3	3113.03
Lrp2	8.98829	-3.77913	1.65088	-2.28916	0.0220698	0.224791	0	0	4.50137	8.01266	32.4274
Lix1l	285.92	0.755429	0.330107	2.28843	0.0221122	0.224949	462.231	275.575	286.963	240.38	164.453
Nrp2	5073.7	-0.449777	0.196718	-2.28641	0.0222305	0.225835	4815.63	4155.03	4308.94	4934.8	7154.1
Usp31	164.795	-0.934101	0.408551	-2.28638	0.0222321	0.225835	146.229	95.4257	121.537	144.228	316.553
Myl6	6339.09	0.35915	0.157111	2.28597	0.0222561	0.225912	7422.97	6699.42	6732.93	5816.19	5023.93
Ampd3	1449.14	0.473536	0.207287	2.28444	0.0223454	0.226484	1663.04	1894.25	1338.03	1085.72	1264.67
Npr2	1778.99	-0.396435	0.173528	-2.28456	0.0223389	0.226484	1760.94	1469.73	1507.96	2019.19	2137.12
Fosl2	224.8	1.05667	0.46262	2.28409	0.022366	0.226526	389.117	253.28	208.189	209.331	64.0827
Dab2	3462.26	-0.362274	0.158666	-2.28325	0.0224156	0.226675	2981.58	2976.93	3363.65	4166.59	3822.57
Gm20300	213.468	-0.802547	0.351531	-2.283	0.0224302	0.226675	180.927	203.337	109.158	240.38	333.539
Irf2	1483.08	-0.426023	0.186598	-2.28311	0.0224236	0.226675	1164.87	1310.1	1435.94	1897	1607.47
Fam96b	550.632	0.497748	0.218164	2.28153	0.0225173	0.227278	655.551	544.016	670.705	466.738	416.152
Gng5	5475.64	0.350511	0.153637	2.28143	0.0225229	0.227278	6199.85	5733.57	6044.22	5015.93	4384.65
Gstm7	349.978	-0.729164	0.319996	-2.27867	0.0226868	0.228765	173.492	296.087	361.235	442.7	476.374
Trim24	395.25	-0.706796	0.310266	-2.27803	0.0227248	0.228894	431.251	211.364	304.968	499.79	528.875
Ugt1a6a	82.3042	0.957517	0.420352	2.27789	0.0227329	0.228894	89.2243	104.344	112.534	59.0934	46.3249
Abhd12	4055.84	-0.34761	0.152639	-2.27733	0.0227663	0.229062	3402.92	3698.42	3870.06	4678.39	4629.4
Pcdhgb6	350.726	-0.645812	0.2838	-2.27559	0.0228704	0.229941	289.979	307.681	261.08	340.538	554.354
Popdc3	83.2335	-1.10871	0.487305	-2.27519	0.0228944	0.230015	59.4829	32.9977	78.774	105.166	139.747
Slc12a6	1356	-0.588704	0.258848	-2.27432	0.0229465	0.230258	1449.89	882.911	1054.45	1362.15	2030.57
Slc2a4	311.194	0.796778	0.350351	2.27423	0.0229521	0.230258	296.175	560.961	266.706	221.35	210.778
Krt85	22.6278	-2.25905	0.995077	-2.27022	0.0231941	0.232008	2.47845	5.35098	19.1308	66.1045	20.0741
Prickle2	349.16	-0.876862	0.38618	-2.2706	0.0231711	0.232008	313.524	185.501	286.963	273.432	686.38
Rps6	4456.72	0.379672	0.167225	2.27043	0.0231816	0.232008	5430.29	4692.81	4610.53	4059.42	3490.58
Tmem151b	40.3408	1.63389	0.719515	2.27081	0.0231582	0.232008	60.7221	22.2957	83.2754	13.0206	22.3903
Kazn	1725.32	0.476846	0.210163	2.26894	0.023272	0.232618	2328.51	1540.19	1964.85	1390.2	1402.87
Adam9	3984.98	0.398419	0.175671	2.26799	0.0233299	0.23263	4498.39	4357.48	4377.59	2883.56	3807.9
Gpcpd1	474.629	-0.661488	0.291642	-2.26815	0.0233199	0.23263	354.419	493.182	307.219	481.761	736.565
Ndufa13	1738.38	0.429278	0.189275	2.26801	0.0233286	0.23263	1920.8	1758.69	2133.65	1602.53	1276.25
Rev1	338.16	-0.576346	0.254181	-2.26747	0.0233618	0.23263	309.807	304.114	234.071	399.632	443.174
Sac3d1	480.944	0.799052	0.352415	2.26736	0.0233683	0.23263	656.79	474.453	606.56	477.755	189.16
Xpo6	1282.72	-0.40532	0.178771	-2.26725	0.0233747	0.23263	1151.24	1029.17	1226.62	1449.29	1557.29
Foxo1	1584	0.375534	0.165658	2.26692	0.0233951	0.232665	1684.11	1682.88	1864.69	1344.12	1344.19
Spry2	231.909	0.686853	0.30311	2.26601	0.0234505	0.233048	329.634	280.034	210.439	167.264	172.174
Neu3	144.369	-0.815018	0.359762	-2.26544	0.0234859	0.233231	99.1381	123.964	109.158	150.237	239.345
Cspg4	16.7019	-2.33585	1.03159	-2.26432	0.0235547	0.23324	1.23923	9.81012	7.8774	19.0301	45.5528
Hist1h1c	2222.28	0.40918	0.180665	2.26486	0.0235215	0.23324	2098.01	2643.38	2655.81	1804.85	1909.36
Myl12a	11397.9	0.333402	0.14722	2.26465	0.0235339	0.23324	12182.8	12472.2	12614	10503.6	9217.1
Tnks2	1647.08	-0.521445	0.230264	-2.26455	0.0235402	0.23324	1292.51	1294.04	1622.75	1575.49	2450.58
Adipor1	3687.83	0.353867	0.156385	2.26279	0.0236486	0.233498	3881.26	4275.43	3960.08	3338.28	2984.09
Ly6e	11872.3	-0.524281	0.231691	-2.26284	0.0236453	0.233498	8061.17	11714.2	10527.6	17819.2	11239.2
Trmt1	305.377	0.55814	0.246631	2.26306	0.0236323	0.233498	343.266	383.487	324.099	234.37	241.661
Zfp799	393.732	-0.618812	0.273426	-2.26318	0.0236247	0.233498	406.466	244.361	322.974	493.78	501.08
Pkdrej	4.94132	-5.96869	2.64041	-2.26052	0.0237893	0.234718	0	0	0	0	24.7066
Fcer1g	616.559	0.482478	0.213501	2.25984	0.0238313	0.234964	701.402	724.165	660.577	558.883	437.77
Dcaf7	2298.4	-0.440352	0.194962	-2.25866	0.0239047	0.235443	2435.08	1771.17	1828.68	2692.26	2764.82
Mlxip	1497.19	0.476017	0.210766	2.25851	0.023914	0.235443	1539.12	2062.8	1457.32	1294.05	1132.64
1700049G17Rik	155.156	-0.796002	0.352526	-2.25799	0.023946	0.235589	140.033	127.532	92.2782	174.275	241.661
Arhgap12	490.208	-0.741692	0.328532	-2.25759	0.023971	0.235666	330.873	428.97	399.497	397.628	894.07
Asb4	419.501	-0.585089	0.259364	-2.25586	0.0240793	0.235686	415.141	361.191	272.333	560.887	487.955
Carkd	1510.25	0.379076	0.168019	2.25614	0.0240618	0.235686	1566.38	1738.18	1686.89	1329.1	1230.7
Clec4a2	16.4144	2.23776	0.991483	2.25698	0.0240092	0.235686	33.4591	21.4039	16.8802	8.01266	2.31624
Dnajc25	632.026	0.439811	0.194925	2.25631	0.0240511	0.235686	667.943	725.949	724.721	518.82	522.699
Plin4	7.82037	3.24267	1.43758	2.25564	0.024093	0.235686	12.3923	15.1611	9.00275	1.00158	1.54416
Rnf168	524.378	-0.563429	0.249629	-2.25707	0.024004	0.235686	343.266	530.638	445.636	690.091	612.26
Vdr	2047.19	0.514798	0.228185	2.25605	0.0240673	0.235686	2086.86	2516.74	2376.73	1238.96	2016.68
Fgd5	4.49217	-4.78792	2.12344	-2.2548	0.0241459	0.236036	1.23923	0	0	5.00792	16.2137
Rit1	1560.87	0.41031	0.182022	2.25418	0.0241848	0.236248	1881.15	1605.29	1710.52	1422.25	1185.14
Atp11a	1761.97	-0.601944	0.267096	-2.25366	0.0242175	0.2364	1891.06	1236.97	1252.51	1660.62	2768.68
Adh7	209.878	0.726897	0.322657	2.25285	0.0242689	0.236734	242.888	314.816	190.183	143.226	158.277
Atox1	1338.09	0.501064	0.222514	2.25183	0.0243331	0.236856	1526.73	1444.76	1575.48	1308.07	835.391
Dcbld2	1793.14	-0.416112	0.184769	-2.25206	0.0243183	0.236856	1547.79	1548.22	1649.75	1831.9	2388.05
Mbd2	4330.35	-0.329951	0.1465	-2.25222	0.0243086	0.236856	3981.63	3842.89	3955.58	5087.04	4784.59
Prelid1	3529.51	0.468946	0.208323	2.25105	0.0243821	0.237165	4119.19	3671.66	4118.76	3476.49	2261.42
Zhx1	1178.79	-0.392024	0.1742	-2.25042	0.0244221	0.237386	1100.43	970.31	1073.58	1379.18	1370.44
Atf6b	1195.9	-0.38323	0.170369	-2.24941	0.0244862	0.237841	1048.39	1051.47	1098.34	1443.28	1338.02
Igf1	13768.7	-0.396292	0.176219	-2.24886	0.0245211	0.238012	13844.6	10358.6	12467.7	15137.9	17034.4
Atp6v0a4	13.913	-2.57907	1.14705	-2.24844	0.0245483	0.238109	1.23923	8.02646	4.50137	11.0174	44.7807
Zkscan16	7.29841	-3.53992	1.5747	-2.248	0.0245761	0.23821	1.23923	1.78366	1.12534	3.00475	29.3391
Cebpg	1167.18	0.396295	0.176421	2.24631	0.0246844	0.238871	1319.78	1280.67	1272.76	1051.66	911.055
Ostc	6634.27	0.346178	0.154103	2.2464	0.0246784	0.238871	7797.21	6750.26	7212.33	5951.41	5460.16
Rpl9	3848.89	0.423782	0.188673	2.24612	0.0246964	0.238871	4946.99	3969.53	3938.7	3562.63	2826.59
Max	978.519	0.535363	0.238427	2.2454	0.0247425	0.239081	1205.77	976.553	1168.11	941.488	600.679
Shroom3	892.084	-0.59793	0.26631	-2.24524	0.0247529	0.239081	943.051	622.497	656.075	878.388	1360.41
Zdhhc14	129.111	-1.01291	0.451244	-2.2447	0.0247876	0.239249	100.377	62.4281	112.534	254.402	115.812
Ssfa2	402.342	-0.644536	0.287196	-2.24424	0.0248169	0.239363	366.811	295.196	324.099	378.598	647.004
Plcl1	470.35	-0.776058	0.345873	-2.24376	0.0248476	0.239491	369.289	447.698	281.336	385.609	867.819
Camta2	999.29	-0.423809	0.188963	-2.24281	0.0249091	0.239652	900.918	820.483	917.155	1074.7	1283.2
Dedd2	182.093	0.689749	0.307554	2.24269	0.0249166	0.239652	235.453	203.337	205.938	115.182	150.556
Lsm12	919.687	0.485053	0.216248	2.24304	0.0248945	0.239652	1202.05	939.096	973.422	835.32	648.548
E130218I03Rik	130.097	0.790127	0.352621	2.24072	0.0250439	0.240708	164.817	165.88	138.417	104.165	77.2081
Exosc5	444.859	0.660382	0.294924	2.23916	0.0251453	0.241346	426.294	609.119	527.786	418.662	242.433
Trmt11	330.95	-0.588502	0.262793	-2.23941	0.0251293	0.241346	245.367	329.085	250.952	448.709	380.636
Cdkn1b	109.251	0.912767	0.407913	2.23765	0.025244	0.242124	166.056	142.693	94.5288	78.1235	64.8548
Sepw1	6865.85	0.45309	0.202647	2.23586	0.0253611	0.243078	9180.19	6389.07	7517.29	6312.98	4929.74
Mrpl23	777.368	0.477391	0.21355	2.2355	0.0253843	0.24313	910.831	787.485	929.534	713.127	545.861
Ffar2	40.52	1.48486	0.664358	2.23503	0.0254156	0.243261	37.1768	89.1829	37.1363	19.0301	20.0741
Adamtsl4	886.288	0.497449	0.222895	2.23177	0.0256303	0.245145	1154.96	982.796	873.266	608.963	811.457
B3gnt5	571.286	0.579798	0.259906	2.2308	0.0256944	0.245417	719.99	708.113	548.042	347.549	532.736
Lif	65.2305	-1.23184	0.552163	-2.23093	0.0256857	0.245417	32.2199	42.8078	51.7658	142.225	57.134
Bambi	686.615	-0.513559	0.230255	-2.23039	0.0257216	0.245507	460.992	680.466	616.688	813.285	861.642
Arhgef10	495.078	-0.6776	0.304047	-2.2286	0.0258403	0.246468	446.121	261.306	491.775	538.852	737.337
Nphp3	128.377	-0.892098	0.400405	-2.22799	0.0258813	0.246475	80.5497	87.3993	119.286	129.204	225.448
Tmem50a	6487.79	0.364834	0.163765	2.22779	0.0258948	0.246475	6942.15	7297.84	7132.43	6150.72	4915.84
Trappc8	730.321	-0.523604	0.23502	-2.22791	0.0258862	0.246475	634.484	597.526	633.568	705.114	1080.91
Ctbp1	3101.45	-0.395802	0.177731	-2.22697	0.0259492	0.246536	3168.7	2456.1	2637.8	3461.47	3783.2
Ing1	584.614	0.445897	0.200234	2.22688	0.025955	0.246536	649.355	689.384	623.44	493.78	467.109
Mysm1	407.156	-0.677549	0.304196	-2.22734	0.0259243	0.246536	349.462	381.703	254.328	388.614	661.673
4930422G04Rik	21.6534	-2.23763	1.00511	-2.22625	0.0259977	0.246771	6.19613	9.81012	10.1281	8.01266	74.1198
Rhobtb1	273.407	-0.588714	0.264539	-2.22543	0.0260524	0.24678	199.515	246.145	236.322	371.587	313.465
Scmh1	721.947	-0.429779	0.19308	-2.22591	0.0260202	0.24678	682.814	589.499	630.192	836.322	870.907
Six2	126.077	0.944722	0.424474	2.22563	0.0260389	0.24678	199.515	93.6421	175.554	72.114	89.5614
AV051173	112.551	0.834966	0.375319	2.22468	0.0261025	0.246941	127.64	131.991	149.671	90.1425	63.3106
Per2	144.057	0.709992	0.319203	2.22427	0.0261305	0.246941	171.013	177.474	163.175	105.166	103.459
Rnaseh2a	389.36	0.532264	0.239312	2.22415	0.0261387	0.246941	399.031	460.184	472.644	338.535	276.405
Sh3bgrl3	1494.9	0.443754	0.19952	2.22411	0.0261412	0.246941	1753.51	1536.62	1725.15	1419.24	1039.99
Herc3	80.4566	-1.00621	0.452476	-2.22378	0.0261632	0.246979	58.2436	41.0242	73.1473	100.158	129.71
Scai	111.101	-0.803348	0.36133	-2.22331	0.0261952	0.247112	76.832	96.3176	83.2754	156.247	142.835
Ccrn4l	164.68	0.701588	0.315703	2.22231	0.0262626	0.247578	218.104	171.231	194.684	128.203	111.18
Gpr180	2127.56	0.362414	0.16311	2.2219	0.0262903	0.247669	2316.11	2276.84	2411.61	1940.07	1693.17
Esm1	52356.2	-0.328365	0.147818	-2.22142	0.0263226	0.247803	43972.7	50544.4	47982.4	57390.7	61890.8
Cdk20	378.135	0.61082	0.275164	2.21984	0.0264299	0.248304	358.136	544.016	413.001	321.508	254.015
Stac	7.76372	4.79678	2.16065	2.22006	0.0264144	0.248304	0	23.1876	14.6295	1.00158	0
Zfp354c	446.152	-0.661123	0.297754	-2.22037	0.0263938	0.248304	465.949	270.224	351.107	461.73	681.747
Dag1	13607.9	-0.435495	0.196255	-2.21903	0.0264846	0.248648	13719.5	10011.7	12051.3	13918	18339.2
Slc35f3	15.1817	-2.52067	1.13623	-2.21845	0.0265244	0.248852	0	9.81012	5.62672	28.0443	32.4274
Calm3	2521.8	0.569959	0.257137	2.21656	0.0266533	0.24972	3821.77	1935.27	2945.02	2029.21	1877.7
Tm7sf2	33.0669	-1.70381	0.768648	-2.21663	0.0266482	0.24972	21.0668	23.1876	7.8774	29.0459	84.1568
Mlxipl	13.2491	-2.27528	1.02666	-2.21619	0.0266784	0.249786	6.19613	7.13464	2.25069	29.0459	21.6183
Apol9b	11.5438	-2.51679	1.1361	-2.21528	0.0267405	0.249911	1.23923	7.13464	3.37603	22.0348	23.9345
Slit2	1272.13	-0.628292	0.283623	-2.21523	0.026744	0.249911	1428.83	840.995	864.264	1246.97	1979.62
Zmynd11	1716.35	-0.391917	0.176922	-2.2152	0.0267463	0.249911	1599.84	1642.75	1334.66	1990.15	2014.36
Abcg3	5.57345	-4.32473	1.95311	-2.21429	0.0268092	0.250328	0	1.78366	0	6.0095	20.0741
Rhog	1429.03	0.3779	0.17073	2.21344	0.0268675	0.250533	1468.48	1681.1	1572.1	1242.96	1180.51
Trim25	905.287	-0.602606	0.272218	-2.21369	0.0268503	0.250533	1033.51	544.016	672.955	1198.89	1077.05
Birc5	46.8296	1.18473	0.535516	2.21231	0.026945	0.251085	59.4829	56.1853	65.2699	30.0475	23.1624
Ncoa6	418.895	-0.563419	0.25471	-2.212	0.0269666	0.251116	355.658	334.436	365.737	418.662	619.981
Irgm2	4316.72	-0.448484	0.202802	-2.21144	0.0270055	0.251308	2985.3	4303.08	4011.85	5643.92	4639.43
Glt8d2	197.759	-0.746745	0.337829	-2.21042	0.0270759	0.251793	116.487	140.909	209.314	253.401	268.684
Agps	1453.84	-0.661433	0.299295	-2.20997	0.0271074	0.251915	1200.81	1199.51	1138.85	1105.75	2624.3
Hmgb3	187.646	0.744555	0.336964	2.2096	0.0271329	0.251983	262.716	216.715	191.308	163.258	104.231
Itpk1	1667.85	0.375124	0.169816	2.209	0.0271748	0.252201	1919.56	1872.84	1716.15	1332.11	1498.61
S100a16	5603.55	0.330863	0.149855	2.20789	0.0272521	0.252748	5952	6385.5	5973.32	5096.05	4610.87
Mdm4	257.308	-0.732864	0.331973	-2.2076	0.027272	0.252762	275.108	196.202	139.543	310.491	365.194
Plac9	11806.1	0.500686	0.22693	2.20635	0.0273596	0.253403	15245	10068.8	14810.6	11092.5	7813.46
Itpr1	699.668	-0.579207	0.262642	-2.20531	0.0274323	0.253906	666.704	502.1	585.179	658.04	1086.32
Fam102a	131.935	-0.843545	0.382625	-2.20462	0.0274804	0.25418	132.597	97.2094	70.8966	168.266	190.704
Tuba1a	31281.1	0.35068	0.159191	2.20289	0.0276026	0.255139	35070.1	32088	35549.6	29513.6	24183.9
Irf8	1374.76	0.449879	0.204307	2.20197	0.0276674	0.255394	1430.07	1385.01	1805.05	1010.6	1243.05
Ttc7	297.766	0.667736	0.30324	2.20201	0.0276649	0.255394	437.447	313.924	298.216	178.282	260.963
Pnpla2	537.51	0.552306	0.250949	2.20087	0.0277453	0.25577	509.322	686.709	650.448	489.774	351.297
Tmed10	12230.6	0.314647	0.142956	2.201	0.0277362	0.25577	13626.5	13376.5	12808.7	11085.5	10255.6
Gngt2	89.4398	1.09476	0.497623	2.19998	0.0278085	0.255854	59.4829	156.07	124.913	58.0918	48.6411
Ppm1f	531.319	-0.528744	0.240299	-2.20036	0.0277816	0.255854	483.298	354.056	517.658	653.032	648.548
Zfp248	131.886	-0.791966	0.359992	-2.19995	0.0278102	0.255854	115.248	87.3993	103.532	207.328	145.923
Adam28	133.444	-0.811462	0.369158	-2.19814	0.027939	0.255987	76.832	127.532	102.406	198.313	162.137
Asap3	144.62	-0.697266	0.317218	-2.19806	0.0279445	0.255987	109.052	116.83	121.537	187.296	188.388
Dclk1	2365.64	0.390923	0.177786	2.19884	0.0278893	0.255987	2426.41	2524.77	2891.01	1811.86	2174.18
Ebf1	4660.58	-0.363715	0.165482	-2.19792	0.027955	0.255987	3656.96	4515.33	4369.71	5490.68	5270.22
Fgd4	120.721	-0.852077	0.387422	-2.19935	0.0278532	0.255987	71.8751	96.3176	105.782	131.207	198.425
Tusc5	710.59	0.45766	0.208219	2.19797	0.0279511	0.255987	898.439	770.541	723.596	538.852	621.525
Wnk2	5.84622	-4.19746	1.90921	-2.19854	0.0279108	0.255987	0	0	2.25069	20.0317	6.94873
Arl4c	23.411	-2.44598	1.11317	-2.19732	0.0279979	0.256039	6.19613	4.45915	14.6295	87.1377	4.63249
Pla2g4c	228.249	-0.712729	0.324347	-2.19743	0.0279897	0.256039	156.143	220.282	168.802	232.367	363.65
Fam40b	6.69182	6.10141	2.77941	2.19522	0.028148	0.257241	33.4591	0	0	0	0
Myo9b	272.741	-0.680216	0.309907	-2.19491	0.0281702	0.257273	268.912	189.96	201.436	276.437	426.961
Atg9a	1651.34	-0.383808	0.175192	-2.19079	0.0284669	0.258312	1613.47	1434.95	1367.29	2031.21	1809.76
Cables1	250.754	0.608857	0.277692	2.19257	0.0283386	0.258312	291.218	292.52	288.088	221.35	160.593
Irak2	777.195	-0.430366	0.196318	-2.19219	0.0283658	0.258312	650.594	731.3	665.078	845.336	993.668
Lats1	483.757	-0.63805	0.291138	-2.19157	0.0284103	0.258312	527.91	318.383	342.104	510.807	719.579
Mamdc2	7.0517	3.76414	1.71822	2.19072	0.0284718	0.258312	19.8276	7.13464	6.75206	0	1.54416
Mlycd	638.209	0.459568	0.209747	2.19106	0.0284475	0.258312	622.092	754.488	771.986	539.853	502.625
Pde9a	372.019	0.74528	0.339877	2.1928	0.028322	0.258312	294.936	447.698	587.429	328.519	201.513
Slc25a4	9374.78	0.385043	0.175732	2.19108	0.0284462	0.258312	11057.6	10333.6	9639.69	8999.22	6843.72
Sord	1412.3	0.385333	0.175853	2.19123	0.0284354	0.258312	1461.05	1535.73	1677.89	1265	1121.83
Synrg	257.044	-0.616443	0.281232	-2.19194	0.0283837	0.258312	213.147	202.445	220.567	268.424	380.636
Slco3a1	2683.19	-0.370931	0.169372	-2.19004	0.0285214	0.258592	2193.43	2352.65	2658.06	3260.15	2951.67
1700017G19Rik	54.3843	-1.30239	0.594935	-2.18913	0.0285877	0.259022	16.1099	53.5098	32.635	90.1425	79.5243
Edf1	2211.48	0.398759	0.182263	2.18783	0.0286822	0.259707	2350.81	2298.24	2694.07	2061.26	1653.03
Btbd10	504.629	-0.51804	0.236836	-2.18734	0.0287177	0.259858	400.27	376.352	514.282	657.038	575.2
Atad2b	206.349	-0.814971	0.372863	-2.18571	0.0288367	0.260744	138.793	208.688	127.164	197.312	359.79
Dnajc13	346.674	-0.780867	0.35734	-2.18522	0.0288726	0.260744	342.026	214.931	252.077	290.459	633.878
Kcnu1	5.74566	4.35423	1.99242	2.1854	0.0288598	0.260744	6.19613	8.02646	13.5041	1.00158	0
Mri1	403.772	0.512271	0.23446	2.18489	0.0288966	0.26079	417.619	516.369	441.135	339.537	304.2
Gm5506	1036.07	0.390484	0.178757	2.18445	0.0289295	0.260916	1099.19	1133.52	1200.74	918.452	828.443
Scube1	42.9225	-1.27051	0.581826	-2.18365	0.0289879	0.2611	27.263	26.7549	28.1336	86.1361	46.3249
Tmem17	261.847	0.565673	0.259023	2.18387	0.0289716	0.2611	282.544	317.491	302.717	190.301	216.183
Eif3f	1863.22	0.520086	0.238209	2.18332	0.0290119	0.261145	2651.94	1798.82	1908.58	1750.77	1205.99
5930403L14Rik	118.239	-1.13856	0.521571	-2.18293	0.0290406	0.261232	130.119	60.6444	49.5151	106.168	244.75
Nup214	624.315	-0.562536	0.257839	-2.18173	0.0291292	0.261858	660.508	429.862	483.898	664.05	883.261
Gm10220	30.0701	-1.61151	0.738774	-2.18133	0.029159	0.261955	27.263	8.02646	14.6295	44.0697	56.3619
4831440E17Rik	31.7868	-1.45226	0.666546	-2.17878	0.0293478	0.263478	23.5453	11.5938	21.3815	56.0887	46.3249
Birc3	1069.28	0.388809	0.178482	2.17842	0.0293747	0.263548	1173.55	1110.33	1259.26	871.377	931.902
Insc	59.5524	-1.33102	0.611112	-2.17803	0.0294035	0.263635	22.3061	33.8895	55.1418	52.0823	134.342
Gm14327	5.9131	-3.68874	1.6939	-2.17766	0.0294313	0.263712	1.23923	1.78366	0	8.01266	18.5299
Rbm38	34.5101	1.53092	0.703374	2.17654	0.0295146	0.263943	65.679	24.9712	49.5151	20.0317	12.3533
Rnf122	518.098	0.460937	0.211768	2.17661	0.0295095	0.263943	591.111	579.689	573.925	459.727	386.04
Zic3	38.198	-1.66708	0.765757	-2.17704	0.0294779	0.263943	11.153	32.9977	16.8802	28.0443	101.915
2510009E07Rik	2029.68	-0.454183	0.208724	-2.176	0.0295556	0.263966	1970.37	1423.36	1911.96	2147.39	2695.33
Phf11	70.0256	-0.992926	0.456302	-2.17603	0.0295532	0.263966	40.8945	50.8343	58.5179	114.18	85.701
Midn	248.305	0.886815	0.407784	2.17472	0.0296514	0.26465	494.451	198.878	219.442	181.287	147.467
Pcdhgc3	2294.65	-0.531522	0.244534	-2.17361	0.0297342	0.265217	2573.87	1524.14	1746.53	2443.86	3184.83
Tspan11	125.129	0.977696	0.449985	2.17273	0.0298005	0.265636	200.755	170.339	96.7795	55.0871	102.687
Zfp654	250.557	-0.736716	0.339118	-2.17245	0.0298218	0.265654	247.845	172.123	174.428	238.377	420.012
Ces1d	124.547	-0.778774	0.358635	-2.17149	0.0298939	0.266124	76.832	114.154	99.0302	168.266	164.453
Ube3b	1150.77	-0.452229	0.208329	-2.17075	0.0299504	0.266454	1154.96	885.587	970.046	1209.91	1533.35
Speg	543.703	0.459347	0.211702	2.16978	0.0300235	0.266932	643.158	561.853	625.691	474.75	413.063
Camk1	1899.37	0.379586	0.174979	2.16933	0.0300578	0.267064	2002.59	2012.86	2263.07	1746.76	1471.59
Dand5	211.039	-0.636404	0.293415	-2.16896	0.030086	0.267142	168.535	146.26	203.687	273.432	263.28
Atp1b2	70.6856	-0.975498	0.449893	-2.16829	0.0301369	0.267249	53.2867	43.6996	56.2672	85.1346	115.04
Upf1	1209.99	-0.435194	0.2007	-2.16838	0.0301295	0.267249	1220.64	1006.88	955.417	1295.05	1571.96
Olfml2b	19051.6	0.351255	0.162026	2.16789	0.030167	0.267343	18997.3	20851.9	22713.9	15038.8	17655.9
2610019F03Rik	120.028	-0.850611	0.3925	-2.16716	0.0302228	0.26748	63.2005	100.777	108.033	185.293	142.835
Cox7c	1347.35	0.373717	0.172428	2.16738	0.0302059	0.26748	1379.26	1474.19	1594.61	1129.79	1158.89
Csda	2261	0.33566	0.154901	2.16692	0.0302407	0.26748	2399.14	2456.1	2542.15	1911.02	1996.6
Ptpn6	17.0916	-2.05632	0.949602	-2.16546	0.0303528	0.268298	8.67458	6.24281	7.8774	14.0222	48.6411
Cdc42se2	2044.28	-0.342243	0.158154	-2.16398	0.030466	0.269126	1822.9	1775.63	1941.22	2367.74	2313.93
Heph	3203.57	-0.45952	0.212432	-2.16314	0.0305304	0.269447	2494.56	2776.26	3086.82	3047.82	4612.41
Lgals12	6.0886	4.5319	2.0952	2.163	0.0305415	0.269447	1.23923	16.0529	12.3788	0	0.772081
Pmm1	276.691	0.553985	0.256342	2.16111	0.0306867	0.270554	298.654	353.164	299.341	215.34	216.955
Mtss1l	1053.16	-0.606706	0.280773	-2.16084	0.0307074	0.270564	1256.58	673.331	684.209	1366.16	1285.51
Agbl5	1362.07	0.368351	0.170529	2.16006	0.0307684	0.270927	1563.9	1522.35	1404.43	1200.9	1118.75
E130308A19Rik	763.107	-0.4274	0.197952	-2.15911	0.0308416	0.271347	654.311	667.088	690.961	810.281	992.896
Sgk1	3192.72	-0.397805	0.18426	-2.15893	0.0308555	0.271347	2523.06	2918.07	3056.43	4191.63	3274.39
Cd82	2067.07	-0.49686	0.23024	-2.15801	0.0309268	0.271406	1536.64	1527.7	2260.81	2844.5	2165.69
Paip2	5016.34	0.308207	0.142785	2.15854	0.0308858	0.271406	5430.29	5444.62	5428.66	4344.87	4433.29
Twsg1	4874.46	-0.334713	0.155085	-2.15826	0.0309077	0.271406	4037.4	4578.65	4624.04	5399.53	5732.7
Wbp5	2846.65	0.32555	0.150869	2.15783	0.0309411	0.271406	3039.82	3213.26	3037.3	2469.9	2472.97
Apbb1ip	352.713	0.573466	0.265999	2.1559	0.0310918	0.27235	482.059	384.378	352.232	238.377	306.516
Brwd1	677.403	-0.438033	0.203206	-2.15561	0.0311139	0.27235	667.943	565.42	546.917	785.241	821.494
Lama1	471.267	-0.854172	0.396162	-2.15612	0.0310742	0.27235	449.839	297.871	321.848	315.499	971.278
St6galnac4	3581.41	0.441633	0.204893	2.15543	0.031128	0.27235	3301.3	4982.65	3726.01	3018.77	2878.32
Arl5a	1800.01	-0.433864	0.201415	-2.15408	0.0312338	0.273102	1675.43	1576.75	1484.33	1762.79	2500.77
2810013P06Rik	1065.46	0.389249	0.180762	2.15338	0.0312885	0.273233	1117.78	1277.99	1134.35	868.373	928.813
Fam84b	60.9798	-1.47083	0.682959	-2.15361	0.0312706	0.273233	58.2436	41.0242	7.8774	98.1551	99.5984
Rps11	4298.69	0.467753	0.217271	2.15285	0.0313301	0.273423	5945.81	4081.01	4475.49	4026.36	2964.79
Lactb2	396.113	-0.620186	0.288243	-2.15161	0.0314281	0.274104	287.501	361.191	329.726	370.586	631.562
Pus1	270.89	0.589005	0.27379	2.1513	0.0314523	0.274141	292.457	324.626	320.723	241.382	175.262
Peo1	229.59	0.635733	0.295705	2.14989	0.0315639	0.27494	266.434	228.308	308.344	194.307	150.556
Dock1	752.356	-0.672483	0.313051	-2.14816	0.0317012	0.275961	816.65	462.859	545.792	681.076	1255.4
1700084E18Rik	5.69166	4.34371	2.02287	2.1473	0.0317694	0.276205	3.71768	12.4856	11.2534	1.00158	0
Haus3	560.622	-0.561735	0.261573	-2.14752	0.0317517	0.276205	422.576	559.177	431.007	551.872	838.48
2810474O19Rik	1882.64	0.423174	0.197158	2.14637	0.0318435	0.276674	1716.33	2154.66	2416.11	1509.39	1616.74
Usmg5	1226.66	0.381871	0.177955	2.14588	0.0318824	0.276838	1338.36	1364.5	1353.79	1127.78	948.887
Npm3	135.465	1.11562	0.52002	2.14534	0.0319254	0.277036	291.218	92.7503	133.916	106.168	53.2736
Aspa	155.144	-0.718013	0.334727	-2.14507	0.0319471	0.277049	123.923	123.072	122.662	242.383	163.681
Pxdn	478.943	-0.660715	0.30807	-2.14469	0.0319775	0.277139	527.91	265.765	373.614	524.83	702.594
Net1	1534.35	0.385659	0.180016	2.14236	0.0321649	0.278412	1751.03	1603.51	1726.28	1161.84	1429.12
Ubxn6	978.807	0.420291	0.196174	2.14244	0.0321578	0.278412	1182.22	974.77	1109.59	882.395	745.058
Adssl1	4.52685	5.53591	2.58463	2.14186	0.032205	0.278583	13.6315	0	9.00275	0	0
Nckap1	2037.27	-0.398663	0.186191	-2.14115	0.0322616	0.278898	1831.58	1892.46	1698.14	2057.25	2706.92
Ahcy	329.033	0.635598	0.29716	2.13891	0.0324428	0.2798	457.275	427.186	266.706	245.388	248.61
Gpr56	58.4906	-1.1523	0.538821	-2.13855	0.0324717	0.2798	45.8514	32.9977	39.387	56.0887	118.128
Hck	15.0274	-2.18001	1.0196	-2.13811	0.0325074	0.2798	7.43536	3.56732	7.8774	13.0206	43.2365
Pard6g	1745.46	-0.40279	0.188291	-2.13919	0.0324204	0.2798	1337.13	1642.75	1658.76	1868.95	2219.73
Sat2	281.777	0.554522	0.259224	2.13916	0.0324227	0.2798	289.979	361.191	317.347	230.364	210.006
Taf10	978.289	0.47601	0.222557	2.13883	0.0324498	0.2798	1159.92	966.743	1179.36	931.472	653.952
Trnau1ap	600.632	0.485445	0.227045	2.1381	0.0325084	0.2798	715.034	627.848	690.961	560.887	408.431
Klf2	1168.76	0.43487	0.203458	2.13739	0.032566	0.279892	1143.81	1260.15	1510.21	880.392	1049.26
Nf2	604.563	-0.444997	0.208174	-2.13762	0.0325478	0.279892	540.303	482.48	562.672	666.053	771.309
Nqo2	840.889	0.401443	0.187834	2.13722	0.0325801	0.279892	925.702	920.368	947.539	759.2	651.636
Rassf1	1203.62	0.489101	0.228899	2.13675	0.032618	0.280042	1189.66	1520.57	1368.42	1165.84	773.625
Bves	136.948	-0.756071	0.353912	-2.13633	0.0326528	0.280167	116.487	81.1565	124.913	182.288	179.895
Atp2a2	5092.46	-0.40563	0.189914	-2.13587	0.0326903	0.280314	5106.85	3911.56	4504.75	5221.25	6717.88
Clybl	364.423	0.529437	0.247928	2.13545	0.0327245	0.280431	346.983	434.321	464.767	293.464	282.582
1810034E14Rik	80.2833	0.957925	0.448743	2.13468	0.0327869	0.280791	89.2243	85.6156	123.788	61.0966	41.6924
S100b	1490.26	-0.496328	0.232718	-2.13274	0.032946	0.281979	957.922	1361.82	1519.21	2007.17	1605.16
Ints2	381.199	-0.57666	0.270645	-2.13069	0.0331146	0.283245	283.783	342.462	329.726	375.594	574.428
Slc25a15	341.164	-0.575433	0.270121	-2.13028	0.0331488	0.283361	334.591	220.282	301.592	441.698	407.659
Fut11	4188.08	-0.329484	0.154723	-2.12951	0.033212	0.283724	3593.76	3827.73	3973.59	4512.13	5033.2
Nrbp2	689.948	0.523177	0.245708	2.12926	0.0332324	0.283724	894.721	849.022	612.187	618.978	474.83
Uqcr10	1186.47	0.415375	0.195125	2.12876	0.0332738	0.2839	1332.17	1262.83	1359.41	1124.78	853.149
Stx6	1795.44	-0.428764	0.201562	-2.12721	0.0334027	0.284823	1598.6	1323.47	1809.55	2334.69	1910.9
Btg1	3309.08	0.458028	0.215346	2.12694	0.0334253	0.284826	3007.6	4674.08	3457.05	2495.95	2910.74
Cadps2	93.3375	-0.950987	0.447185	-2.12661	0.0334526	0.284826	99.1381	49.0506	56.2672	130.206	132.026
Gfpt2	372.511	0.706901	0.332431	2.12646	0.033465	0.284826	304.85	535.989	480.522	343.543	197.653
Fan1	84.6559	-1.08163	0.508819	-2.12577	0.0335224	0.284961	76.832	69.5627	29.2589	100.158	147.467
Ptch2	26.6375	1.72033	0.809266	2.12579	0.0335212	0.284961	42.1337	26.7549	41.6377	18.0285	4.63249
Limd1	1947.49	0.353036	0.166116	2.12524	0.0335669	0.285163	2322.31	2028.91	2047	1711.71	1627.55
Rab3gap1	791.927	-0.415477	0.195522	-2.12496	0.0335897	0.28518	625.809	747.353	722.47	890.407	973.594
Mmp10	6.82568	-3.08731	1.45313	-2.12459	0.0336211	0.285272	1.23923	2.67549	1.12534	9.01425	20.0741
Ftl1	53204.8	0.376708	0.177347	2.12413	0.033659	0.285417	56134.5	56595.5	63040.6	51921.1	38332.3
C030048B08Rik	256.129	0.553903	0.260919	2.12289	0.0337633	0.286124	291.218	298.763	290.339	217.344	182.983
Chrnb1	23.398	2.07544	0.977849	2.12245	0.0337998	0.286127	29.7414	23.1876	48.3898	1.00158	14.6695
Clcn3	80.6832	0.874481	0.412027	2.12239	0.0338052	0.286127	106.573	98.1012	91.1528	55.0871	52.5015
Kat2a	748.405	-0.444057	0.209257	-2.12206	0.0338323	0.28618	641.919	707.221	612.187	998.578	782.118
Bin1	1990.96	0.399647	0.188359	2.12173	0.0338607	0.286245	2070.75	2535.47	2005.36	1809.86	1533.35
Cox6b1	2588.28	0.367804	0.173372	2.12147	0.0338823	0.286251	2805.61	2752.19	2974.28	2452.88	1956.45
Nkx6-1	12.3644	-2.37554	1.11989	-2.12122	0.0339032	0.286252	7.43536	5.35098	1.12534	17.0269	30.8832
Speer7-ps1	19.8401	-1.82969	0.862931	-2.12031	0.0339795	0.28672	6.19613	10.702	12.3788	49.0776	20.8462
Ptplad1	2451.05	-0.331236	0.156265	-2.11971	0.0340302	0.286972	2130.23	2226.9	2308.08	2696.26	2893.76
Cib1	2362.2	0.357356	0.168653	2.11889	0.0341	0.287385	2576.35	2579.17	2611.92	2224.52	1819.02
Trp63	94.3821	0.915778	0.432631	2.11677	0.0342798	0.288723	89.2243	157.854	101.281	64.1013	59.4502
2022-09-09	1176.7	-0.564634	0.266832	-2.11607	0.034339	0.288926	1353.24	742.002	868.765	1295.05	1624.46
Slc1a3	1721.63	0.456556	0.215765	2.11599	0.034346	0.288926	2157.49	2159.12	1476.45	1486.35	1328.75
Ppp2r5a	1604.38	-0.340813	0.161159	-2.11477	0.0344498	0.28945	1438.74	1502.73	1407.8	1828.89	1843.73
Tab3	125.915	-1.02572	0.485031	-2.11476	0.0344503	0.28945	142.511	81.1565	43.8884	151.239	210.778
Gm12250	919.307	-0.720155	0.340681	-2.11387	0.0345262	0.289734	397.792	923.935	867.64	1505.38	901.79
Zzz3	692.32	-0.428343	0.202622	-2.114	0.0345151	0.289734	619.613	582.365	623.44	735.162	901.018
Cox7b	1261.84	0.389826	0.184495	2.11294	0.0346062	0.290228	1400.33	1450.11	1330.16	1175.86	952.748
Rps3	4624.9	0.469163	0.222095	2.11244	0.0346484	0.290405	6518.33	4387.8	4701.68	4331.85	3184.83
Pcdhb12	372.722	0.552417	0.261545	2.11213	0.0346757	0.290456	459.753	337.112	485.023	274.434	307.288
Ap2s1	1868.55	0.450972	0.213557	2.11171	0.034711	0.290575	2102.97	2137.72	2038	1861.94	1202.13
Zmym6	164.775	-0.791256	0.374864	-2.11078	0.034791	0.291068	112.77	156.07	113.66	157.249	284.126
Arhgef5	222.054	-0.657146	0.311623	-2.10878	0.0349635	0.291991	189.602	194.419	157.548	224.355	344.348
Slc24a3	933.526	-0.544177	0.258085	-2.10852	0.0349863	0.291991	820.368	673.331	874.392	850.344	1449.2
Tmem183a	880.682	-0.457115	0.216788	-2.10858	0.0349808	0.291991	888.525	775.892	634.694	1133.79	970.506
Yif1a	2638.32	0.350797	0.16632	2.10917	0.03493	0.291991	2965.47	2727.21	2969.78	2456.88	2072.27
Abhd5	1938.74	0.346262	0.164542	2.1044	0.0353439	0.292977	1987.72	2287.54	2083.01	1691.67	1643.76
Atp11b	720.097	-0.495426	0.235499	-2.10372	0.0354026	0.292977	727.426	576.122	553.669	734.16	1009.11
Bcam	803.078	0.491082	0.233317	2.10479	0.0353099	0.292977	767.081	864.183	1091.58	728.151	564.391
Calhm2	756.558	0.396582	0.188477	2.10415	0.0353657	0.292977	826.564	874.885	809.122	663.048	609.172
Car15	7.07402	3.55897	1.69124	2.10436	0.0353471	0.292977	18.5884	8.02646	6.75206	2.00317	0
Chd3	300.556	-0.649167	0.308501	-2.10426	0.0353555	0.292977	247.845	266.657	220.567	277.439	490.271
Etnk1	1350.58	-0.482879	0.229327	-2.10564	0.035236	0.292977	1457.33	941.772	1098.34	1457.3	1798.18
Fh1	1206.76	0.354203	0.168116	2.1069	0.0351262	0.292977	1312.34	1294.04	1359.41	1022.62	1045.4
Lpcat1	856.038	0.450183	0.213772	2.1059	0.0352131	0.292977	1147.52	890.938	838.381	723.143	680.203
Med12	465.474	-0.813024	0.386465	-2.10375	0.0354007	0.292977	591.111	222.066	259.954	513.812	740.426
N4bp2l1	52.7408	1.1051	0.524584	2.10662	0.0351507	0.292977	64.4398	52.6179	84.4008	29.0459	33.1995
Sult1a1	3089.43	0.52444	0.24908	2.10551	0.035247	0.292977	2842.79	4843.53	2867.37	2655.2	2238.26
Xdh	4467.75	-0.417743	0.198494	-2.10456	0.0353296	0.292977	4100.6	4565.27	3149.84	4853.67	5669.39
Zfp955a	319.028	-0.614466	0.2919	-2.10506	0.0352864	0.292977	245.367	321.059	222.818	329.521	476.374
Mmd	1626.76	0.488351	0.232195	2.10319	0.035449	0.292995	2096.77	2097.58	1318.9	1348.13	1272.39
Phkg1	85.8509	1.19069	0.566113	2.10327	0.0354424	0.292995	115.248	153.395	63.0192	72.114	25.4787
Rusc2	423.251	-0.495081	0.23542	-2.10297	0.0354687	0.292995	375.486	313.032	402.873	543.86	481.006
Shh	4.32365	-5.77619	2.74707	-2.10267	0.0354943	0.293031	0	0	0	0	21.6183
Loxl1	10273.5	-0.453916	0.215931	-2.10213	0.0355418	0.293246	11102.2	7104.31	8643.76	13797.8	10719.6
Loxl3	3444	0.333762	0.158811	2.10163	0.0355857	0.293432	3551.62	4023.04	3687.75	2824.46	3133.1
Cyp39a1	642.799	0.409037	0.194733	2.1005	0.0356849	0.294075	733.622	708.113	697.713	561.888	512.662
Ocel1	213.295	0.599168	0.285507	2.09862	0.0358508	0.295265	230.496	263.09	246.45	181.287	145.151
Zfp955b	384.079	-0.516513	0.246159	-2.09829	0.0358794	0.295323	271.391	361.191	349.982	443.701	494.132
Cdk2ap2	1059.4	0.373306	0.177983	2.09742	0.0359562	0.295779	1183.46	1145.11	1168.11	959.517	840.796
Tirap	663.314	0.479249	0.228537	2.09703	0.0359912	0.29589	676.618	771.432	794.492	626.991	447.035
Chmp2a	2479.65	0.343782	0.164055	2.09553	0.0361242	0.296629	2633.36	2750.4	2743.59	2313.66	1957.22
Smg6	717.81	-0.508743	0.242774	-2.09554	0.0361229	0.296629	645.637	468.21	729.223	803.27	942.711
2310035K24Rik	561.64	0.429711	0.205172	2.0944	0.0362245	0.296675	572.523	651.927	653.825	459.727	470.197
2310061J03Rik	240.365	0.575688	0.274894	2.09422	0.0362405	0.296675	265.194	293.412	271.208	208.329	163.681
Acad11	1493.52	0.37825	0.180641	2.09393	0.0362664	0.296675	1602.32	1741.74	1592.36	1136.8	1394.38
Amy1	4619.45	-0.369548	0.176507	-2.09367	0.0362894	0.296675	3471.07	4497.5	4439.48	5477.66	5211.55
Dido1	474.179	-0.573206	0.273771	-2.09374	0.0362829	0.296675	490.734	417.376	282.461	561.888	618.437
Pkmyt1	225.996	0.573272	0.273831	2.09352	0.0363024	0.296675	262.716	276.467	240.823	186.294	163.681
Rps23	2798.38	0.443052	0.211622	2.0936	0.0362953	0.296675	3658.2	2900.23	2829.11	2704.27	1900.09
Srebf1	1663.3	0.340975	0.162769	2.09485	0.0361846	0.296675	1794.4	1797.04	1856.82	1499.37	1368.9
Oasl2	3404.28	-0.492712	0.235487	-2.09231	0.0364107	0.297194	2083.14	3174.91	3523.45	4580.24	3659.66
Polr2e	974.868	0.482943	0.230896	2.0916	0.036474	0.297194	1273.92	948.906	1076.95	924.461	650.092
Sra1	1935.8	0.368569	0.176207	2.09168	0.0364674	0.297194	2117.84	2104.72	2159.53	1836.9	1460
Wwox	310.444	0.636706	0.30432	2.09223	0.036418	0.297194	275.108	327.301	483.898	237.375	228.536
Zbed4	85.6483	1.23037	0.588161	2.0919	0.0364477	0.297194	206.951	61.5362	65.2699	45.0712	49.4132
Gm14872	408.333	0.498896	0.238551	2.09135	0.0364963	0.297199	477.102	423.619	486.148	367.581	287.214
Apool	382.9	0.470086	0.224826	2.09089	0.0365383	0.297366	442.404	411.133	438.884	322.51	299.567
Spag9	1209.21	-0.578009	0.276582	-2.08983	0.0366333	0.297786	1257.81	1001.52	771.986	1110.76	1903.95
Tbc1d17	1944.81	0.36505	0.174677	2.08985	0.036631	0.297786	1889.82	2356.21	2160.66	1656.62	1660.75
Ppp1r3b	1402.68	-0.46832	0.224175	-2.08909	0.0366999	0.298151	1511.86	1176.32	961.043	1574.49	1789.68
Hp1bp3	3393.34	-0.316161	0.151387	-2.08843	0.036759	0.298455	3226.95	2940.36	3104.82	3773.97	3920.63
Eef1d	1464.77	0.415245	0.199105	2.08556	0.0370187	0.299965	1773.33	1614.21	1494.46	1397.21	1044.63
Hoxa3	105.192	-0.819579	0.393008	-2.0854	0.0370331	0.299965	73.1144	68.6709	100.156	124.196	159.821
Pygo1	272.61	-0.531419	0.254829	-2.0854	0.0370331	0.299965	210.668	252.388	230.695	336.532	332.767
Sik1	1090.77	0.689821	0.330735	2.08572	0.0370037	0.299965	1846.45	688.492	1324.53	869.374	724.984
Srl	113.334	-1.02838	0.493189	-2.08517	0.0370539	0.299965	79.3105	122.181	38.2617	136.215	190.704
1810020D17Rik	478.636	0.447459	0.214704	2.08407	0.0371535	0.30044	553.934	516.369	536.789	421.666	364.422
Rps14	3576.82	0.45927	0.220375	2.08404	0.0371564	0.30044	4943.27	3724.28	3376.03	3378.34	2462.17
Fam189a1	608.505	-0.604202	0.290067	-2.08298	0.0372533	0.300781	702.641	354.948	454.639	785.241	745.058
Pcyox1l	315.665	0.521086	0.250178	2.08286	0.0372641	0.300781	374.246	312.14	391.62	249.394	250.926
Phb	2833.51	0.3768	0.180875	2.08321	0.0372325	0.300781	3111.7	2997.44	3251.12	2737.33	2069.95
Phf6	529.92	-0.474441	0.227841	-2.08233	0.037312	0.300991	496.93	449.482	429.881	549.869	723.44
P2rx6	68.8117	-1.18468	0.56916	-2.08145	0.0373923	0.301462	18.5884	48.1588	69.7713	107.169	100.371
Ahsg	16.8641	2.10105	1.00963	2.081	0.0374337	0.301483	29.7414	20.5121	22.5069	10.0158	1.54416
G3bp2	3599.47	-0.317472	0.152579	-2.08071	0.0374607	0.301483	3482.23	3100	3248.87	4127.52	4038.75
G630025P09Rik	94.1717	0.910566	0.437599	2.08082	0.0374503	0.301483	83.0282	115.046	149.671	52.0823	71.0314
Ccdc50	820.358	-0.570891	0.274489	-2.07983	0.0375411	0.301876	759.646	656.386	645.947	704.113	1335.7
Ptpla	1091.59	0.392618	0.188808	2.07946	0.0375753	0.301876	1161.16	1286.02	1171.48	1011.6	827.671
Ybx1	4848.91	0.460934	0.221656	2.0795	0.0375714	0.301876	7103.25	4345.88	4885.12	4105.49	3804.81
B3gnt9-ps	2795.64	0.321261	0.1546	2.07802	0.0377079	0.302763	3126.57	2851.18	3137.46	2427.84	2435.14
Cars	563.233	-0.499662	0.240586	-2.07685	0.0378156	0.303451	403.988	445.915	599.808	680.075	686.38
Rcan2	624.53	-0.588613	0.283503	-2.07622	0.0378738	0.303741	368.05	479.804	711.217	819.295	744.286
B430319G15Rik	217.561	-0.609961	0.294003	-2.07468	0.0380164	0.303856	188.362	169.448	181.18	319.505	229.308
Camkk1	20.1307	-1.71816	0.828041	-2.07497	0.0379892	0.303856	8.67458	11.5938	11.2534	22.0348	47.0969
Eci2	1320.07	0.361739	0.174333	2.07499	0.0379872	0.303856	1365.63	1519.68	1459.57	1193.89	1061.61
Gm16197	17.3394	-2.07678	1.00104	-2.07463	0.0380206	0.303856	16.1099	3.56732	3.37603	25.0396	38.604
Zfp273	121.065	-0.934821	0.450561	-2.07479	0.0380058	0.303856	74.3536	100.777	91.1528	98.1551	240.889
Zscan29	366.63	-0.501896	0.241798	-2.07569	0.0379231	0.303856	323.438	313.924	306.093	388.614	501.08
Ccrl2	40.9004	-1.34338	0.647719	-2.07401	0.0380785	0.303965	32.2199	30.3222	13.5041	45.0712	83.3847
Fhl1	1397.75	-0.377445	0.181979	-2.07411	0.0380688	0.303965	1180.98	1351.12	1213.12	1479.34	1764.2
Arf6	1954.64	0.342156	0.165044	2.07312	0.0381609	0.304269	2192.19	2010.18	2202.3	1778.81	1589.71
Lamb1	8043.21	-0.350671	0.169151	-2.07313	0.0381602	0.304269	7323.83	6802.87	7611.82	8130.85	10346.7
Batf	234.81	0.934655	0.451192	2.07152	0.0383098	0.30528	272.63	238.118	358.985	236.374	67.9431
Inf2	11.3781	2.74344	1.32464	2.07108	0.0383518	0.305437	35.9376	12.4856	3.37603	2.00317	3.08832
Aldh2	5048.61	-0.308854	0.149179	-2.07036	0.0384184	0.305438	4614.88	4384.23	4826.6	5892.31	5525.01
Lage3	490.051	0.491885	0.237534	2.0708	0.0383775	0.305438	510.561	573.446	577.301	457.723	331.223
Triobp	939.908	-0.385498	0.186191	-2.07045	0.0384102	0.305438	826.564	781.243	904.776	1039.64	1147.31
Lrrc40	554.629	-0.474842	0.229492	-2.0691	0.0385367	0.306082	422.576	521.72	495.151	580.918	752.779
Prdm9	9.23129	-2.82621	1.36602	-2.06894	0.0385522	0.306082	1.23923	4.45915	2.25069	5.00792	33.1995
Thbs4	31.4155	1.61308	0.779763	2.06868	0.038576	0.306082	57.0044	50.8343	21.3815	7.01108	20.8462
Unc13b	167.611	-0.860047	0.415773	-2.06855	0.0385885	0.306082	76.832	134.666	167.676	166.263	292.619
Wdfy1	1343.12	-0.343924	0.166285	-2.06828	0.0386139	0.306107	1242.94	1203.97	1190.61	1589.51	1488.57
1810055G02Rik	1219.07	0.38403	0.18571	2.0679	0.038649	0.306197	1231.79	1381.44	1420.18	1120.77	941.167
Rps21	676.049	0.568366	0.274881	2.06768	0.0386698	0.306197	1044.67	623.389	663.953	591.936	456.3
Dcun1d1	1165.39	-0.358679	0.173524	-2.06703	0.0387317	0.306335	1075.65	997.957	1067.95	1402.22	1283.2
Hist2h2be	46.6432	-1.23734	0.598564	-2.06718	0.038717	0.306335	29.7414	43.6996	16.8802	81.1282	61.7665
Col24a1	8.81158	-2.98738	1.44596	-2.06603	0.0388261	0.306523	4.95691	0	2.25069	26.0412	10.8091
Gmppa	1280.81	0.371792	0.179917	2.06646	0.0387846	0.306523	1339.6	1463.49	1422.43	1184.87	993.668
Plb1	19.3068	1.83033	0.886002	2.06583	0.0388447	0.306523	17.3492	40.1323	23.6322	10.0158	5.40457
Slc3a2	2644.4	0.406568	0.196788	2.06602	0.0388264	0.306523	2510.67	2959.09	3326.52	2483.93	1941.78
Dok1	894.953	0.389484	0.188639	2.0647	0.038951	0.307011	1078.13	964.068	923.907	721.14	787.522
Ramp1	97.451	0.88984	0.430977	2.0647	0.0389511	0.307011	94.1812	105.236	158.673	75.1187	54.0457
Stk11ip	266.351	0.643301	0.31164	2.06424	0.0389949	0.30718	363.093	353.164	217.191	188.298	210.006
Mknk2	695.811	0.569053	0.275729	2.06381	0.0390353	0.307322	1090.52	674.223	635.819	595.942	482.551
5430416O09Rik	81.3243	1.0544	0.511316	2.06213	0.0391956	0.307703	81.7889	160.529	65.2699	48.076	50.9573
Acaa2	1103.2	0.511321	0.24792	2.06244	0.0391656	0.307703	1242.94	1341.31	1172.61	1116.77	642.371
Atg4d	368.641	0.577324	0.279858	2.06292	0.0391206	0.307703	416.38	450.374	406.249	355.562	214.638
Cdh19	8.26141	-3.53239	1.71285	-2.06229	0.0391806	0.307703	4.95691	0	0	7.01108	29.3391
Gm9054	12.9178	-2.16702	1.05054	-2.06276	0.0391355	0.307703	6.19613	4.45915	5.62672	12.019	36.2878
Dbnl	1329.18	-0.355282	0.172333	-2.06161	0.0392449	0.307915	1097.95	1262.83	1225.5	1532.42	1527.18
Fkbp1b	49.2488	1.0967	0.532254	2.06047	0.0393533	0.308589	63.2005	74.9137	49.5151	30.0475	28.567
Adam23	8.68224	3.87017	1.87969	2.05894	0.0394996	0.309216	3.71768	36.565	1.12534	2.00317	0
Herpud1	4740.63	0.46829	0.227443	2.05893	0.0395007	0.309216	5110.57	4419.01	6465.1	4616.3	3092.18
Zfp12	609.006	-0.569415	0.276538	-2.05908	0.0394866	0.309216	607.221	469.994	454.639	558.883	954.292
Cenpe	12.0128	-3.29495	1.60068	-2.05846	0.0395458	0.309393	2.47845	0	5.62672	1.00158	50.9573
B230219D22Rik	1414.65	-0.368715	0.179184	-2.05774	0.0396151	0.309644	1292.51	1272.64	1236.75	1469.32	1802.04
Cd97	2525.28	0.387511	0.188326	2.05766	0.0396229	0.309644	2410.3	3297.99	2654.69	2119.35	2144.07
Adra2a	350.121	-0.506434	0.246277	-2.05636	0.0397481	0.309836	324.677	253.28	321.848	417.66	433.137
Galk2	937.087	0.383784	0.186617	2.05654	0.0397308	0.309836	965.357	1129.95	1004.93	819.295	765.904
Gm15417	94.6833	0.917258	0.446087	2.05623	0.0397601	0.309836	121.444	126.64	101.281	83.1314	40.9203
Pcdhga2	64.8906	-1.04679	0.508887	-2.05702	0.0396839	0.309836	33.4591	40.1323	63.0192	75.1187	112.724
Tet1	105.583	-0.765023	0.372021	-2.05639	0.0397446	0.309836	76.832	74.0218	96.7795	138.218	142.063
Slc6a9	622.184	-0.49376	0.240177	-2.05582	0.0398002	0.309973	596.068	427.186	581.803	840.328	665.534
Gda	45.789	1.16032	0.564606	2.0551	0.0398694	0.310336	40.8945	67.779	67.5206	28.0443	24.7066
Dpy19l3	469.175	-0.613538	0.298863	-2.0529	0.0400819	0.311637	470.906	272.008	419.753	476.754	706.454
Rps26	1167.63	0.501024	0.244054	2.05292	0.0400799	0.311637	1711.37	1096.06	1161.35	1048.66	820.722
Atg16l2	196.769	-0.608161	0.29632	-2.05238	0.0401329	0.311853	135.076	174.799	177.804	241.382	254.787
Ppp2r5b	798.36	-0.445252	0.216968	-2.05215	0.040155	0.311853	739.818	587.716	765.234	1046.65	852.377
Fzd4	880.646	-0.474103	0.231101	-2.0515	0.0402184	0.312169	919.506	702.762	665.078	911.441	1204.45
Ralbp1	805.765	0.437288	0.213293	2.05017	0.0403478	0.312786	899.678	930.178	868.765	771.219	558.987
Rhoj	1751	0.454908	0.221873	2.05031	0.0403346	0.312786	1753.51	2476.61	1658.76	1557.46	1308.68
Rint1	517.649	0.421403	0.205565	2.04998	0.0403668	0.312786	578.719	593.067	555.92	446.706	413.835
Smarcc2	1458.11	-0.417124	0.2035	-2.04975	0.0403888	0.312786	1304.91	1338.64	1214.25	1422.25	2010.5
4933404O12Rik	72.0301	-0.927018	0.45236	-2.04929	0.0404336	0.312957	68.1574	48.1588	42.763	99.1567	101.915
2610035D17Rik	269.132	0.620114	0.302705	2.04858	0.0405036	0.313322	242.888	393.297	301.592	223.353	184.527
B230206F22Rik	124.332	-0.824584	0.402865	-2.0468	0.040678	0.314021	59.4829	102.56	122.662	173.274	163.681
Epb4.1l5	776.398	0.489658	0.23924	2.04672	0.0406853	0.314021	987.663	991.714	652.699	622.985	626.93
Fam20b	2092.18	-0.318173	0.155451	-2.04677	0.0406805	0.314021	1919.56	1926.35	1866.94	2313.66	2434.37
Timm8a1	312.186	0.660871	0.322843	2.04704	0.0406543	0.314021	422.576	280.034	394.996	293.464	169.858
Cd63	29082.3	0.29068	0.142194	2.04425	0.0409285	0.315367	30476.3	31007.1	32632.7	26742.3	24552.9
Fam82a1	349.873	-0.605416	0.296145	-2.04432	0.0409216	0.315367	244.128	291.628	331.976	548.868	332.767
Fibp	1085.63	0.359284	0.175753	2.04426	0.0409283	0.315367	1257.81	1159.38	1154.6	961.52	894.842
Hspb8	36.3763	1.29326	0.633029	2.04297	0.0410558	0.316171	37.1768	50.8343	55.1418	14.0222	24.7066
D14Abb1e	576.372	-0.644545	0.315553	-2.04259	0.0410932	0.316254	496.93	560.069	354.483	496.785	973.594
Opa3	799.223	0.384422	0.188221	2.04239	0.0411126	0.316254	909.592	855.264	880.019	718.135	633.106
Sparcl1	48.4502	-1.24711	0.610741	-2.04197	0.0411546	0.3164	40.8945	34.7813	18.0055	99.1567	49.4132
Dap	2040.14	0.398401	0.195256	2.0404	0.0413103	0.31742	2101.73	2156.44	2515.14	1958.09	1469.27
Epb4	787.388	-0.409697	0.200892	-2.03939	0.041411	0.318016	790.626	664.413	633.568	889.406	958.924
Epb4	787.388	-0.409697	0.200892	-2.03939	0.041411	0.318016	29.7414	16.9448	5.62672	10.0158	21.6183
Epb4	787.388	-0.409697	0.200892	-2.03939	0.041411	0.318016	11.153	16.9448	13.5041	19.0301	16.9858
Tecpr1	450.503	-0.528103	0.258995	-2.03905	0.0414452	0.318101	436.208	371.001	342.104	447.708	655.497
9930014A18Rik	17.249	-1.83594	0.900738	-2.03826	0.041524	0.318173	7.43536	13.3774	4.50137	30.0475	30.8832
Dock10	393.31	-0.694527	0.340692	-2.03858	0.0414924	0.318173	311.046	389.729	245.325	332.526	687.924
Gja5	308.855	-0.545877	0.267807	-2.03832	0.0415177	0.318173	268.912	289.845	223.943	331.524	430.049
Dip2b	229.208	-0.666683	0.32713	-2.03798	0.0415524	0.318214	216.865	164.097	176.679	219.347	369.055
5330439B14Rik	25.471	-1.51845	0.745662	-2.03637	0.041713	0.318848	19.8276	10.702	13.5041	30.0475	53.2736
Asb13	718.511	-0.479655	0.235537	-2.03643	0.0417067	0.318848	470.906	673.331	716.844	871.377	860.098
Nap1l5	42.2805	-1.23918	0.608568	-2.03622	0.0417279	0.318848	14.8707	36.565	30.3843	60.095	69.4873
Pus7l	143.238	0.749885	0.368231	2.03645	0.0417049	0.318848	161.099	154.286	198.06	76.1203	126.621
Elk1	499.361	-0.509923	0.250465	-2.03591	0.0417597	0.318914	513.04	338.003	431.007	563.891	650.864
Plat	97.7954	-0.849129	0.417323	-2.0347	0.0418809	0.319661	50.8083	82.0483	88.9021	145.23	121.989
1700019E19Rik	1196.85	0.428946	0.210924	2.03365	0.0419873	0.319696	1128.94	1477.76	1394.3	1117.77	865.503
4933409K07Rik	1106.31	0.424447	0.208651	2.03424	0.041927	0.319696	1461.05	1193.27	1042.07	872.379	962.785
D330012F22Rik	235.345	-0.556928	0.273835	-2.03381	0.0419708	0.319696	224.3	176.582	193.559	300.475	281.81
Entpd3	43.8753	1.1924	0.586195	2.03413	0.0419386	0.319696	59.4829	54.4016	56.2672	16.0253	33.1995
Polr2j	682.269	0.454008	0.223282	2.03334	0.0420178	0.319696	727.426	800.863	765.234	653.032	464.793
Tceanc	215.25	-0.587558	0.288971	-2.03327	0.042025	0.319696	177.209	206.904	153.047	280.443	258.647
Frmd5	52.1686	-1.80646	0.888827	-2.03241	0.0421124	0.320185	33.4591	17.8366	27.0082	173.274	9.26497
Mpdu1	1082.3	0.378042	0.186043	2.03201	0.0421527	0.320314	1140.09	1144.22	1291.89	987.561	847.745
Gng4	17.4726	-1.99746	0.983377	-2.03123	0.0422317	0.320737	16.1099	3.56732	4.50137	23.0364	40.1482
Tapt1	1468.29	0.374248	0.184268	2.03099	0.0422557	0.320742	1625.86	1729.26	1493.33	1121.77	1371.22
Ccdc53	880.968	0.4122	0.203211	2.02843	0.0425162	0.322542	1029.8	1001.52	902.525	826.306	644.688
Fam101b	407.398	0.579429	0.285764	2.02765	0.0425962	0.32297	593.589	468.21	346.606	347.549	281.037
1700066M21Rik	383.448	-0.587579	0.290037	-2.02588	0.042777	0.323272	307.328	311.248	339.854	346.548	612.26
Fbxo10	579.521	-0.639307	0.315458	-2.0266	0.0427036	0.323272	662.986	346.922	413.001	572.906	901.79
Hist1h2bn	179.797	0.663592	0.327548	2.02594	0.0427711	0.323272	173.492	193.527	265.581	138.218	128.165
Lyplal1	51.5082	1.14904	0.567167	2.02593	0.042772	0.323272	58.2436	57.9689	82.1501	19.0301	40.1482
Txnip	15043.9	1.06805	0.526906	2.02701	0.0426609	0.323272	18048.1	23489	15535.4	5072.02	13075.2
Zbp1	1068.78	-0.486473	0.240117	-2.02598	0.0427665	0.323272	744.775	956.041	1061.2	1533.42	1048.49
Eml5	373.265	-0.558512	0.275752	-2.02541	0.0428252	0.323323	333.352	348.705	259.954	374.592	549.722
Tssc4	671.195	0.436889	0.21571	2.02536	0.0428308	0.323323	672.9	714.355	860.888	595.942	511.89
Ccm2	1874.59	0.474502	0.234384	2.02446	0.0429228	0.323552	1959.22	2031.59	2341.84	1903.01	1137.28
Fmnl3	1946.01	-0.376809	0.186136	-2.02438	0.0429311	0.323552	1824.14	1699.83	1692.52	1944.07	2569.49
Grin3a	4.72204	-4.06788	2.00945	-2.02437	0.0429317	0.323552	0	1.78366	0	11.0174	10.8091
Lxn	728.993	0.380576	0.188036	2.02395	0.042975	0.323701	807.976	767.865	835.005	607.961	626.158
Aars	1984.28	-0.32358	0.159976	-2.02267	0.043107	0.323985	1846.45	1786.33	1775.79	2368.74	2144.07
Cops7a	2086.89	0.319292	0.157854	2.0227	0.0431043	0.323985	2202.11	2211.74	2386.85	1837.9	1795.86
Fam117b	791.272	-0.478049	0.236305	-2.02302	0.0430711	0.323985	700.163	659.062	693.212	741.171	1162.75
Wwc1	264.14	-0.562463	0.278	-2.02325	0.0430471	0.323985	219.343	247.037	199.186	281.445	373.687
Pde4b	63.9893	1.74669	0.863934	2.02179	0.0431984	0.324354	168.535	20.5121	77.6487	47.0744	6.17665
Prr13	2366.75	0.3433	0.169804	2.02174	0.0432032	0.324354	2618.49	2484.64	2653.56	2239.54	1837.55
Gm11201	29.3387	1.65604	0.819287	2.02132	0.0432466	0.324503	68.1574	34.7813	18.0055	18.0285	7.72081
Zbtb34	165.897	-0.746593	0.369479	-2.02066	0.0433145	0.324835	141.272	152.503	97.9049	165.261	272.545
Nuf2	9.50336	-2.72785	1.35094	-2.01922	0.0434641	0.32578	6.19613	2.67549	0	17.0269	21.6183
Dcbld1	97.8612	0.924517	0.457992	2.01863	0.0435255	0.325884	76.832	170.339	114.785	57.0902	70.2594
Nr2f2	128.598	-0.735414	0.364305	-2.01868	0.0435206	0.325884	126.401	91.8584	86.6514	188.298	149.784
Lamb2	2968.1	-0.409897	0.203105	-2.01815	0.0435751	0.326079	3183.57	2313.41	2374.47	3127.94	3841.1
4632411B12Rik	1671.61	-0.441469	0.219088	-2.01503	0.0439012	0.327514	1821.66	1226.27	1340.28	1801.85	2168
Cspg5	4.12226	5.39948	2.67931	2.01525	0.0438785	0.327514	16.1099	0	4.50137	0	0
Cyb5r1	381.915	0.470255	0.233416	2.01466	0.04394	0.327514	441.165	466.427	381.491	305.483	315.009
Fam118a	528.065	-0.431467	0.214084	-2.01541	0.043862	0.327514	472.145	411.133	507.53	627.993	621.525
Fstl1	54590.2	0.289402	0.143653	2.01458	0.0439486	0.327514	61444.6	59661.6	55505.3	46338.2	50001.5
Glt25d2	161.812	-1.12667	0.558859	-2.01602	0.0437974	0.327514	35.9376	87.3993	205.938	284.45	195.336
Hmgcs2	549.779	1.423	0.70619	2.01504	0.0439006	0.327514	775.756	947.123	478.271	422.668	125.077
Zfp709	198.999	-0.653097	0.324199	-2.0145	0.0439575	0.327514	161.099	177.474	147.42	196.31	312.693
Coro7	617.311	-0.442468	0.219769	-2.01334	0.0440793	0.327535	448.6	577.014	593.056	762.205	705.682
D15Ertd621e	1057.99	-0.42453	0.210822	-2.01369	0.0440418	0.327535	1035.99	949.798	806.871	1086.72	1410.59
Dcaf5	814.829	-0.390023	0.193704	-2.0135	0.0440617	0.327535	692.728	788.377	693.212	888.404	1011.43
Pfn1	11237.7	0.383992	0.190703	2.01356	0.0440553	0.327535	12834.7	11397.6	12956.1	11199.7	7800.33
Plac8	2447.54	0.458989	0.227933	2.0137	0.0440411	0.327535	3257.93	2624.65	2357.59	2407.81	1589.71
Gpc3	136.041	-0.801641	0.398329	-2.01251	0.044166	0.327964	122.683	64.2117	128.289	191.302	173.718
Kcna4	27.9063	-2.28061	1.13364	-2.01177	0.0442446	0.327964	4.95691	0	28.1336	50.0792	56.3619
Mx2	24.3965	-1.50828	0.749769	-2.01166	0.0442562	0.327964	13.6315	11.5938	16.8802	52.0823	27.7949
Rpl36al	1780.93	0.358864	0.178364	2.01197	0.0442229	0.327964	2064.55	1842.52	1951.35	1679.65	1366.58
Shank2	52.9552	-1.62745	0.808749	-2.01231	0.0441874	0.327964	11.153	8.02646	67.5206	93.1472	84.9289
Timm13	1184.49	0.497755	0.247472	2.01136	0.0442873	0.328017	1409	1133.52	1479.83	1182.87	717.263
Mob3c	427.197	0.455395	0.22649	2.01066	0.0443616	0.32839	483.298	476.237	477.146	386.611	312.693
A430033K04Rik	265.04	-0.61979	0.308289	-2.01042	0.0443872	0.328392	224.3	158.746	272.333	308.488	361.334
Heyl	9058.33	-0.492176	0.244839	-2.0102	0.0444096	0.328392	9201.26	5684.52	8488.47	13257	8660.43
Zfp13	137.406	0.776852	0.386645	2.00921	0.0445147	0.328992	123.923	195.311	175.554	74.1171	118.128
Xrcc6	430.667	0.435346	0.216792	2.00813	0.0446293	0.329662	499.408	490.506	452.388	353.559	357.473
Itm2a	8056.6	-0.337391	0.16806	-2.00757	0.0446895	0.32993	6315.1	7614.44	7934.8	9673.29	8745.36
Ankle2	1571.65	-0.329684	0.164295	-2.00666	0.0447861	0.330288	1396.61	1423.36	1456.19	1706.7	1875.38
Parm1	198.764	0.781697	0.38955	2.00667	0.0447853	0.330288	205.712	228.308	281.336	194.307	84.1568
Arhgap19	35.8958	-1.49226	0.74382	-2.00622	0.0448331	0.330458	13.6315	34.7813	13.5041	85.1346	32.4274
Nr3c1	2115.55	-0.394756	0.196789	-2.00599	0.0448574	0.33046	2086.86	1731.93	1819.68	2100.32	2838.94
Nxph1	8.32851	-3.28194	1.63646	-2.00552	0.0449079	0.330478	0	0	5.62672	19.0301	16.9858
Tyw3	163.098	-0.835768	0.416706	-2.00565	0.0448934	0.330478	71.8751	178.366	121.537	184.291	259.419
Nox4	56.6001	1.12271	0.560096	2.00449	0.0450172	0.331105	52.0475	59.7526	104.657	41.0649	25.4787
Agmo	1511.47	-0.342676	0.171037	-2.00352	0.0451213	0.331693	1266.49	1459.92	1368.42	1666.63	1795.86
Inpp5f	239.093	-0.566153	0.28277	-2.00217	0.0452667	0.332471	203.233	165.88	232.946	298.472	294.935
Lphn3	53.6914	-1.3882	0.693454	-2.00186	0.0452997	0.332471	50.8083	16.0529	31.5096	38.0602	132.026
Nagk	1337.66	0.336695	0.16821	2.00164	0.0453238	0.332471	1413.96	1513.43	1449.44	1198.89	1112.57
Tspan17	2341.83	0.346585	0.173136	2.00181	0.0453051	0.332471	2321.07	2753.08	2606.3	2166.42	1862.26
Trib2	118.711	-0.870976	0.43545	-2.00018	0.0454813	0.333449	135.076	68.6709	64.1446	181.287	144.379
Agphd1	368.743	-0.590295	0.29519	-1.99971	0.0455313	0.333638	276.347	342.462	301.592	336.532	586.781
Hist1h1e	118.508	0.71635	0.358369	1.99892	0.0456171	0.334053	158.621	138.234	124.913	78.1235	92.6497
Pms1	163.104	-0.778156	0.389323	-1.99874	0.0456365	0.334053	132.597	121.289	127.164	137.217	297.251
Cblb	1411.71	-0.445451	0.222924	-1.99822	0.0456926	0.334285	1523.01	1141.54	1036.44	1488.35	1869.21
Gm10509	178.2	-0.622422	0.311579	-1.99764	0.0457562	0.334428	131.358	145.368	163.175	196.31	254.787
Muc1	101.658	0.863882	0.432462	1.99759	0.0457607	0.334428	169.774	107.02	95.6542	57.0902	78.7522
Mthfs	296.93	0.504956	0.252882	1.9968	0.0458466	0.334877	333.352	317.491	358.985	259.41	215.411
Pts	460.234	0.449319	0.225113	1.99597	0.0459373	0.335362	511.8	570.771	463.641	356.564	398.394
2610008E11Rik	1139.97	-0.389609	0.19533	-1.99462	0.0460841	0.335777	1021.12	1027.39	994.804	1144.81	1511.73
4930528F23Rik	87.1367	-0.836974	0.41963	-1.99455	0.0460919	0.335777	64.4398	80.2646	54.0165	104.165	132.798
Fuk	189.506	-0.624569	0.313119	-1.99467	0.0460789	0.335777	169.774	121.289	176.679	247.391	232.396
Klf16	213.661	0.931824	0.467109	1.99488	0.0460563	0.335777	402.749	126.64	262.205	183.29	93.4218
Specc1l	786.638	-0.516961	0.259439	-1.99261	0.0463041	0.337145	847.631	546.691	620.064	789.247	1129.55
9830147E19Rik	33.4369	-1.68729	0.846888	-1.99235	0.046333	0.337177	3.71768	17.8366	31.5096	33.0522	81.0685
Nfat5	516.819	-0.601455	0.302079	-1.99105	0.0464748	0.337495	588.633	398.648	298.216	565.894	732.705
Rab7l1	869.015	0.380692	0.191201	1.99106	0.0464744	0.337495	869.937	1040.76	962.169	764.208	707.998
Stmn1	389.579	0.524905	0.263627	1.99109	0.0464714	0.337495	442.404	394.189	494.026	365.578	251.698
Traip	29.0787	1.69611	0.851856	1.99107	0.0464727	0.337495	38.416	31.214	50.6405	22.0348	3.08832
A130022J15Rik	586.025	-0.414252	0.208325	-1.98848	0.0467582	0.337856	542.781	543.124	465.892	651.029	727.3
Atp1a1	6591.34	0.521288	0.262168	1.98838	0.0467702	0.337856	10332.7	5060.24	7112.17	4710.45	5741.19
Cdkn1a	1370.35	-0.62412	0.313846	-1.98862	0.0467432	0.337856	1239.23	1212	927.283	2454.88	1018.37
Litaf	4548.14	0.331057	0.166454	1.98888	0.0467147	0.337856	4787.13	5584.64	4491.25	3835.06	4042.62
Mttp	78.2855	-0.841817	0.423189	-1.98922	0.0466766	0.337856	70.6359	51.7261	56.2672	103.163	109.635
Pyhin1	5.82589	-3.09309	1.55521	-1.98886	0.0467171	0.337856	1.23923	0.891829	2.25069	17.0269	7.72081
Rexo2	1897.74	0.332384	0.167148	1.98856	0.0467499	0.337856	1969.13	2069.94	2164.04	1753.77	1531.81
Rnf44	910.259	-0.49929	0.250957	-1.98954	0.0466416	0.337856	1024.84	590.391	729.223	1092.73	1114.11
Tk1	145.703	0.682546	0.342943	1.99026	0.0465624	0.337856	137.554	194.419	182.306	116.184	98.0543
Ttll4	89.2274	-0.924129	0.464378	-1.99004	0.0465871	0.337856	69.3967	84.7238	42.763	97.1536	152.1
Mtmr4	1233.68	-0.50554	0.254279	-1.98813	0.0467974	0.337875	1364.39	751.812	1054.45	1377.18	1620.6
Lin37	298.227	0.486936	0.245145	1.98632	0.0469981	0.338968	330.873	318.383	361.235	244.386	236.257
Rpl6	2802.21	0.376954	0.189761	1.98646	0.0469819	0.338968	3459.92	2961.77	2835.87	2691.25	2062.23
C3	19711	-0.517846	0.260763	-1.98588	0.0470461	0.339136	12150.6	18613.4	19659.7	17645.9	30485.6
Samd5	183.075	-0.694297	0.349676	-1.98555	0.0470839	0.339231	143.75	103.452	193.559	248.393	226.22
Inadl	54.959	-1.29203	0.650794	-1.98532	0.0471092	0.339235	35.9376	12.4856	56.2672	102.161	67.9431
Cbx2	81.3992	1.07545	0.542195	1.98351	0.0473101	0.339972	172.252	68.6709	68.6459	41.0649	56.3619
Dync1i2	949.904	-0.478415	0.24118	-1.98364	0.0472955	0.339972	988.903	741.11	733.724	928.468	1357.32
Hsd17b11	350.984	0.50974	0.256928	1.98398	0.0472579	0.339972	474.624	374.568	346.606	263.416	295.707
Nacad	61.6578	-0.917762	0.462696	-1.98351	0.0473103	0.339972	45.8514	49.9424	40.5124	90.1425	81.8406
Dennd2a	489.552	-0.484661	0.24449	-1.98234	0.0474416	0.340695	487.016	354.056	426.505	520.823	659.357
Eif4a1	7842.89	0.382181	0.192878	1.98146	0.0475393	0.340695	9647.38	7495.83	8800.19	7624.05	5647
Fndc3a	1325.26	-0.419225	0.21161	-1.98112	0.0475779	0.340695	1281.36	1277.99	944.163	1407.22	1715.56
Gnb1	5094.25	0.350006	0.176585	1.98208	0.0474699	0.340695	6545.59	5057.56	5121.44	4375.92	4370.75
Lmtk2	192.443	-0.776761	0.391982	-1.98162	0.0475215	0.340695	201.994	83.832	164.3	233.369	278.721
Nme4	228.128	0.565777	0.285472	1.9819	0.0474903	0.340695	298.654	247.929	239.698	195.309	159.049
Tank	1182.59	-0.379014	0.191319	-1.98106	0.0475844	0.340695	965.357	1217.35	983.55	1346.13	1400.55
Adat3	54.7304	1.08262	0.547106	1.97882	0.0478362	0.340816	89.2243	74.9137	43.8884	37.0586	28.567
Anapc7	732.062	0.37267	0.188261	1.97953	0.0477559	0.340816	784.43	782.134	849.634	627.993	616.121
Cdca8	45.0655	1.30805	0.661175	1.97837	0.0478865	0.340816	35.9376	39.2405	102.406	23.0364	24.7066
Clip4	8.09228	-2.93758	1.48425	-1.97917	0.047797	0.340816	4.95691	1.78366	0	9.01425	24.7066
Dnase2a	152.06	-0.765481	0.386895	-1.97852	0.0478695	0.340816	90.4635	168.556	96.7795	178.282	226.22
Fam26f	207.917	-0.664273	0.335786	-1.97827	0.0478986	0.340816	121.444	190.851	192.434	312.494	222.359
H2-T24	60.1193	-0.937916	0.473899	-1.97915	0.0477994	0.340816	42.1337	39.2405	50.6405	92.1456	76.436
Khdrbs3	105.251	-0.996663	0.503632	-1.97895	0.0478216	0.340816	73.1144	41.916	111.409	102.161	197.653
Rdh13	149.574	0.748732	0.378395	1.9787	0.0478494	0.340816	210.668	166.772	157.548	137.217	75.6639
Rps17	1804.84	0.374422	0.189128	1.97973	0.0477338	0.340816	2238.04	1819.33	1901.83	1690.67	1374.3
Scp2	6648.74	0.344574	0.174025	1.98003	0.0476998	0.340816	6549.31	8400.14	6848.84	5418.56	6026.86
Trpv4	78.7419	-0.966921	0.488491	-1.9794	0.0477705	0.340816	37.1768	84.7238	48.3898	119.188	104.231
Heatr5a	410.437	-0.624679	0.315904	-1.97743	0.047993	0.34092	443.643	274.683	294.84	386.611	652.408
Mre11a	218.245	-0.58194	0.294275	-1.97754	0.0479808	0.34092	220.582	168.556	157.548	260.412	284.126
Pex11c	126.576	0.788358	0.398757	1.97704	0.0480371	0.34092	137.554	176.582	141.793	115.182	61.7665
Rfc2	518.66	0.437893	0.221467	1.97724	0.0480144	0.34092	500.647	644.793	591.931	436.69	419.24
Sys1	1885.22	0.43506	0.219985	1.97768	0.0479649	0.34092	2264.07	1945.97	2102.14	1901	1212.94
Lmf1	901.432	0.381722	0.193132	1.97648	0.0480999	0.34119	905.874	1028.28	1046.57	822.3	704.138
B4galt2	807.851	0.423313	0.214283	1.97548	0.0482135	0.341819	752.21	917.692	1027.44	711.124	630.79
Snai2	13602.2	-0.312981	0.158491	-1.97475	0.0482962	0.342229	12346.4	12138.7	12717.5	13795.8	17012.8
Pi4ka	646.916	-0.56056	0.283925	-1.97432	0.048345	0.342398	658.029	500.316	473.77	577.913	1024.55
6820431F20Rik	3008.02	-0.354799	0.17977	-1.97363	0.0484243	0.342419	2454.91	2935.9	2727.83	3071.86	3849.6
C1qtnf6	2005.44	-0.537092	0.272121	-1.97373	0.0484129	0.342419	2047.2	1310.99	1738.66	3180.03	1750.31
Cltc	4756.98	-0.546969	0.277168	-1.97342	0.0484476	0.342419	5258.04	3296.2	3496.44	4094.47	7639.74
Cst7	4.90725	-3.92196	1.98694	-1.97387	0.0483965	0.342419	0	0	2.25069	13.0206	9.26497
Gpc6	5323.5	-0.368313	0.186669	-1.97308	0.0484859	0.342514	5450.12	4556.36	4301.06	5397.53	6912.44
Chek2	118.054	0.706772	0.358247	1.97286	0.048511	0.342516	152.425	136.45	130.54	75.1187	95.738
Zfp191	1041.55	-0.360798	0.182924	-1.9724	0.0485643	0.342716	1031.04	905.207	869.89	1214.92	1186.69
Pcbp4	838.001	-0.448844	0.2277	-1.97121	0.0486998	0.343169	866.219	710.788	616.688	1120.77	875.54
Serinc3	43495.4	-0.30045	0.152422	-1.97118	0.0487034	0.343169	36686.1	43185.9	39552.4	51339.1	46713.2
Txndc16	731.633	-0.441428	0.223895	-1.97158	0.0486575	0.343169	553.934	596.634	769.735	808.278	929.585
Cc2d2a	290.356	-0.489845	0.248573	-1.97063	0.0487668	0.343293	231.735	266.657	250.952	366.579	335.855
Rai1	458.189	-0.648112	0.328892	-1.97059	0.0487708	0.343293	555.173	247.929	318.472	557.882	611.488
2310003F16Rik	831.967	0.397772	0.201913	1.97001	0.0488369	0.343582	850.109	1009.55	901.4	767.213	631.562
Nrg3	71.2074	-0.906556	0.460238	-1.96976	0.0488664	0.343613	52.0475	40.1323	66.3953	90.1425	107.319
Neurl4	141.217	-0.836386	0.424726	-1.96924	0.0489257	0.343855	166.056	83.832	73.1473	172.272	210.778
Rif1	373.778	-0.489224	0.248629	-1.96768	0.0491045	0.344715	313.524	301.438	351.107	388.614	514.206
Rsbn1	314.769	-0.669152	0.340099	-1.96752	0.0491233	0.344715	209.429	319.275	235.197	276.437	533.508
Sod1	657.431	0.490167	0.249108	1.96769	0.049104	0.344715	960.4	627.848	641.446	537.85	519.61
Nfatc1	512.631	0.512599	0.260704	1.96621	0.0492745	0.3456	691.488	439.672	616.688	370.586	444.719
Poldip2	2358.66	0.368631	0.18761	1.96487	0.0494288	0.346505	2580.07	2818.18	2377.85	2274.6	1742.59
Gm2382	367.647	0.488765	0.248848	1.96411	0.0495171	0.346947	387.878	420.943	436.633	339.537	253.243
5730437N04Rik	756.416	0.52605	0.268063	1.96241	0.0497146	0.348	1099.19	690.276	795.618	712.126	484.867
Mtus1	331.682	-0.593581	0.30248	-1.96238	0.0497179	0.348	251.563	220.282	355.609	344.545	486.411
Id4	7387.14	-0.396469	0.20206	-1.96213	0.0497469	0.348026	5355.94	7101.64	7213.45	9876.61	7388.04
Nudt15	120.332	-0.817937	0.416921	-1.96185	0.0497795	0.348077	58.2436	105.236	112.534	191.302	134.342
Tgm2	14349.2	0.27961	0.142558	1.96138	0.0498345	0.348284	15802.6	14684	15825.7	12369.6	13064.4
Aebp1	1424.22	0.519331	0.265059	1.9593	0.0500775	0.348618	1137.61	1503.62	2219.18	1081.71	1178.97
Aph1a	1901.04	0.336733	0.171888	1.95902	0.0501103	0.348618	2028.61	2042.29	2149.41	1797.84	1487.03
Gpaa1	1478.06	0.354094	0.180702	1.95954	0.0500496	0.348618	1520.53	1706.96	1628.37	1390.2	1144.22
Itgav	4581.71	-0.558402	0.285039	-1.95904	0.0501084	0.348618	5043.65	3246.26	3271.37	3821.04	7526.24
Lhfpl2	1712.82	-0.352766	0.179978	-1.96005	0.0499896	0.348618	1508.14	1657.02	1459.57	2167.43	1771.93
Luc7l2	443.044	0.50741	0.258938	1.95958	0.0500447	0.348618	520.475	503.884	482.772	431.682	276.405
Sgtb	94.9327	0.956102	0.487696	1.96045	0.0499434	0.348618	107.813	117.721	128.289	32.0507	88.7893
Tmem208	812.713	0.427165	0.217995	1.95952	0.0500519	0.348618	929.42	918.584	867.64	791.251	556.67
Zfp747	396.054	0.459322	0.23446	1.95906	0.0501056	0.348618	449.839	403.107	480.522	349.552	297.251
Angpt4	2621.12	0.501619	0.25612	1.95853	0.0501675	0.3487	1950.54	3450.49	3508.82	1877.97	2317.79
Chml	63.2869	-1.15111	0.587754	-1.95849	0.0501729	0.3487	64.4398	46.3751	16.8802	89.1409	99.5984
Ptpn21	218.309	-0.671439	0.343018	-1.95744	0.0502954	0.349199	244.128	127.532	158.673	262.415	298.795
Tbrg1	3802.56	0.317899	0.1624	1.95751	0.0502881	0.349199	4043.6	3997.18	4346.08	3601.69	3024.24
Hs1bp3	511.389	-0.450742	0.230352	-1.95675	0.0503766	0.349429	513.04	391.513	434.383	557.882	660.129
Manba	1017.05	-0.417762	0.2135	-1.95673	0.0503794	0.349429	723.708	988.147	976.798	1284.03	1112.57
Angel1	666.327	0.425675	0.217647	1.95581	0.0504877	0.349828	784.43	791.053	651.574	490.776	613.804
Pprc1	636.524	0.532066	0.272022	1.95597	0.0504686	0.349828	815.411	577.014	785.49	620.982	383.724
Gnai1	2401.67	-0.339864	0.173864	-1.95476	0.0506108	0.350307	2147.58	2384.75	1979.48	2948.66	2547.87
Il12rb1	404.243	-0.502518	0.257053	-1.95492	0.0505925	0.350307	303.61	360.299	374.739	574.909	407.659
Tbcb	1478.23	0.356332	0.182307	1.95457	0.0506334	0.350307	1582.49	1625.81	1650.88	1413.23	1118.75
Zc3h7a	749.391	-0.460057	0.235443	-1.95401	0.0507005	0.350596	594.829	814.24	544.666	844.335	948.887
Cbln1	4531.8	0.543765	0.278397	1.9532	0.0507961	0.350993	7720.38	4001.64	3827.29	3428.42	3681.28
Kdsr	1530.37	0.345223	0.176757	1.95309	0.050809	0.350993	1737.4	1745.31	1536.09	1220.93	1412.14
Pcmtd2	1035.8	0.42488	0.217584	1.95272	0.0508528	0.351119	995.099	1306.53	1159.1	736.164	982.087
Ccr3	24.4343	-1.83309	0.93894	-1.9523	0.0509028	0.351278	26.0238	2.67549	7.8774	50.0792	35.5157
D17Wsu104e	2409.3	0.305593	0.156546	1.9521	0.0509269	0.351278	2536.7	2586.31	2701.95	2199.48	2022.08
Mrpl48	1024.77	0.421675	0.216072	1.95154	0.0509926	0.351555	1142.57	1065.74	1211.99	1005.59	697.961
E130309D02Rik	723.582	0.413184	0.211838	1.95048	0.0511192	0.352251	815.411	803.538	791.116	692.094	515.75
Atp5d	2979.7	0.399688	0.204964	1.95004	0.0511708	0.35243	3483.47	3010.82	3401.91	2988.72	2013.59
[truncated: 13,238 more rows]

## Sheet: CFA+Hel-Ig versus CFA+LTbR-Ig
GeneID	baseMean	log2FoldChange	lfcSE	stat	pvalue	padj	LTbR-Ig 1	LTbR-Ig 2	LTbR-Ig 3	Hel-Ig 1	Hel-Ig 2	Hel-Ig 3
Nfkbie	3048.94	-1.19941	0.151641	-7.90958	2.58262e-15	1.83429e-11	2078.14	1760.22	1710.88	4291.36	3942.36	4510.69
Serpina3g	26365.3	-1.31474	0.166264	-7.90756	2.62472e-15	1.83429e-11	17596.4	13606.6	14156.9	33109.9	42778.8	36943
Ecscr	198.013	-2.16837	0.293359	-7.39153	1.45151e-13	6.76259e-10	91.7415	46.4295	79.6848	323.389	319.291	327.542
Ctps	731.826	-1.42705	0.216954	-6.57766	4.77908e-11	1.66993e-07	517.542	318.861	355.066	1000.91	1164.53	1034.05
Dclk1	1978.48	-0.932748	0.151894	-6.14077	8.21214e-10	2.29562e-06	1263.44	1416.78	1400.34	2407.59	2510.87	2871.86
Irf8	1134.1	-1.05159	0.175223	-6.00147	1.95543e-09	4.55518e-06	777.808	678.007	759.35	1418.98	1377.39	1793.1
Lgi4	198.452	-1.6175	0.271834	-5.95032	2.67626e-09	5.0369e-06	126.643	90.8106	74.9975	281.582	289.136	327.542
Nfkb2	1397.65	-1.04022	0.175177	-5.93813	2.88296e-09	5.0369e-06	923.398	935.418	883.564	2046.08	1523.73	2073.69
Serpina3h	367.438	-1.36264	0.24238	-5.62194	1.8882e-08	2.93237e-05	238.328	193.229	186.322	463.566	679.381	443.803
Ugcg	7447.95	-1.04747	0.190574	-5.49637	3.87694e-08	5.41879e-05	5887.41	4092.62	4591.25	11549.8	8204.9	10361.7
Jup	2854.21	0.882676	0.167976	5.25477	1.48211e-07	0.000188322	3769.38	3202.95	4130.72	2203.47	1742.8	2075.92
Crym	315.174	-1.21372	0.237401	-5.11252	3.17886e-07	0.000370258	186.474	218.492	164.057	368.885	533.926	419.209
Serpina3f	6264.68	-1.20331	0.237942	-5.05715	4.25568e-07	0.000457552	3944.88	3543.66	3894.01	6098.9	12662.6	7444.04
Mt2	524.442	-1.65261	0.330638	-4.99825	5.78517e-07	0.000577566	281.208	254.679	223.821	555.787	1334.82	496.344
Map3k14	669.448	-1.45277	0.29216	-4.97252	6.60883e-07	0.000615811	181.489	426.742	466.391	1040.26	986.255	915.553
Rnd1	59.5654	-2.09189	0.422932	-4.94616	7.569e-07	0.0006612	18.9466	21.1664	28.1241	79.9251	85.1444	124.086
Sphk1	3371.24	-0.88794	0.185367	-4.79016	1.66649e-06	0.00137015	2992.57	1977.35	2126.88	4287.68	4188.04	4654.9
Gas7	148.96	-2.08276	0.438758	-4.74694	2.06519e-06	0.00160362	23.9326	101.735	43.3579	285.271	252.772	186.688
P4ha3	290.321	-1.06885	0.227896	-4.69009	2.73082e-06	0.00200888	208.413	179.573	174.604	324.619	405.323	449.392
Meox1	381.007	-1.55144	0.336973	-4.60405	4.14351e-06	0.00289569	273.23	208.933	98.4342	420.529	534.813	750.105
Il33	112.228	-1.58953	0.348908	-4.55572	5.22066e-06	0.00347473	35.8988	60.768	71.482	137.717	168.515	198.985
Trim47	1564.36	-0.664162	0.153106	-4.33793	1.43828e-05	0.00913765	1294.35	1261.11	1074.57	1999.36	1856.32	1900.42
Rab20	201.564	-1.03897	0.240189	-4.32563	1.52098e-05	0.00924291	127.64	129.047	139.448	245.923	255.433	311.892
Bmper	1015.6	0.716516	0.167194	4.28554	1.82295e-05	0.0102508	1228.54	1196.24	1365.19	684.897	854.104	764.638
Olfml2a	2475.66	0.779387	0.181919	4.28426	1.83352e-05	0.0102508	2486.99	3361.36	3536.6	1859.18	1617.74	1992.08
Enpp2	1271.48	-0.903417	0.218526	-4.13414	3.56285e-05	0.0165577	697.036	929.273	1032.39	1268.97	1996.46	1704.78
Fam134b	275.492	-1.2968	0.313911	-4.1311	3.61029e-05	0.0165577	96.7274	173.428	208.587	359.048	509.979	305.184
Nfkbia	4972.56	-0.830633	0.201259	-4.12718	3.67238e-05	0.0165577	3905	4253.76	2576.87	5952.58	5968.09	7179.1
St6gal1	835.555	0.722787	0.174735	4.13647	3.52682e-05	0.0165577	973.257	1102.7	1046.45	538.572	679.381	672.971
Tagln	296.726	-0.995243	0.240776	-4.13348	3.5731e-05	0.0165577	254.283	175.476	165.229	404.544	418.626	362.197
Tmem37	777.226	1.04416	0.250889	4.16183	3.15708e-05	0.0165577	1498.78	877.381	764.037	532.424	475.389	515.348
Gpr176	3615.2	-0.625795	0.152897	-4.09291	4.25991e-05	0.0186065	2550.81	3052.74	2926.07	3926.17	4737.04	4498.39
Birc3	962.394	-0.642313	0.159098	-4.03723	5.40867e-05	0.0229082	811.713	722.388	720.679	1164.45	1104.22	1250.92
Il12rb1	464.468	0.765423	0.189955	4.02949	5.58985e-05	0.0229792	624.241	585.831	544.904	301.256	358.316	372.258
Tacr1	371.822	-1.03068	0.257076	-4.00925	6.09111e-05	0.0243244	276.222	272.432	182.806	612.349	379.602	507.523
Slamf8	169.802	-1.66619	0.417731	-3.98867	6.64454e-05	0.0257974	146.587	49.8434	48.0453	191.82	257.207	325.306
Gpr81	598.774	0.85085	0.2159	3.94094	8.11643e-05	0.0294469	813.707	710.781	787.474	324.619	423.948	532.116
Spsb1	4393.77	-0.577007	0.146523	-3.93799	8.21657e-05	0.0294469	3417.37	3481.53	3680.74	5378.35	4643.03	5761.61
Thsd4	4396.36	0.680988	0.172399	3.95007	7.81286e-05	0.0294469	4647.9	5047.84	6550.56	3194.55	3259.43	3677.86
C5ar1	407.288	0.759076	0.193337	3.92618	8.63063e-05	0.029928	506.572	520.966	508.577	325.849	320.178	261.587
Ccl7	393.285	-1.50071	0.383017	-3.91814	8.92355e-05	0.029928	358.988	124.95	132.417	603.742	371.62	767.991
Il7	3103.6	0.75811	0.19358	3.91626	8.99317e-05	0.029928	4777.54	3435.78	3489.73	1920.66	2301.56	2696.35
Ccrn4l	141.146	-1.1117	0.286167	-3.8848	0.000102415	0.0329259	94.733	101.735	70.3102	216.413	170.289	193.395
Zmiz1	1674.99	0.674474	0.173749	3.88188	0.000103652	0.0329259	1735.11	2190.38	2252.27	1457.1	1204.44	1210.68
Atp4a	6.78187	-6.31134	1.63728	-3.85476	0.000115842	0.0340594	0	0	0	18.4443	13.3038	8.94313
Ccdc99	12.7632	-4.69479	1.21758	-3.85583	0.000115337	0.0340594	2.99157	0	0	14.7554	23.0599	35.7725
Ccl19	2818.53	-0.87943	0.228281	-3.8524	0.000116967	0.0340594	2462.06	2079.09	1413.23	2930.18	3523.73	4502.87
Tnfrsf21	8938.38	0.625705	0.162166	3.85841	0.000114126	0.0340594	11501.6	10024.7	11015.3	5998.07	6858.56	8232.15
Tnfaip3	449.85	-0.738258	0.192055	-3.84399	0.000121049	0.0345287	313.118	366.656	331.63	509.062	625.279	553.356
Dram1	2795.51	-0.538872	0.140767	-3.82812	0.000129126	0.0360958	2422.17	2104.35	2313.2	3241.27	3471.41	3220.64
Il2rg	325.301	-1.0201	0.267468	-3.81393	0.000136777	0.036764	279.213	180.938	185.15	322.16	491.354	492.99
Parm1	166.481	-1.3139	0.344163	-3.81767	0.000134719	0.036764	100.716	53.9401	133.589	204.116	227.052	279.473
Hoga1	19.0015	2.94977	0.779678	3.78332	0.000154751	0.0400547	50.8567	25.2631	24.6086	6.14809	2.66076	4.47157
Zfp101	88.8833	1.38255	0.365345	3.78422	0.000154193	0.0400547	161.545	103.784	120.699	49.1847	61.1975	36.8904
Pcdhac2	6.60046	-6.26938	1.66081	-3.77488	0.000160082	0.0406813	0	0	0	20.9035	9.75612	8.94313
Rnf19b	1216.62	-0.640879	0.171502	-3.73686	0.00018633	0.046506	1062.01	918.348	871.846	1337.82	1426.17	1683.54
Gpr77	738.808	0.850772	0.230936	3.68402	0.000229585	0.0562967	793.763	909.472	1148.4	659.075	524.17	397.969
Vegfa	4564.22	-0.549959	0.149884	-3.66924	0.000243277	0.0586255	3636.75	3676.12	3800.26	6069.39	4718.42	5484.37
Ninl	711.216	-0.735235	0.201178	-3.65465	0.000257528	0.061008	536.488	637.723	425.376	804.17	909.98	953.561
Hspa8	32045.4	-0.590282	0.162987	-3.62164	0.000292739	0.0665158	30421.3	22911.6	23406.3	37489.8	35839.6	42203.8
Mphosph10	366.047	-0.687572	0.189958	-3.6196	0.000295055	0.0665158	296.165	262.19	283.584	452.499	464.746	437.096
Ube2f	1278.46	-0.670304	0.184806	-3.62707	0.000286659	0.0665158	1186.66	925.176	848.409	1396.85	1608.87	1704.78
Dapk1	4728.31	-0.932042	0.258506	-3.60549	0.000311564	0.0691226	1921.58	3350.43	4484.62	6964.55	6515.32	5133.36
Pla2g5	12.0167	4.48578	1.2531	3.57975	0.000343925	0.07511	8.97471	15.7041	44.5298	0	1.77384	1.11789
Tmem30b	1210.79	0.559234	0.156504	3.57328	0.000352536	0.0758061	1296.35	1446.14	1585.49	977.546	967.63	991.57
Adra2b	191.75	1.63866	0.460168	3.561	0.000369452	0.0780688	234.34	384.409	250.773	185.672	46.1199	49.1872
Ankrd29	736.795	-0.739216	0.207784	-3.55762	0.00037423	0.0780688	534.494	672.545	447.641	806.629	1043.91	915.553
Ctgf	19581.9	0.861355	0.24528	3.51173	0.000445207	0.090623	22303.1	17038.9	36439.4	11767.4	14204.9	15737.7
Prg2	6.69517	-6.30101	1.79494	-3.51043	0.000447377	0.090623	0	0	0	1.22962	22.173	16.7684
Mir1198	551.458	-0.872174	0.250208	-3.48579	0.000490682	0.0979753	435.772	475.902	255.46	641.86	671.399	828.357
Pdlim4	1638.64	-0.629306	0.180966	-3.47749	0.000506135	0.0982535	1401.05	1394.25	1064.03	1720.23	2031.05	2221.25
Slco1a5	1010.8	-0.761184	0.218707	-3.48038	0.000500705	0.0982535	905.448	594.707	752.319	1057.47	1565.41	1189.44
Id2	332.735	-1.01207	0.292436	-3.46084	0.000538497	0.103104	282.205	245.12	133.589	345.523	486.919	503.051
Fxyd5	273.692	-0.783042	0.228017	-3.43414	0.000594437	0.112276	215.393	182.304	206.243	402.085	343.238	292.888
Tk1	123.726	-1.13544	0.331729	-3.4228	0.000619787	0.115504	56.8398	103.101	71.482	136.488	193.349	181.098
Cd276	763.357	0.641748	0.188357	3.40709	0.000656601	0.120532	802.738	943.611	1044.11	644.32	512.64	632.726
Pard6b	17.0248	-4.59587	1.35013	-3.40402	0.000664015	0.120532	1.99438	0	2.34367	0	40.7983	57.0125
Ckap2	15.1893	-3.62674	1.06981	-3.39009	0.000698707	0.1244	0	6.14508	0	30.7404	36.3637	17.8863
Rnf111	709.209	0.555316	0.163889	3.38836	0.000703129	0.1244	776.811	884.209	870.674	582.839	560.534	580.186
Icam1	3570.33	-0.600472	0.17809	-3.37174	0.000746945	0.130501	3112.23	2686.08	2716.32	3381.45	4703.34	4822.58
Mt1	1242.57	-0.971834	0.289043	-3.36225	0.000773107	0.132465	1032.09	748.334	738.257	1034.11	2536.59	1366.06
R3hdml	12.0224	4.39764	1.30851	3.36081	0.000777141	0.132465	44.8735	15.7041	8.20285	0	0	3.35367
Sod2	2592.71	-0.494994	0.148323	-3.33727	0.00084607	0.142476	2246.67	2258.66	1949.93	3265.86	3010.21	2824.91
Eda	1965.84	0.686595	0.2063	3.32814	0.000874279	0.144926	2003.35	2427.99	2842.87	1902.22	1337.48	1281.1
Igj	195.001	-3.88676	1.16864	-3.32589	0.000881354	0.144926	22.9354	36.8705	14.062	655.386	419.513	21.2399
Spg11	314.288	0.676684	0.203789	3.32052	0.0008985	0.146027	365.969	426.742	366.785	249.612	247.451	229.168
Id3	17756.7	-0.546188	0.16472	-3.31586	0.000913618	0.146777	12510.7	16502.3	14290.5	19504.2	19615.1	24117.4
1110012J17Rik	7.86013	5.34463	1.61505	3.30927	0.000935412	0.148571	14.9578	26.6287	4.68734	0	0.88692	0
Ccar1	796.763	-0.655201	0.198462	-3.3014	0.000962052	0.150595	571.39	613.825	672.634	761.133	1121.95	1039.64
Cib1	2110.36	-0.641586	0.194469	-3.29917	0.000969701	0.150595	2134.98	1457.75	1353.47	2556.37	2564.97	2594.63
Foxs1	551.374	-0.927014	0.281301	-3.29546	0.000982614	0.150923	222.373	411.038	507.405	736.541	832.818	598.072
Fbrsl1	896.538	-0.695671	0.21276	-3.26975	0.00107641	0.158368	542.471	863.042	645.682	1185.35	949.892	1192.79
P2ry14	6880.49	0.500387	0.153025	3.26996	0.00107561	0.158368	8046.32	8256.26	7882.94	5022.99	5459.88	6614.56
Trak1	533.585	0.593224	0.181139	3.27497	0.00105673	0.158368	585.35	664.351	674.977	467.255	402.662	406.912
Vnn1	49.3473	-1.54915	0.472808	-3.27649	0.00105105	0.158368	12.9635	30.7254	31.6396	72.5474	83.3705	64.8377
Adamts14	949.487	-0.542651	0.166145	-3.26613	0.00109027	0.158736	798.749	718.974	801.536	1264.05	1057.21	1056.41
Rasgef1b	10.1601	-3.86446	1.19499	-3.23389	0.00122118	0.175963	2.99157	0	1.17184	22.1331	25.7207	8.94313
Pdzrn4	1714.74	-0.468366	0.145355	-3.22223	0.00127197	0.181412	1360.17	1414.05	1543.31	1889.92	2062.09	2018.91
Zfp334	108.68	1.12028	0.351458	3.18752	0.00143496	0.202591	142.598	147.482	157.026	40.5774	72.7275	91.6671
Smoc1	7596.05	0.500095	0.157163	3.18201	0.00146257	0.204424	7395.16	9599.3	9703.97	6523.12	6353.9	6000.84
Adamts15	785.353	1.00778	0.317276	3.17635	0.00149141	0.206391	682.078	871.918	1594.87	379.952	736.144	447.157
Sned1	2259.71	0.921128	0.290647	3.16924	0.0015284	0.209435	1720.15	3896.66	3254.19	2021.49	1040.36	1625.41
Ccdc122	277.746	-0.796886	0.252199	-3.15975	0.00157904	0.211862	230.351	218.492	159.37	280.353	365.411	412.502
Gas1	3897.17	0.482985	0.152967	3.15745	0.00159158	0.211862	4587.07	4649.78	4393.21	2936.33	3061.65	3755
Thrb	126.381	0.987308	0.312463	3.15976	0.00157898	0.211862	137.612	156.358	210.93	68.8586	98.4482	86.0776
Emcn	111.848	1.12808	0.358941	3.1428	0.00167339	0.220651	148.581	139.288	173.432	68.8586	98.4482	42.4799
Niacr1	496.267	0.654469	0.208607	3.13733	0.00170495	0.222711	666.123	506.628	648.025	450.04	342.351	364.433
Adora2a	673.528	-0.766165	0.245947	-3.11516	0.00183846	0.237927	492.612	663.669	337.489	860.732	752.108	934.557
Megf10	143.874	1.01491	0.326456	3.10889	0.00187794	0.23882	139.607	191.863	246.086	116.814	98.4482	70.4272
Thbs1	3527.23	0.682299	0.219485	3.10864	0.00187953	0.23882	3190.01	3973.14	5876.76	2542.85	3043.02	2537.61
Cstb	2448.06	-0.461604	0.148917	-3.09973	0.00193695	0.243898	2302.51	1956.18	1920.64	2734.67	2792.91	2981.42
Pcdhgb2	390.234	0.72185	0.233992	3.08494	0.00203594	0.254074	378.932	477.951	601.152	323.389	305.101	254.879
Zfp948	264.353	-0.642355	0.208607	-3.07926	0.00207512	0.256673	213.399	202.105	203.899	311.093	311.309	344.311
Ppip5k1	176.366	1.20296	0.391963	3.06906	0.00214735	0.263277	169.522	243.072	324.599	174.606	86.0313	60.3661
Relb	1203.32	-0.589696	0.192619	-3.06146	0.00220258	0.2677	1193.64	824.123	864.815	1599.73	1378.27	1359.36
Cds1	167.431	0.848708	0.277909	3.05391	0.00225883	0.269843	235.337	248.534	161.713	109.436	127.717	121.85
Htra3	7803.52	0.435738	0.142663	3.05432	0.00225568	0.269843	9482.28	8970.45	8465.34	6676.82	5982.28	7243.94
Rbm25	785.952	-0.484886	0.160131	-3.02805	0.00246134	0.291544	626.235	645.916	693.727	871.799	914.415	963.622
Rab32	1905.34	-0.455365	0.150754	-3.02058	0.00252292	0.296326	1733.12	1522.61	1566.74	2102.65	2414.2	2092.69
Sync	212.564	-0.699165	0.231855	-3.01552	0.00256535	0.2988	163.539	146.116	176.947	277.894	240.355	270.53
Ip6k3	87.7882	-1.25712	0.417677	-3.00979	0.00261426	0.301979	31.9101	77.8377	44.5298	158.621	123.282	90.5492
Aldh4a1	415.953	0.637987	0.212498	3.00231	0.00267937	0.306963	485.631	490.241	542.56	386.1	262.528	328.66
Atp1b2	82.2095	1.17046	0.391847	2.98703	0.00281701	0.313769	70.8005	149.53	120.699	52.8736	43.4591	55.8946
Dsg2	5.57313	-5.02607	1.68145	-2.98912	0.00279781	0.313769	0.99719	0	0	6.14809	10.643	15.6505
Foxq1	12.3829	-3.44798	1.15233	-2.99218	0.00276995	0.313769	0.99719	4.77951	0	22.1331	40.7983	5.58946
Slc22a5	1711.66	0.509504	0.170782	2.98336	0.00285102	0.313769	2321.46	1784.12	1927.67	1478	1507.76	1250.92
Srsf11	1602.35	-0.41354	0.138506	-2.98571	0.00282918	0.313769	1388.09	1378.55	1355.81	1833.36	1783.6	1874.7
Hp	214246	-0.514332	0.172644	-2.97915	0.0028905	0.315629	167733	166874	194760	235446	307447	213215
Dapp1	284.303	-0.636865	0.214091	-2.97473	0.00293242	0.317725	228.356	220.54	219.133	296.338	368.072	373.376
Adm	673.672	-0.630911	0.212573	-2.96798	0.00299765	0.322294	416.825	572.175	597.636	711.949	967.63	775.817
Serpina3c	4334.96	-0.831797	0.280683	-2.96348	0.00304183	0.324547	2244.67	3355.9	3756.91	3942.15	8483.39	4226.75
Klf11	650.47	0.57686	0.195251	2.95446	0.00313218	0.331655	640.196	787.936	908.173	537.343	478.05	551.12
Thbd	4938.79	0.609252	0.206443	2.95119	0.00316552	0.332665	5429.7	5506.67	6961.88	5096.76	3096.24	3541.48
Rapgef3	897.484	0.585392	0.198602	2.94757	0.00320282	0.334073	886.502	1165.52	1180.04	704.571	839.027	609.251
Atp12a	76.4721	1.20492	0.409282	2.94398	0.00324025	0.335474	71.7977	92.859	155.854	38.1181	48.7806	51.423
Haus6	149.281	-0.781057	0.265587	-2.94087	0.00327292	0.336365	96.7274	127.681	104.293	196.739	188.027	182.216
Pak3	232.025	-0.825036	0.281113	-2.9349	0.0033366	0.340407	134.621	223.271	142.964	253.301	280.267	357.725
Pgd	4392.96	0.403073	0.137778	2.92552	0.00343877	0.346013	5438.67	4606.08	4963.9	3809.35	3753.45	3786.3
Trim8	3436.88	-0.418157	0.142944	-2.92532	0.00344107	0.346013	2867.92	3116.24	2841.7	3661.8	3829.72	4303.88
Has2	59.4401	-1.47652	0.507246	-2.91086	0.00360436	0.358673	24.9297	17.7525	52.7326	78.6955	123.282	59.2482
Trpc3	35.5857	1.85747	0.638381	2.90965	0.00361829	0.358673	87.7527	51.8918	28.1241	6.14809	23.9469	15.6505
Cyp4f17	57.5573	1.27144	0.438491	2.89958	0.00373666	0.366056	80.7724	94.9073	67.9665	49.1847	30.1553	22.3578
Mast3	538.412	0.710865	0.245222	2.89887	0.00374515	0.366056	582.359	617.239	805.051	545.95	325.5	354.372
Hhip	122.674	-0.954259	0.330126	-2.8906	0.00384513	0.373218	70.8005	77.1549	103.122	126.651	143.681	214.635
Bcl6	648.483	0.742134	0.257587	2.8811	0.00396295	0.382001	518.539	884.209	1032.39	437.744	447.895	570.125
Arhgef10l	1876.62	0.487826	0.169601	2.87632	0.00402342	0.382862	1879.7	2182.87	2510.07	1726.38	1491.8	1468.91
Stil	5.30983	-5.95323	2.06992	-2.87606	0.00402667	0.382862	0	0	0	18.4443	0	13.4147
Gtf3c1	439.843	0.708901	0.246962	2.87048	0.00409845	0.387054	404.859	658.206	573.028	413.151	293.571	296.241
Atg14	475.463	0.557593	0.195804	2.84772	0.0044034	0.410309	591.334	478.633	629.276	408.233	361.864	383.437
Dixdc1	285.115	0.739167	0.259564	2.84772	0.00440334	0.410309	477.654	297.012	295.303	200.428	206.652	233.639
Spon2	2160.01	0.711316	0.250432	2.84036	0.00450623	0.41711	3472.21	1886.54	2688.19	1223.47	1564.53	2125.11
Bmp6	13356.7	0.40629	0.143577	2.82976	0.00465827	0.428347	15248	14359	16069.4	10449.3	11194.7	12820
Sh2d4a	503.527	-0.581104	0.205514	-2.82756	0.00469043	0.428484	400.87	396.016	413.658	516.439	550.778	743.398
G0s2	1348.24	0.509572	0.180467	2.82363	0.00474825	0.43095	1794.94	1577.24	1378.08	1292.33	996.012	1050.82
Bmf	429.977	0.952466	0.338888	2.81056	0.00494552	0.445641	306.137	812.516	581.231	403.315	268.737	207.928
Dmd	25.9724	-2.6349	0.938112	-2.80872	0.00497389	0.445641	2.99157	17.7525	0	81.1548	20.3992	33.5367
Apip	755.109	-0.487916	0.17411	-2.80235	0.0050732	0.451644	615.266	625.433	644.51	1002.14	776.942	866.366
Gm17769	31.8184	1.45258	0.519785	2.79459	0.00519662	0.459704	47.8651	43.0156	49.2171	12.2962	19.5122	19.0042
Pdlim1	1920.28	-0.442166	0.158468	-2.79026	0.00526665	0.462968	1712.17	1584.06	1589.01	2360.87	2379.61	1895.94
Lmcd1	1554.96	-0.54432	0.195604	-2.78277	0.00538973	0.470826	1058.02	1256.33	1482.37	1518.58	2158.76	1855.7
Dnajc21	268.148	-0.599183	0.216586	-2.76649	0.00566634	0.491915	217.387	189.132	234.367	320.93	344.125	302.949
Fabp5	195.638	-0.779031	0.281873	-2.76377	0.00571377	0.492972	108.694	177.525	145.308	266.827	277.606	197.867
Ebf2	561.579	0.502429	0.183454	2.73871	0.00616798	0.522484	708.005	581.734	686.696	458.647	502.884	431.506
Nostrin	49.2034	-1.15639	0.421632	-2.74266	0.00609444	0.522484	29.9157	30.0426	31.6396	52.8736	73.6144	77.1345
Usp43	115.182	0.937955	0.342322	2.73998	0.00614432	0.522484	102.711	159.772	192.181	66.3993	94.0136	76.0166
Ptger3	92.3767	-1.13931	0.41749	-2.72895	0.00635373	0.534976	50.8567	71.6926	50.3889	67.629	186.253	127.44
Fam26e	2294.58	-0.464871	0.170795	-2.72181	0.00649263	0.543399	2281.57	1858.55	1644.09	2450.63	2789.36	2743.31
Asb4	442.411	0.629183	0.231916	2.71297	0.00666823	0.55149	560.421	438.349	614.042	411.922	359.203	270.53
Gypc	5067.92	-0.445368	0.164135	-2.71343	0.00665912	0.55149	4342.76	4403.97	4129.55	4834.86	6810.66	5885.7
Adra2c	86.5582	1.75068	0.646417	2.70829	0.00676314	0.556049	262.261	79.2032	58.5918	29.5108	11.53	78.2524
Ptpn1	5354.92	-0.473727	0.175353	-2.70156	0.00690156	0.563156	5125.56	3780.59	4545.55	5849.29	5573.41	7255.11
St3gal2	1643	0.407519	0.150923	2.70018	0.00693016	0.563156	1957.48	1950.72	1710.88	1462.02	1309.09	1467.79
Glipr2	2083	-0.461752	0.171313	-2.69537	0.00703111	0.564925	1906.63	1413.37	1939.39	2437.1	2313.09	2488.43
Tifa	4996.28	-0.408335	0.151526	-2.69482	0.00704272	0.564925	3996.74	4386.22	4499.85	5009.46	6370.75	5714.66
Tnip1	1275.48	-0.577998	0.214599	-2.69338	0.00707318	0.564925	768.833	1054.22	1248.01	1249.29	1678.05	1654.48
Best1	681.466	0.530234	0.197348	2.6868	0.00721407	0.569667	801.741	697.125	918.719	464.795	591.576	614.84
Pus10	296.219	0.544338	0.20251	2.68796	0.00718901	0.569667	340.042	343.442	371.472	232.398	256.32	233.639
Ermp1	3765.8	0.499113	0.186082	2.68223	0.0073134	0.571058	4634.94	3377.06	5221.7	3119.54	2878.94	3362.62
Zbtb6	329.571	0.668292	0.249135	2.68245	0.00730845	0.571058	423.806	345.49	445.298	285.271	295.344	182.216
Cdh19	10.2363	3.61026	1.34773	2.67878	0.0073891	0.573764	3.98876	23.2147	29.2959	4.91847	0	0
Enpp1	2428.9	0.45404	0.169651	2.67632	0.00744366	0.574807	2888.86	2347.42	3188.57	2084.2	1859.87	2204.48
Cdc45	41.3135	-1.39909	0.52407	-2.66966	0.00759278	0.576038	11.9663	27.9943	28.1241	40.5774	62.0844	77.1345
Mpzl1	7324.64	0.378553	0.141896	2.66783	0.00763432	0.576038	8521.98	7981.78	8337.61	5675.91	6468.31	6962.23
Panx1	841.092	-0.517506	0.194267	-2.66389	0.00772418	0.576038	780.8	721.023	573.028	850.895	999.559	1121.25
Prps1	1284.95	-0.417792	0.156896	-2.66285	0.0077481	0.576038	1075.97	1107.48	1117.93	1409.14	1648.78	1350.41
Rgs19	381.995	-0.528664	0.198364	-2.66512	0.00769599	0.576038	349.016	318.179	270.694	450.04	469.181	434.86
Slco2b1	187.037	-0.843321	0.316446	-2.66498	0.00769934	0.576038	152.57	78.5205	172.26	226.25	258.981	233.639
Tmem178	2227.44	0.504798	0.188887	2.67248	0.00752933	0.576038	3124.2	2506.51	2207.74	1896.07	1544.13	2085.99
Aspa	158.882	0.676209	0.254123	2.66095	0.007792	0.576237	212.401	201.422	172.26	122.962	122.395	121.85
Il15	840.247	-0.502787	0.189135	-2.65836	0.00785229	0.577639	772.822	581.051	733.569	873.028	972.065	1108.95
Ahsa2	619.886	-0.551499	0.20814	-2.64965	0.00805749	0.579302	633.216	431.521	444.126	708.26	700.667	801.528
Gfra1	824.507	0.73258	0.276584	2.64867	0.00808094	0.579302	712.991	794.764	1581.98	597.594	661.643	598.072
Sh3bgrl2	4.3809	-5.68243	2.14325	-2.65132	0.00801787	0.579302	0	0	0	14.7554	11.53	0
Sos2	449.049	0.523317	0.197508	2.64959	0.00805888	0.579302	527.513	486.827	574.2	397.166	313.97	394.616
Tmeff2	447.621	0.609583	0.230151	2.64862	0.00808213	0.579302	589.339	475.902	558.966	271.745	444.347	345.428
Ckb	3253.33	0.599181	0.226644	2.6437	0.00820041	0.582391	4904.18	3830.43	3023.34	2015.34	2431.05	3315.67
Tmod2	133.546	-0.749744	0.283632	-2.64337	0.00820856	0.582391	89.7471	92.1762	117.184	183.213	144.568	174.391
Prrg1	475.678	-0.528797	0.200267	-2.64047	0.00827923	0.584438	321.095	393.285	454.672	559.476	584.481	541.059
Bloc1s3	429.169	0.56302	0.213567	2.63626	0.00838246	0.585808	547.457	572.175	414.83	329.537	317.517	393.498
Fgf1	316.137	-0.677772	0.256948	-2.63778	0.00834514	0.585808	169.522	294.281	264.835	416.84	334.369	416.973
Eif1a	1440.81	-0.504518	0.191787	-2.63061	0.00852309	0.587903	1371.14	973.654	1231.6	1588.67	1979.61	1500.21
Megf6	40.0947	-1.49312	0.567728	-2.62999	0.00853863	0.587903	7.97752	24.5803	30.4677	81.1548	50.5545	45.8335
Rgs4	1340.3	0.811484	0.308506	2.63037	0.00852925	0.587903	953.313	1682.39	2486.64	1325.53	721.953	871.955
Ccdc65	4.42691	-5.69795	2.16941	-2.6265	0.00862673	0.589554	0	0	0	0	5.32152	21.2399
Gal3st1	324.367	0.575611	0.219498	2.6224	0.00873132	0.589554	323.089	457.467	383.19	268.057	248.338	266.058
Lrrc24	30.8568	1.42292	0.542383	2.62347	0.00870391	0.589554	39.8876	34.1393	60.9355	17.2146	15.0776	17.8863
Spry1	11404.9	0.463576	0.176733	2.62303	0.00871517	0.589554	10919.2	13093.8	15653.4	9137.29	10947.3	8678.19
Stard13	903.546	0.648592	0.248012	2.61516	0.0089185	0.599298	758.861	1068.56	1482.37	838.599	611.088	661.792
Srgn	1814.14	-0.459474	0.176308	-2.60608	0.00915839	0.612473	1819.87	1300.03	1463.62	2245.28	1917.52	2138.53
Kcnk5	3.80984	5.29181	2.0343	2.6013	0.00928725	0.61719	5.98314	15.7041	1.17184	0	0	0
Zfp558	55.6898	1.05303	0.404981	2.60019	0.00931724	0.61719	57.837	81.9344	85.544	39.3478	33.703	35.7725
Cenpe	10.7295	2.85219	1.09841	2.59666	0.00941344	0.61983	9.9719	25.2631	21.093	2.45923	0	5.58946
E230016M11Rik	345.258	0.659178	0.253971	2.59548	0.00944579	0.61983	306.137	407.624	555.45	261.909	290.023	250.408
Saa2	7.69143	-3.38447	1.30817	-2.58719	0.00967633	0.631991	1.99438	0	2.34367	7.3777	26.6076	7.82524
Hspa1b	81.9606	-1.15918	0.448965	-2.5819	0.0098257	0.638762	70.8005	27.9943	53.9045	94.6805	78.9359	165.448
Ptgir	141.706	-1.10565	0.429014	-2.57718	0.00996099	0.641589	38.8904	148.847	80.8567	154.932	172.949	253.761
Sfrp4	75073.6	0.542423	0.210382	2.57827	0.00992958	0.641589	114535	63487.5	89046.6	54362.6	59597.5	69412.1
A830082K12Rik	5.60956	3.92863	1.533	2.56271	0.010386	0.643647	5.98314	11.6074	14.062	0	0.88692	1.11789
Adam12	2188.48	0.574174	0.223426	2.56986	0.0101741	0.643647	1949.51	2645.8	3258.88	2084.2	1365.86	1826.63
Akirin1	1160.9	-0.456686	0.177921	-2.56679	0.0102644	0.643647	1128.82	1005.74	800.364	1398.08	1344.57	1287.81
Arsj	190.433	-0.882107	0.344511	-2.56046	0.0104534	0.643647	146.587	77.8377	179.291	206.576	325.5	206.81
Cyfip2	604.585	0.673536	0.262735	2.56356	0.0103606	0.643647	636.207	529.16	1065.2	468.484	409.757	518.702
Ell	1002.36	0.441451	0.172374	2.56101	0.010437	0.643647	1032.09	1086.31	1346.44	837.369	886.92	825.004
Epor	264.16	0.650539	0.253266	2.56859	0.0102112	0.643647	325.084	402.844	239.055	210.265	198.67	209.046
Paqr8	1133.18	-0.488331	0.190354	-2.56538	0.0103061	0.643647	922.401	781.108	1128.48	1161.99	1380.94	1424.19
Scly	518.37	-0.506202	0.197101	-2.56824	0.0102217	0.643647	369.957	486.144	427.72	683.667	587.141	555.592
Tcirg1	1088.71	0.414443	0.161085	2.57282	0.0100873	0.643647	1373.13	1183.27	1176.52	868.11	997.785	933.439
Bmp4	4606.2	-0.458236	0.179089	-2.55871	0.0105062	0.64406	4431.51	3979.96	3229.58	4965.2	4770.74	6260.19
Il6	34.9609	-1.84931	0.724214	-2.55354	0.0106633	0.644537	5.98314	7.51065	32.8114	24.5923	50.5545	88.3134
Prpf38b	648.232	-0.463389	0.181398	-2.55454	0.0106329	0.644537	556.432	579.003	498.03	841.058	662.53	752.341
Rpp38	139.777	-0.821649	0.321559	-2.5552	0.0106127	0.644537	135.618	73.0582	94.9187	167.228	154.324	213.517
Trp53inp1	739.524	0.684538	0.268194	2.5524	0.0106985	0.644537	630.224	812.516	1293.71	593.905	660.756	446.039
Cxcl13	360.887	-0.962654	0.378124	-2.54587	0.0109007	0.653902	231.348	195.96	308.193	184.443	665.19	580.186
Nrip2	357.881	-0.705563	0.277811	-2.53972	0.0110942	0.662665	272.233	318.179	224.992	308.634	410.644	612.604
Dhx34	623.591	0.526653	0.207594	2.53694	0.0111825	0.665099	590.336	723.071	895.283	564.394	492.241	476.222
Fuca2	4623.47	0.425717	0.168504	2.52645	0.0115223	0.67384	6344.12	4571.94	4987.33	3624.91	4127.73	4084.77
Mx1	10.7345	2.66908	1.05613	2.52722	0.0114968	0.67384	15.955	25.9459	14.062	0	6.20844	2.23578
Papss2	934.832	-0.434541	0.171933	-2.52738	0.0114917	0.67384	919.409	741.506	724.195	1117.72	1012.86	1093.3
Pdzd2	60.47	1.20002	0.474593	2.52852	0.0114544	0.67384	40.8848	114.708	97.2624	33.1997	44.346	32.4188
Dnaja1	3797.43	-0.406417	0.161265	-2.52018	0.0117294	0.68309	3589.88	3116.92	3091.3	3971.66	3983.16	5031.63
Ddx58	1091.08	-0.400096	0.159089	-2.51492	0.0119059	0.690491	981.235	857.58	984.342	1208.71	1174.28	1340.35
4933421O10Rik	245.029	-0.574317	0.228633	-2.51196	0.0120063	0.691146	184.48	221.223	183.978	329.537	288.249	262.704
Sdc3	4298.02	0.517534	0.206052	2.51167	0.0120161	0.691146	3828.21	5318.22	6034.96	3959.37	2823.07	3824.31
Atoh8	419.888	-0.58993	0.235408	-2.50599	0.0122109	0.698408	262.261	425.376	316.396	483.24	454.103	577.95
Pi15	1093.13	0.475005	0.189725	2.50364	0.0122922	0.698408	1314.3	1049.44	1451.9	832.451	857.652	1053.05
Ubash3a	4.48482	4.50903	1.80006	2.50494	0.0122473	0.698408	2.99157	13.6557	9.37469	0	0.88692	0
Ccdc88a	1862.22	-0.498794	0.199733	-2.49731	0.0125141	0.705281	1502.77	1665.32	1462.45	1586.21	2434.6	2521.96
Prdm8	6.00968	3.944	1.57924	2.4974	0.0125109	0.705281	6.98033	23.2147	3.51551	1.22962	0	1.11789
Homer2	4.0458	-4.52965	1.81566	-2.49476	0.0126042	0.707506	0	0	1.17184	8.60732	4.4346	10.061
Itprip	804.957	0.450952	0.18117	2.48911	0.0128062	0.715967	800.743	1029.64	958.562	713.178	722.84	604.779
Sod3	7392.78	-0.460047	0.184969	-2.48717	0.0128766	0.717034	6037.98	5632.31	7004.06	7301.47	10699.8	7681.03
Gtf2e1	462.191	-0.487192	0.196362	-2.48109	0.013098	0.726472	400.87	413.769	338.661	543.491	477.163	599.19
Plcl1	452.953	0.573713	0.231676	2.47637	0.0132728	0.733255	462.696	542.815	621.073	366.426	445.234	279.473
Cspg4	21.0092	2.48164	1.00446	2.47063	0.0134875	0.742185	38.8904	2.73115	65.6228	1.22962	9.75612	7.82524
Zfp423	1978.08	0.44781	0.18144	2.46809	0.0135837	0.744546	1801.92	2638.97	2405.78	1803.85	1585.81	1632.12
Gm5113	145.478	0.683124	0.277603	2.46079	0.013863	0.756889	171.517	151.579	215.618	103.288	117.96	112.907
5730457N03Rik	12.0864	3.77063	1.538	2.45165	0.0142203	0.764488	7.97752	0	59.7636	1.22962	3.54768	0
AI427809	3.75248	-5.46212	2.22868	-2.45083	0.0142527	0.764488	0	0	0	0	7.98228	14.5326
AI467606	120.264	0.830483	0.339072	2.44928	0.0143141	0.764488	145.59	193.229	121.871	116.814	69.1798	74.8987
Ankrd28	466.093	0.728177	0.29677	2.45367	0.0141406	0.764488	392.893	608.363	741.772	496.765	261.642	295.123
Samd4	168.888	0.714525	0.291187	2.45384	0.0141341	0.764488	172.514	270.383	186.322	131.569	146.342	106.2
Smc2	107.593	-0.865332	0.353359	-2.44887	0.0143304	0.764488	97.7246	83.3	46.8734	161.08	117.96	138.619
Chst2	3262.53	0.355052	0.145375	2.44232	0.0145934	0.769703	3688.61	3954.02	3342.08	2734.67	2780.5	3075.32
Gnl3	455.71	-0.532	0.217776	-2.44287	0.0145708	0.769703	438.764	329.786	350.379	436.514	603.106	575.714
Nolc1	554.872	-0.560997	0.229486	-2.44458	0.0145022	0.769703	454.719	441.763	448.813	485.699	638.583	859.658
6030468B19Rik	3.83803	-5.48633	2.24907	-2.43937	0.0147127	0.77153	0	0	0	7.3777	0	15.6505
Spry4	1572.03	0.454078	0.186194	2.43874	0.0147384	0.77153	1536.67	1650.3	2266.33	1384.55	1323.29	1271.04
Foxc1	18020.1	0.388737	0.159783	2.4329	0.0149783	0.776599	20940	19241.6	21117.7	15923.5	12970.3	17927.6
Hmgn3	2184.25	-0.420195	0.172619	-2.43424	0.0149232	0.776599	2026.29	1866.06	1713.22	2043.62	2696.24	2760.07
Ltf	20.6614	-2.88546	1.18629	-2.43233	0.0150019	0.776599	3.98876	8.19344	2.34367	0	13.3038	96.1387
Id1	109.585	-0.735515	0.302945	-2.42788	0.0151873	0.779944	84.7611	88.0795	73.8257	114.354	157.872	138.619
Nr2f1	13.45	2.4793	1.02165	2.42677	0.0152339	0.779944	35.8988	17.0697	15.2339	9.83694	2.66076	0
Trp53	2048.22	-0.408469	0.168295	-2.42711	0.0152198	0.779944	2045.24	1756.81	1477.69	2262.5	2273.18	2473.89
2610028H24Rik	27.0749	1.42343	0.58817	2.42009	0.0155166	0.780385	34.9016	32.091	51.5608	17.2146	17.7384	8.94313
Eif5b	524.42	-0.525379	0.21707	-2.42032	0.0155068	0.780385	356.994	426.742	507.405	506.602	705.989	642.788
Orc2	439.507	-0.489605	0.201911	-2.42486	0.0153144	0.780385	375.941	312.033	410.143	561.935	515.301	461.689
Prdm9	9.33274	2.55963	1.05816	2.41894	0.0155658	0.780385	7.97752	14.3385	25.7804	1.22962	4.4346	2.23578
Sox4	3751.94	0.37954	0.156921	2.41867	0.0155775	0.780385	4516.27	4284.49	3925.65	3344.56	2809.76	3630.91
Srl	119.506	1.00378	0.414146	2.42375	0.0153614	0.780385	181.489	183.67	113.668	78.6955	121.508	38.0083
Rab37	6.36915	3.98456	1.65029	2.41446	0.0157585	0.78663	1.99438	23.2147	10.5465	2.45923	0	0
4933436C20Rik	219.906	0.76818	0.318809	2.40953	0.0159731	0.790525	367.963	226.002	237.883	105.747	164.967	216.871
AU021092	23.4788	1.5943	0.661724	2.40932	0.0159824	0.790525	21.9382	26.6287	57.42	13.5258	12.4169	8.94313
Man1c1	3163.48	0.441472	0.183276	2.40877	0.0160062	0.790525	2962.65	3874.81	4093.22	2596.95	2338.81	3114.45
Tsku	397.885	-0.784018	0.325787	-2.40654	0.0161045	0.79258	371.952	271.066	233.195	727.934	272.285	510.876
Bod1l	372.36	-0.543209	0.22599	-2.40369	0.0162307	0.795986	233.342	312.033	364.441	404.544	455.877	463.925
Acsf2	631.188	0.526279	0.219805	2.3943	0.016652	0.79981	645.182	893.085	694.899	635.712	427.496	490.754
Dgkh	269.807	0.600087	0.250355	2.39694	0.0165324	0.79981	263.258	312.033	400.768	181.983	213.748	247.054
Doc2g	11.3678	2.19819	0.917485	2.39588	0.0165805	0.79981	12.9635	17.0697	25.7804	6.14809	1.77384	4.47157
Lhpp	448.532	-0.421541	0.175763	-2.39835	0.0164691	0.79981	381.924	393.285	374.987	506.602	522.396	511.994
Naf1	97.0107	0.869405	0.362332	2.39947	0.0164189	0.79981	145.59	135.875	93.7469	88.5325	47.8937	70.4272
Sft2d3	319.195	0.501868	0.209586	2.39456	0.0166401	0.79981	415.828	361.877	344.52	291.419	263.415	238.111
Rbm45	46.6265	1.08445	0.453215	2.3928	0.0167205	0.800352	55.8426	71.6926	62.1073	41.807	24.8338	23.4757
Psd	82.3878	-1.05283	0.440366	-2.39081	0.0168111	0.801941	45.8707	68.2787	45.7016	178.295	65.6321	90.5492
Efnb3	139.893	0.895129	0.37472	2.38879	0.0169038	0.802442	232.345	183.67	128.902	110.666	54.1021	129.675
Nrxn1	34.5341	1.20146	0.503107	2.38809	0.0169364	0.802442	49.8595	46.4295	48.0453	27.0516	21.2861	14.5326
Dgkz	497.134	0.450092	0.188934	2.38227	0.0172063	0.812473	539.48	616.556	564.825	452.499	364.524	444.921
Alg6	281.74	-0.515295	0.216896	-2.37577	0.0175126	0.815912	256.278	228.734	210.93	292.649	344.125	357.725
Fam174b	3715.62	0.416625	0.175296	2.37669	0.0174689	0.815912	4806.45	3878.91	4059.24	3205.61	2642.14	3701.34
Il34	6285.71	-0.504256	0.211999	-2.37858	0.0173797	0.815912	4770.56	5602.26	5222.87	6032.5	10076.3	6009.78
Srfbp1	218.164	-0.540167	0.227185	-2.37765	0.0174234	0.815912	162.542	186.401	183.978	275.434	236.808	263.822
Arhgap20	44.659	1.53331	0.646955	2.37004	0.0177863	0.817758	34.9016	120.17	43.3579	43.0366	14.1907	12.2968
D030045P18Rik	9.84328	-3.08404	1.30119	-2.37017	0.0177801	0.817758	0	0.682787	5.85918	19.6739	2.66076	30.1831
Esf1	322.271	-0.554895	0.233885	-2.37251	0.0176677	0.817758	244.312	298.378	240.226	350.441	472.729	327.542
Prdm16	172.618	0.630801	0.265984	2.37157	0.0177125	0.817758	170.519	250.583	207.415	145.095	126.83	135.265
Gadd45a	1185.44	0.639286	0.270092	2.36692	0.0179369	0.818086	887.499	1334.85	2110.48	805.399	1020.85	953.561
Mastl	13.7939	2.18851	0.924319	2.36769	0.0178993	0.818086	23.9326	25.9459	17.5775	11.0666	0.88692	3.35367
Safb	650.176	-0.46357	0.195909	-2.36626	0.017969	0.818086	512.556	538.719	589.433	606.201	791.133	863.012
Arid5a	2664.86	-0.386151	0.1634	-2.36323	0.0181166	0.819251	2398.24	2090.01	2444.45	2579.74	3096.24	3380.5
Clec1a	5.11826	-4.88922	2.06917	-2.36289	0.0181331	0.819251	0.99719	0	0	27.0516	2.66076	0
Tom1l1	150.229	-0.607264	0.257083	-2.36213	0.0181704	0.819251	113.68	112.66	131.246	191.82	180.932	171.037
Adamts3	149.791	0.83716	0.35517	2.35707	0.0184198	0.827757	124.649	271.066	179.291	137.717	79.8228	106.2
Atf4	2666.13	-0.361012	0.153622	-2.35	0.0187736	0.827757	2556.79	2303.04	2143.29	2678.11	3148.57	3166.99
Dkk3	3832.71	0.374676	0.159152	2.35421	0.0185621	0.827757	4577.1	4115.84	4290.09	3003.96	3098.9	3910.38
Itga8	412.318	0.591499	0.251581	2.35113	0.0187167	0.827757	338.047	553.057	596.464	291.419	370.733	324.188
Osbpl5	1913.26	0.333583	0.141699	2.35416	0.0185645	0.827757	2157.92	2004.66	2238.21	1725.15	1618.63	1734.97
Uggt2	188.597	0.719463	0.305808	2.35266	0.0186395	0.827757	209.41	178.207	317.568	146.324	169.402	110.671
Zcchc5	10.7742	2.79573	1.18903	2.35128	0.0187091	0.827757	33.9045	4.77951	17.5775	6.14809	0	2.23578
Utp18	393.707	-0.566339	0.241346	-2.34658	0.0189465	0.832751	375.941	320.227	255.46	400.855	419.513	590.247
Heyl	9142.17	0.446705	0.190883	2.3402	0.0192732	0.844455	10857.4	9829.4	10950.8	9129.91	5653.23	8432.25
Adap1	9.36374	-2.89436	1.24007	-2.33404	0.0195937	0.845242	0	6.14508	0	13.5258	18.6253	17.8863
Cdc42ep2	491.615	-0.672209	0.287858	-2.33521	0.0195325	0.845242	509.564	361.877	264.835	770.97	414.192	628.255
Cybb	3273.45	-0.405612	0.173953	-2.33174	0.0197144	0.845242	2705.38	2458.03	3288.17	3265.86	4225.29	3697.98
Eri2	306.189	0.565919	0.242265	2.33595	0.019494	0.845242	453.721	294.964	348.035	236.087	222.617	281.709
Grtp1	348.964	0.80112	0.343354	2.33322	0.0196368	0.845242	725.954	296.329	308.193	212.724	225.278	325.306
Lrba	305.794	0.531667	0.227816	2.33376	0.0196083	0.845242	404.859	285.405	394.909	259.449	234.147	255.997
Tarsl2	16.989	1.80268	0.773003	2.33205	0.0196979	0.845242	23.9326	14.3385	41.0143	6.14809	5.32152	11.1789
Atf6b	1201.34	0.344128	0.147878	2.32711	0.0199595	0.850529	1334.24	1419.51	1277.3	1040.26	1045.68	1091.06
Eif3a	1228.2	-0.337699	0.145056	-2.32807	0.0199084	0.850529	1060.01	1103.38	1092.15	1316.92	1421.73	1375.01
Mei4	5.27051	-3.90082	1.67771	-2.32508	0.0200677	0.851789	0.99719	0	1.17184	1.22962	20.3992	7.82524
Rnf125	1226.28	-0.39643	0.170561	-2.32427	0.0201109	0.851789	1015.14	987.992	1175.35	1216.09	1555.66	1407.43
Kctd11	4005.05	-0.345832	0.149048	-2.32027	0.0203262	0.85572	4030.64	3235.73	3316.3	4389.73	4577.4	4480.51
Slc39a14	4906.06	-0.384459	0.165658	-2.3208	0.0202975	0.85572	3832.2	3926.71	5010.77	6184.98	5291.37	5190.37
Glyctk	36.4123	1.34317	0.580757	2.31279	0.0207344	0.868937	27.9213	60.0852	69.1383	15.985	31.9291	13.4147
Ppan	290.352	-0.581015	0.251278	-2.31224	0.0207645	0.868937	260.267	213.712	224.992	254.531	423.061	365.55
Errfi1	25090.5	-0.48741	0.21111	-2.3088	0.0209547	0.874279	23318.3	24682.7	14672.6	28545.6	25044.9	34279
Cbfa2t3	659.011	0.58364	0.253013	2.30675	0.0210685	0.875618	533.497	966.143	870.674	652.927	447.895	482.929
Peg3	138.717	0.676021	0.293161	2.30597	0.0211121	0.875618	130.632	172.745	208.587	106.977	99.3351	114.025
Cthrc1	30.2842	-1.75333	0.761184	-2.30342	0.0212552	0.878947	2.99157	7.51065	31.6396	70.0882	33.703	35.7725
Clybl	354.729	-0.475956	0.206998	-2.29933	0.0214863	0.884305	293.174	303.157	294.131	344.293	431.93	461.689
Gja5	322.782	0.57335	0.249403	2.29889	0.0215113	0.884305	299.157	366.656	493.343	266.827	288.249	222.46
Anapc16	1243.15	-0.365597	0.159223	-2.29614	0.0216679	0.886512	1088.93	1181.9	987.858	1313.23	1513.09	1373.89
Paqr9	11.4524	2.75238	1.19929	2.29501	0.0217324	0.886512	24.9297	30.0426	4.68734	1.22962	0	7.82524
St8sia2	612.255	0.654124	0.285069	2.29461	0.0217553	0.886512	406.853	866.456	972.624	493.077	433.704	500.815
Prtg	19.2955	1.6306	0.711364	2.29221	0.0218936	0.889555	44.8735	22.532	19.9212	13.5258	7.09536	7.82524
4632428C04Rik	113.26	0.715579	0.313069	2.28569	0.0222723	0.895019	132.626	115.391	174.604	88.5325	74.5013	93.9029
Abcc9	849.939	0.670029	0.293487	2.28299	0.0224307	0.895019	698.033	1073.34	1359.33	956.642	491.354	520.937
B230312A22Rik	471.47	0.431638	0.188598	2.28866	0.0220989	0.895019	489.62	615.874	517.951	400.855	392.019	412.502
Cldn1	8718.61	-0.596498	0.261293	-2.28287	0.0224381	0.895019	5870.46	5827.58	9128.6	8662.65	15215.1	7607.25
Ctif	324.906	0.531501	0.232631	2.28474	0.022328	0.895019	430.786	404.892	315.224	312.323	223.504	262.704
Gpr135	13.9204	-1.85578	0.8119	-2.28572	0.0222704	0.895019	5.98314	4.09672	8.20285	33.1997	18.6253	13.4147
Hook1	3.70237	5.22425	2.28911	2.28222	0.0224763	0.895019	6.98033	0	15.2339	0	0	0
Mtmr3	1132.2	0.436061	0.191318	2.27924	0.0226527	0.898246	1083.95	1307.54	1514.01	1105.43	839.914	942.382
Pdgfrb	34325.3	0.471141	0.20676	2.27868	0.0226859	0.898246	28441.8	42261.8	48938.2	32904.6	25016.5	28388.9
Aen	460.578	-0.510702	0.225744	-2.26231	0.0236782	0.899322	481.643	309.985	349.207	479.551	598.671	544.413
BC051019	9.72871	-2.55988	1.12825	-2.2689	0.0232746	0.899322	0	6.82787	1.17184	17.2146	18.6253	14.5326
Fads2	498.072	-0.485387	0.213828	-2.26998	0.0232086	0.899322	465.688	388.506	391.393	470.943	567.629	704.272
Fam181b	3.66658	-4.4091	1.94455	-2.26741	0.0233653	0.899322	0.99719	0	0	3.68885	15.0776	2.23578
Gpr137c	3.90667	4.26805	1.88633	2.26262	0.0236589	0.899322	2.99157	4.09672	15.2339	0	0	1.11789
Msx2	4.92127	-3.78112	1.66515	-2.27074	0.0231628	0.899322	0.99719	0	1.17184	3.68885	3.54768	20.122
Nos1ap	366.578	-0.520411	0.229406	-2.26851	0.0232981	0.899322	276.222	288.819	339.832	362.737	538.361	393.498
Peg12	55.0789	0.99327	0.436827	2.27383	0.0229761	0.899322	70.8005	99.6868	49.2171	34.4293	41.6853	34.6546
Pkdrej	3.88078	5.29963	2.33734	2.26738	0.0233672	0.899322	20.941	0	2.34367	0	0	0
Rnf123	742.673	0.388764	0.171731	2.2638	0.0235865	0.899322	787.78	810.468	928.094	702.112	600.445	627.137
Stat5b	3814.22	0.52904	0.232598	2.27448	0.022937	0.899322	5878.43	3501.33	4137.75	2830.58	2494.91	4042.3
Tril	490.186	0.667068	0.294739	2.26325	0.0236205	0.899322	343.033	587.879	874.19	404.544	384.923	346.546
Ubd	4.73995	-3.3595	1.48187	-2.26706	0.0233863	0.899322	0.99719	1.36557	0	7.3777	9.75612	8.94313
Zdhhc14	125.885	0.820118	0.360444	2.2753	0.022888	0.899322	224.368	121.536	135.933	99.599	62.0844	111.789
Zfp317	422.768	0.532855	0.235115	2.26636	0.0234296	0.899322	515.547	444.494	540.216	420.529	365.411	250.408
Pgap1	41.7305	-1.23601	0.547074	-2.25932	0.0238635	0.903902	16.9522	41.65	15.2339	57.792	76.2752	42.4799
Fam82a2	567.489	-0.397803	0.17616	-2.25819	0.0239339	0.90412	532.499	486.827	449.985	604.972	681.155	649.495
Trpv4	81.9482	0.919157	0.407255	2.25696	0.0240109	0.904583	82.7668	111.977	127.73	36.8885	84.2574	48.0693
Fstl3	104.27	-0.722062	0.320235	-2.25479	0.0241465	0.907248	65.8145	86.0311	84.3722	129.11	155.211	105.082
Ccdc89	6.09002	3.01167	1.34042	2.24682	0.0246517	0.916429	6.98033	11.6074	14.062	1.22962	2.66076	0
Coro1a	93.0736	-1.00726	0.449002	-2.24333	0.0248754	0.916429	90.7443	47.1123	48.0453	60.2513	140.133	172.155
Ets2	1008.47	-0.419755	0.186836	-2.24665	0.0246621	0.916429	778.805	758.576	1052.31	1237	1074.95	1149.19
H1f0	3332.42	0.337411	0.150239	2.24583	0.0247148	0.916429	3220.92	4027.08	3912.76	2853.94	2978.28	3001.54
Ncald	1931.53	0.38266	0.170568	2.24345	0.0248681	0.916429	2404.22	2166.48	1987.43	1516.12	1548.56	1966.37
Nt5dc2	1375.33	0.37774	0.168121	2.24684	0.0246505	0.916429	1543.65	1786.85	1331.21	1147.23	1208.87	1234.15
Pdzk1ip1	6.91846	-3.31398	1.47703	-2.24368	0.0248532	0.916429	0	3.41393	0	20.9035	2.66076	14.5326
Prss35	60.1719	-0.916641	0.408739	-2.24261	0.024922	0.916429	51.8539	36.8705	36.3269	97.1398	80.7098	58.1303
Ptk2b	248.637	0.759439	0.338878	2.24104	0.0250237	0.916429	169.522	355.049	413.658	193.05	225.278	135.265
Sac3d1	491.662	-0.492829	0.219946	-2.24068	0.0250466	0.916429	462.696	434.252	326.942	651.697	471.842	602.543
Ankib1	649.231	0.470488	0.210458	2.23554	0.025382	0.921465	671.109	680.738	910.517	627.105	451.442	554.474
Car8	48.6297	-1.19987	0.536712	-2.23559	0.0253787	0.921465	13.9607	25.9459	49.2171	43.0366	82.4836	77.1345
Tgif1	681.339	0.440295	0.196797	2.23731	0.025266	0.921465	756.867	656.841	940.984	623.416	580.046	529.88
Tiam2	325.321	0.632747	0.28318	2.23443	0.0254547	0.921711	256.278	377.581	553.107	276.664	241.242	247.054
Capn5	494.797	0.536018	0.240204	2.23151	0.025647	0.923889	430.786	614.508	711.304	488.158	366.298	357.725
Epm2aip1	741.999	0.374081	0.167588	2.23214	0.0256055	0.923889	797.752	832.317	882.392	711.949	600.445	627.137
Acox1	3355.28	0.378082	0.169842	2.22608	0.0260087	0.924411	3375.49	3631.74	4372.12	2638.76	3349.01	2764.55
Gda	43.4357	-1.04347	0.469111	-2.22436	0.0261245	0.924411	34.9016	22.532	28.1241	40.5774	67.4059	67.0735
Mrps2	584.699	-0.395664	0.177861	-2.22457	0.02611	0.924411	517.542	512.773	485.14	627.105	748.561	617.076
Otud7a	59.5464	-1.11995	0.502647	-2.22811	0.025873	0.924411	20.941	64.8647	25.7804	61.4809	82.4836	101.728
Pcdhga9	31.31	1.18819	0.533404	2.22756	0.0259098	0.924411	30.9129	45.7467	53.9045	22.1331	19.5122	15.6505
Pilra	14.2174	-1.86291	0.835941	-2.22851	0.0258462	0.924411	2.99157	8.19344	7.03102	20.9035	11.53	34.6546
Traf1	86.1015	-0.85547	0.384197	-2.22665	0.0259709	0.924411	88.7499	39.6016	56.2481	99.599	120.621	111.789
E330013P04Rik	46.7792	-1.04335	0.469468	-2.2224	0.0262561	0.926721	39.8876	29.3598	22.2649	51.6439	51.4414	86.0776
1700084C01Rik	43.3168	1.08	0.486873	2.21824	0.0265387	0.92733	39.8876	79.886	56.2481	27.0516	22.173	34.6546
Fam168b	2068.93	0.382399	0.17229	2.21951	0.0264522	0.92733	2005.35	2547.48	2470.23	1995.67	1550.34	1844.52
Gm6710	56.7219	-0.855999	0.385728	-2.21918	0.0264747	0.92733	44.8735	37.5533	38.6706	76.2363	64.7452	78.2524
Tmem150a	1131.27	-0.409295	0.184509	-2.21829	0.0265353	0.92733	980.238	999.6	936.297	1015.66	1443.91	1411.9
Cd93	651.953	0.577452	0.260616	2.21572	0.0267109	0.928635	634.213	944.294	761.693	707.03	359.203	505.287
Snx18	4789.57	0.371526	0.167678	2.21571	0.0267113	0.928635	4492.34	5569.49	6146.28	4472.12	3741.03	4316.18
St7l	680.997	-0.402206	0.181601	-2.21478	0.0267754	0.928635	600.308	506.628	655.056	745.148	839.914	738.926
C2cd2l	284.78	-0.798648	0.361369	-2.21006	0.0271008	0.933439	220.379	163.186	240.226	419.3	161.42	504.169
Mrpl19	404.149	-0.430123	0.194722	-2.20891	0.0271811	0.933439	391.896	331.834	309.365	445.122	477.163	469.514
Prss57	74.3618	-0.91125	0.412389	-2.20968	0.0271271	0.933439	40.8848	66.9131	46.8734	76.2363	139.247	76.0166
Rnf150	287.024	-0.577576	0.261213	-2.21113	0.0270267	0.933439	190.463	261.507	237.883	448.81	274.945	308.538
Aspm	7.67926	3.37667	1.52951	2.20768	0.0272668	0.934087	0.99719	37.5533	3.51551	0	1.77384	2.23578
1110002L01Rik	124.721	0.717058	0.325661	2.20185	0.0276758	0.936623	198.441	113.343	153.511	113.125	81.5967	88.3134
Abcb7	244.444	-0.56163	0.254945	-2.20294	0.0275986	0.936623	227.359	142.702	223.821	282.812	301.553	288.416
Abcg3	4.66068	3.72802	1.69292	2.20213	0.0276559	0.936623	5.98314	6.14508	14.062	0	1.77384	0
Ednrb	77.2279	-1.09414	0.496684	-2.2029	0.027602	0.936623	31.9101	24.5803	92.575	104.517	125.943	83.8419
Nhsl2	940.622	0.594053	0.269515	2.20416	0.0275134	0.936623	810.715	1486.43	1095.67	1019.35	550.778	680.796
5430407P10Rik	66.7596	-1.20797	0.549206	-2.19948	0.0278439	0.940035	52.8511	21.8492	46.8734	40.5774	71.8406	166.566
Itgb5	9720.03	0.379315	0.172589	2.19779	0.0279644	0.941827	9354.64	10682.2	12935.9	7405.99	8450.58	9490.9
Cdkal1	656.947	-0.398238	0.181433	-2.19496	0.0281667	0.944092	520.533	601.535	578.887	673.83	851.444	715.45
Runx2	4161.13	0.477145	0.217377	2.19501	0.0281628	0.944092	4892.21	5889.03	3745.19	4339.32	2705.99	3395.04
Anxa8	3.21845	-5.24778	2.4002	-2.18639	0.0287869	0.945391	0	0	0	2.45923	16.8515	0
Fam134c	1502.73	0.460605	0.210272	2.19052	0.0284866	0.945391	1678.27	1945.26	1596.04	1645.23	980.047	1171.55
Fam171a1	1084.46	0.418022	0.191092	2.18754	0.028703	0.945391	1096.91	1134.11	1490.58	981.235	795.568	1008.34
Fmnl3	2056.49	0.466103	0.212899	2.18932	0.0285736	0.945391	1624.42	2716.81	2815.92	1810	1690.47	1681.31
Grm7	94.7635	0.832465	0.380766	2.18629	0.0287942	0.945391	105.702	99.0041	160.542	49.1847	94.9005	59.2482
Pcdhb12	359.453	-0.526308	0.240752	-2.1861	0.0288082	0.945391	362.977	261.507	258.976	456.188	335.256	481.811
Ptch1	228.302	0.788113	0.360524	2.18602	0.0288142	0.945391	191.46	284.039	391.393	260.679	121.508	120.732
Taf4b	111.633	-0.66042	0.301323	-2.19174	0.0283984	0.945391	79.7752	75.1065	105.465	126.651	137.473	145.326
Tk2	810.022	0.405058	0.185293	2.18604	0.0288128	0.945391	981.235	783.156	1006.61	635.712	784.925	668.499
Col25a1	40.6733	1.72344	0.788761	2.185	0.0288886	0.945613	17.9494	15.0213	154.682	17.2146	21.2861	17.8863
Btbd3	245.566	0.479165	0.219531	2.18268	0.0290596	0.947873	257.275	308.62	291.787	195.509	202.218	217.989
Ccdc94	206.858	0.571475	0.261896	2.18207	0.0291044	0.947873	216.39	290.867	234.367	134.028	167.628	197.867
Cd97	3186.94	0.379349	0.175427	2.16243	0.0305853	0.947873	3433.32	3284.2	4095.57	2391.61	3279.83	2637.11
Chac2	271.011	-0.597264	0.274624	-2.17484	0.0296418	0.947873	305.14	173.428	168.744	330.767	314.857	333.132
D9Ertd402e	124.581	-0.716907	0.331469	-2.16282	0.030555	0.947873	94.733	84.6655	104.293	126.651	216.409	120.732
Epb4.1l1	222.905	0.745685	0.343168	2.17294	0.0297847	0.947873	181.489	415.817	239.055	188.131	116.187	196.749
Fam189a1	628.945	0.600049	0.276124	2.17312	0.0297714	0.947873	564.409	950.439	757.006	697.193	352.994	451.628
Fam69c	1420.93	0.362237	0.166844	2.17111	0.0299232	0.947873	1581.54	1421.56	1794.08	1114.03	1336.59	1277.75
Ftsj3	428.175	-0.458396	0.210619	-2.17642	0.0295238	0.947873	419.817	289.502	373.816	522.587	464.746	498.58
Gm4477	3.21175	5.04224	2.32654	2.16727	0.0302143	0.947873	6.98033	12.2902	0	0	0	0
Heatr2	114.429	0.849754	0.392114	2.16711	0.0302265	0.947873	192.458	142.702	105.465	122.962	51.4414	71.545
Itpkb	121.862	0.870702	0.399723	2.17826	0.0293863	0.947873	90.7443	223.954	157.026	122.962	68.2929	68.1914
Me3	458.716	0.424497	0.194728	2.17995	0.0292609	0.947873	459.705	576.272	541.388	354.13	423.948	396.851
Mtap2	5.90689	2.97144	1.36479	2.17721	0.0294651	0.947873	5.98314	15.0213	10.5465	1.22962	2.66076	0
Nck1	1238.25	-0.398373	0.18392	-2.16601	0.0303105	0.947873	1316.29	966.826	922.235	1358.73	1415.52	1449.91
Nlrc5	268.2	0.564129	0.26063	2.16449	0.0304271	0.947873	276.222	265.604	419.517	204.116	249.225	194.513
Ppat	145.189	-0.722331	0.332143	-2.17476	0.0296481	0.947873	145.59	73.741	110.153	158.621	156.098	226.932
Sfr1	4200.42	-0.295632	0.135707	-2.17846	0.0293722	0.947873	3905.99	3700.7	3708.86	4303.66	4925.07	4658.25
Srek1	568.486	-0.452275	0.208655	-2.16757	0.0301911	0.947873	409.845	447.225	584.746	564.394	701.554	703.154
Sucnr1	85.4192	0.737926	0.341035	2.16378	0.0304811	0.947873	98.7218	115.391	106.637	47.9551	74.5013	69.3093
Wnt11	316.662	0.48113	0.220889	2.17815	0.0293951	0.947873	342.036	433.569	330.458	242.235	255.433	296.241
Xbp1	14473.4	-0.317048	0.146081	-2.17036	0.0299796	0.947873	14538	12042.3	12088.7	14969.4	16115.3	17087
Zbtb46	296.132	-0.494074	0.228394	-2.16325	0.0305216	0.947873	251.292	197.325	290.615	328.308	341.464	367.786
Zfr2	55.9765	0.916573	0.423049	2.16659	0.0302662	0.947873	78.778	55.3057	85.544	36.8885	30.1553	49.1872
Btbd11	141.482	0.801847	0.371022	2.16118	0.0306812	0.948085	118.666	270.383	149.995	73.777	110.865	125.204
Prr7	62.2191	1.32812	0.614706	2.16058	0.0307278	0.948085	116.671	124.95	24.6086	50.4143	14.1907	42.4799
Atp7b	3.36997	5.08756	2.35903	2.15663	0.0310343	0.953432	4.98595	0	15.2339	0	0	0
Slc25a42	137.815	0.757756	0.351368	2.15659	0.0310375	0.953432	161.545	148.847	208.587	143.865	61.1975	102.846
Ivns1abp	798.681	-0.420448	0.195148	-2.15452	0.0311997	0.95422	698.033	594.024	759.35	860.732	1087.36	792.585
Slc7a8	128.861	0.660963	0.306704	2.15505	0.0311579	0.95422	123.652	204.153	145.308	98.3694	105.544	96.1387
Kcnd2	3.25405	5.04344	2.34194	2.15353	0.0312771	0.954499	0	5.46229	14.062	0	0	0
Arrdc3	1002.49	0.713562	0.332386	2.14679	0.0318102	0.960129	944.339	696.442	2096.41	793.103	579.159	905.492
Cacna1g	38.1722	-1.16069	0.540455	-2.14761	0.0317444	0.960129	12.9635	30.7254	26.9522	56.5624	68.2929	33.5367
Tecpr2	91.4672	1.17925	0.549512	2.14599	0.0318738	0.960129	45.8707	206.884	127.73	75.0067	70.9536	22.3578
Tgfbrap1	387.977	0.666297	0.309988	2.14943	0.0316002	0.960129	310.126	574.224	542.56	434.055	233.26	233.639
Tmem189	1085.72	-0.353634	0.164512	-2.1496	0.0315872	0.960129	1070.98	955.218	833.175	1229.62	1238.14	1187.2
Tra2a	491.791	-0.453201	0.210946	-2.14842	0.0316802	0.960129	440.758	442.446	360.925	692.275	513.527	500.815
Ltn1	652.03	0.456605	0.212973	2.14396	0.0320361	0.962945	683.075	805.005	773.412	643.09	410.644	596.954
Parp11	682.444	0.390778	0.182428	2.14209	0.0321863	0.965382	756.867	822.758	741.772	629.564	497.562	646.141
Snhg3	88.9813	-0.740502	0.345921	-2.14067	0.0323009	0.966744	61.8258	86.7139	50.3889	116.814	115.3	102.846
Epb4.1l4b	4966.97	0.299609	0.140258	2.13612	0.0326693	0.97568	5308.04	5470.49	5663.48	4923.39	4276.73	4159.67
Dync2li1	744.282	-0.397475	0.18615	-2.13524	0.0327417	0.975757	665.126	667.083	595.293	699.652	958.761	879.78
9430038I01Rik	182.226	-0.520341	0.244875	-2.12492	0.0335932	0.976468	157.556	130.412	161.713	227.479	200.444	215.753
Ace	258.8	0.892785	0.422046	2.11538	0.0343979	0.976468	140.604	399.43	468.734	282.812	151.663	109.553
Acsl1	289.399	-0.564709	0.267018	-2.11487	0.0344407	0.976468	175.505	267.652	256.632	432.825	334.369	269.412
Apod	9026.84	0.449226	0.212324	2.11576	0.0343653	0.976468	9045.51	8232.36	13987	7990.05	8408.89	6497.18
Col5a3	2838.1	0.488473	0.230483	2.11935	0.034061	0.976468	2342.4	3972.45	3625.66	2627.69	1768.52	2691.88
Coro7	625.918	0.414844	0.194594	2.13184	0.0330199	0.976468	752.878	628.164	766.381	445.122	573.837	589.129
Csf1	19000.6	-0.368321	0.174159	-2.11486	0.0344422	0.976468	13667.5	18188.8	17909.2	18363.1	24410.7	21464.6
Fam55d	93.5445	-0.889642	0.419743	-2.11949	0.0340488	0.976468	49.8595	77.1549	69.1383	195.509	91.3528	78.2524
Filip1l	75.2776	-0.760923	0.357983	-2.12558	0.0335381	0.976468	49.8595	64.8647	52.7326	87.3028	115.3	81.6061
Gcnt4	6.681	-2.98887	1.40513	-2.12711	0.0334111	0.976468	0	4.09672	0	6.14809	14.1907	15.6505
Gfer	331.741	-0.468351	0.219566	-2.13308	0.0329185	0.976468	306.137	272.432	256.632	320.93	384.923	449.392
Glb1l2	13.7946	1.8174	0.85722	2.12011	0.0339971	0.976468	25.9269	11.6074	26.9522	9.83694	6.20844	2.23578
Kif1a	15.283	-1.70154	0.803244	-2.11833	0.0341469	0.976468	9.9719	6.82787	4.68734	34.4293	25.7207	10.061
Kpna2	783.546	-0.514379	0.241911	-2.12631	0.0334772	0.976468	913.426	515.504	507.405	884.095	899.337	981.509
Micall2	649.847	-0.433021	0.203996	-2.1227	0.0337791	0.976468	445.744	590.61	622.245	774.659	638.583	827.24
Mre11a	222.774	0.551931	0.260372	2.11978	0.0340244	0.976468	299.157	284.722	209.759	218.872	167.628	156.505
Mxra7	1041.7	-0.339523	0.160484	-2.11561	0.0343776	0.976468	820.687	961.364	977.311	1115.26	1227.5	1148.07
Ndufaf4	435.723	-0.423546	0.198972	-2.12867	0.0332814	0.976468	403.862	316.813	397.252	461.107	493.128	542.177
Psd4	1049.59	0.40913	0.192703	2.12311	0.0337449	0.976468	939.353	1291.83	1361.67	864.421	995.125	845.126
Scmh1	719.912	0.362256	0.170362	2.12639	0.0334712	0.976468	817.696	740.141	871.846	677.519	586.254	626.019
Sgk1	2527.23	-0.329133	0.154509	-2.13019	0.0331562	0.976468	2451.09	2080.45	2190.16	2503.5	2902	3036.19
Snrk	1518.02	0.317456	0.1494	2.12487	0.0335975	0.976468	1717.16	1569.73	1767.13	1406.68	1394.24	1253.16
Spata5l1	53.5323	-0.896065	0.421757	-2.1246	0.0336199	0.976468	36.896	44.3811	30.4677	61.4809	58.5367	89.4313
Synj2bp	840.248	-0.382889	0.181018	-2.1152	0.0344126	0.976468	651.165	761.99	775.755	812.777	1061.64	978.155
1500015O10Rik	544.508	-0.467249	0.221593	-2.10859	0.0349798	0.978017	467.682	452.688	451.157	479.551	611.088	804.882
Bmi1	996.239	-0.333545	0.158412	-2.10555	0.0352439	0.978017	897.471	809.102	939.812	1062.39	1178.72	1089.94
Cdh15	258.818	0.717705	0.340939	2.10509	0.0352838	0.978017	273.23	229.416	464.047	125.421	188.027	272.765
E4f1	349.469	-0.455778	0.215775	-2.11229	0.0346618	0.978017	297.163	276.529	311.708	367.656	486.032	357.725
Gp5	3.659	4.17531	1.9812	2.10746	0.0350776	0.978017	15.955	1.36557	3.51551	0	0	1.11789
Itga3	380.55	0.468175	0.221787	2.11093	0.0347787	0.978017	392.893	483.413	447.641	391.018	268.737	299.595
Kdsr	1497.75	-0.316868	0.150568	-2.10448	0.0353365	0.978017	1310.31	1421.56	1269.1	1723.92	1735.7	1525.92
Leprel1	3943.03	0.356123	0.169028	2.10689	0.0351271	0.978017	4874.26	4050.29	4358.06	2924.03	3418.19	4033.35
Pax1	3.67762	4.17529	1.97895	2.10985	0.0348709	0.978017	15.955	1.36557	3.51551	1.22962	0	0
Sgk3	371.336	0.448531	0.212869	2.10708	0.035111	0.978017	442.752	349.587	494.515	307.404	305.101	328.66
Zc3h15	1054.08	-0.364424	0.173103	-2.10525	0.0352696	0.978017	1027.11	766.769	972.624	1193.96	1164.53	1199.5
Zfp160	182.373	0.624178	0.296344	2.10626	0.0351815	0.978017	158.553	261.507	243.742	110.666	154.324	165.448
Eif4e3	1606.55	-0.305583	0.145374	-2.10205	0.0355488	0.981947	1549.63	1358.06	1403.86	1743.6	1750.78	1833.34
Hist1h4d	54.0132	0.957797	0.456052	2.10019	0.0357118	0.984504	90.7443	67.5959	55.0763	54.1032	27.4945	29.0652
1700034J05Rik	7.75952	2.5778	1.23018	2.09546	0.0361301	0.984808	9.9719	15.7041	14.062	1.22962	0	5.58946
Acap1	3.69387	-4.41322	2.11223	-2.08937	0.0366744	0.984808	0.99719	0	0	0	8.8692	12.2968
Acot1	40.9587	1.11057	0.530888	2.0919	0.0364471	0.984808	69.8033	51.8918	45.7016	41.807	14.1907	22.3578
Ankrd35	12.941	2.12827	1.01811	2.0904	0.0365815	0.984808	11.9663	13.6557	37.4987	2.45923	0.88692	11.1789
Cdr2	245.065	-0.60451	0.289074	-2.09119	0.0365108	0.984808	280.21	162.503	140.62	300.027	278.493	308.538
Dis3	284.782	-0.440155	0.210363	-2.09236	0.0364061	0.984808	259.269	237.61	228.508	298.797	359.203	325.306
Gprasp1	537.932	0.482878	0.231078	2.08968	0.0366469	0.984808	496.601	639.088	745.288	446.351	359.203	541.059
Hlcs	298.461	0.640709	0.30565	2.09622	0.0360628	0.984808	245.309	484.778	359.754	312.323	211.974	176.627
Lig3	463.65	0.427932	0.204248	2.09516	0.0361567	0.984808	478.651	486.827	631.62	351.671	419.513	413.62
Nacad	65.2249	0.909475	0.435775	2.08703	0.0368856	0.984808	59.8314	64.8647	131.246	45.4958	49.6675	40.2441
Serpinh1	57177.1	0.319234	0.152417	2.09449	0.0362167	0.984808	66185.5	64713.1	59531.6	56017.7	42999.7	53615.2
Sh2d3c	650.865	0.508653	0.243581	2.08823	0.0367769	0.984808	697.036	760.624	834.347	660.305	350.334	602.543
Slc1a6	29.3431	-1.23314	0.590969	-2.08664	0.0369206	0.984808	10.9691	27.9943	12.8902	51.6439	39.0245	33.5367
Slc20a1	183.386	-0.626019	0.299303	-2.09159	0.0364752	0.984808	146.587	183.67	100.778	272.975	199.557	196.749
Slc27a6	1374.93	0.35942	0.171878	2.09113	0.0365168	0.984808	1532.68	1544.46	1557.37	1399.3	1003.99	1211.79
Spnb1	15.3993	2.19746	1.05254	2.08776	0.0368193	0.984808	5.98314	36.8705	32.8114	12.2962	4.4346	0
Sulf1	5978.12	0.398793	0.190995	2.08798	0.0367996	0.984808	5579.28	6029.69	8789.94	5353.75	5304.67	4811.4
Kif4	92.7545	0.784949	0.376438	2.0852	0.0370509	0.986402	144.593	86.7139	120.699	70.0882	46.1199	88.3134
Baz1a	310.257	-0.421843	0.202536	-2.08281	0.0372688	0.986563	256.278	265.604	274.21	351.671	388.471	325.306
Edar	642.891	-0.516555	0.247859	-2.08407	0.0371539	0.986563	381.924	559.202	646.853	570.542	902.885	795.939
Gpr88	11150.3	0.295965	0.14205	2.08353	0.0372033	0.986563	11683.1	13152.5	12034.8	9672.17	11083	9276.26
Nup62	855.926	-0.364404	0.175228	-2.0796	0.0375621	0.992449	789.774	817.296	636.307	1007.06	895.79	989.334
0610005C13Rik	5.57035	-0.235869	1.29061	-0.182758	0.854988	0.999996	0.99719	2.73115	11.7184	8.60732	2.66076	6.70735
0610007C21Rik	5058.01	-0.048558	0.145912	-0.332789	0.739294	0.999996	5518.45	5010.97	4388.53	5041.43	5112.21	5276.45
0610007L01Rik	3146.98	-0.096605	0.138009	-0.69999	0.483933	0.999996	3175.05	2820.59	3129.97	3399.89	3159.21	3197.17
0610007N19Rik	1080.51	-0.0682666	0.190078	-0.359151	0.719482	0.999996	1248.48	1059.68	855.44	1160.76	987.142	1171.55
0610007P08Rik	180.086	0.314363	0.291548	1.07825	0.28092	0.999996	245.309	135.192	219.133	163.539	150.776	166.566
0610007P14Rik	1203.7	-0.137408	0.169244	-0.811894	0.416853	0.999996	1301.33	1023.5	1115.59	1139.86	1299.34	1342.59
0610007P22Rik	291.095	-0.0632099	0.260076	-0.243044	0.807972	0.999996	307.134	326.372	220.305	222.561	332.595	337.603
0610009B22Rik	605.935	0.0286	0.169959	0.168276	0.866366	0.999996	635.21	606.997	594.121	549.639	635.922	613.722
0610009D07Rik	1573.15	-0.137458	0.186129	-0.738507	0.460206	0.999996	1803.92	1429.07	1260.9	1865.33	1511.31	1568.4
0610009L18Rik	83.2715	0.341958	0.442942	0.772015	0.440106	0.999996	134.621	90.1278	53.9045	83.614	43.4591	93.9029
0610009O20Rik	173.998	-0.0667947	0.272555	-0.245069	0.806403	0.999996	153.567	206.202	148.823	210.265	155.211	169.919
0610010B08Rik	5.91414	-0.792052	1.32838	-0.596255	0.551005	0.999996	0	8.19344	4.68734	8.60732	10.643	3.35367
0610010F05Rik	235.106	-0.233193	0.268009	-0.870094	0.384249	0.999996	224.368	162.503	262.491	245.923	214.635	300.713
0610010K14Rik	730.468	0.0327168	0.166304	0.196728	0.84404	0.999996	774.816	730.582	710.133	791.874	676.72	698.682
0610011F06Rik	189.116	0.143618	0.279348	0.51412	0.607168	0.999996	223.371	145.434	227.336	185.672	151.663	201.22
0610011L14Rik	1288.52	0.0113286	0.183551	0.0617193	0.950786	0.999996	1540.66	1065.83	1274.96	1298.48	1184.04	1367.18
0610012G03Rik	798.173	-0.0470497	0.205749	-0.228676	0.819121	0.999996	966.277	785.887	602.324	842.288	758.317	833.947
0610030E20Rik	914.697	-0.0588307	0.159937	-0.367837	0.712995	0.999996	881.516	931.321	874.19	957.872	846.122	997.159
0610031J06Rik	4701.67	0.00890793	0.152522	0.0584043	0.953427	0.999996	4922.13	4828.67	4397.9	4049.13	4866.53	5145.65
0610037L13Rik	991.593	0.0900961	0.193878	0.464704	0.642143	0.999996	1244.49	1017.35	805.051	962.79	938.362	981.509
0610037P05Rik	1661.2	-0.0572628	0.148191	-0.386412	0.699191	0.999996	1746.08	1612.74	1525.73	1605.88	1673.62	1803.16
0610038B21Rik	34.7978	-0.222598	0.561008	-0.396782	0.691528	0.999996	26.9241	38.9188	30.4677	44.2662	51.4414	16.7684
0610038L08Rik	17.1285	-0.232209	0.789361	-0.294173	0.768626	0.999996	11.9663	23.2147	11.7184	33.1997	15.9646	6.70735
0610039K10Rik	297.926	0.179158	0.232751	0.769741	0.441454	0.999996	384.915	315.447	248.429	272.975	278.493	287.298
0610040B10Rik	23.7637	-0.186506	0.680525	-0.274061	0.784038	0.999996	13.9607	12.2902	41.0143	17.2146	30.1553	27.9473
0610040F04Rik	43.8642	-0.435889	0.568582	-0.766624	0.443305	0.999996	61.8258	25.2631	24.6086	65.1697	24.8338	61.484
0610043K17Rik	7.40052	-0.72599	1.12828	-0.643446	0.519935	0.999996	3.98876	10.2418	2.34367	2.45923	14.1907	11.1789
0910001L09Rik	685.18	-0.0492882	0.207884	-0.237095	0.812583	0.999996	825.673	680.738	513.264	686.127	686.476	718.804
100043387	7.32819	-0.429821	1.0393	-0.413567	0.679191	0.999996	6.98033	8.19344	3.51551	3.68885	11.53	10.061
1100001G20Rik	9.52621	0.0617618	1.39254	0.0443521	0.964624	0.999996	9.9719	19.118	0	0	12.4169	15.6505
1110001A16Rik	365.962	-0.13289	0.239783	-0.554207	0.579437	0.999996	399.873	303.84	344.52	411.922	450.556	285.062
1110001J03Rik	388.285	0.0932842	0.228705	0.40788	0.683362	0.999996	490.617	391.92	319.911	384.87	415.966	326.424
1110002B05Rik	2203.9	0.0635011	0.153878	0.412673	0.679846	0.999996	2443.12	2031.97	2283.91	1984.6	2337.92	2141.88
1110002N22Rik	279.384	-0.272205	0.233488	-1.16582	0.243687	0.999996	253.286	259.459	247.257	254.531	377.828	283.944
1110003E01Rik	3361.33	-0.0221646	0.13602	-0.162951	0.870557	0.999996	3517.09	3230.26	3260.05	3231.43	3569.85	3359.26
1110004E09Rik	282.268	-0.258042	0.209095	-1.23409	0.217169	0.999996	268.244	268.335	234.367	284.042	312.196	326.424
1110004F10Rik	2423.97	-0.0748537	0.142553	-0.525094	0.599518	0.999996	2513.92	2331.72	2238.21	2339.96	2643.91	2476.13
1110005A03Rik	551.016	0.00508618	0.21701	0.0234376	0.981301	0.999996	692.05	521.649	441.782	607.431	540.135	503.051
1110006O24Rik	24.1802	-0.180943	0.590606	-0.306368	0.759325	0.999996	20.941	29.3598	17.5775	18.4443	31.9291	26.8294
1110007C09Rik	369.421	0.105845	0.197622	0.535593	0.59224	0.999996	369.957	432.204	345.692	351.671	350.334	366.668
1110008F13Rik	2970.96	0.0580474	0.167964	0.345594	0.729648	0.999996	3612.82	2905.94	2573.35	2778.94	2988.92	2965.77
1110008J03Rik	131.753	0.211147	0.311038	0.678849	0.497234	0.999996	183.483	138.606	101.95	110.666	129.49	126.322
1110008L16Rik	184.678	-0.132932	0.254618	-0.522083	0.601613	0.999996	151.573	182.987	194.525	172.146	223.504	183.334
1110008P14Rik	299.013	0.0665183	0.223066	0.2982	0.76555	0.999996	362.977	279.943	275.381	263.138	317.517	295.123
1110012L19Rik	531.605	-0.163545	0.183014	-0.893622	0.371524	0.999996	481.643	504.579	519.123	490.617	619.07	574.596
1110014N23Rik	726.165	0.137658	0.174501	0.788865	0.430191	0.999996	744.901	813.882	723.023	622.186	674.946	778.052
1110017F19Rik	6.58182	-0.0569632	1.07456	-0.0530109	0.957723	0.999996	7.97752	8.87623	2.34367	7.3777	6.20844	6.70735
1110018G07Rik	1109.32	-0.0405528	0.21322	-0.190192	0.849159	0.999996	1222.55	901.961	1156.6	1423.9	913.528	1037.4
1110018J18Rik	1423.3	0.0642379	0.177624	0.361651	0.717613	0.999996	1383.1	1293.2	1690.96	1243.14	1573.4	1356
1110019D14Rik	41.9234	0.00741226	0.452522	0.0163799	0.986931	0.999996	37.8932	41.65	46.8734	30.7404	49.6675	44.7157
1110020A21Rik	8.62881	0.251457	1.12051	0.224412	0.822436	0.999996	3.98876	5.46229	18.7494	6.14809	1.77384	15.6505
1110020G09Rik	302.602	0.205188	0.248624	0.825293	0.409205	0.999996	291.179	342.076	339.832	201.657	337.917	302.949
1110021J02Rik	528.482	0.0471713	0.175284	0.269114	0.787842	0.999996	529.508	563.982	517.951	489.388	561.421	508.641
1110021L09Rik	753.482	-0.036524	0.169417	-0.215586	0.82931	0.999996	741.909	748.334	740.6	841.058	673.173	775.817
1110028C15Rik	677.663	0.0336085	0.192412	0.17467	0.861339	0.999996	578.37	717.609	760.522	750.067	671.399	588.011
1110031I02Rik	762.102	0.0696293	0.173863	0.400484	0.6888	0.999996	776.811	829.586	734.741	777.118	807.098	647.259
1110032A03Rik	577.516	-0.0337358	0.210886	-0.159971	0.872904	0.999996	586.348	634.992	490.999	470.943	692.685	589.129
1110032F04Rik	4.49779	0.301732	1.99739	0.151063	0.879926	0.999996	14.9578	0	0	0	5.32152	6.70735
1110034A24Rik	353.747	-0.208198	0.214317	-0.971447	0.331326	0.999996	397.879	290.867	296.474	363.967	383.15	390.144
1110034B05Rik	148.774	-0.53381	0.324104	-1.64703	0.0995518	0.999996	131.629	135.875	97.2624	122.962	239.469	165.448
1110034G24Rik	175.435	0.112222	0.301204	0.372578	0.709463	0.999996	215.393	206.884	124.215	135.258	194.236	176.627
1110035M17Rik	6.1901	-0.395904	1.20875	-0.327531	0.743266	0.999996	9.9719	4.77951	1.17184	7.3777	2.66076	11.1789
1110037F02Rik	731.956	-0.0677037	0.237128	-0.285515	0.775249	0.999996	772.822	660.937	710.133	1021.81	679.381	546.649
1110038B12Rik	23.8575	-0.337424	0.627584	-0.537655	0.590815	0.999996	20.941	30.0426	11.7184	28.2812	18.6253	33.5367
1110038D17Rik	752.557	-0.00872037	0.214273	-0.0406975	0.967537	0.999996	812.71	575.589	863.643	732.852	651.886	878.663
1110038F14Rik	592.296	0.00608724	0.195409	0.0311513	0.975149	0.999996	713.988	535.305	532.014	557.017	634.148	581.303
1110046J04Rik	203.008	0.0691227	0.240351	0.287591	0.77366	0.999996	215.393	225.32	182.806	180.754	222.617	191.159
1110049F12Rik	760.668	-0.11067	0.173711	-0.63709	0.524066	0.999996	643.187	770.183	780.443	844.747	727.275	798.174
1110051M20Rik	699.158	0.058208	0.201471	0.288915	0.772646	0.999996	809.718	658.889	671.462	580.379	643.904	830.593
1110054M08Rik	216.392	0.119899	0.22847	0.524793	0.599727	0.999996	208.413	252.631	214.446	202.887	203.105	216.871
1110054O05Rik	998.874	0.019792	0.159924	0.123759	0.901506	0.999996	1067.99	901.278	1048.79	986.153	956.1	1032.93
1110057K04Rik	1194.46	-0.0571507	0.212281	-0.269222	0.787759	0.999996	1361.16	1088.36	1064.03	892.702	1423.51	1337
1110058L19Rik	430.014	-0.109616	0.239171	-0.458315	0.646726	0.999996	458.707	396.699	385.534	361.508	384.037	593.6
1110059E24Rik	747.092	-0.152128	0.192168	-0.791641	0.42857	0.999996	644.185	650.013	830.832	676.29	867.408	813.825
1110059G10Rik	465.16	-0.25716	0.190993	-1.34643	0.178163	0.999996	434.775	458.833	377.331	497.995	556.986	465.043
1110065P20Rik	495.17	-0.0108096	0.240319	-0.0449804	0.964123	0.999996	655.154	452.688	371.472	539.802	439.913	511.994
1110067D22Rik	969.824	0.0248504	0.280581	0.0885677	0.929425	0.999996	648.173	1166.88	1119.1	1216.09	1057.21	611.487
1190002F15Rik	8.55515	0.449899	0.956494	0.470363	0.638096	0.999996	11.9663	6.14508	11.7184	3.68885	8.8692	8.94313
1190002H23Rik	2708.36	-0.253306	0.221679	-1.14267	0.253174	0.999996	2560.78	2254.56	2600.3	2215.77	4062.1	2556.62
1190002N15Rik	2304.51	-0.153627	0.145861	-1.05325	0.292229	0.999996	2241.68	2168.53	2135.09	2347.34	2249.23	2685.17
1190005F20Rik	735.132	-0.216087	0.171776	-1.25796	0.208408	0.999996	692.05	731.947	615.214	774.659	736.144	860.776
1190005I06Rik	8.38914	0.686825	1.05328	0.652081	0.514349	0.999996	5.98314	15.7041	9.37469	1.22962	7.98228	10.061
1190007F08Rik	1176.04	-0.0442716	0.194061	-0.228132	0.819544	0.999996	1155.74	1244.04	1072.23	1401.76	921.51	1260.98
1190007I07Rik	88.3786	-0.170251	0.34241	-0.497214	0.619038	0.999996	87.7527	93.5418	67.9665	98.3694	109.978	72.6629
1200009I06Rik	2101.26	-0.24108	0.141525	-1.70344	0.0884853	0.999996	1892.67	2063.38	1821.03	2341.19	2301.56	2187.71
1200011I18Rik	698.749	-0.0308534	0.190448	-0.162005	0.871302	0.999996	653.159	600.169	821.457	737.77	642.13	737.808
1200011M11Rik	519.129	-0.0504211	0.203019	-0.248357	0.803858	0.999996	585.35	435.618	509.749	499.225	478.937	605.897
1200014J11Rik	512.95	0.0622761	0.192974	0.322718	0.746909	0.999996	500.589	460.198	612.87	477.092	529.491	497.462
1200016B10Rik	281.683	-0.31974	0.241131	-1.326	0.184839	0.999996	291.179	260.142	200.384	264.368	356.542	317.481
1300001I01Rik	693.911	0.299112	0.317672	0.941575	0.34641	0.999996	408.848	809.785	1078.09	822.614	588.028	456.1
1300002E11Rik	274.829	0.0968102	0.22523	0.429828	0.667321	0.999996	292.177	258.776	301.162	269.286	223.504	304.066
1300010F03Rik	403.556	0.576153	0.314988	1.82913	0.0673801	0.999996	264.255	465.66	719.507	357.819	277.606	336.485
1300014I06Rik	3100.88	-0.278495	0.164366	-1.69436	0.0901974	0.999996	2829.03	2735.93	2844.05	2786.31	3843.91	3566.07
1300017J02Rik	4.64005	0.854499	1.40415	0.608554	0.54282	0.999996	10.9691	3.41393	3.51551	1.22962	0.88692	7.82524
1300018I17Rik	289.014	-0.146157	0.236237	-0.618689	0.536121	0.999996	241.32	292.915	288.272	296.338	247.451	367.786
1300018J18Rik	817.223	-0.110307	0.164493	-0.670586	0.502484	0.999996	813.707	839.828	703.102	881.636	822.175	842.89
1500001M20Rik	204.871	0.38287	0.232452	1.64709	0.0995388	0.999996	247.303	234.196	214.446	163.539	194.236	175.509
1500002O20Rik	262.185	0.0447891	0.221995	0.201758	0.840106	0.999996	265.252	268.335	264.835	298.797	254.546	221.342
1500003O03Rik	3578.34	-0.0255194	0.147655	-0.172831	0.862784	0.999996	3623.79	3579.17	3435.82	4087.25	3323.29	3420.75
1500004A13Rik	28.2638	0.0575634	0.605665	0.0950417	0.924282	0.999996	27.9213	26.6287	31.6396	45.4958	13.3038	24.5936
1500009L16Rik	4318.91	-0.132214	0.148179	-0.892261	0.372253	0.999996	4481.37	3845.45	4038.15	4249.56	5008.44	4290.47
1500010J02Rik	503.547	0.333817	0.215367	1.55	0.121142	0.999996	521.53	456.784	707.789	452.499	456.764	425.917
1500011B03Rik	186.247	-0.270467	0.274938	-0.983738	0.325244	0.999996	185.477	180.256	140.62	212.724	243.016	155.387
1500011H22Rik	526.963	-0.0153136	0.188799	-0.0811104	0.935354	0.999996	505.575	518.918	548.419	459.877	519.735	609.251
1500011K16Rik	326.727	0.0767518	0.233938	0.328086	0.742847	0.999996	391.896	334.565	280.069	256.99	354.768	342.075
1500012F01Rik	46.0663	-0.80245	0.607821	-1.32021	0.186766	0.999996	15.955	64.1819	19.9212	51.6439	87.8051	36.8904
1500015A07Rik	32.2072	-0.156967	0.594969	-0.263825	0.791915	0.999996	20.941	45.7467	24.6086	22.1331	54.1021	25.7115
1500017E21Rik	128.789	0.299303	0.359843	0.831761	0.405544	0.999996	153.567	98.3213	175.775	94.6805	163.193	87.1955
1500031L02Rik	283.638	-0.095388	0.236758	-0.402893	0.687027	0.999996	320.098	262.873	239.055	347.982	250.112	281.709
1500032L24Rik	1323.15	-0.025705	0.170614	-0.150662	0.880242	0.999996	1531.68	1254.28	1148.4	1259.13	1412.86	1332.53
1520402A15Rik	53.0274	0.0720729	0.394777	0.182566	0.855139	0.999996	46.8679	58.7196	57.42	54.1032	54.1021	46.9514
1600002H07Rik	87.072	0.114475	0.395842	0.289195	0.772432	0.999996	101.713	57.3541	113.668	66.3993	111.752	71.545
1600002K03Rik	143.995	-0.0835964	0.316291	-0.264302	0.791547	0.999996	190.463	129.047	99.6061	169.687	141.02	134.147
1600012F09Rik	880.823	-0.314851	0.158739	-1.98346	0.0473165	0.999996	855.589	753.114	746.459	997.22	945.457	987.098
1600012H06Rik	2095.46	-0.255643	0.163652	-1.56212	0.11826	0.999996	2154.93	1764.32	1812.83	2197.33	2564.09	2079.28
1600014C10Rik	1580	-0.00140788	0.152707	-0.00921947	0.992644	0.999996	1676.28	1504.18	1558.54	1479.23	1743.69	1518.1
1600015I10Rik	59.7755	-0.634253	0.71886	-0.882304	0.377612	0.999996	5.98314	80.5688	53.9045	46.7255	135.699	35.7725
1600020E01Rik	141.57	-0.379099	0.297707	-1.2734	0.202876	0.999996	106.699	124.95	138.277	120.503	196.896	162.094
1600021P15Rik	143.197	0.231912	0.324682	0.714274	0.475058	0.999996	139.607	191.863	131.246	179.524	98.4482	118.496
1600027N09Rik	78.7187	0.0414626	0.343813	0.120596	0.904011	0.999996	65.8145	89.445	84.3722	68.8586	87.8051	76.0166
1700001G11Rik	25.038	-0.145887	0.614605	-0.237367	0.812372	0.999996	21.9382	23.8975	25.7804	12.2962	37.2507	29.0652
1700001G17Rik	3.07649	-2.33636	1.74355	-1.34	0.180245	0.999996	1.99438	0	1.17184	3.68885	2.66076	8.94313
1700001L05Rik	11.758	0.890306	1.1078	0.803673	0.421586	0.999996	19.9438	21.1664	4.68734	0	7.98228	16.7684
1700001L19Rik	4.6054	1.08049	1.66055	0.65068	0.515253	0.999996	6.98033	8.19344	3.51551	0	0	8.94313
1700001O22Rik	3.41552	2.04004	1.6194	1.25975	0.207761	0.999996	4.98595	3.41393	8.20285	1.22962	2.66076	0
1700003E16Rik	46.9075	0.742106	0.483716	1.53418	0.124986	0.999996	75.7864	32.7738	67.9665	30.7404	32.8161	41.362
1700003F17Rik	21.4219	0.611421	0.601087	1.01719	0.309062	0.999996	24.9297	29.3598	23.4367	14.7554	20.3992	15.6505
1700007B14Rik	4.84443	-0.198637	1.87094	-0.10617	0.915448	0.999996	12.9635	0.682787	0	1.22962	14.1907	0
1700007G11Rik	3.21933	0.341932	2.15366	0.158768	0.873852	0.999996	7.97752	2.73115	0	8.60732	0	0
1700007J10Rik	386.732	0.3549	0.295559	1.20078	0.229838	0.999996	257.275	497.069	547.247	426.677	284.701	307.42
1700007L15Rik	37.4509	-0.599717	0.546813	-1.09675	0.272751	0.999996	40.8848	29.3598	18.7494	44.2662	26.6076	64.8377
1700008J07Rik	105.173	-0.18888	0.365526	-0.516733	0.605342	0.999996	122.654	103.101	69.1383	110.666	147.229	78.2524
1700008O03Rik	4.32425	0.165639	1.33379	0.124187	0.901167	0.999996	1.99438	4.77951	7.03102	1.22962	5.32152	5.58946
1700009P17Rik	26.4754	0.663911	0.605834	1.09586	0.273139	0.999996	42.8792	30.7254	23.4367	31.9701	14.1907	15.6505
1700010I14Rik	4.64448	0.233148	1.44852	0.160955	0.872129	0.999996	0	10.2418	4.68734	4.91847	3.54768	4.47157
1700011J10Rik	283.025	0.416531	0.226752	1.83694	0.0662185	0.999996	315.112	385.092	269.522	238.546	239.469	250.408
1700012B15Rik	343.632	0.0218347	0.199363	0.109522	0.912788	0.999996	333.061	376.215	329.286	316.012	370.733	336.485
1700012D01Rik	21.3899	0.105314	0.690302	0.152562	0.878744	0.999996	27.9213	24.5803	14.062	20.9035	31.9291	8.94313
1700012D14Rik	11.3169	-0.664735	0.909836	-0.730609	0.465018	0.999996	10.9691	11.6074	3.51551	6.14809	13.3038	22.3578
1700013G23Rik	4.34818	0.0584348	1.38804	0.0420988	0.96642	0.999996	5.98314	6.14508	1.17184	3.68885	7.98228	1.11789
1700015E13Rik	12.8688	-1.03797	0.767502	-1.3524	0.176248	0.999996	6.98033	8.87623	9.37469	19.6739	13.3038	19.0042
1700017B05Rik	1398.56	-0.182354	0.22314	-0.817217	0.413805	0.999996	1618.44	1249.5	1061.68	1683.35	1101.56	1676.84
1700017G19Rik	34.4481	0.035676	0.568658	0.0627372	0.949976	0.999996	43.8764	30.7254	30.4677	15.985	53.2152	32.4188
1700018L02Rik	616.071	0.0235468	0.23491	0.100237	0.920156	0.999996	598.314	554.423	712.476	528.736	815.08	487.401
1700019E19Rik	1366.2	0.0863809	0.175421	0.492421	0.622421	0.999996	1582.54	1335.53	1304.25	1120.18	1469.63	1385.07
1700019G17Rik	23.5744	0.250667	0.653789	0.383406	0.701419	0.999996	29.9157	30.0426	16.4057	33.1997	10.643	21.2399
1700019G24Rik	5.7658	0.543155	1.18927	0.456712	0.647878	0.999996	3.98876	6.14508	10.5465	1.22962	7.09536	5.58946
1700019L03Rik	13.3457	-0.00931514	0.959585	-0.00970747	0.992255	0.999996	8.97471	24.5803	5.85918	27.0516	3.54768	10.061
1700019N12Rik	4.2931	0.403774	1.87276	0.215603	0.829297	0.999996	1.99438	0	12.8902	0	9.75612	1.11789
1700020I14Rik	669.656	-0.0427227	0.172594	-0.247533	0.804496	0.999996	697.036	628.846	653.884	613.579	676.72	747.869
1700020L24Rik	6.47385	0.674981	1.07531	0.62771	0.530194	0.999996	3.98876	8.19344	11.7184	4.91847	4.4346	5.58946
1700020O03Rik	435.522	-0.00592731	0.30397	-0.0194997	0.984442	0.999996	337.05	542.133	423.033	630.794	268.737	411.384
1700021C14Rik	21.2887	0.151846	0.643735	0.235882	0.813524	0.999996	25.9269	23.8975	17.5775	14.7554	31.0422	14.5326
1700021F05Rik	337.31	-0.225844	0.252553	-0.894246	0.37119	0.999996	400.87	301.109	230.852	308.634	391.132	391.262
1700021K19Rik	382.246	0.223506	0.325134	0.687427	0.491814	0.999996	248.3	495.02	490.999	494.306	230.599	334.25
1700023F06Rik	3.27094	0.797107	1.83315	0.434829	0.663686	0.999996	0	5.46229	7.03102	0	2.66076	4.47157
1700023L04Rik	13.8782	0.44486	0.8447	0.526648	0.598438	0.999996	15.955	13.6557	18.7494	7.3777	23.0599	4.47157
1700025G04Rik	1045.6	0.145019	0.184338	0.786699	0.431458	0.999996	951.319	1276.13	1066.37	860.732	1049.23	1069.82
1700025K23Rik	96.3938	0.29025	0.334895	0.866687	0.386113	0.999996	133.623	85.3483	99.6061	92.2213	94.9005	72.6629
1700028J19Rik	11.1276	-0.0250392	1.11429	-0.022471	0.982072	0.999996	22.9354	8.87623	1.17184	20.9035	10.643	2.23578
1700028K03Rik	37.0671	-0.130399	0.508494	-0.256442	0.797609	0.999996	42.8792	31.4082	31.6396	56.5624	27.4945	32.4188
1700029F09Rik	177.144	-0.035492	0.282365	-0.125695	0.899973	0.999996	220.379	138.606	166.401	201.657	187.14	148.68
1700029G01Rik	175.299	-0.201961	0.264578	-0.763335	0.445264	0.999996	162.542	129.729	198.04	180.754	190.688	190.042
1700029I01Rik	12.7469	-1.44948	0.870583	-1.66495	0.0959232	0.999996	7.97752	8.87623	3.51551	7.3777	27.4945	21.2399
1700029I15Rik	6.01493	0.286179	1.10424	0.259163	0.795509	0.999996	7.97752	8.19344	3.51551	6.14809	3.54768	6.70735
1700029J03Rik	20.8724	0.750265	0.689301	1.08844	0.2764	0.999996	34.9016	15.7041	28.1241	8.60732	13.3038	24.5936
1700029J07Rik	41.049	0.0107886	0.545052	0.0197937	0.984208	0.999996	34.9016	38.9188	50.3889	18.4443	65.6321	38.0083
1700030C10Rik	97.2023	-0.00937404	0.366651	-0.0255666	0.979603	0.999996	106.699	116.074	66.7946	120.503	69.1798	103.964
1700030J22Rik	6.45084	-0.731535	1.16118	-0.629993	0.528699	0.999996	0.99719	5.46229	8.20285	4.91847	12.4169	6.70735
1700030K09Rik	225.548	-0.000595442	0.261833	-0.00227413	0.998186	0.999996	223.371	219.857	234.367	169.687	289.136	216.871
1700030L20Rik	5.85549	-0.824183	1.22961	-0.670281	0.502679	0.999996	3.98876	6.14508	2.34367	15.985	4.4346	2.23578
1700034H14Rik	526.977	-0.138015	0.184548	-0.747856	0.454547	0.999996	563.412	480.682	461.703	537.343	597.784	520.937
1700034H15Rik	38.4493	-0.0415988	0.468724	-0.088749	0.929281	0.999996	37.8932	40.2844	35.1551	44.2662	28.3815	44.7157
1700034I23Rik	5.02292	0.115995	1.47946	0.0784041	0.937507	0.999996	3.98876	3.41393	8.20285	12.2962	0	2.23578
1700034P13Rik	98.8692	0.218224	0.320217	0.681489	0.495562	0.999996	105.702	88.7623	125.386	77.4659	101.996	93.9029
1700037C18Rik	120.253	0.316581	0.372873	0.849032	0.395863	0.999996	139.607	170.014	90.2314	66.3993	114.413	140.854
1700037H04Rik	1426.58	0.0529676	0.176261	0.300506	0.763791	0.999996	1535.67	1625.71	1195.27	1332.91	1333.93	1535.98
1700040I03Rik	267.488	-0.193438	0.224792	-0.860518	0.389503	0.999996	296.165	228.734	223.821	302.486	277.606	276.119
1700048O20Rik	48.0161	-0.36192	0.46994	-0.77014	0.441217	0.999996	51.8539	47.1123	26.9522	54.1032	70.0667	38.0083
1700049G17Rik	140.128	0.432203	0.291599	1.48218	0.138293	0.999996	160.548	139.971	182.806	138.947	126.83	91.6671
1700052K11Rik	193.19	-0.0816031	0.27189	-0.300133	0.764076	0.999996	221.376	137.923	205.071	177.065	207.539	210.164
1700052N19Rik	865.148	0.2237	0.168071	1.33099	0.183194	0.999996	939.353	826.172	1032.39	773.429	838.14	781.406
1700054N08Rik	36.4103	0.66077	0.508214	1.30018	0.19354	0.999996	41.882	57.3541	33.9832	34.4293	19.5122	31.301
1700055N04Rik	7.7661	-0.505096	0.956232	-0.528215	0.59735	0.999996	6.98033	7.51065	4.68734	9.83694	9.75612	7.82524
1700056E22Rik	17.2028	-0.378611	0.724098	-0.522872	0.601063	0.999996	9.9719	23.8975	10.5465	20.9035	13.3038	24.5936
1700063D05Rik	4.50989	0.0658663	1.2665	0.0520065	0.958524	0.999996	5.98314	2.04836	5.85918	4.91847	2.66076	5.58946
1700065D16Rik	5.90726	-0.733836	1.23803	-0.592742	0.553354	0.999996	3.98876	6.82787	2.34367	12.2962	8.8692	1.11789
1700066J24Rik	8.25839	-0.48635	1.13608	-0.428096	0.668581	0.999996	4.98595	9.55901	5.85918	23.3627	3.54768	2.23578
1700066M21Rik	329.845	0.10608	0.21343	0.497026	0.61917	0.999996	340.042	290.867	396.081	304.945	309.535	337.603
1700067K01Rik	6.59368	-0.0724255	1.3171	-0.0549888	0.956147	0.999996	0	10.9246	8.20285	11.0666	2.66076	6.70735
1700081L11Rik	1754.87	0.352985	0.204351	1.72735	0.0841055	0.999996	1542.65	2159.65	2201.88	1866.56	1289.58	1468.91
1700084E18Rik	5.00263	-3.15629	1.57749	-2.00084	0.0454102	0.999996	0	2.73115	0	3.68885	12.4169	11.1789
1700086O06Rik	37.0734	-0.350331	0.489265	-0.716037	0.473969	0.999996	31.9101	35.5049	30.4677	27.0516	50.5545	46.9514
1700088E04Rik	81.2012	-0.262899	0.347825	-0.755839	0.449746	0.999996	61.8258	84.6655	74.9975	82.3844	107.317	76.0166
1700092M07Rik	3.05319	-1.11774	1.56828	-0.712718	0.47602	0.999996	3.98876	0.682787	1.17184	4.91847	5.32152	2.23578
1700094D03Rik	14.981	-0.206261	0.826802	-0.249469	0.802998	0.999996	7.97752	25.2631	8.20285	18.4443	22.173	7.82524
1700094J05Rik	9.04331	0.108719	1.11017	0.0979297	0.921988	0.999996	3.98876	12.2902	11.7184	8.60732	0.88692	16.7684
1700096K18Rik	75.3803	0.247851	0.405095	0.611833	0.540648	0.999996	47.8651	103.784	93.7469	56.5624	70.9536	79.3703
1700101I11Rik	26.1785	0.115355	0.564118	0.204487	0.837973	0.999996	25.9269	25.2631	30.4677	22.1331	18.6253	34.6546
1700102P08Rik	3.03132	1.2609	1.7651	0.714352	0.475009	0.999996	1.99438	9.55901	1.17184	3.68885	1.77384	0
1700106N22Rik	152.153	-0.0532743	0.283601	-0.18785	0.850994	0.999996	122.654	133.826	192.181	154.932	147.229	162.094
1700108F19Rik	3.09289	-0.680119	2.00247	-0.33964	0.734128	0.999996	5.98314	0	1.17184	2.45923	0	8.94313
1700109H08Rik	29.7662	-0.402064	0.578002	-0.69561	0.486673	0.999996	40.8848	19.8008	16.4057	25.822	39.9114	35.7725
1700112E06Rik	22.0329	-0.715858	0.602492	-1.18816	0.23477	0.999996	15.955	17.7525	16.4057	23.3627	36.3637	22.3578
1700113A16Rik	78.3893	-0.243857	0.381584	-0.639066	0.52278	0.999996	65.8145	96.9557	51.5608	103.288	78.9359	73.7808
1700113I22Rik	57.5967	-0.317986	0.411054	-0.773587	0.439175	0.999996	69.8033	40.9672	43.3579	61.4809	71.8406	58.1303
1700120C14Rik	14.0274	0.114157	0.757712	0.15066	0.880244	0.999996	17.9494	16.3869	9.37469	8.60732	15.0776	16.7684
1700123M08Rik	20.3439	-0.432791	0.818461	-0.528786	0.596954	0.999996	23.9326	25.2631	2.34367	19.6739	15.0776	35.7725
1700123O20Rik	1109.94	-0.0644594	0.157821	-0.408433	0.682956	0.999996	1205.6	1025.55	1024.18	1171.83	1090.03	1142.48
1810006K21Rik	1474.46	-0.0592326	0.192921	-0.30703	0.75882	0.999996	1794.94	1386.06	1150.74	1598.5	1403.99	1512.51
1810008A18Rik	1209.57	0.00531966	0.164908	0.0322583	0.974266	0.999996	1347.2	1051.49	1237.46	1261.59	1146.79	1212.91
1810009A15Rik	428.926	-0.0440889	0.187455	-0.235197	0.814056	0.999996	453.721	430.156	383.19	420.529	465.633	420.327
1810010H24Rik	158.444	0.186628	0.321145	0.581134	0.56115	0.999996	116.671	187.084	202.728	105.747	168.515	169.919
1810011O10Rik	21.2847	0.304374	0.672579	0.452547	0.650875	0.999996	20.941	25.9459	23.4367	17.2146	8.8692	31.301
1810012P15Rik	11.6241	0.990814	0.825811	1.19981	0.230214	0.999996	11.9663	22.532	11.7184	8.60732	7.09536	7.82524
1810013D10Rik	1291.34	0.184376	0.188917	0.975964	0.329082	0.999996	1717.16	1234.48	1169.49	1213.63	1160.09	1253.16
1810013L24Rik	1419.38	0.136215	0.169888	0.801797	0.42267	0.999996	1599.49	1454.34	1405.03	1513.66	1405.77	1138.01
1810014B01Rik	92.0526	0.529367	0.325291	1.62737	0.103659	0.999996	108.694	121.536	96.0905	61.4809	85.1444	79.3703
1810014F10Rik	161.882	0.326256	0.321514	1.01475	0.310226	0.999996	244.312	150.213	145.308	184.443	111.752	135.265
1810019D21Rik	12.4453	-0.0797979	0.822571	-0.0970104	0.922718	0.999996	8.97471	12.2902	15.2339	11.0666	20.3992	6.70735
1810020D17Rik	507.487	-0.138879	0.207513	-0.669255	0.503333	0.999996	584.353	478.633	385.534	549.639	513.527	533.234
1810021B22Rik	55.6178	-0.301317	0.445138	-0.676906	0.498466	0.999996	66.8117	43.0156	39.8424	40.5774	62.9713	80.4882
1810022K09Rik	788.303	-0.286554	0.184812	-1.55052	0.121016	0.999996	803.735	700.539	626.932	757.444	965.856	875.309
1810026B05Rik	401.57	-0.295985	0.279095	-1.06052	0.288908	0.999996	257.275	385.774	439.438	307.404	562.308	457.218
1810026J23Rik	1956.74	-0.0908617	0.161418	-0.562898	0.573505	0.999996	2069.17	1635.27	1982.75	1850.57	2058.54	2144.12
1810027O10Rik	1195.99	0.0486956	0.202425	0.240561	0.809895	0.999996	1523.71	1204.44	919.891	1132.48	1207.1	1188.32
1810029B16Rik	164.845	-0.255208	0.26001	-0.981532	0.32633	0.999996	157.556	125.633	168.744	163.539	188.027	185.57
1810030N24Rik	410.575	0.0564246	0.197014	0.286399	0.774572	0.999996	434.775	441.08	379.675	354.13	408.87	444.921
1810030O07Rik	1652.9	0.107193	0.177551	0.60373	0.546023	0.999996	1760.04	1690.58	1692.13	1377.17	1450.11	1947.37
1810031K17Rik	1682.33	0.101904	0.15074	0.676026	0.499024	0.999996	1617.44	1703.55	1904.23	1690.72	1520.18	1657.83
1810032O08Rik	26.5381	-0.011392	0.666907	-0.0170819	0.986371	0.999996	13.9607	29.3598	36.3269	11.0666	41.6853	26.8294
1810034E14Rik	95.9458	-0.0874415	0.329922	-0.265037	0.790981	0.999996	77.7808	96.9557	104.293	88.5325	85.1444	122.968
1810035L17Rik	463.694	0.00962792	0.195389	0.0492757	0.9607	0.999996	530.505	471.123	393.737	441.433	473.615	471.75
1810037I17Rik	1948.18	-0.147496	0.155561	-0.948153	0.343052	0.999996	2024.3	1899.51	1621.82	1983.37	2179.16	1980.9
1810041L15Rik	147.868	0.387364	0.453462	0.854236	0.392974	0.999996	114.677	198.691	188.666	238.546	85.1444	61.484
1810043G02Rik	360.059	-0.170847	0.216676	-0.788493	0.430408	0.999996	290.182	325.006	401.94	343.063	378.715	421.445
1810043H04Rik	298.607	0.0480659	0.250209	0.192103	0.847661	0.999996	373.946	264.921	271.866	266.827	251.885	362.197
1810044D09Rik	10.56	0.86873	0.973766	0.892134	0.372321	0.999996	6.98033	14.3385	19.9212	3.68885	15.0776	3.35367
1810046J19Rik	745.235	-0.135771	0.21852	-0.621322	0.534388	0.999996	905.448	667.083	557.794	703.341	746.787	890.959
1810048J11Rik	385.453	0.265095	0.195516	1.35588	0.175139	0.999996	372.949	418.548	471.078	359.048	346.786	344.311
1810049H13Rik	88.7157	0.478266	0.362125	1.32072	0.186594	0.999996	103.708	92.859	113.668	87.3028	87.8051	46.9514
1810053B23Rik	9.11517	0.147154	1.20029	0.122599	0.902425	0.999996	4.98595	0.682787	23.4367	4.91847	15.0776	5.58946
1810055G02Rik	1317.36	-0.0409393	0.162349	-0.252169	0.800911	0.999996	1438.94	1163.47	1294.88	1222.24	1373.84	1410.78
1810058I24Rik	1130.98	-0.246396	0.15966	-1.54325	0.12277	0.999996	1127.82	1061.05	914.032	1223.47	1192.91	1266.57
1810062G17Rik	43.4726	-0.614478	0.469453	-1.30892	0.190561	0.999996	36.896	44.3811	21.093	55.3328	46.1199	57.0125
1810062O18Rik	51.0719	0.893224	0.504862	1.76925	0.0768529	0.999996	83.7639	63.4992	51.5608	57.792	31.9291	17.8863
1810063B05Rik	458.745	-0.299067	0.195068	-1.53314	0.12524	0.999996	459.705	391.92	382.019	521.358	445.234	552.238
1810063B07Rik	477.242	-0.13601	0.228564	-0.595065	0.5518	0.999996	517.542	501.848	344.52	419.3	573.837	506.405
1810074P20Rik	799.205	-0.237832	0.177038	-1.3434	0.179144	0.999996	772.822	643.185	786.302	773.429	937.475	882.016
2010001E11Rik	9.84663	0.267035	0.93306	0.286193	0.77473	0.999996	3.98876	16.3869	11.7184	12.2962	7.98228	6.70735
2010001M06Rik	107.852	-0.293599	0.295868	-0.992331	0.321036	0.999996	102.711	86.7139	101.95	105.747	130.377	119.614
2010002M12Rik	30.2592	-0.0936022	0.549844	-0.170234	0.864826	0.999996	36.896	19.8008	31.6396	25.822	41.6853	25.7115
2010002N04Rik	1005.32	0.073536	0.191988	0.383023	0.701703	0.999996	885.505	1076.07	1131.99	986.153	1140.58	811.589
2010003O02Rik	186.899	0.175381	0.265342	0.66096	0.508638	0.999996	222.373	220.54	151.167	159.85	172.949	194.513
2010005H15Rik	5.15176	1.73073	1.29865	1.33272	0.182625	0.999996	12.9635	2.73115	8.20285	1.22962	3.54768	2.23578
2010011I20Rik	1961.64	-0.122712	0.147482	-0.832051	0.40538	0.999996	1711.18	1887.22	2036.65	2133.39	2032.82	1968.61
2010012O05Rik	413.208	0.0409831	0.197319	0.207699	0.835464	0.999996	410.842	439.032	406.627	467.255	400.001	355.489
2010015L04Rik	69.7673	0.114692	0.367792	0.31184	0.755162	0.999996	67.8089	71.6926	78.513	49.1847	75.3882	76.0166
2010106E10Rik	31.0622	0.125313	0.541917	0.23124	0.817129	0.999996	39.8876	22.532	35.1551	33.1997	35.4768	20.122
2010106G01Rik	2138.22	-0.170495	0.209264	-0.814737	0.415223	0.999996	2334.42	1428.39	2275.71	1993.21	2491.36	2306.21
2010107E04Rik	793.001	-0.101988	0.18692	-0.545627	0.585322	0.999996	918.412	706.684	670.29	767.281	864.747	830.593
2010107H07Rik	225.74	-0.0302591	0.260809	-0.11602	0.907637	0.999996	284.199	219.174	166.401	226.25	231.486	226.932
2010109K11Rik	988.429	0.0792927	0.225288	0.351961	0.724867	0.999996	1160.73	916.3	971.452	718.097	1262.97	901.02
2010111I01Rik	392.964	-0.0513012	0.219385	-0.233841	0.815108	0.999996	382.921	432.887	342.176	345.523	484.259	370.022
2010204K13Rik	19.6535	-0.0742334	0.656171	-0.113131	0.909927	0.999996	26.9241	19.8008	10.5465	22.1331	19.5122	19.0042
2010305A19Rik	150.653	0.0565801	0.273736	0.206696	0.836248	0.999996	166.531	138.606	155.854	132.799	131.264	178.863
2010315B03Rik	231.034	-0.138023	0.279081	-0.494563	0.620909	0.999996	199.438	210.981	250.773	168.458	313.97	242.582
2010320M18Rik	242.438	-0.13294	0.223931	-0.593665	0.552736	0.999996	232.345	232.147	229.68	255.76	285.588	219.107
2010321M09Rik	1102.75	-0.155574	0.15838	-0.98228	0.325962	0.999996	1066	944.294	1121.45	1137.4	1232.82	1114.54
2200002D01Rik	15.6614	0.114452	0.745634	0.153497	0.878007	0.999996	23.9326	17.7525	7.03102	14.7554	15.9646	14.5326
2210009G21Rik	115.551	0.453954	0.360508	1.25921	0.207956	0.999996	96.7274	174.111	128.902	135.258	78.9359	79.3703
2210012G02Rik	368.063	0.0365702	0.194783	0.187749	0.851073	0.999996	413.834	357.78	346.863	346.752	378.715	364.433
2210013O21Rik	964.465	0.0958448	0.172283	0.556321	0.577992	0.999996	1122.84	1005.74	860.128	988.612	933.04	876.427
2210015D19Rik	225.419	-0.0367892	0.252033	-0.14597	0.883945	0.999996	264.255	187.084	216.79	255.76	238.582	190.042
2210016F16Rik	1420.48	0.0171261	0.173433	0.0987479	0.921338	0.999996	1548.64	1439.31	1298.39	1244.37	1341.02	1651.13
2210016L21Rik	363.24	-0.2454	0.254363	-0.964763	0.334663	0.999996	332.064	431.521	232.024	362.737	388.471	432.624
2210018M11Rik	659.134	-0.273149	0.224358	-1.21747	0.223426	0.999996	417.823	695.077	677.321	770.97	718.406	675.206
2210020M01Rik	7.4734	-0.362424	1.0202	-0.355248	0.722404	0.999996	8.97471	4.77951	5.85918	7.3777	4.4346	13.4147
2210021J22Rik	275.699	-0.0427147	0.210901	-0.202535	0.839499	0.999996	263.258	302.474	248.429	275.434	287.362	277.237
2210039B01Rik	304.264	-0.431787	0.214815	-2.01004	0.0444267	0.999996	268.244	283.356	224.992	311.093	364.524	373.376
2210403K04Rik	511.32	-0.0704047	0.236286	-0.297964	0.765731	0.999996	559.423	473.171	465.219	402.085	691.798	476.222
2210404J11Rik	269.197	0.104584	0.246786	0.423785	0.671723	0.999996	235.337	251.265	351.551	244.694	295.344	236.993
2210404O07Rik	126.572	0.538383	0.301779	1.78403	0.0744187	0.999996	185.477	137.923	126.558	106.977	115.3	87.1955
2210404O09Rik	111.669	0.223354	0.299711	0.745232	0.456132	0.999996	119.663	136.557	104.293	109.436	111.752	88.3134
2210408F21Rik	70.9711	0.209089	0.415197	0.50359	0.61455	0.999996	107.696	70.327	50.3889	66.3993	80.7098	50.3051
2210408I21Rik	166.52	-0.299549	0.341393	-0.877431	0.380253	0.999996	115.674	136.557	196.868	145.095	265.189	139.736
2210411K11Rik	31.8689	0.318124	0.548784	0.579689	0.562125	0.999996	46.8679	32.091	26.9522	40.5774	25.7207	19.0042
2210416O15Rik	8.85337	-0.0276084	1.15335	-0.0239377	0.980902	0.999996	9.9719	13.6557	2.34367	20.9035	1.77384	4.47157
2210417K05Rik	14.3047	0.198635	1.03566	0.191797	0.847902	0.999996	27.9213	17.7525	0	17.2146	10.643	12.2968
2300009A05Rik	121.736	0.173683	0.299522	0.579868	0.562004	0.999996	143.595	137.923	105.465	94.6805	117.96	130.793
2310001A20Rik	2593.71	0.027269	0.144044	0.18931	0.84985	0.999996	2787.15	2557.04	2511.24	2351.03	2708.65	2647.17
2310001H17Rik	8.85299	0.46029	0.954333	0.482316	0.629582	0.999996	4.98595	12.9729	12.8902	4.91847	10.643	6.70735
2310001K24Rik	4.0384	1.93753	1.47064	1.31747	0.18768	0.999996	4.98595	6.14508	8.20285	0	2.66076	2.23578
2310003C23Rik	441.02	0.0536055	0.2355	0.227624	0.819939	0.999996	509.564	469.757	366.785	539.802	343.238	416.973
2310003F16Rik	874.093	-0.132866	0.182149	-0.729435	0.465736	0.999996	953.313	840.51	707.789	843.518	1003.99	895.431
2310003H01Rik	616.433	-0.0588297	0.205429	-0.286375	0.774591	0.999996	549.452	750.382	509.749	632.023	586.254	670.735
2310003L22Rik	207.761	-0.079558	0.25433	-0.312814	0.754422	0.999996	245.309	202.105	158.198	210.265	204.879	225.814
2310004I24Rik	352.862	-0.0449935	0.214962	-0.209309	0.834207	0.999996	348.019	404.892	288.272	334.456	384.923	356.607
2310004N24Rik	81.5557	-0.133461	0.420387	-0.317471	0.750886	0.999996	126.643	51.8918	55.0763	83.614	86.0313	86.0776
2310008H04Rik	548.872	0.0276967	0.179383	0.1544	0.877294	0.999996	563.412	544.181	555.45	475.862	564.081	590.247
2310008H09Rik	325.096	-0.469568	0.239833	-1.95789	0.0502427	0.999996	200.435	326.372	290.615	346.752	392.906	393.498
2310009A05Rik	357.975	-0.10651	0.217787	-0.489054	0.624803	0.999996	397.879	349.587	285.928	376.263	329.047	409.148
2310009B15Rik	110.15	0.320553	0.324718	0.987174	0.323557	0.999996	161.545	107.197	98.4342	87.3028	100.222	106.2
2310010J17Rik	48.7501	0.279261	0.450425	0.619994	0.535262	0.999996	63.8201	57.3541	38.6706	47.9551	31.0422	53.6588
2310010M20Rik	34.5046	-0.294354	0.500714	-0.587868	0.556621	0.999996	23.9326	39.6016	29.2959	35.6589	46.1199	32.4188
2310011J03Rik	1443.62	0.00488723	0.158172	0.0308982	0.975351	0.999996	1381.11	1594.99	1361.67	1320.61	1555.66	1447.67
2310014L17Rik	7.4155	0.0923035	1.08026	0.0854457	0.931907	0.999996	9.9719	6.14508	7.03102	4.91847	14.1907	2.23578
2310015A10Rik	149.983	0.427423	0.345613	1.23671	0.216195	0.999996	222.373	166.6	126.558	116.814	88.692	178.863
2310016M24Rik	1180.54	0.00392382	0.162969	0.0240771	0.980791	0.999996	1221.56	1296.61	1026.53	1225.93	1134.37	1178.26
2310021P13Rik	632.66	0.0950156	0.300799	0.315877	0.752096	0.999996	446.741	729.899	782.786	907.458	415.966	513.112
2310022A10Rik	325.774	-0.0401966	0.215997	-0.186098	0.852368	0.999996	293.174	339.345	330.458	391.018	307.761	292.888
2310022B05Rik	2364.56	0.326445	0.17571	1.85786	0.063189	0.999996	2176.87	3103.27	2610.85	2278.48	1935.26	2082.63
2310028H24Rik	170.265	0.256136	0.301895	0.848428	0.396199	0.999996	232.345	190.497	132.417	153.702	125.943	186.688
2310030N02Rik	83.3451	0.087164	0.349431	0.249446	0.803016	0.999996	108.694	69.6442	79.6848	81.1548	90.4659	70.4272
2310033P09Rik	196.698	0.255652	0.278446	0.918139	0.358546	0.999996	201.432	241.706	199.212	125.421	197.783	214.635
2310034G01Rik	16.8617	-0.395821	0.841061	-0.470621	0.637911	0.999996	24.9297	4.77951	14.062	24.5923	7.09536	25.7115
2310035C23Rik	346.925	-0.297294	0.233449	-1.27348	0.202846	0.999996	252.289	292.233	390.221	418.07	391.132	337.603
2310035K24Rik	618.955	-0.0150074	0.168729	-0.0889435	0.929127	0.999996	633.216	602.901	611.698	568.083	648.339	649.495
2310036O22Rik	1281.79	0.0252352	0.186662	0.135192	0.89246	0.999996	1581.54	1248.13	1048.79	1309.54	1258.54	1244.21
2310037I24Rik	1164.59	-0.0650666	0.153787	-0.423095	0.672226	0.999996	1184.66	1188.05	1041.76	1126.33	1220.4	1226.33
2310039H08Rik	297.318	-0.26909	0.241292	-1.11521	0.264762	0.999996	304.143	283.356	220.305	397.166	283.815	295.123
2310039L15Rik	34.2193	0.0201127	0.56862	0.0353711	0.971784	0.999996	34.9016	32.091	36.3269	52.8736	34.5899	14.5326
2310040G24Rik	15.8012	-1.24762	0.716382	-1.74156	0.081586	0.999996	8.97471	7.51065	11.7184	28.2812	15.9646	22.3578
2310042D19Rik	13.1826	-0.852364	1.29839	-0.656478	0.511517	0.999996	26.9241	1.36557	0	2.45923	20.3992	27.9473
2310043J07Rik	4.408	2.15177	1.46925	1.46454	0.143046	0.999996	9.9719	4.77951	7.03102	0	3.54768	1.11789
2310044G17Rik	358.343	-0.318634	0.258656	-1.23188	0.217992	0.999996	297.163	241.024	420.689	340.604	472.729	377.847
2310044H10Rik	4756.97	0.240031	0.160618	1.49443	0.135064	0.999996	5602.21	5597.48	4253.76	4568.03	4160.54	4359.78
2310045N01Rik	341.881	0.00240845	0.194089	0.012409	0.990099	0.999996	359.986	328.42	338.661	318.471	359.203	346.546
2310046A06Rik	24.7246	-0.777744	0.83636	-0.929915	0.352415	0.999996	2.99157	8.87623	43.3579	19.6739	39.9114	33.5367
2310046O06Rik	619.807	0.0620137	0.187393	0.330928	0.740699	0.999996	645.182	636.357	617.558	543.491	555.212	721.04
2310047B19Rik	478.258	0.124723	0.221791	0.562344	0.573881	0.999996	528.511	399.43	569.512	448.81	386.697	536.588
2310047M10Rik	360.836	0.178676	0.209701	0.85205	0.394186	0.999996	404.859	419.914	323.427	376.263	321.952	318.599
2310057M21Rik	233.732	-0.0892912	0.266767	-0.334716	0.737839	0.999996	236.334	189.132	255.46	175.835	282.928	262.704
2310061C15Rik	156.568	-0.0838806	0.299089	-0.280454	0.779129	0.999996	189.466	159.089	106.637	179.524	139.247	165.448
2310061I04Rik	112.789	0.00881038	0.294077	0.0299595	0.976099	0.999996	108.694	130.412	99.6061	122.962	109.978	105.082
2310061J03Rik	266.789	-0.0840415	0.219037	-0.383687	0.701211	0.999996	254.283	293.598	228.508	263.138	291.797	269.412
2310067B10Rik	595.895	0.248406	0.305319	0.813594	0.415878	0.999996	377.935	654.792	908.173	673.83	384.923	575.714
2310068J16Rik	9.49248	-0.375139	0.934507	-0.40143	0.688104	0.999996	9.9719	8.87623	5.85918	6.14809	7.09536	19.0042
2310079F23Rik	169.114	-0.0752859	0.256783	-0.293188	0.769378	0.999996	178.497	178.89	135.933	174.606	162.306	184.452
2400001E08Rik	1630.68	0.074205	0.160189	0.463234	0.643197	0.999996	1898.65	1584.75	1533.93	1629.24	1469.63	1667.89
2400003C14Rik	2675.61	-0.0107753	0.155982	-0.0690801	0.944926	0.999996	3063.37	2349.47	2585.07	2617.86	2706.88	2731.01
2400009B08Rik	9.15752	-0.00520284	0.94498	-0.00550577	0.995607	0.999996	8.97471	13.6557	4.68734	4.91847	11.53	11.1789
2410001C21Rik	1522.81	-0.0358689	0.159321	-0.225137	0.821873	0.999996	1573.57	1540.37	1398	1347.66	1654.11	1623.18
2410002F23Rik	906.644	0.0842452	0.153943	0.547248	0.584208	0.999996	908.44	949.073	942.156	826.303	911.754	902.138
2410002I01Rik	227.766	0.495117	0.285182	1.73614	0.0825385	0.999996	330.07	253.997	215.618	135.258	196.896	234.757
2410002O22Rik	1541.15	-0.0167442	0.169481	-0.0987974	0.921299	0.999996	1708.19	1295.93	1593.7	1666.13	1556.55	1426.43
2410003K15Rik	396.363	0.195443	0.228686	0.854636	0.392753	0.999996	515.547	419.231	333.973	421.759	355.655	332.014
2410004B18Rik	347.932	0.0728137	0.222016	0.327967	0.742937	0.999996	387.907	303.84	379.675	279.123	359.203	377.847
2410004N09Rik	26.7845	-0.311256	0.618779	-0.503017	0.614952	0.999996	32.9073	25.9459	12.8902	18.4443	42.5722	27.9473
2410004P03Rik	5.28469	0.449006	1.28216	0.350194	0.726193	0.999996	5.98314	8.87623	3.51551	2.45923	9.75612	1.11789
2410006H16Rik	152.852	-0.144726	0.260976	-0.554557	0.579198	0.999996	166.531	139.971	128.902	170.917	158.759	152.033
2410015M20Rik	731.559	-0.0462592	0.190838	-0.2424	0.80847	0.999996	855.589	708.05	595.293	723.015	719.292	788.113
2410016O06Rik	379.769	-0.191289	0.236578	-0.808565	0.418765	0.999996	438.764	345.49	278.897	399.626	348.56	467.279
2410017I17Rik	7.32881	0.774545	1.09071	0.710132	0.477623	0.999996	4.98595	12.2902	10.5465	1.22962	7.09536	7.82524
2410017P09Rik	222.315	-0.0095885	0.251706	-0.038094	0.969613	0.999996	251.292	223.954	189.837	200.428	270.511	197.867
2410018L13Rik	31.595	-0.0698519	0.506474	-0.137918	0.890305	0.999996	26.9241	38.236	26.9522	36.8885	29.2684	31.301
2410018M08Rik	1481.38	0.0985032	0.177645	0.554494	0.579241	0.999996	1811.89	1528.08	1255.04	1412.83	1388.03	1492.38
2410022L05Rik	124.805	-0.120677	0.302714	-0.398649	0.690152	0.999996	138.609	100.37	120.699	111.895	158.759	118.496
2410042D21Rik	409.228	-0.225973	0.241467	-0.935834	0.349358	0.999996	426.797	297.695	408.971	418.07	547.23	356.607
2410066E13Rik	310.905	-0.0785028	0.278767	-0.281607	0.778245	0.999996	214.396	408.306	283.584	356.589	347.673	254.879
2410075B13Rik	267.65	-0.00189032	0.287295	-0.00657974	0.99475	0.999996	225.365	269.701	308.193	168.458	307.761	326.424
2410076I21Rik	78.0674	-0.339548	0.406407	-0.835487	0.403443	0.999996	89.7471	71.0098	45.7016	65.1697	77.1621	119.614
2410089E03Rik	201.269	0.16899	0.308994	0.546904	0.584444	0.999996	129.635	281.308	227.336	206.576	173.836	188.924
2410091C18Rik	521.004	0.0320819	0.212912	0.150681	0.880227	0.999996	484.634	488.192	609.355	434.055	623.505	486.283
2410127L17Rik	626.686	0.0147869	0.202196	0.0731313	0.941702	0.999996	629.227	634.309	626.932	477.092	683.816	708.743
2410131K14Rik	315.49	-0.207396	0.233567	-0.887951	0.374567	0.999996	325.084	293.598	260.148	339.374	405.323	269.412
2500003M10Rik	3336.31	-0.0104056	0.135518	-0.0767836	0.938796	0.999996	3491.16	3082.1	3400.67	3316.28	3356.11	3371.56
2500004C02Rik	99.0916	0.659415	0.347226	1.89909	0.0575521	0.999996	137.612	137.24	89.0595	81.1548	91.3528	58.1303
2510002D24Rik	86.6142	-0.206348	0.391077	-0.527642	0.597748	0.999996	82.7668	77.1549	82.0285	51.6439	127.717	98.3744
2510003E04Rik	1227.46	-0.0957897	0.172313	-0.555905	0.578276	0.999996	1144.77	1083.58	1333.55	1100.51	1316.19	1386.19
2510006D16Rik	1344.26	-0.101545	0.18842	-0.538926	0.589938	0.999996	1498.78	1386.74	1004.26	1310.77	1387.14	1477.85
2510009E07Rik	1849.11	0.144737	0.207996	0.695864	0.486514	0.999996	1490.8	2006.71	2327.27	1955.09	1415.52	1899.3
2510012J08Rik	624.295	0.0648073	0.202561	0.319939	0.749014	0.999996	495.603	693.028	726.538	569.313	634.148	627.137
2510039O18Rik	2119.05	-0.074233	0.15137	-0.490408	0.623846	0.999996	2143.96	2155.56	1892.52	2215.77	1968.96	2337.51
2600006L11Rik	4.44873	0.751656	1.66185	0.452301	0.651052	0.999996	6.98033	4.09672	5.85918	0	9.75612	0
2610001J05Rik	2280.3	-0.189075	0.148263	-1.27526	0.202217	0.999996	2318.47	2091.38	1983.92	2258.81	2593.36	2435.89
2610002D18Rik	6.00396	-2.34093	1.57456	-1.48672	0.137088	0.999996	5.98314	0	0	20.9035	3.54768	5.58946
2610002I17Rik	179.55	-0.10528	0.333299	-0.315871	0.7521	0.999996	223.371	187.084	107.809	234.857	188.914	135.265
2610002J02Rik	1271.79	0.108626	0.162473	0.668578	0.503765	0.999996	1295.35	1375.13	1287.85	1122.64	1146.79	1402.95
2610002M06Rik	581.504	0.343519	0.260125	1.32059	0.186637	0.999996	685.069	606.997	659.744	602.513	626.166	308.538
2610005L07Rik	724.364	0.0930239	0.211117	0.440627	0.659483	0.999996	629.227	770.183	844.894	547.18	812.419	742.28
2610008E11Rik	938.651	-0.212868	0.174064	-1.22293	0.221355	0.999996	726.951	911.52	970.28	1013.2	1021.73	988.216
2610015P09Rik	73.0277	-0.713369	0.38129	-1.87094	0.0613536	0.999996	59.8314	55.9885	50.3889	60.2513	109.978	101.728
2610019F03Rik	93.9179	0.109716	0.352224	0.311495	0.755424	0.999996	89.7471	83.9828	119.527	62.7105	100.222	107.318
2610020C07Rik	250.426	-0.0534817	0.227825	-0.234749	0.814403	0.999996	225.365	251.265	260.148	296.338	223.504	245.936
2610020H08Rik	92.6018	-0.440294	0.427385	-1.03021	0.302913	0.999996	50.8567	118.805	65.6228	66.3993	141.02	112.907
2610021K21Rik	23.1733	0.520663	0.662531	0.785871	0.431943	0.999996	40.8848	14.3385	26.9522	12.2962	17.7384	26.8294
2610027L16Rik	768.013	-0.144302	0.174991	-0.824622	0.409586	0.999996	778.805	749.7	659.744	745.148	768.073	906.61
2610029G23Rik	752.956	-0.102202	0.174908	-0.584318	0.559006	0.999996	746.895	645.916	787.474	710.719	780.49	846.244
2610029I01Rik	146.618	-0.186176	0.306716	-0.607	0.543851	0.999996	115.674	137.24	158.198	179.524	109.091	179.981
2610034B18Rik	1088.24	0.0839092	0.164871	0.508937	0.610796	0.999996	1056.02	1058.32	1246.83	955.413	1118.41	1094.42
2610035D17Rik	339.373	0.242446	0.286468	0.846326	0.397371	0.999996	245.309	385.774	473.422	241.005	391.132	299.595
2610039C10Rik	323.677	-0.0126543	0.274371	-0.0461213	0.963214	0.999996	262.261	308.62	397.252	286.501	438.139	249.29
2610044O15Rik	238.155	-0.196858	0.235703	-0.835197	0.403607	0.999996	211.404	218.492	236.711	241.005	303.327	217.989
2610101N10Rik	745.338	-0.0145003	0.190427	-0.0761462	0.939303	0.999996	729.943	733.313	762.865	675.06	913.528	657.32
2610109H07Rik	3.05998	-1.01376	2.03049	-0.499272	0.617588	0.999996	0	4.77951	1.17184	1.22962	0	11.1789
2610203C20Rik	147.266	0.386453	0.359303	1.07556	0.282123	0.999996	147.584	210.298	142.964	115.584	188.914	78.2524
2610203C22Rik	4.36789	0.3243	1.31666	0.246305	0.805446	0.999996	2.99157	6.82787	4.68734	6.14809	4.4346	1.11789
2610204G22Rik	16.2569	0.586554	0.778831	0.75312	0.451378	0.999996	22.9354	20.4836	15.2339	3.68885	15.0776	20.122
2610206C17Rik	6.53484	-0.117951	1.19562	-0.0986523	0.921414	0.999996	6.98033	2.73115	9.37469	1.22962	13.3038	5.58946
2610301B20Rik	521.169	-0.154984	0.208307	-0.744018	0.456865	0.999996	507.57	398.747	575.371	496.765	611.975	536.588
2610301G19Rik	1087.21	0.186924	0.159343	1.17309	0.240761	0.999996	1068.99	1107.48	1297.22	992.301	1028.83	1028.46
2610305D13Rik	19.1401	0.739426	0.82474	0.896557	0.369955	0.999996	24.9297	40.9672	5.85918	6.14809	21.2861	15.6505
2610306M01Rik	87.1485	0.215382	0.435771	0.494255	0.621126	0.999996	92.7387	92.859	96.0905	35.6589	125.056	80.4882
2610307P16Rik	108.543	0.0534875	0.385926	0.138595	0.88977	0.999996	82.7668	139.971	108.981	59.0216	128.603	131.911
2610507B11Rik	1581.6	0.397825	0.231121	1.72128	0.0851999	0.999996	1324.27	1823.72	2246.41	1733.76	1183.15	1178.26
2610507I01Rik	222.141	0.0559359	0.27543	0.203086	0.839068	0.999996	160.548	238.975	280.069	237.316	231.486	184.452
2610524H06Rik	418.207	-0.0636611	0.195772	-0.32518	0.745045	0.999996	424.803	450.639	350.379	446.351	430.156	406.912
2610528E23Rik	170.591	-0.160829	0.260881	-0.616484	0.537575	0.999996	179.494	149.53	154.682	148.784	185.366	205.692
2700007P21Rik	922.605	0.200304	0.159342	1.25707	0.208728	0.999996	994.198	962.046	1003.09	946.805	825.723	803.764
2700023E23Rik	17.8705	-0.941075	0.75594	-1.24491	0.213166	0.999996	10.9691	20.4836	4.68734	25.822	15.0776	30.1831
2700029M09Rik	534.951	-0.193017	0.203502	-0.948478	0.342886	0.999996	596.32	501.165	399.596	580.379	584.481	547.767
2700038G22Rik	9.56068	0.407654	0.892552	0.456729	0.647866	0.999996	13.9607	11.6074	7.03102	7.3777	6.20844	11.1789
2700046G09Rik	59.5645	0.278167	0.441165	0.630527	0.52835	0.999996	75.7864	79.886	39.8424	39.3478	53.2152	69.3093
2700049A03Rik	336.196	0.118066	0.273633	0.431474	0.666123	0.999996	272.233	427.424	350.379	222.561	394.68	349.9
2700050L05Rik	188.452	0.170652	0.320741	0.532055	0.594688	0.999996	171.517	136.557	291.787	161.08	164.08	205.692
2700054A10Rik	12.4353	0.87568	0.782735	1.11874	0.26325	0.999996	12.9635	21.1664	14.062	8.60732	8.8692	8.94313
2700060E02Rik	3410.24	-0.113719	0.14353	-0.7923	0.428186	0.999996	3528.06	3295.13	3003.42	3793.37	3412.87	3428.57
2700062C07Rik	389.132	0.0448608	0.210378	0.213239	0.831141	0.999996	436.769	391.92	356.238	447.581	372.507	329.778
2700069I18Rik	49.0058	0.665579	0.428748	1.55238	0.120572	0.999996	75.7864	53.2574	51.5608	34.4293	44.346	34.6546
2700070H01Rik	3.06728	-0.410701	1.71702	-0.239194	0.810955	0.999996	0	5.46229	2.34367	1.22962	2.66076	6.70735
2700078E11Rik	432.999	0.0837985	0.260956	0.321122	0.748118	0.999996	442.752	400.113	493.343	595.135	329.047	337.603
2700081L22Rik	3.30581	1.92163	1.74596	1.10061	0.271065	0.999996	0	7.51065	8.20285	1.22962	1.77384	1.11789
2700081O15Rik	472.094	0.297312	0.701994	0.423525	0.671912	0.999996	306.137	780.425	474.594	804.17	219.069	248.172
2700086A05Rik	13.8407	-0.188517	0.833481	-0.226181	0.821061	0.999996	15.955	19.118	3.51551	11.0666	17.7384	15.6505
2700089E24Rik	2043.99	-0.0428756	0.141591	-0.302812	0.762033	0.999996	1999.37	2115.96	1925.33	1998.13	2204	2021.15
2700094K13Rik	335.808	0.0559393	0.250577	0.223242	0.823347	0.999996	394.887	348.904	282.412	295.108	268.737	424.799
2700097O09Rik	132.325	0.318424	0.322903	0.986129	0.32407	0.999996	202.43	105.149	133.589	114.354	123.282	115.143
2700099C18Rik	7.57294	-1.02655	1.07422	-0.955619	0.339265	0.999996	8.97471	4.77951	1.17184	7.3777	14.1907	8.94313
2810001G20Rik	110.223	-0.412036	0.313638	-1.31373	0.188937	0.999996	100.716	86.7139	96.0905	153.702	96.6743	127.44
2810002D19Rik	309.524	0.164329	0.214834	0.76491	0.444325	0.999996	363.974	293.598	324.599	298.797	320.178	255.997
2810002N01Rik	659.618	-0.0659905	0.183585	-0.359456	0.719254	0.999996	733.932	640.454	558.966	693.504	710.423	620.43
2810004N23Rik	394.76	0.13672	0.207349	0.65937	0.509659	0.999996	481.643	370.07	389.05	344.293	365.411	418.091
2810006K23Rik	228.308	-0.0341982	0.255521	-0.133837	0.893532	0.999996	239.326	234.879	201.556	250.842	173.836	269.412
2810008D09Rik	53.3422	-0.541599	0.412118	-1.31418	0.188785	0.999996	52.8511	33.4565	44.5298	61.4809	71.8406	55.8946
2810008M24Rik	1153.79	0.0108075	0.174138	0.0620627	0.950513	0.999996	1320.28	1028.28	1127.31	1034.11	1269.18	1143.6
2810013P06Rik	1151.56	-0.0448232	0.158017	-0.283661	0.776671	0.999996	1074.97	1095.87	1231.6	1109.11	1270.96	1126.83
2810021B07Rik	675.114	-0.130136	0.163373	-0.796559	0.425707	0.999996	620.252	661.62	651.541	745.148	667.851	704.272
2810021J22Rik	192.588	-0.0512114	0.304298	-0.168294	0.866352	0.999996	188.469	156.358	222.649	218.872	127.717	241.465
2810025M15Rik	129.306	-0.0785145	0.287853	-0.272759	0.785038	0.999996	139.607	115.391	123.043	108.206	154.324	135.265
2810029C07Rik	10.631	0.221388	0.868961	0.254773	0.798898	0.999996	6.98033	12.2902	15.2339	6.14809	14.1907	8.94313
2810030E01Rik	81.7742	0.363014	0.336995	1.07721	0.281387	0.999996	110.688	83.3	82.0285	70.0882	67.4059	77.1345
2810032G03Rik	32.2573	0.0745093	0.558013	0.133526	0.893777	0.999996	37.8932	35.5049	25.7804	40.5774	38.1376	15.6505
2810046L04Rik	329.154	0.26556	0.211543	1.25535	0.209352	0.999996	341.039	416.5	319.911	277.894	316.631	302.949
2810047C21Rik1	92.7921	0.58224	0.369016	1.57782	0.114608	0.999996	103.708	126.316	103.122	68.8586	49.6675	105.082
2810055F11Rik	640.214	0.00167855	0.192929	0.00870036	0.993058	0.999996	712.991	604.949	604.667	527.506	689.137	702.036
2810055G20Rik	81.3796	-0.261668	0.357656	-0.73162	0.464401	0.999996	64.8173	64.1819	93.7469	92.2213	102.883	70.4272
2810403A07Rik	679.874	-0.221438	0.166125	-1.33296	0.182545	0.999996	640.196	614.508	629.276	666.453	752.995	775.817
2810403D21Rik	25.582	0.0976224	0.618848	0.157748	0.874655	0.999996	36.896	27.3115	15.2339	15.985	34.5899	23.4757
2810405K02Rik	343.339	-0.0578803	0.206118	-0.280812	0.778855	0.999996	365.969	356.415	285.928	370.115	331.708	349.9
2810407C02Rik	990.912	0.0457764	0.21419	0.213719	0.830767	0.999996	1308.31	893.085	817.941	1077.14	858.539	990.452
2810408A11Rik	39.9624	0.0767699	0.528967	0.145132	0.884607	0.999996	35.8988	51.8918	35.1551	19.6739	39.0245	58.1303
2810408I11Rik	9.48274	0.58965	1.35382	0.435544	0.663168	0.999996	23.9326	8.87623	1.17184	18.4443	0	4.47157
2810408M09Rik	486.038	0.0519269	0.227795	0.227955	0.819681	0.999996	564.409	566.03	352.723	451.27	475.389	506.405
2810410L24Rik	34.1054	0.223817	0.62638	0.357318	0.720854	0.999996	15.955	65.5475	28.1241	44.2662	28.3815	22.3578
2810417H13Rik	62.5841	0.0129927	0.384145	0.0338223	0.973019	0.999996	68.8061	64.8647	55.0763	46.7255	71.8406	68.1914
2810422J05Rik	685.034	0.0575341	0.222648	0.258408	0.796092	0.999996	873.538	717.609	503.889	726.704	645.678	642.788
2810422O20Rik	142.742	0.285091	0.270707	1.05313	0.292279	0.999996	180.491	134.509	155.854	121.732	128.603	135.265
2810428I15Rik	1325.35	-0.004135	0.159611	-0.0259067	0.979332	0.999996	1437.95	1358.06	1173.01	1383.32	1233.71	1366.06
2810432D09Rik	418.492	0.120375	0.254908	0.472229	0.636763	0.999996	583.356	414.451	309.365	402.085	355.655	446.039
2810432L12Rik	568.434	-0.0938935	0.171633	-0.547058	0.584339	0.999996	534.494	546.912	568.34	574.231	551.664	634.962
2810433D01Rik	31.0984	0.0883104	0.57628	0.153242	0.878207	0.999996	49.8595	20.4836	25.7804	40.5774	23.0599	26.8294
2810442I21Rik	14.5767	-0.0435221	0.751524	-0.0579117	0.953819	0.999996	7.97752	19.8008	15.2339	13.5258	18.6253	12.2968
2810442N19Rik	5.1333	0.265449	1.45375	0.182596	0.855115	0.999996	0	7.51065	9.37469	1.22962	7.09536	5.58946
2810453I06Rik	477.05	0.0628332	0.278803	0.225368	0.821693	0.999996	500.589	606.997	352.723	644.32	352.994	404.677
2810454H06Rik	24.5657	0.282499	0.613263	0.460649	0.645051	0.999996	16.9522	36.8705	26.9522	24.5923	27.4945	14.5326
2810468N07Rik	5.15354	-0.218638	1.5855	-0.137898	0.890321	0.999996	10.9691	3.41393	0	1.22962	14.1907	1.11789
2810474O19Rik	1874.63	-0.320425	0.179918	-1.78095	0.0749205	0.999996	1826.85	1692.63	1482.37	1703.02	2142.8	2400.11
2900002K06Rik	54.0853	-0.445807	0.41267	-1.0803	0.280009	0.999996	57.837	46.4295	32.8114	62.7105	57.6498	67.0735
2900005J15Rik	74.3126	-0.243168	0.468199	-0.519368	0.603504	0.999996	61.8258	70.327	72.6538	55.3328	141.02	44.7157
2900006K08Rik	84.2686	0.459793	0.333823	1.37736	0.168402	0.999996	109.691	89.445	93.7469	61.4809	67.4059	83.8419
2900008C10Rik	34.1435	-0.249913	0.493868	-0.506031	0.612835	0.999996	33.9045	31.4082	28.1241	33.1997	30.1553	48.0693
2900010M23Rik	837.467	-0.272734	0.227856	-1.19696	0.231322	0.999996	1003.17	716.243	555.45	950.494	821.288	978.155
2900026A02Rik	44.3197	1.16617	0.624668	1.86687	0.06192	0.999996	26.9241	40.9672	116.012	43.0366	17.7384	21.2399
2900041M22Rik	8.01323	-1.56734	1.03796	-1.51002	0.131039	0.999996	5.98314	4.77951	1.17184	17.2146	8.8692	10.061
2900053A13Rik	220.267	-0.485758	0.254931	-1.90545	0.0567215	0.999996	235.337	161.82	153.511	254.531	249.225	267.176
2900056M20Rik	305.921	-0.0299228	0.249456	-0.119952	0.904521	0.999996	370.955	273.115	264.835	306.175	373.393	247.054
2900064A13Rik	3053.68	-0.0905875	0.149049	-0.607771	0.543339	0.999996	3207.96	2926.42	2739.75	2932.64	3458.99	3056.31
2900076A07Rik	41.2763	-0.320862	0.441355	-0.726994	0.46723	0.999996	37.8932	36.8705	35.1551	50.4143	38.1376	49.1872
2900092D14Rik	3.79141	-0.627738	1.3278	-0.472767	0.636379	0.999996	1.99438	3.41393	3.51551	4.91847	4.4346	4.47157
2900092E17Rik	566.44	-0.127518	0.188238	-0.677431	0.498133	0.999996	481.643	632.943	508.577	565.624	608.427	601.426
2900097C17Rik	7383.81	0.103445	0.177855	0.581624	0.56082	0.999996	6891.58	7896.43	8155.98	8811.44	6197.8	6349.62
3000002C10Rik	20.4283	0.14585	0.618674	0.235746	0.81363	0.999996	21.9382	25.9459	16.4057	15.985	22.173	20.122
3010001F23Rik	18.872	0.468342	0.670323	0.698681	0.484752	0.999996	19.9438	15.7041	30.4677	11.0666	20.3992	15.6505
3010026O09Rik	77.9172	0.446934	0.419791	1.06466	0.28703	0.999996	99.719	79.2032	91.4032	31.9701	82.4836	82.724
3100003L05Rik	23.5392	1.07952	0.609304	1.77173	0.0764395	0.999996	21.9382	38.9188	35.1551	12.2962	19.5122	13.4147
3110001D03Rik	1556.61	0.0632827	0.167212	0.378458	0.70509	0.999996	1792.95	1635.96	1342.92	1453.41	1614.2	1500.21
3110001I22Rik	64.2361	0.346463	0.425446	0.814351	0.415444	0.999996	79.7752	92.1762	43.3579	44.2662	57.6498	68.1914
3110002H16Rik	445.503	0.118655	0.191402	0.619926	0.535307	0.999996	521.53	436.983	433.579	397.166	461.199	422.563
3110003A17Rik	351.105	-0.237059	0.216409	-1.09542	0.273332	0.999996	369.957	302.474	295.303	340.604	441.686	356.607
3110007F17Rik	78.5985	-0.0126343	0.347281	-0.0363807	0.970979	0.999996	81.7696	77.8377	74.9975	70.0882	67.4059	99.4923
3110009E18Rik	44.04	0.281663	0.439858	0.64035	0.521945	0.999996	55.8426	52.5746	36.3269	41.807	40.7983	36.8904
3110021N24Rik	65.7113	0.208576	0.408557	0.510517	0.609689	0.999996	76.7836	75.1065	59.7636	54.1032	86.0313	42.4799
3110039I08Rik	12.789	-0.331051	0.887688	-0.372936	0.709196	0.999996	17.9494	12.2902	3.51551	13.5258	7.09536	22.3578
3110040N11Rik	273.318	0.002181	0.225216	0.00968405	0.992273	0.999996	322.092	250.583	248.429	261.909	299.779	257.115
3110043O21Rik	255.043	-0.310914	0.273585	-1.13644	0.255771	0.999996	204.424	203.47	276.553	250.842	372.507	222.46
3110045C21Rik	60.6074	0.263638	0.414133	0.636603	0.524383	0.999996	88.7499	45.7467	64.451	49.1847	62.9713	52.5409
3110052M02Rik	248.847	0.0222244	0.214692	0.103517	0.917552	0.999996	260.267	230.099	262.491	236.087	244.79	259.351
3110056K07Rik	151.845	-0.116988	0.325857	-0.359017	0.719582	0.999996	192.458	124.267	120.699	111.895	160.533	201.22
3110056O03Rik	930.645	-0.0689853	0.163338	-0.422346	0.672773	0.999996	859.578	921.762	944.5	847.206	996.899	1013.93
3110057O12Rik	85.5871	0.378406	0.483483	0.782665	0.433824	0.999996	45.8707	108.563	135.933	43.0366	63.8583	116.261
3110062M04Rik	4841.39	0.124812	0.190003	0.656894	0.511249	0.999996	4600.04	4905.82	5648.25	4079.87	5879.4	3934.98
3110070M22Rik	43.5379	-0.4814	0.624148	-0.771291	0.440534	0.999996	50.8567	45.0639	12.8902	19.6739	61.1975	71.545
3110082D06Rik	388.472	-0.0919531	0.286283	-0.321196	0.748062	0.999996	256.278	529.16	342.176	327.078	490.467	385.673
3110082I17Rik	131.766	-0.00744495	0.27631	-0.0269442	0.978504	0.999996	132.626	129.729	132.417	110.666	149.89	135.265
3110099E03Rik	4.16893	-2.8998	1.99462	-1.45381	0.145999	0.999996	2.99157	0	0	8.60732	0	13.4147
3200001D21Rik	4.21094	0.684736	1.4588	0.469382	0.638796	0.999996	10.9691	3.41393	1.17184	1.22962	1.77384	6.70735
3200002M19Rik	95.3108	-0.0771721	0.337334	-0.22877	0.819048	0.999996	90.7443	73.0582	114.84	109.436	79.8228	103.964
3230401D17Rik	1443.21	-0.0954003	0.168753	-0.565325	0.571853	0.999996	1575.56	1293.88	1318.32	1316.92	1648.78	1505.8
3300002I08Rik	22.8512	0.505599	0.582802	0.86753	0.385651	0.999996	27.9213	30.0426	22.2649	19.6739	15.9646	21.2399
3830403N18Rik	87.9158	0.101273	0.497793	0.203443	0.838789	0.999996	102.711	84.6655	85.544	40.5774	49.6675	164.33
3830406C13Rik	983.136	-0.0090702	0.175976	-0.0515423	0.958893	0.999996	1067.99	911.52	962.077	844.747	1113.09	999.395
3830408C21Rik	21.913	0.760736	0.785219	0.968821	0.332635	0.999996	4.98595	47.1123	30.4677	15.985	19.5122	13.4147
3930402G23Rik	10.0613	0.614716	0.852912	0.720726	0.471078	0.999996	10.9691	11.6074	14.062	6.14809	9.75612	7.82524
4430402I18Rik	69.9769	0.207752	0.41304	0.502982	0.614977	0.999996	88.7499	52.5746	84.3722	70.0882	81.5967	42.4799
4632411B12Rik	1561.66	0.20161	0.238692	0.844643	0.39831	0.999996	1170.7	1685.8	2155.01	1807.54	1219.52	1331.41
4632415K11Rik	87.6741	0.357568	0.427791	0.835846	0.403241	0.999996	60.8286	96.9557	138.277	44.2662	89.579	96.1387
4632415L05Rik	364.974	0.214543	0.21904	0.979469	0.327348	0.999996	329.073	438.349	408.971	325.849	390.245	297.359
4632427E13Rik	160.552	-0.204522	0.295888	-0.691214	0.489431	0.999996	170.519	157.724	119.527	132.799	217.295	165.448
4632428N05Rik	389.205	0.177072	0.249933	0.708478	0.478648	0.999996	284.199	441.08	514.436	354.13	402.662	338.721
4632434I11Rik	9.85431	0.403685	1.0049	0.401717	0.687892	0.999996	11.9663	2.04836	19.9212	7.3777	8.8692	8.94313
4732416N19Rik	18.4091	-0.066741	0.813888	-0.0820027	0.934645	0.999996	3.98876	15.0213	35.1551	23.3627	19.5122	13.4147
4732418C07Rik	1919.3	0.115246	0.164673	0.699849	0.484021	0.999996	1822.86	2348.79	1814	1893.61	1764.08	1872.47
4732471D19Rik	247.836	-0.146917	0.263651	-0.557241	0.577363	0.999996	227.359	187.084	291.787	290.19	206.652	283.944
4732471J01Rik	14.6146	-0.526644	0.804483	-0.654636	0.512702	0.999996	5.98314	17.0697	12.8902	11.0666	28.3815	12.2968
4732491K20Rik	21.8397	0.038056	0.687425	0.0553602	0.955851	0.999996	9.9719	27.3115	29.2959	13.5258	31.9291	19.0042
4831426I19Rik	143.193	0.0430127	0.368979	0.116572	0.907199	0.999996	74.7892	149.53	212.102	143.865	152.55	126.322
4831440E17Rik	16.54	-0.386727	0.795495	-0.486146	0.626864	0.999996	25.9269	5.46229	11.7184	23.3627	11.53	21.2399
4832428D23Rik	72.2077	-0.316616	0.555337	-0.570133	0.568587	0.999996	97.7246	72.3754	22.2649	130.339	69.1798	41.362
4833403I15Rik	25.4937	-1.08756	0.690563	-1.5749	0.11528	0.999996	10.9691	8.19344	30.4677	34.4293	48.7806	20.122
4833417C18Rik	10.5342	-0.278157	1.00602	-0.276492	0.782171	0.999996	0.99719	12.2902	15.2339	15.985	9.75612	8.94313
4833418N02Rik	31.8056	0.646249	0.528218	1.22345	0.221159	0.999996	48.8623	40.2844	26.9522	29.5108	19.5122	25.7115
4833419F23Rik	26.3839	-0.21548	0.593618	-0.362993	0.71661	0.999996	19.9438	21.8492	31.6396	18.4443	23.9469	42.4799
4833420G17Rik	634.818	-0.314796	0.224428	-1.40266	0.160719	0.999996	646.179	578.32	473.422	536.113	859.426	715.45
4833422C13Rik	48.11	0.0280006	0.42998	0.0651206	0.948078	0.999996	45.8707	59.4024	39.8424	55.3328	39.0245	49.1872
4833424O15Rik	84.6428	-0.576799	0.610657	-0.944555	0.344886	0.999996	108.694	35.5049	59.7636	57.792	33.703	212.399
4833439L19Rik	3255.14	-0.0705286	0.137627	-0.512461	0.608328	0.999996	3278.76	3004.94	3243.64	3238.81	3205.33	3559.37
4833442J19Rik	184.042	0.247803	0.302222	0.819935	0.412253	0.999996	148.581	202.105	249.601	121.732	197.783	184.452
4921507L20Rik	5.2787	-0.908065	1.19494	-0.759923	0.4473	0.999996	5.98314	2.73115	2.34367	3.68885	7.98228	8.94313
4921508A21Rik	34.673	-0.250854	0.509125	-0.492715	0.622214	0.999996	37.8932	34.8221	22.2649	30.7404	48.7806	33.5367
4921511C10Rik	19.8271	0.756005	0.708065	1.06771	0.285653	0.999996	16.9522	27.3115	30.4677	20.9035	17.7384	5.58946
4921511I17Rik	7.59133	0.665977	1.00098	0.665325	0.505843	0.999996	6.98033	8.19344	12.8902	6.14809	7.98228	3.35367
4921513D23Rik	168.873	0.420473	0.367795	1.14323	0.252944	0.999996	122.654	290.184	166.401	168.458	169.402	96.1387
4921517L17Rik	143.815	-0.255944	0.311114	-0.822671	0.410695	0.999996	156.559	91.4934	146.479	129.11	178.271	160.976
4921523A10Rik	256.234	-0.348324	0.230012	-1.51437	0.129932	0.999996	220.379	207.567	249.601	241.005	323.726	295.123
4921524J17Rik	556.07	-0.136461	0.238445	-0.572297	0.567121	0.999996	660.14	410.355	520.295	451.27	635.922	658.438
4921530L18Rik	11.6332	-0.525542	0.795528	-0.66062	0.508856	0.999996	11.9663	9.55901	7.03102	14.7554	14.1907	12.2968
4921531C22Rik	162.63	0.210775	0.309728	0.680516	0.496177	0.999996	195.449	180.938	146.479	130.339	113.526	209.046
4922501C03Rik	102.863	0.324921	0.410707	0.791127	0.42887	0.999996	76.7836	156.358	110.153	50.4143	120.621	102.846
4922505G16Rik	66.6224	0.0107764	0.403205	0.0267268	0.978678	0.999996	53.8482	73.741	72.6538	63.9401	46.1199	89.4313
4930402H24Rik	886.572	0.175868	0.189577	0.927684	0.353571	0.999996	874.535	959.315	986.686	1018.12	722.84	757.93
4930403N07Rik	29.5022	0.127381	0.531002	0.239887	0.810418	0.999996	22.9354	28.677	41.0143	25.822	28.3815	30.1831
4930404N11Rik	90.5784	0.467315	0.398579	1.17245	0.241015	0.999996	62.823	150.896	100.778	92.2213	62.9713	73.7808
4930405A21Rik	8.64128	-0.397737	1.26438	-0.31457	0.753088	0.999996	7.97752	9.55901	4.68734	6.14809	0	23.4757
4930405P13Rik	347.314	-0.0693029	0.206479	-0.335642	0.737141	0.999996	339.045	366.656	310.537	322.16	339.691	405.795
4930412C18Rik	79.7741	0.776849	0.402636	1.92941	0.0536805	0.999996	119.663	61.4508	121.871	44.2662	62.0844	69.3093
4930413G21Rik	138.24	0.221467	0.286458	0.773123	0.43945	0.999996	154.564	171.379	119.527	136.488	109.978	137.501
4930414L22Rik	438.06	0.054988	0.22544	0.243914	0.807297	0.999996	518.539	380.995	440.61	344.293	431.93	511.994
4930414N06Rik	11.4739	0.143427	0.845529	0.16963	0.865301	0.999996	5.98314	13.6557	16.4057	14.7554	7.98228	10.061
4930415F15Rik	4.56059	-0.680864	1.44648	-0.470703	0.637853	0.999996	6.98033	3.41393	0	9.83694	2.66076	4.47157
4930417G10Rik	3.24231	0.48397	1.5385	0.314573	0.753086	0.999996	0.99719	3.41393	7.03102	2.45923	4.4346	1.11789
4930420K17Rik	666.272	-0.0413335	0.166019	-0.248969	0.803385	0.999996	681.081	663.669	624.589	707.03	627.053	694.211
4930422G04Rik	12.9438	0.973602	0.818517	1.18947	0.234254	0.999996	11.9663	11.6074	28.1241	6.14809	9.75612	10.061
4930427A07Rik	27.0177	1.51043	0.771838	1.95692	0.0503565	0.999996	50.8567	49.1606	19.9212	2.45923	10.643	29.0652
4930430F08Rik	136.979	0.196464	0.33777	0.58165	0.560802	0.999996	128.637	163.869	146.479	77.4659	132.151	173.273
4930432K21Rik	4.70003	1.69958	1.4571	1.16642	0.243446	0.999996	0.99719	15.7041	4.68734	3.68885	0.88692	2.23578
4930441O14Rik	26.1694	0.716617	0.659874	1.08599	0.277483	0.999996	38.8904	37.5533	21.093	27.0516	25.7207	6.70735
4930444A02Rik	1593.54	0.300951	0.148633	2.02479	0.0428886	0.999996	1902.64	1626.4	1749.55	1379.63	1490.03	1413.01
4930447N08Rik	10.9834	0.0983249	0.958237	0.10261	0.918272	0.999996	7.97752	12.2902	14.062	2.45923	21.2861	7.82524
4930453N24Rik	1125.11	-0.250627	0.192245	-1.30369	0.192341	0.999996	1285.38	882.843	915.204	1277.57	1250.56	1139.13
4930455C13Rik	111.849	-0.154701	0.307034	-0.503856	0.614363	0.999996	101.713	98.3213	118.355	103.288	145.455	103.964
4930455C21Rik	197.475	0.0672768	0.324452	0.207355	0.835732	0.999996	252.289	195.96	157.026	279.123	138.36	162.094
4930455F23Rik	7.24345	-0.530009	1.28411	-0.412744	0.679794	0.999996	7.97752	6.14508	3.51551	13.5258	0	12.2968
4930455H04Rik	41.249	-0.0609621	0.510691	-0.119372	0.904981	0.999996	55.8426	36.8705	28.1241	43.0366	26.6076	57.0125
4930470H14Rik	256.186	-0.017609	0.315728	-0.0557726	0.955523	0.999996	173.511	277.211	312.88	351.671	247.451	174.391
4930471I20Rik	22.4001	0.680289	0.646455	1.05234	0.292644	0.999996	36.896	32.7738	12.8902	15.985	16.8515	19.0042
4930471M23Rik	1177.64	0.115194	0.168757	0.682605	0.494856	0.999996	1319.28	1281.59	1072.23	1207.48	1176.94	1008.34
4930473A02Rik	733.244	-0.0307644	0.179057	-0.171813	0.863584	0.999996	655.154	703.27	819.113	662.764	786.698	772.463
4930473A06Rik	61.6241	0.156486	0.392002	0.399195	0.689749	0.999996	49.8595	74.4237	70.3102	70.0882	55.876	49.1872
4930478L05Rik	14.1712	-0.74618	0.929271	-0.802973	0.42199	0.999996	11.9663	13.6557	5.85918	36.8885	13.3038	3.35367
4930481A15Rik	157.373	0.422366	0.316592	1.3341	0.182171	0.999996	185.477	172.745	181.635	186.902	87.8051	129.675
4930483K19Rik	9.27827	0.234132	0.924091	0.253365	0.799986	0.999996	4.98595	12.2902	12.8902	6.14809	11.53	7.82524
4930486L24Rik	22.4529	0.107442	0.648821	0.165595	0.868475	0.999996	21.9382	31.4082	16.4057	11.0666	24.8338	29.0652
4930487H11Rik	3.35709	0.741133	1.65381	0.448136	0.654055	0.999996	7.97752	3.41393	1.17184	4.91847	2.66076	0
4930488L21Rik	7.09806	1.20453	1.13567	1.06063	0.288856	0.999996	3.98876	11.6074	14.062	7.3777	4.4346	1.11789
4930502A04Rik	4.4054	2.27249	1.64737	1.37947	0.167751	0.999996	12.9635	0.682787	8.20285	1.22962	0	3.35367
4930503B20Rik	9.09058	1.06921	0.933117	1.14585	0.251858	0.999996	6.98033	17.0697	12.8902	4.91847	7.09536	5.58946
4930503E14Rik	7.15082	-0.490169	1.16238	-0.421693	0.673249	0.999996	9.9719	2.04836	5.85918	9.83694	1.77384	13.4147
4930503L19Rik	166.076	-0.464961	0.305695	-1.521	0.128261	0.999996	101.713	167.966	148.823	142.636	212.861	222.46
4930505A04Rik	11.417	0.982293	0.957781	1.02559	0.305084	0.999996	23.9326	14.3385	7.03102	14.7554	6.20844	2.23578
4930507D05Rik	32.7434	0.184237	0.537311	0.342887	0.731683	0.999996	39.8876	25.2631	39.8424	18.4443	37.2507	35.7725
4930511M06Rik	68.1323	0.355528	0.359841	0.988014	0.323146	0.999996	68.8061	90.1278	70.3102	57.792	64.7452	57.0125
4930512B01Rik	55.8105	-0.205079	0.396835	-0.516786	0.605305	0.999996	40.8848	53.9401	60.9355	52.8736	64.7452	61.484
4930513N10Rik	13.1386	-0.388565	0.880246	-0.441428	0.658903	0.999996	12.9635	2.73115	18.7494	19.6739	12.4169	12.2968
4930515G01Rik	11.2885	0.102282	0.821474	0.12451	0.900911	0.999996	14.9578	12.9729	7.03102	12.2962	11.53	8.94313
4930519F09Rik	20.3305	0.0523021	0.665823	0.0785525	0.937389	0.999996	11.9663	28.677	21.093	27.0516	14.1907	19.0042
4930519G04Rik	16.5111	-0.251683	0.685378	-0.367217	0.713457	0.999996	11.9663	19.118	14.062	17.2146	22.173	14.5326
4930521E06Rik	3.14272	1.1724	1.70172	0.688953	0.490853	0.999996	6.98033	4.77951	1.17184	3.68885	0	2.23578
4930523C07Rik	588.235	-0.23995	0.222078	-1.08048	0.279929	0.999996	449.733	581.051	588.262	584.068	800.889	525.409
4930524L23Rik	5.96346	-0.31189	1.13631	-0.274477	0.783718	0.999996	5.98314	7.51065	2.34367	8.60732	7.98228	3.35367
4930524O05Rik	3.51971	0.411939	1.4642	0.281341	0.778449	0.999996	2.99157	2.04836	7.03102	3.68885	0.88692	4.47157
4930525G20Rik	8.1376	0.00754624	0.975193	0.0077382	0.993826	0.999996	7.97752	8.19344	8.20285	8.60732	3.54768	12.2968
4930526I15Rik	102.055	0.187946	0.322107	0.583489	0.559564	0.999996	118.666	126.998	79.6848	98.3694	91.3528	97.2565
4930528A17Rik	9.65626	-0.39804	0.980751	-0.405852	0.684852	0.999996	5.98314	7.51065	11.7184	2.45923	16.8515	13.4147
4930528F23Rik	70.9844	0.201495	0.369284	0.545638	0.585314	0.999996	77.7808	62.8164	87.8877	63.9401	79.8228	53.6588
4930533B01Rik	14.5472	-0.0656106	0.791353	-0.0829093	0.933924	0.999996	11.9663	12.2902	18.7494	7.3777	25.7207	11.1789
4930534B04Rik	68.7943	0.261999	0.571854	0.458158	0.646839	0.999996	33.9045	99.0041	92.575	44.2662	116.187	26.8294
4930539E08Rik	6.24848	1.14257	1.18143	0.967112	0.333488	0.999996	14.9578	6.14508	4.68734	6.14809	4.4346	1.11789
4930539J05Rik	13.6165	0.31831	0.763628	0.41684	0.676796	0.999996	13.9607	17.0697	14.062	17.2146	7.09536	12.2968
4930547N16Rik	11.8991	0.966102	1.29349	0.746897	0.455126	0.999996	29.9157	0	17.5775	1.22962	15.9646	6.70735
4930549G23Rik	158.353	0.0030653	0.265765	0.0115339	0.990797	0.999996	166.531	150.213	159.37	159.85	184.479	129.675
4930550C14Rik	28.8342	-0.0806353	0.590165	-0.136632	0.891322	0.999996	19.9438	38.236	25.7804	15.985	32.8161	40.2441
4930556M19Rik	114.774	0.386542	0.302065	1.27966	0.200664	0.999996	130.632	117.439	142.964	79.9251	117.073	100.61
4930562F07Rik	200.093	-0.305698	0.274291	-1.1145	0.265064	0.999996	141.601	234.879	159.37	223.79	238.582	202.338
4930563E22Rik	30.8816	-0.380319	0.640292	-0.593977	0.552527	0.999996	14.9578	30.7254	35.1551	23.3627	62.0844	19.0042
4930563F08Rik	11.028	0.699267	0.910904	0.767663	0.442688	0.999996	5.98314	16.3869	18.7494	3.68885	12.4169	8.94313
4930570G19Rik	46.7965	0.245738	0.504024	0.487553	0.625867	0.999996	45.8707	68.2787	37.4987	40.5774	24.8338	63.7198
4930572J05Rik	51.1856	0.813906	0.53152	1.53128	0.1257	0.999996	55.8426	83.9828	55.0763	62.7105	15.9646	33.5367
4930578N16Rik	20.141	-0.345103	0.634722	-0.543707	0.586643	0.999996	11.9663	24.5803	16.4057	23.3627	22.173	22.3578
4930579G18Rik	23.4236	-0.817662	0.667771	-1.22447	0.220777	0.999996	15.955	20.4836	14.062	52.8736	20.3992	16.7684
4930579G22Rik	8.86914	1.09541	1.04768	1.04556	0.295762	0.999996	11.9663	6.82787	17.5775	1.22962	4.4346	11.1789
4930579G24Rik	104.719	-0.732043	0.355616	-2.05852	0.0395403	0.999996	76.7836	107.88	50.3889	126.651	148.116	118.496
4930579K19Rik	21.8555	-0.266616	0.741408	-0.359607	0.719141	0.999996	18.9466	26.6287	14.062	8.60732	46.1199	16.7684
4930581F22Rik	26.64	-0.174868	0.61114	-0.286135	0.774775	0.999996	15.955	32.091	26.9522	15.985	27.4945	41.362
4930588N13Rik	3.70267	1.63029	1.68701	0.966381	0.333854	0.999996	11.9663	4.77951	0	1.22962	0.88692	3.35367
4930592A05Rik	1528.6	-0.130215	0.155193	-0.839053	0.401439	0.999996	1481.82	1539	1358.16	1454.64	1751.67	1586.29
4930599N23Rik	69.5594	0.367554	0.38335	0.958797	0.337661	0.999996	54.8454	81.9344	98.4342	66.3993	62.0844	53.6588
4931402G19Rik	52.8572	-0.142852	0.425884	-0.335424	0.737306	0.999996	53.8482	63.4992	32.8114	56.5624	56.7629	53.6588
4931403E22Rik	28.0619	-0.0302269	0.600296	-0.0503533	0.959841	0.999996	16.9522	21.1664	45.7016	23.3627	35.4768	25.7115
4931403G20Rik	40.957	0.0992208	0.514698	0.192775	0.847135	0.999996	21.9382	40.9672	64.451	39.3478	39.9114	39.1262
4931406B18Rik	6.53229	-0.0857482	1.05294	-0.081437	0.935094	0.999996	3.98876	6.82787	8.20285	8.60732	7.09536	4.47157
4931406C07Rik	161.667	0.371756	0.310426	1.19757	0.231084	0.999996	213.399	196.643	135.933	180.754	104.657	138.619
4931406H21Rik	62.3921	0.555889	0.624164	0.890614	0.373136	0.999996	67.8089	123.584	30.4677	100.829	24.8338	26.8294
4931406P16Rik	1572.61	0.314958	0.236333	1.33268	0.182636	0.999996	1194.63	1894.73	2142.12	1422.67	1669.18	1112.3
4931408A02Rik	752.688	0.0993519	0.239752	0.414394	0.678586	0.999996	838.637	746.286	752.319	608.661	1014.64	555.592
4931408D14Rik	88.1636	1.30231	0.670694	1.94173	0.05217	0.999996	48.8623	152.261	175.775	44.2662	101.109	6.70735
4931414P19Rik	161.616	0.0274071	0.322728	0.0849233	0.932322	0.999996	107.696	226.002	154.682	185.672	152.55	143.09
4931428F04Rik	301.524	-0.0277417	0.217486	-0.127556	0.8985	0.999996	320.098	246.486	330.458	295.108	305.101	311.892
4931430N09Rik	8.38221	-0.75034	1.12118	-0.669239	0.503343	0.999996	0.99719	11.6074	5.85918	15.985	3.54768	12.2968
4931431C16Rik	62.8467	-0.371759	0.377784	-0.98405	0.325091	0.999996	60.8286	56.6713	46.8734	70.0882	83.3705	59.2482
4931440F15Rik	12.4105	-0.175234	0.807109	-0.217114	0.82812	0.999996	8.97471	12.9729	12.8902	13.5258	7.09536	19.0042
4931440J10Rik	23.85	0.0949636	0.586503	0.161915	0.871373	0.999996	18.9466	21.1664	33.9832	25.822	23.0599	20.122
4931440P22Rik	39.9647	0.128382	0.460643	0.278702	0.780474	0.999996	47.8651	40.9672	36.3269	31.9701	34.5899	48.0693
4932411L15	271.681	-0.0523586	0.270679	-0.193435	0.846619	0.999996	197.444	350.27	251.945	256.99	326.387	247.054
4932415G12Rik	496.943	0.200142	0.23016	0.869577	0.384532	0.999996	503.581	431.521	660.915	373.804	518.848	492.99
4932416H05Rik	158.14	0.036047	0.269783	0.133615	0.893707	0.999996	128.637	176.842	174.604	170.917	156.985	140.854
4932438A13Rik	600.404	-0.0353365	0.207389	-0.170388	0.864705	0.999996	459.705	608.363	711.304	608.661	573.837	640.552
4932702P03Rik	11.755	1.3442	0.841514	1.59735	0.110187	0.999996	19.9438	17.7525	12.8902	8.60732	7.98228	3.35367
4933400A11Rik	7.43412	-1.50818	1.10337	-1.36689	0.171659	0.999996	7.97752	1.36557	2.34367	13.5258	7.09536	12.2968
4933400F21Rik	6.02545	0.412306	1.09742	0.375704	0.707137	0.999996	5.98314	7.51065	7.03102	7.3777	2.66076	5.58946
4933403F05Rik	786.479	-0.013134	0.178182	-0.0737111	0.94124	0.999996	786.783	673.228	890.595	759.904	838.14	770.227
4933403G14Rik	92.9512	0.368758	0.466114	0.791134	0.428866	0.999996	150.576	73.0582	91.4032	33.1997	109.978	99.4923
4933404O12Rik	58.5638	0.294053	0.428337	0.686498	0.492399	0.999996	42.8792	69.6442	80.8567	67.629	47.8937	42.4799
4933407C03Rik	1197.73	-0.0680707	0.199989	-0.340372	0.733576	0.999996	896.474	1456.38	1154.26	1176.74	1229.27	1273.28
4933407H18Rik	121.419	-0.067405	0.347203	-0.194137	0.846069	0.999996	73.792	139.971	141.792	145.095	129.49	98.3744
4933407K13Rik	26.802	0.513048	0.62654	0.818859	0.412867	0.999996	17.9494	26.6287	50.3889	13.5258	26.6076	25.7115
4933408J17Rik	50.0682	-0.19907	0.443132	-0.449235	0.653262	0.999996	58.8342	47.7951	32.8114	55.3328	40.7983	64.8377
4933409K07Rik	1151.93	-0.179726	0.176376	-1.01899	0.308207	0.999996	1087.93	1098.6	1053.48	1449.72	1186.7	1035.17
4933411E08Rik	19.491	0.660276	0.762669	0.865743	0.386631	0.999996	7.97752	32.091	31.6396	7.3777	17.7384	20.122
4933411K20Rik	477.498	0.0529828	0.203087	0.260887	0.79418	0.999996	460.702	462.929	536.701	411.922	557.873	434.86
4933412E12Rik	337.784	-0.277688	0.25619	-1.08391	0.278403	0.999996	381.924	273.115	261.319	291.419	353.881	465.043
4933416E03Rik	4.90514	0.179528	1.3167	0.136347	0.891547	0.999996	8.97471	2.04836	4.68734	1.22962	3.54768	8.94313
4933417D19Rik	19.1972	0.0475473	0.634238	0.0749676	0.94024	0.999996	14.9578	19.118	24.6086	18.4443	21.2861	16.7684
4933421E11Rik	355.851	-0.00505694	0.243028	-0.020808	0.983399	0.999996	297.163	413.769	355.066	286.501	446.121	336.485
4933424B01Rik	465.923	-0.0766498	0.185382	-0.41347	0.679262	0.999996	449.733	461.564	448.813	466.025	432.817	536.588
4933426D04Rik	6.63964	0.135064	1.14954	0.117494	0.906468	0.999996	1.99438	11.6074	7.03102	9.83694	2.66076	6.70735
4933426M11Rik	3992.71	-0.0608806	0.199958	-0.304466	0.760773	0.999996	3383.47	3216.61	5126.78	4402.03	3687.81	4139.55
4933427D14Rik	88.3817	0.317597	0.368003	0.863028	0.388122	0.999996	100.716	65.5475	128.902	76.2363	89.579	69.3093
4933427G17Rik	3.35994	-0.620978	1.74069	-0.356742	0.721285	0.999996	0.99719	6.82787	0	1.22962	8.8692	2.23578
4933430H15Rik	185.657	-0.0947184	0.342325	-0.276691	0.782017	0.999996	107.696	238.975	191.009	256.99	160.533	158.741
4933430I17Rik	3.12017	1.00494	1.76191	0.570369	0.568428	0.999996	0	2.04836	10.5465	1.22962	2.66076	2.23578
4933431E20Rik	90.7671	0.140831	0.336044	0.419084	0.675155	0.999996	92.7387	88.7623	104.293	70.0882	78.049	110.671
4933432B09Rik	5.53812	0.702462	1.48649	0.472563	0.636525	0.999996	8.97471	10.2418	1.17184	11.0666	1.77384	0
4933433G19Rik	217.334	-0.091447	0.228173	-0.400779	0.688583	0.999996	230.351	195.277	206.243	204.116	233.26	234.757
4933433H22Rik	6.59703	-0.565199	1.16518	-0.485072	0.627625	0.999996	9.9719	1.36557	4.68734	11.0666	3.54768	8.94313
4933433P14Rik	995.611	-0.0559622	0.163754	-0.341746	0.732542	0.999996	1016.14	939.514	973.796	1073.46	1082.04	888.724
4933434E20Rik	1138.5	0.0689611	0.19365	0.356111	0.721757	0.999996	1307.32	1277.49	910.517	1250.52	1042.13	1042.99
4933439C10Rik	119.54	-0.0767374	0.314913	-0.243678	0.80748	0.999996	89.7471	116.757	142.964	102.058	121.508	144.208
4933439F18Rik	716.103	0.00869479	0.201683	0.0431112	0.965613	0.999996	559.423	728.533	867.159	727.934	684.703	728.865
5031410I06Rik	37.9352	0.76762	0.504218	1.5224	0.12791	0.999996	59.8314	35.5049	48.0453	25.822	20.3992	38.0083
5031425E22Rik	522.619	0.206372	0.22759	0.906769	0.364529	0.999996	416.825	573.541	690.211	424.218	509.979	520.937
5031426D15Rik	10.2272	-2.14479	1.12354	-1.90895	0.056269	0.999996	2.99157	6.82787	1.17184	29.5108	18.6253	2.23578
5031434C07Rik	5.77255	-1.48007	1.46346	-1.01135	0.311849	0.999996	0.99719	6.82787	1.17184	1.22962	22.173	2.23578
5031439G07Rik	831.075	0.115022	0.201517	0.570784	0.568146	0.999996	728.946	998.234	863.643	954.183	693.572	747.869
5033406O09Rik	5.88071	-1.10236	1.28071	-0.860738	0.389382	0.999996	7.97752	2.04836	1.17184	14.7554	7.09536	2.23578
5033411D12Rik	47.6961	-0.260455	0.446996	-0.582679	0.560109	0.999996	29.9157	49.8434	50.3889	59.0216	56.7629	40.2441
5033414D02Rik	614.814	-0.168343	0.193492	-0.870026	0.384286	0.999996	700.027	526.428	510.92	627.105	679.381	645.023
5133401N09Rik	734.239	0.00475116	0.201714	0.0235539	0.981208	0.999996	893.482	710.781	601.152	783.266	651	765.756
5330426P16Rik	300.208	-0.389067	0.213944	-1.81854	0.0689814	0.999996	229.354	262.19	288.272	377.493	317.517	326.424
5330437I02Rik	11.1004	-1.29621	1.17036	-1.10753	0.268067	0.999996	4.98595	0.682787	14.062	4.91847	36.3637	5.58946
5330439B14Rik	17.7077	0.518246	0.683499	0.758225	0.448316	0.999996	15.955	18.4352	28.1241	19.6739	10.643	13.4147
5430402O13Rik	6.15403	0.47387	1.23647	0.383246	0.701537	0.999996	4.98595	12.9729	3.51551	3.68885	10.643	1.11789
5430403N17	52.4734	0.166737	0.41259	0.404123	0.686122	0.999996	50.8567	53.9401	62.1073	46.7255	62.0844	39.1262
5430405H02Rik	277.166	0.160958	0.208175	0.773184	0.439414	0.999996	287.191	308.62	281.241	284.042	244.79	257.115
5430411K18Rik	276.264	0.506778	0.308319	1.64368	0.100242	0.999996	216.39	432.887	322.255	306.175	185.366	194.513
5430416N02Rik	19.5061	0.511828	0.787157	0.650224	0.515548	0.999996	9.9719	45.7467	12.8902	11.0666	23.9469	13.4147
5430416O09Rik	107.207	0.141878	0.45185	0.313993	0.753526	0.999996	56.8398	157.724	123.043	81.1548	159.646	64.8377
5430417L22Rik	978.234	0.046304	0.2246	0.206163	0.836664	0.999996	796.755	1233.8	949.187	1205.03	807.098	877.545
5430419D17Rik	4.36921	-0.544199	1.39819	-0.389215	0.697117	0.999996	1.99438	6.14508	2.34367	11.0666	3.54768	1.11789
5430421F17Rik	60.7102	-0.294072	0.443728	-0.66273	0.507504	0.999996	43.8764	66.9131	52.7326	38.1181	70.9536	91.6671
5430427O19Rik	18.9001	0.141176	0.727971	0.19393	0.84623	0.999996	10.9691	21.8492	26.9522	12.2962	30.1553	11.1789
5430435G22Rik	49.6532	-0.433003	0.497961	-0.869553	0.384545	0.999996	26.9241	30.0426	70.3102	68.8586	47.0068	54.7767
5430437P03Rik	1105.67	0.104959	0.154834	0.677884	0.497845	0.999996	1231.53	1107.48	1099.18	1056.24	1133.48	1006.1
5530601H04Rik	223.749	0.178944	0.226773	0.789086	0.430062	0.999996	252.289	235.561	224.992	189.361	206.652	233.639
5730403B10Rik	1904.19	0.0447866	0.14236	0.314602	0.753064	0.999996	1841.81	2072.26	1886.66	1810	1935.26	1879.18
5730405O15Rik	10.742	0.308181	1.03729	0.297103	0.766388	0.999996	1.99438	6.82787	26.9522	13.5258	6.20844	8.94313
5730409E04Rik	82.6412	-0.104922	0.376111	-0.278964	0.780272	0.999996	85.7583	84.6655	67.9665	119.273	78.9359	59.2482
5730419I09Rik	194.904	0.181771	0.25952	0.700415	0.483668	0.999996	207.415	204.836	208.587	232.398	155.211	160.976
5730420D15Rik	20.5159	0.108663	0.613246	0.177194	0.859356	0.999996	17.9494	25.9459	19.9212	17.2146	23.0599	19.0042
5730437N04Rik	886.787	0.103168	0.235034	0.438947	0.6607	0.999996	979.24	1084.95	689.04	1090.67	686.476	790.349
5730455O13Rik	211.985	-0.120312	0.238576	-0.504294	0.614055	0.999996	177.5	219.857	212.102	193.05	227.939	241.465
5730455P16Rik	576.213	-0.0717721	0.214404	-0.334751	0.737813	0.999996	486.629	557.154	643.338	493.077	723.727	553.356
5730469M10Rik	144.113	0.377553	0.32444	1.16371	0.244542	0.999996	199.438	157.724	131.246	95.9102	108.204	172.155
5730480H06Rik	9.04386	-0.161281	1.23553	-0.130536	0.896143	0.999996	4.98595	15.7041	4.68734	20.9035	7.98228	0
5730494M16Rik	527.324	-0.0329283	0.172219	-0.1912	0.848369	0.999996	542.471	518.235	502.718	549.639	501.997	548.885
5730494N06Rik	1095.96	-0.0750817	0.162362	-0.462433	0.643771	0.999996	1211.59	997.551	993.717	1093.13	1161.87	1117.89
5730507C01Rik	179.556	0.0855769	0.258272	0.331344	0.740384	0.999996	168.525	163.186	223.821	158.621	176.497	186.688
5730508B09Rik	226.804	0.185418	0.225297	0.822992	0.410513	0.999996	251.292	240.341	232.024	211.494	189.801	235.875
5730522E02Rik	5.18365	0.143581	1.39782	0.102718	0.918187	0.999996	9.9719	4.09672	2.34367	0	7.98228	6.70735
5730528L13Rik	303.455	-0.165695	0.219909	-0.753471	0.451167	0.999996	265.252	309.302	283.584	265.597	337.03	359.961
5730577I03Rik	46.4363	0.681743	0.484803	1.40623	0.159657	0.999996	48.8623	52.5746	70.3102	47.9551	39.9114	19.0042
5730590G19Rik	12.0663	-0.750103	2.61486	-0.286861	0.774218	0.999996	7.97752	17.7525	1.17184	45.4958	0	0
5830415F09Rik	89.5714	-0.406632	0.381063	-1.0671	0.285927	0.999996	103.708	72.3754	55.0763	71.3178	110.865	124.086
5830416P10Rik	6.4259	0.286726	1.04238	0.27507	0.783263	0.999996	7.97752	6.14508	7.03102	7.3777	4.4346	5.58946
5830417I10Rik	324.103	-0.124987	0.246602	-0.506838	0.612269	0.999996	234.34	344.807	350.379	407.003	300.666	307.42
5830418K08Rik	83.4016	-0.429689	0.386273	-1.1124	0.265968	0.999996	58.8342	81.2516	72.6538	135.258	88.692	63.7198
5830432E09Rik	2.96417	2.21593	1.79995	1.2311	0.218284	0.999996	0.99719	5.46229	8.20285	0	0.88692	2.23578
5830433M19Rik	319.317	0.00317877	0.211057	0.0150612	0.987983	0.999996	348.019	302.474	309.365	276.664	357.429	321.953
5930403L14Rik	98.9334	0.572498	0.464542	1.23239	0.217802	0.999996	85.7583	80.5688	188.666	129.11	60.3106	49.1872
5930416I19Rik	604.217	-0.188857	0.203387	-0.92856	0.353117	0.999996	573.384	663.669	455.844	573.002	665.19	694.211
5930434B04Rik	765.519	0.153112	0.168056	0.911077	0.362255	0.999996	896.474	744.237	778.099	695.963	719.292	759.048
6030408B16Rik	7.96991	0.329942	1.02798	0.320963	0.748239	0.999996	4.98595	15.7041	5.85918	3.68885	9.75612	7.82524
6030419C18Rik	86.7146	-0.099887	0.540526	-0.184796	0.853389	0.999996	71.7977	129.047	49.2171	173.376	48.7806	48.0693
6030422M02Rik	55.8643	0.1612	0.491778	0.327791	0.74307	0.999996	32.9073	92.859	50.3889	71.3178	45.2329	42.4799
6030429G01Rik	26.2876	0.238921	0.603765	0.395718	0.692313	0.999996	23.9326	18.4352	43.3579	29.5108	25.7207	16.7684
6030440G07Rik	3.57853	-0.16109	1.43615	-0.112168	0.91069	0.999996	1.99438	6.82787	1.17184	3.68885	4.4346	3.35367
6030446N20Rik	659.431	0.0138843	0.168995	0.0821581	0.934521	0.999996	694.044	635.674	658.572	682.438	690.024	595.836
6030458C11Rik	444.72	0.107915	0.216176	0.4992	0.617639	0.999996	425.8	443.811	515.608	333.226	469.181	480.693
6230400D17Rik	17.7722	-0.212529	0.727472	-0.292148	0.770174	0.999996	22.9354	19.118	7.03102	27.0516	15.9646	14.5326
6230409E13Rik	99.8007	-0.212938	0.481715	-0.442042	0.658459	0.999996	80.7724	64.1819	132.417	194.28	61.1975	65.9556
6230427J02Rik	225.853	-0.147016	0.296682	-0.495534	0.620224	0.999996	267.247	229.416	145.308	247.153	180.932	285.062
6330403K07Rik	12.7045	1.19865	0.806018	1.48713	0.13698	0.999996	21.9382	10.2418	21.093	7.3777	8.8692	6.70735
6330406I15Rik	158.018	-0.275027	0.256759	-1.07115	0.284102	0.999996	129.635	163.869	134.761	180.754	170.289	168.802
6330407A03Rik	7.70128	-0.428479	0.957935	-0.447295	0.654662	0.999996	7.97752	4.77951	7.03102	8.60732	8.8692	8.94313
6330408A02Rik	78.5504	0.0103166	0.461582	0.0223506	0.982168	0.999996	41.882	92.859	101.95	43.0366	84.2574	107.318
6330409D20Rik	26.8785	0.634803	0.594677	1.06748	0.285757	0.999996	31.9101	21.8492	44.5298	28.2812	21.2861	13.4147
6330409N04Rik	310.926	0.105471	0.239019	0.441265	0.659021	0.999996	367.963	343.442	255.46	249.612	345.012	304.066
6330416G13Rik	471.347	0.00456519	0.206442	0.0221136	0.982357	0.999996	531.502	434.252	449.985	507.832	385.81	518.702
6330418K02Rik	70.371	0.187479	0.388731	0.482283	0.629605	0.999996	78.778	77.8377	67.9665	51.6439	53.2152	92.785
6330439K17Rik	32.7058	0.0994427	0.617975	0.160917	0.872159	0.999996	30.9129	32.7738	37.4987	40.5774	9.75612	44.7157
6330503K22Rik	62.3312	-0.0491212	0.472737	-0.103908	0.917242	0.999996	42.8792	77.1549	63.2791	98.3694	57.6498	34.6546
6330545A04Rik	51.9395	0.306703	0.44558	0.688322	0.49125	0.999996	77.7808	49.8434	44.5298	60.2513	43.4591	35.7725
6330549D23Rik	34.1515	-0.143158	0.509761	-0.280833	0.778839	0.999996	29.9157	30.0426	37.4987	46.7255	37.2507	23.4757
6330578E17Rik	2173.44	0.0395421	0.177604	0.222641	0.823815	0.999996	2328.44	1848.3	2433.9	2465.38	2075.39	1889.24
6430527G18Rik	3183.81	0.332972	0.203715	1.6345	0.102154	0.999996	2925.75	3678.17	4045.18	3247.42	3098.01	2108.34
6430531B16Rik	12.3507	0.521563	0.88411	0.58993	0.555238	0.999996	4.98595	16.3869	22.2649	8.60732	6.20844	15.6505
6430548G04	41.5758	-0.272932	0.567442	-0.480987	0.630526	0.999996	29.9157	53.2574	29.2959	70.0882	47.8937	19.0042
6430548M08Rik	58.1005	-0.38131	0.40184	-0.948911	0.342666	0.999996	39.8876	48.4778	63.2791	75.0067	68.2929	53.6588
6430550D23Rik	4.33285	2.57391	1.68979	1.52321	0.127706	0.999996	13.9607	6.14508	2.34367	0	3.54768	0
6430562O15Rik	109.262	-0.219872	0.345267	-0.636818	0.524243	0.999996	90.7443	117.439	94.9187	82.3844	160.533	109.553
6430571L13Rik	9.33281	-0.305752	1.04867	-0.29156	0.770623	0.999996	12.9635	2.73115	9.37469	20.9035	4.4346	5.58946
6430573F11Rik	57.3467	1.1305	0.565804	1.99804	0.0457124	0.999996	33.9045	70.327	132.417	17.2146	39.9114	50.3051
6430598A04Rik	16.4342	1.11873	0.753516	1.48467	0.13763	0.999996	24.9297	28.677	14.062	7.3777	16.8515	6.70735
6530401N04Rik	459.819	0.0951904	0.215893	0.440915	0.659274	0.999996	558.426	479.999	386.706	387.329	503.771	442.685
6530402F18Rik	124.6	-0.0825582	0.350402	-0.23561	0.813735	0.999996	130.632	111.294	120.699	193.05	95.7874	96.1387
6720401G13Rik	78.1938	0.312308	0.430583	0.725314	0.468259	0.999996	63.8201	87.3967	108.981	83.614	89.579	35.7725
6720456B07Rik	3234.69	0.0135366	0.183061	0.0739459	0.941053	0.999996	3991.75	3169.5	2587.41	3426.94	3076.73	3155.81
6720456H20Rik	1004.56	0.301259	0.181404	1.66071	0.0967721	0.999996	1052.04	1001.65	1273.79	1032.88	827.497	839.536
6720463M24Rik	29.7993	-0.405863	0.562894	-0.721029	0.470892	0.999996	34.9016	23.2147	18.7494	24.5923	29.2684	48.0693
6720489N17Rik	70.443	-0.892353	0.506846	-1.7606	0.0783061	0.999996	32.9073	64.1819	50.3889	70.0882	45.2329	159.858
6820408C15Rik	3.05187	0.489832	1.48343	0.330202	0.741248	0.999996	3.98876	2.04836	4.68734	2.45923	1.77384	3.35367
6820431F20Rik	2684.01	-0.00535069	0.195977	-0.0273027	0.978218	0.999996	2083.13	2582.98	3372.54	2435.87	2919.74	2709.77
8030462N17Rik	70.7419	-0.332725	0.459817	-0.723603	0.46931	0.999996	70.8005	50.5262	66.7946	109.436	92.2397	34.6546
8430403D17Rik	7.74255	0.258899	0.996123	0.259907	0.794936	0.999996	5.98314	12.2902	7.03102	4.91847	10.643	5.58946
8430406I07Rik	403.606	-0.0209195	0.215396	-0.0971211	0.92263	0.999996	411.839	360.511	430.064	370.115	353.881	495.226
8430410A17Rik	391.031	0.127468	0.214381	0.594585	0.552121	0.999996	468.679	398.065	358.582	362.737	432.817	325.306
8430410K20Rik	598.437	0.0589304	0.207945	0.283395	0.776874	0.999996	734.929	480.682	617.558	608.661	611.088	537.706
8430419L09Rik	896.786	0.1329	0.157621	0.843161	0.399138	0.999996	934.367	953.17	925.75	930.82	802.663	833.947
8430423G03Rik	5.90564	0.643023	1.19757	0.536939	0.59131	0.999996	8.97471	5.46229	7.03102	8.60732	0.88692	4.47157
8430427H17Rik	209.788	-0.288491	0.332848	-0.866734	0.386088	0.999996	216.39	164.552	185.15	352.9	146.342	193.395
8430429K09Rik	77.4565	0.345656	0.441691	0.782574	0.433877	0.999996	70.8005	69.6442	120.699	40.5774	103.77	59.2482
8430431K14Rik	4.84078	-1.87535	1.65391	-1.13389	0.256842	0.999996	0	2.73115	3.51551	8.60732	14.1907	0
9030025P20Rik	156.149	0.140402	0.277607	0.505758	0.613027	0.999996	156.559	160.455	174.604	162.31	171.176	111.789
9030418K01Rik	84.1859	-0.434364	0.48463	-0.896281	0.370103	0.999996	43.8764	89.445	80.8567	170.917	58.5367	61.484
9030425E11Rik	10010.7	0.0236902	0.168373	0.1407	0.888107	0.999996	9456.35	11641.5	9180.16	8352.79	10748.6	10684.8
9030612E09Rik	46.455	0.322543	0.655731	0.491882	0.622803	0.999996	76.7836	56.6713	21.093	71.3178	41.6853	11.1789
9030617O03Rik	354.967	-0.0282574	0.213085	-0.132611	0.894501	0.999996	331.067	337.979	386.706	303.716	415.966	354.372
9030624G23Rik	101.6	0.142422	0.327699	0.434611	0.663845	0.999996	110.688	129.047	79.6848	88.5325	109.978	91.6671
9030624J02Rik	1627.76	0.0939446	0.150297	0.62506	0.531932	0.999996	1647.36	1543.78	1852.67	1553.01	1624.84	1544.93
9030625A04Rik	573.091	0.0325896	0.223985	0.145499	0.884317	0.999996	670.112	607.68	460.532	454.958	571.177	674.088
9130008F23Rik	40.7639	0.206008	0.521621	0.394938	0.692888	0.999996	43.8764	32.091	55.0763	59.0216	31.0422	23.4757
9130011E15Rik	279.168	-0.228365	0.280279	-0.814777	0.4152	0.999996	186.474	281.991	302.334	395.937	258.981	249.29
9130011J15Rik	3437.81	0.0557838	0.147749	0.377559	0.705759	0.999996	3948.87	3383.21	3180.36	3479.82	3335.71	3298.9
9130014G24Rik	4.5993	2.11877	1.54095	1.37498	0.169139	0.999996	0.99719	10.9246	10.5465	0	1.77384	3.35367
9130015L21Rik	7.56589	1.21694	1.11454	1.09187	0.274888	0.999996	11.9663	15.0213	4.68734	1.22962	3.54768	8.94313
9130017N09Rik	24.7823	0.0837395	0.712796	0.11748	0.906479	0.999996	31.9101	14.3385	30.4677	36.8885	28.3815	6.70735
9130019O22Rik	368.494	0.0422961	0.210554	0.20088	0.840792	0.999996	382.921	317.496	421.861	382.411	322.839	383.437
9130023H24Rik	478.46	0.233572	0.178428	1.30906	0.190516	0.999996	540.477	481.365	529.67	463.566	423.061	432.624
9130024F11Rik	101.39	0.463179	0.31597	1.46589	0.142677	0.999996	137.612	122.219	92.575	78.6955	87.8051	89.4313
9130206I24Rik	85.5356	-0.0612473	0.364262	-0.168141	0.866473	0.999996	74.7892	68.9614	107.809	109.436	85.1444	67.0735
9130221F21Rik	3.41512	-0.127259	1.45402	-0.0875223	0.930256	0.999996	0.99719	4.09672	4.68734	2.45923	2.66076	5.58946
9130221H12Rik	453.98	0.089598	0.261905	0.342102	0.732274	0.999996	360.983	638.405	403.112	533.654	422.174	365.55
9130227L01Rik	7.74811	-0.517096	1.17655	-0.439501	0.660299	0.999996	13.9607	0.682787	4.68734	7.3777	14.1907	5.58946
9130401M01Rik	768.691	-0.355827	0.23109	-1.53978	0.123615	0.999996	916.417	606.315	500.374	838.599	906.433	844.008
9130404H23Rik	30.7334	-0.197835	0.716181	-0.276237	0.782366	0.999996	33.9045	45.7467	5.85918	36.8885	45.2329	16.7684
9230110C19Rik	120.775	0.320112	0.426681	0.750237	0.453112	0.999996	191.46	68.9614	142.964	61.4809	135.699	124.086
9230114K14Rik	17.4826	-0.762575	0.802571	-0.950165	0.342028	0.999996	10.9691	12.9729	15.2339	6.14809	41.6853	17.8863
9230116N13Rik	17.6872	0.609608	0.852789	0.71484	0.474708	0.999996	29.9157	20.4836	14.062	6.14809	31.0422	4.47157
9330020H09Rik	51.2489	0.0297302	0.429148	0.0692773	0.944769	0.999996	37.8932	60.768	56.2481	61.4809	40.7983	50.3051
9330117O12	126.567	-0.313633	0.332186	-0.94415	0.345093	0.999996	96.7274	105.149	137.105	105.747	122.395	192.277
9330133O14Rik	216.475	-0.0895378	0.236509	-0.378581	0.704999	0.999996	195.449	208.933	224.992	250.842	229.712	188.924
9330151L19Rik	100.734	-0.0159113	0.460767	-0.0345321	0.972453	0.999996	68.8061	102.418	130.074	40.5774	155.211	107.318
9330159F19Rik	6.18719	0.206799	1.08488	0.190619	0.848824	0.999996	7.97752	6.14508	5.85918	4.91847	8.8692	3.35367
9330159M07Rik	54.0916	0.299261	0.419256	0.713791	0.475357	0.999996	77.7808	51.209	50.3889	43.0366	58.5367	43.5978
9330175E14Rik	15.0938	-0.924146	0.731174	-1.26392	0.206258	0.999996	8.97471	11.6074	10.5465	28.2812	17.7384	13.4147
9330179D12Rik	34.9922	0.841422	0.686888	1.22498	0.220584	0.999996	42.8792	74.4237	17.5775	11.0666	46.1199	17.8863
9330182L06Rik	3.28188	0.0420087	2.1714	0.0193464	0.984565	0.999996	0	7.51065	2.34367	9.83694	0	0
9430008C03Rik	52.3686	-0.208825	0.480479	-0.434619	0.663839	0.999996	26.9241	53.2574	65.6228	44.2662	47.0068	77.1345
9430015G10Rik	155.819	-0.29	0.303679	-0.954956	0.3396	0.999996	151.573	175.476	92.575	158.621	180.045	176.627
9430016H08Rik	463.871	-0.138423	0.198845	-0.696134	0.486345	0.999996	472.668	447.908	404.283	513.98	537.474	406.912
9430020K01Rik	309.411	-0.198016	0.212147	-0.933387	0.35062	0.999996	280.21	292.233	291.787	383.641	320.178	288.416
9430023L20Rik	920.896	0.170475	0.170765	0.998301	0.318133	0.999996	1003.17	1049.44	873.018	801.711	964.082	833.947
9430037G07Rik	36.8178	-0.728363	0.578417	-1.25924	0.207945	0.999996	12.9635	22.532	48.0453	59.0216	42.5722	35.7725
9430060I03Rik	38.1724	0.0753499	0.514569	0.146433	0.88358	0.999996	37.8932	54.6229	24.6086	27.0516	39.0245	45.8335
9430069I07Rik	16.0177	-0.250197	0.73592	-0.339979	0.733872	0.999996	8.97471	12.9729	22.2649	12.2962	23.9469	15.6505
9430076G02Rik	15.3792	0.299572	0.824106	0.363511	0.716223	0.999996	21.9382	18.4352	10.5465	3.68885	14.1907	23.4757
9430083A17Rik	10.433	-0.322197	1.02375	-0.314721	0.752973	0.999996	1.99438	16.3869	9.37469	3.68885	17.7384	13.4147
9430091E24Rik	52.6695	0.382026	0.419951	0.909693	0.362984	0.999996	49.8595	57.3541	71.482	47.9551	34.5899	54.7767
9530008L14Rik	11.4156	-0.144823	0.830294	-0.174424	0.861532	0.999996	10.9691	8.87623	12.8902	6.14809	15.0776	14.5326
9530026P05Rik	118.995	-0.0606406	0.362966	-0.16707	0.867315	0.999996	83.7639	150.896	114.84	78.6955	156.098	129.675
9530027J09Rik	23.5388	-0.648597	0.696595	-0.931096	0.351804	0.999996	29.9157	19.118	5.85918	18.4443	35.4768	32.4188
9530052E02Rik	106.2	0.18153	0.325364	0.55793	0.576892	0.999996	92.7387	113.343	132.417	95.9102	79.8228	122.968
9530068E07Rik	10807.6	-0.0304392	0.143401	-0.212266	0.831899	0.999996	11884.5	9734.49	10463.3	10294.4	11549.5	10919.6
9530077C05Rik	20.0669	1.18546	0.692589	1.71163	0.0869642	0.999996	34.9016	13.6557	35.1551	15.985	10.643	10.061
9530082P21Rik	441.049	-0.122193	0.20263	-0.603033	0.546487	0.999996	389.901	413.086	465.219	382.411	499.336	496.344
9530091C08Rik	162.063	-0.0858473	0.333044	-0.257765	0.796588	0.999996	123.652	168.648	179.291	222.561	176.497	101.728
9630033F20Rik	90.9684	-0.0155459	0.44737	-0.0347495	0.972279	0.999996	53.8482	154.31	62.1073	116.814	81.5967	77.1345
9830001H06Rik	539.378	0.116323	0.245656	0.47352	0.635842	0.999996	587.345	609.046	485.14	675.06	360.977	518.702
9830147E19Rik	28.3823	1.15159	0.839246	1.37218	0.170008	0.999996	6.98033	48.4778	62.1073	3.68885	17.7384	31.301
9930012K11Rik	403.468	0.341226	0.187157	1.82321	0.0682716	0.999996	472.668	471.806	407.799	357.819	352.994	357.725
9930014A18Rik	13.956	1.20736	0.825618	1.46237	0.143641	0.999996	28.9185	19.118	10.5465	7.3777	13.3038	4.47157
9930021D14Rik	203.454	0.296073	0.234731	1.26133	0.20719	0.999996	244.312	226.685	201.556	170.917	178.271	198.985
9930021J03Rik	512.414	-0.221593	0.187223	-1.18358	0.236581	0.999996	470.674	531.208	416.002	553.328	519.735	583.539
9930104L06Rik	243.336	0.2779	0.287894	0.965284	0.334402	0.999996	189.466	268.335	343.348	174.606	269.624	214.635
9930111J21Rik1	4.39334	-1.22968	1.51853	-0.809781	0.418066	0.999996	3.98876	2.73115	1.17184	0	10.643	7.82524
9930111J21Rik2	6.67625	-0.176083	1.15479	-0.15248	0.878808	0.999996	1.99438	4.09672	12.8902	3.68885	6.20844	11.1789
A030009H04Rik	36.1753	-0.96819	0.545815	-1.77384	0.0760889	0.999996	29.9157	24.5803	18.7494	33.1997	34.5899	76.0166
A130010J15Rik	326.32	-0.0611155	0.233228	-0.262042	0.793289	0.999996	283.202	284.039	392.565	286.501	379.602	332.014
A130022J15Rik	527.453	0.0716938	0.20641	0.347337	0.728338	0.999996	520.533	449.956	652.713	538.572	540.135	462.807
A130040M12Rik	3494.44	-0.1591	0.16778	-0.948264	0.342995	0.999996	2897.83	3616.04	3392.47	3185.94	4215.53	3658.86
A130049A11Rik	76.206	0.221082	0.492283	0.449095	0.653363	0.999996	32.9073	94.9073	118.355	88.5325	78.9359	43.5978
A130077B15Rik	435.703	-0.0361695	0.260938	-0.138613	0.889756	0.999996	350.014	553.74	385.534	557.017	438.139	329.778
A230020J21Rik	33.2084	-0.115636	0.503751	-0.229551	0.818441	0.999996	24.9297	37.5533	32.8114	41.807	27.4945	34.6546
A230046K03Rik	1433.49	-0.0471774	0.160725	-0.293528	0.769118	0.999996	1372.13	1408.59	1450.73	1332.91	1672.73	1363.83
A230050P20Rik	380.069	0.0320959	0.242658	0.132268	0.894772	0.999996	379.929	400.796	372.644	259.449	415.966	451.628
A230051G13Rik	229.002	0.186091	0.345624	0.53842	0.590287	0.999996	212.401	313.399	203.899	334.456	136.586	173.273
A230056P14Rik	247.602	-0.158278	0.266088	-0.594833	0.551955	0.999996	272.233	231.465	198.04	217.642	225.278	340.957
A230072C01Rik	146.927	0.0469665	0.256185	0.18333	0.854539	0.999996	149.578	148.165	149.995	158.621	136.586	138.619
A230073K19Rik	485.361	-0.0683025	0.184345	-0.370516	0.710998	0.999996	515.547	418.548	488.656	482.01	514.414	492.99
A2ld1	554.369	0.135395	0.192838	0.702116	0.482607	0.999996	674.1	562.616	503.889	574.231	520.622	490.754
A2m	3022.34	-0.216831	0.595712	-0.363986	0.715869	0.999996	1177.68	4593.11	2615.54	4547.13	2579.16	2621.46
A330009N23Rik	22.1166	0.379124	0.765686	0.495143	0.620499	0.999996	43.8764	8.87623	22.2649	33.1997	13.3038	11.1789
A330021E22Rik	9.72114	0.402307	1.14063	0.352707	0.724308	0.999996	11.9663	6.14508	15.2339	0	7.09536	17.8863
A330023F24Rik	7.2567	-0.415036	1.3086	-0.31716	0.751122	0.999996	1.99438	6.14508	10.5465	15.985	8.8692	0
A330032B11Rik	44.6482	-0.306792	0.447557	-0.685481	0.49304	0.999996	31.9101	44.3811	43.3579	59.0216	52.3283	36.8904
A330035P11Rik	18.6792	-0.446959	0.745789	-0.59931	0.548966	0.999996	10.9691	23.2147	12.8902	35.6589	20.3992	8.94313
A330040F15Rik	3.31126	-2.01221	2.20257	-0.913573	0.360941	0.999996	0	2.73115	1.17184	0	15.9646	0
A330041J22Rik	11.4447	0.677842	0.833659	0.813093	0.416165	0.999996	8.97471	15.7041	17.5775	11.0666	9.75612	5.58946
A330048O09Rik	34.9614	0.549486	0.527344	1.04199	0.297417	0.999996	55.8426	39.6016	29.2959	18.4443	31.9291	34.6546
A330050B17Rik	35.6426	0.122685	0.599252	0.20473	0.837783	0.999996	54.8454	42.3328	14.062	40.5774	40.7983	21.2399
A330069E16Rik	20.1124	-0.184082	0.736674	-0.249882	0.802679	0.999996	34.9016	12.2902	9.37469	13.5258	20.3992	30.1831
A430005L14Rik	685.689	-0.114039	0.195287	-0.583957	0.559249	0.999996	719.971	718.974	535.529	673.83	664.303	801.528
A430033K04Rik	228.857	0.153032	0.275895	0.554674	0.579118	0.999996	195.449	264.238	262.491	222.561	157.872	270.53
A430035B10Rik	41.0353	-0.169951	0.507944	-0.334586	0.737938	0.999996	39.8876	45.0639	30.4677	65.1697	39.9114	25.7115
A430071A18Rik	4.02352	-0.0866049	1.40044	-0.0618412	0.950689	0.999996	0.99719	4.77951	5.85918	7.3777	1.77384	3.35367
A430078G23Rik	68.2484	-0.164244	0.364355	-0.450781	0.652148	0.999996	77.7808	56.6713	58.5918	79.9251	63.8583	72.6629
A430090L17Rik	10.2241	-0.132928	0.890144	-0.149333	0.881291	0.999996	8.97471	12.9729	7.03102	17.2146	6.20844	8.94313
A430105I19Rik	16.3368	1.18309	0.833824	1.41887	0.155937	0.999996	20.941	24.5803	22.2649	20.9035	7.09536	2.23578
A430107O13Rik	2245.75	0.297286	0.192048	1.54798	0.121627	0.999996	2130	2119.37	3181.53	1957.55	2124.17	1961.9
A430107P09Rik	6.03558	-0.263263	1.16841	-0.225317	0.821733	0.999996	1.99438	9.55901	4.68734	11.0666	4.4346	4.47157
A430110N23Rik	18.0101	1.69028	1.17253	1.44156	0.149426	0.999996	0	36.8705	45.7016	11.0666	13.3038	1.11789
A4galt	1123.85	0.193366	0.19122	1.01122	0.311911	0.999996	1107.88	1267.93	1222.22	1003.37	1284.26	857.423
A530032D15Rik	23.8118	0.110533	0.599728	0.184306	0.853773	0.999996	20.941	25.2631	28.1241	13.5258	24.8338	30.1831
A530054K11Rik	203.911	0.0400002	0.300306	0.133198	0.894037	0.999996	181.489	171.379	268.35	227.479	235.034	139.736
A630001G21Rik	8.76462	-0.0568044	1.03513	-0.0548765	0.956237	0.999996	10.9691	2.04836	12.8902	11.0666	4.4346	11.1789
A630007B06Rik	272.325	-0.0832388	0.222299	-0.374445	0.708073	0.999996	245.309	277.894	269.522	284.042	238.582	318.599
A630019I02Rik	4.82611	-0.150153	1.66569	-0.0901448	0.928172	0.999996	0.99719	0	12.8902	1.22962	2.66076	11.1789
A630033H20Rik	235.408	0.428128	0.253332	1.68999	0.0910297	0.999996	206.418	270.383	333.973	199.198	210.2	192.277
A630055G03Rik	39.6798	0.116026	0.521268	0.222584	0.823859	0.999996	29.9157	40.9672	52.7326	59.0216	27.4945	27.9473
A630066F11Rik	74.2458	0.0611414	0.376084	0.162574	0.870854	0.999996	75.7864	83.9828	67.9665	52.8736	96.6743	68.1914
A630072M18Rik	469.63	0.272923	0.182131	1.4985	0.134003	0.999996	530.505	503.214	507.405	458.647	383.15	434.86
A630089N07Rik	187.212	-0.0673795	0.326253	-0.206525	0.836381	0.999996	138.609	239.658	169.916	200.428	248.338	126.322
A730008H23Rik	7.47008	-0.36377	1.00579	-0.361677	0.717594	0.999996	6.98033	6.82787	5.85918	7.3777	13.3038	4.47157
A730011L01Rik	366.008	0.0293922	0.242811	0.12105	0.903652	0.999996	302.149	434.252	371.472	457.418	316.631	314.127
A730017L22Rik	116.804	-0.164937	0.332011	-0.496781	0.619343	0.999996	74.7892	111.977	144.136	106.977	132.151	130.793
A730020E08Rik	6.33966	0.949537	1.13873	0.833856	0.404362	0.999996	3.98876	15.0213	5.85918	4.91847	2.66076	5.58946
A730085A09Rik	5.95737	2.74004	1.51096	1.81344	0.0697634	0.999996	3.98876	19.118	8.20285	0	4.4346	0
A730090H04Rik	61.4331	0.474413	0.445829	1.06411	0.287277	0.999996	71.7977	93.5418	48.0453	70.0882	33.703	51.423
A730090N16Rik	6.64771	0.480665	1.07703	0.446285	0.655391	0.999996	9.9719	6.14508	7.03102	9.83694	3.54768	3.35367
A730098P11Rik	1501.72	0.0214171	0.149454	0.143303	0.886051	0.999996	1421	1617.52	1499.95	1394.39	1567.19	1510.27
A830007P12Rik	911.581	-0.0937105	0.161938	-0.57868	0.562805	0.999996	838.637	880.112	928.094	923.443	1030.6	868.602
A830009L08Rik	4.33728	3.63124	1.78867	2.03013	0.0423429	0.999996	1.99438	8.19344	14.062	0	1.77384	0
A830010M20Rik	11.2863	-0.329855	1.00962	-0.326711	0.743887	0.999996	8.97471	18.4352	2.34367	15.985	18.6253	3.35367
A830018L16Rik	35.6006	-0.1231	0.490648	-0.250893	0.801897	0.999996	28.9185	41.65	31.6396	31.9701	47.0068	32.4188
A830052D11Rik	10.1135	-0.587194	0.863542	-0.679982	0.496516	0.999996	9.9719	6.14508	8.20285	9.83694	9.75612	16.7684
A830080D01Rik	350.933	-0.00625449	0.284201	-0.0220073	0.982442	0.999996	337.05	266.287	448.813	234.857	393.793	424.799
A830082N09Rik	21.6297	0.852663	0.656717	1.29837	0.19416	0.999996	22.9354	28.677	31.6396	25.822	10.643	10.061
A830093I24Rik	6.74555	0.169737	1.20155	0.141265	0.887661	0.999996	2.99157	13.6557	4.68734	7.3777	10.643	1.11789
A930001C03Rik	46.1445	0.167791	0.500165	0.335472	0.737269	0.999996	28.9185	68.2787	49.2171	28.2812	54.1021	48.0693
A930001N09Rik	886.042	0.0708463	0.177675	0.398741	0.690084	0.999996	844.62	814.564	1065.2	922.213	834.592	835.065
A930004D18Rik	258.335	-0.134888	0.262203	-0.514442	0.606943	0.999996	234.34	294.281	208.587	346.752	227.939	238.111
A930005H10Rik	192.229	0.0204783	0.263716	0.077653	0.938104	0.999996	177.5	217.809	185.15	212.724	213.748	146.444
A930007I19Rik	9.03601	0.481939	1.02942	0.468166	0.639666	0.999996	12.9635	15.0213	3.51551	9.83694	10.643	2.23578
A930012L18Rik	13.3717	0.520286	0.931281	0.558677	0.576382	0.999996	4.98595	19.8008	22.2649	15.985	2.66076	14.5326
A930013F10Rik	10.2812	0.99158	0.985516	1.00615	0.314342	0.999996	5.98314	24.5803	10.5465	3.68885	12.4169	4.47157
A930015D03Rik	26.7066	-0.658237	0.609762	-1.0795	0.280365	0.999996	21.9382	10.2418	30.4677	30.7404	26.6076	40.2441
A930038C07Rik	592.814	-0.110414	0.215155	-0.513182	0.607824	0.999996	695.041	555.788	459.36	534.884	607.54	704.272
AA388235	23.6889	-0.94158	0.687827	-1.36892	0.171024	0.999996	18.9466	24.5803	4.68734	23.3627	38.1376	32.4188
AA415398	63.8711	0.0400358	0.44713	0.0895394	0.928653	0.999996	43.8764	86.0311	64.451	39.3478	86.9182	62.6019
AA474331	22.5439	-0.179958	0.667891	-0.269442	0.787589	0.999996	9.9719	35.5049	17.5775	24.5923	27.4945	20.122
AA536875	6.05175	-0.306294	1.15445	-0.265316	0.790766	0.999996	9.9719	2.73115	3.51551	9.83694	3.54768	6.70735
AA543186	21.8722	-0.340494	0.795976	-0.427769	0.668819	0.999996	18.9466	20.4836	18.7494	3.68885	47.0068	22.3578
AA960436	865.776	-0.0466038	0.168323	-0.276872	0.781879	0.999996	961.291	837.779	755.834	901.31	870.956	867.484
AA986860	46.9999	0.32932	0.475827	0.692101	0.488874	0.999996	34.9016	58.0369	64.451	35.6589	57.6498	31.301
AA987161	222.492	0.328818	0.233053	1.41092	0.158269	0.999996	265.252	218.492	260.148	177.065	196.009	217.989
Aaas	481.948	-0.198145	0.180507	-1.09772	0.272329	0.999996	448.735	470.44	426.548	563.165	488.693	494.108
Aacs	444.277	-0.117336	0.200525	-0.585145	0.55845	0.999996	446.741	424.693	407.799	378.722	504.658	503.051
Aagab	544.381	0.0280777	0.207373	0.135397	0.892298	0.999996	634.213	499.8	515.608	447.581	537.474	631.609
Aak1	474.317	0.199884	0.277213	0.721047	0.47088	0.999996	394.887	471.123	655.056	613.579	342.351	368.904
Aamp	3896.66	0.103031	0.137984	0.746689	0.455251	0.999996	4114.41	3851.6	4142.44	3456.45	3851.01	3964.04
Aars	1798.11	0.010973	0.147259	0.0745152	0.9406	0.999996	1765.03	1669.41	1981.57	1832.13	1776.5	1764.03
Aars2	181.219	0.170241	0.289407	0.588241	0.55637	0.999996	202.43	236.244	135.933	157.391	155.211	200.103
Aarsd1	581.55	-0.107666	0.18719	-0.575167	0.565179	0.999996	529.508	614.508	535.529	520.128	666.964	622.665
Aasdh	127.449	-0.112384	0.289092	-0.388748	0.697462	0.999996	126.643	119.488	121.871	103.288	152.55	140.854
Aasdhppt	712.43	-0.10933	0.196572	-0.556185	0.578084	0.999996	826.67	615.191	615.214	735.311	820.401	661.792
Aatf	453.472	-0.122201	0.211427	-0.577985	0.563274	0.999996	398.876	518.918	384.362	424.218	538.361	456.1
AB124611	40.6503	-0.79349	0.475566	-1.66852	0.0952134	0.999996	32.9073	23.8975	32.8114	36.8885	51.4414	65.9556
Abat	1583.42	0.0973713	0.3055	0.318727	0.749933	0.999996	996.193	1332.12	2583.9	1455.87	1969.85	1162.61
Abca1	1358.67	0.0844378	0.24893	0.339204	0.734456	0.999996	952.316	1596.36	1646.43	1568.99	1433.26	954.679
Abca2	82.0338	0.944844	0.590244	1.60077	0.109428	0.999996	25.9269	168.648	128.902	89.7621	48.7806	30.1831
Abca3	58.0938	0.0708472	0.652092	0.108646	0.913483	0.999996	19.9438	96.9557	60.9355	111.895	23.0599	35.7725
Abca4	4.40158	2.79206	1.73695	1.60745	0.107955	0.999996	9.9719	1.36557	11.7184	0	0	3.35367
Abca5	200.11	0.276669	0.437181	0.632849	0.526832	0.999996	87.7527	178.207	392.565	194.28	218.182	129.675
Abca6	38.6441	-0.424516	0.534972	-0.793528	0.42747	0.999996	24.9297	49.1606	24.6086	36.8885	63.8583	32.4188
Abca7	354.705	0.224641	0.403651	0.556524	0.577853	0.999996	197.444	429.473	519.123	542.261	169.402	270.53
Abca8a	2141.28	0.160841	0.248135	0.6482	0.516856	0.999996	1511.74	1967.79	3303.41	1962.47	2057.66	2044.62
Abca8b	272.921	0.494067	0.298369	1.65589	0.0977435	0.999996	280.21	223.271	454.672	261.909	182.706	234.757
Abca9	1712.78	0.508274	0.248972	2.04149	0.0412018	0.999996	1547.64	1854.45	2631.94	1908.37	1218.63	1115.66
Abcb10	441.703	0.194888	0.251836	0.773868	0.439009	0.999996	511.558	314.765	589.433	416.84	376.054	441.567
Abcb1a	241.626	0.380567	0.316514	1.20237	0.22922	0.999996	373.946	223.271	222.649	170.917	164.967	294.005
Abcb1b	80.9251	-0.177575	0.37325	-0.475754	0.63425	0.999996	66.8117	55.3057	106.637	86.0732	91.3528	79.3703
Abcb4	13.2743	-0.0636764	1.00531	-0.06334	0.949496	0.999996	15.955	2.04836	21.093	13.5258	3.54768	23.4757
Abcb6	575.353	0.0690045	0.213123	0.323777	0.746107	0.999996	669.114	441.08	658.572	544.721	542.795	595.836
Abcb8	425.079	0.340179	0.191794	1.77367	0.0761183	0.999996	461.699	527.111	434.751	402.085	350.334	374.494
Abcb9	271.943	0.152018	0.222906	0.681984	0.495249	0.999996	306.137	269.701	282.412	296.338	219.956	257.115
Abcc1	800.705	0.114947	0.165548	0.694339	0.487469	0.999996	779.802	850.069	867.159	807.859	694.459	804.882
Abcc10	152.462	0.271083	0.318872	0.850131	0.395252	0.999996	119.663	193.911	186.322	115.584	117.073	182.216
Abcc4	148.894	0.00737807	0.414424	0.0178032	0.985796	0.999996	220.379	143.385	83.2004	223.79	89.579	133.029
Abcc5	766.7	-0.114839	0.283753	-0.404715	0.685687	0.999996	520.533	752.431	935.125	1150.92	603.993	637.198
Abcd1	1495.65	0.0861505	0.157947	0.545438	0.585452	0.999996	1459.89	1584.06	1577.29	1277.57	1473.17	1601.94
Abcd2	899.2	0.148025	0.237937	0.622119	0.533864	0.999996	675.097	950.439	1211.68	764.822	1038.58	754.577
Abcd3	1183.24	-0.00420559	0.157926	-0.0266301	0.978755	0.999996	1285.38	1134.79	1123.79	1281.26	1101.56	1172.67
Abcd4	346.936	0.0663588	0.201881	0.328703	0.74238	0.999996	377.935	380.312	305.849	327.078	345.012	345.428
Abce1	1839.62	-0.115424	0.194125	-0.594585	0.552121	0.999996	2066.18	1347.82	1885.48	2138.3	1835.93	1764.03
Abcf1	868.727	-0.237159	0.15938	-1.48801	0.136748	0.999996	831.656	753.796	807.395	911.147	896.677	1011.69
Abcf2	1278.45	-0.0368415	0.145405	-0.253371	0.799981	0.999996	1298.34	1201.7	1286.68	1341.51	1269.18	1273.28
Abcf3	1003.85	0.197742	0.172744	1.14471	0.252329	0.999996	1009.16	1083.58	1126.13	799.251	1058.1	946.854
Abcg1	72.6967	-0.23106	0.470276	-0.491329	0.623194	0.999996	29.9157	95.5901	74.9975	73.777	103.77	58.1303
Abcg2	3349.51	0.20739	0.169851	1.22101	0.222082	0.999996	3709.55	3048.64	4013.54	3139.21	3465.2	2720.95
Abcg4	53.8259	-0.0998621	0.466755	-0.21395	0.830586	0.999996	31.9101	67.5959	56.2481	36.8885	57.6498	72.6629
Abhd1	112.324	0.19865	0.290745	0.683245	0.494452	0.999996	114.677	137.24	107.809	104.517	109.091	100.61
Abhd10	220.407	0.0333459	0.234369	0.142279	0.886859	0.999996	226.362	238.293	203.899	232.398	235.921	185.57
Abhd11	523.573	-0.139366	0.200809	-0.694021	0.487669	0.999996	582.359	507.31	404.283	584.068	526.831	536.588
Abhd12	3941.13	0.226054	0.156269	1.44657	0.148018	0.999996	4851.33	4154.76	3741.67	3376.53	3678.06	3844.43
Abhd13	913.743	0.272918	0.190328	1.43393	0.151591	0.999996	959.297	863.725	1177.7	932.05	823.062	726.629
Abhd14a	580.133	-0.0567818	0.187328	-0.303115	0.761802	0.999996	524.522	645.916	534.357	652.927	585.367	537.706
Abhd14b	651.242	0.0613347	0.181301	0.338303	0.735135	0.999996	696.038	723.071	575.371	584.068	649.226	679.678
Abhd15	2822.88	0.400918	0.262426	1.52774	0.126577	0.999996	2089.11	3918.51	3630.35	2624	3020.85	1654.48
Abhd16a	3474.13	0.163642	0.15026	1.08906	0.276129	0.999996	3879.07	3467.19	3667.85	2871.16	3410.21	3549.3
Abhd2	157.929	0.309228	0.398818	0.775362	0.438126	0.999996	221.376	152.261	149.995	242.235	87.8051	93.9029
Abhd3	119.751	-0.0913612	0.2979	-0.306685	0.759083	0.999996	101.713	118.805	127.73	98.3694	132.151	139.736
Abhd4	2642.38	0.243344	0.136795	1.7789	0.0752569	0.999996	2921.77	2780.99	2892.09	2272.33	2446.13	2540.97
Abhd5	1961.95	-0.211792	0.153545	-1.37935	0.167785	0.999996	2013.33	1756.81	1685.1	1972.31	2274.95	2069.22
Abhd6	114.799	0.32636	0.310882	1.04979	0.293815	0.999996	122.654	107.88	153.511	102.058	118.847	83.8419
Abhd8	751.951	0.299237	0.195868	1.52774	0.126576	0.999996	909.437	881.478	697.242	598.824	633.261	791.467
Abi1	1142.9	0.109637	0.182867	0.599544	0.54881	0.999996	1174.69	1094.51	1291.36	1101.74	1285.15	909.964
Abi2	1252.85	0.119865	0.167007	0.717723	0.472928	0.999996	1340.22	1142.3	1433.16	1305.85	1195.57	1100.01
Abi3	232.256	0.372858	0.33753	1.10467	0.269304	0.999996	134.621	355.049	296.474	185.672	235.034	186.688
Abi3bp	3743.21	0.102395	0.200805	0.509923	0.610105	0.999996	3074.34	4369.15	4184.63	2833.04	3753.45	4244.63
Abl1	1104.6	0.531826	0.283653	1.87491	0.0608044	0.999996	787.78	1508.28	1620.65	1186.58	645.678	878.663
Abl2	196.269	0.103766	0.252395	0.411125	0.680981	0.999996	207.415	209.615	192.181	194.28	151.663	222.46
Ablim1	26.5778	-1.50613	0.95343	-1.5797	0.114176	0.999996	10.9691	30.0426	0	33.1997	71.8406	13.4147
Ablim2	236.193	0.514221	0.261505	1.96639	0.0492535	0.999996	321.095	217.126	296.474	154.932	208.426	219.107
Abr	512.368	0.424601	0.252664	1.6805	0.0928609	0.999996	421.811	596.755	742.944	431.596	351.22	529.88
Abt1	430.081	-0.0763673	0.212801	-0.358867	0.719695	0.999996	490.617	356.415	410.143	378.722	459.425	485.165
Abtb1	573.563	0.273623	0.21094	1.29716	0.194576	0.999996	498.595	667.083	718.335	441.433	556.986	558.946
Abtb2	240.467	0.106424	0.255227	0.41698	0.676693	0.999996	188.469	278.577	281.241	199.198	257.207	238.111
Acaa1a	2124.54	-0.0321155	0.170136	-0.188763	0.850278	0.999996	2337.41	2107.76	1857.36	1859.18	2155.22	2430.3
Acaa1b	330.357	0.0343404	0.22188	0.15477	0.877002	0.999996	365.969	324.324	312.88	265.597	329.934	383.437
Acaa2	1273.79	0.067625	0.162887	0.415166	0.678021	0.999996	1429.97	1333.48	1147.23	1233.31	1333.93	1164.84
Acaca	400.828	0.292568	0.341656	0.856321	0.39182	0.999996	240.323	597.438	485.14	521.358	298.005	262.704
Acacb	12.1634	0.934755	1.04673	0.893027	0.371843	0.999996	8.97471	8.87623	30.4677	4.91847	18.6253	1.11789
Acad10	204.44	0.474039	0.243369	1.94782	0.0514368	0.999996	261.264	225.32	227.336	143.865	193.349	175.509
Acad11	1678.42	0.0747323	0.169124	0.44188	0.658576	0.999996	1450.91	1729.5	1986.26	1589.9	1732.16	1581.82
Acad12	198.613	0.208188	0.24415	0.852706	0.393822	0.999996	229.354	179.573	230.852	177.065	200.444	174.391
Acad8	772.944	-0.0586378	0.180208	-0.32539	0.744886	0.999996	726.951	682.787	863.643	702.112	820.401	841.772
Acad9	778.15	0.207779	0.160677	1.29314	0.195962	0.999996	871.544	802.274	828.488	768.511	718.406	679.678
Acadl	2669.69	0.00329068	0.153281	0.0214683	0.982872	0.999996	2811.08	2369.95	2839.36	2507.19	2908.21	2582.33
Acadm	1943.37	-0.11927	0.154701	-0.77097	0.440725	0.999996	1691.23	1826.45	2072.98	1932.96	2179.16	1957.43
Acads	791.776	0.241337	0.223652	1.07907	0.280555	0.999996	723.96	1069.24	778.099	848.436	568.516	762.402
Acadsb	2483.55	-0.185505	0.154009	-1.20451	0.228392	0.999996	2339.41	2088.64	2546.4	2397.75	2785.82	2743.31
Acadvl	2684.85	0.142929	0.141693	1.00872	0.313107	0.999996	2831.02	2793.28	2829.98	2311.68	2727.28	2615.87
Acap2	1224.61	0.100117	0.190189	0.526407	0.598605	0.999996	1021.12	1318.46	1462.45	1187.81	1317.08	1040.76
Acap3	741.24	0.0560504	0.184036	0.304563	0.760699	0.999996	707.008	785.205	773.412	829.992	608.427	743.398
Acat1	2378.82	-0.166916	0.14124	-1.18179	0.23729	0.999996	2206.78	2286.65	2231.18	2434.64	2737.04	2376.64
Acat2	704.025	0.00718672	0.206967	0.0347241	0.9723	0.999996	689.058	687.566	741.772	523.817	763.638	818.296
Acat3	793.192	-0.189594	0.185312	-1.02311	0.306256	0.999996	859.578	689.614	673.806	956.642	785.811	793.703
Acbd3	1487.84	-0.139753	0.159256	-0.877537	0.380195	0.999996	1379.11	1435.22	1431.98	1737.45	1356.99	1586.29
Acbd4	417.242	0.0490674	0.241381	0.203278	0.838918	0.999996	353.005	417.183	503.889	303.716	450.556	475.104
Acbd5	466.588	-0.260637	0.18861	-1.38188	0.167008	0.999996	368.96	432.887	472.25	502.914	525.057	497.462
Acbd6	630.23	0.0311615	0.169435	0.183914	0.854081	0.999996	622.246	639.088	650.369	563.165	653.66	652.849
Accn2	26.528	-0.293906	0.750568	-0.391579	0.69537	0.999996	12.9635	33.4565	24.6086	55.3328	7.09536	25.7115
Accn3	8.38588	-0.209979	1.2504	-0.167929	0.866639	0.999996	4.98595	3.41393	15.2339	0	17.7384	8.94313
Accs	164.88	-0.0306335	0.253694	-0.12075	0.903889	0.999996	159.55	161.138	168.744	151.243	155.211	193.395
Acd	485.244	0.0362244	0.180294	0.200918	0.840762	0.999996	523.525	447.225	503.889	467.255	466.52	503.051
Acer1	5.35147	0.0214985	1.14672	0.0187479	0.985042	0.999996	2.99157	6.14508	7.03102	6.14809	5.32152	4.47157
Acer2	111.527	-0.139709	0.336123	-0.415649	0.677667	0.999996	78.778	100.37	139.448	142.636	107.317	100.61
Acer3	830.695	-0.175784	0.166405	-1.05636	0.290804	0.999996	858.58	742.189	739.428	952.954	847.009	844.008
Ache	49.0382	-0.297617	0.547005	-0.544085	0.586383	0.999996	32.9073	59.4024	39.8424	28.2812	95.7874	38.0083
Acin1	569.747	-0.0230513	0.239208	-0.0963651	0.923231	0.999996	422.808	716.926	554.278	693.504	531.265	499.697
Acly	1281.88	0.149061	0.171036	0.871519	0.383471	0.999996	1215.57	1232.43	1597.21	1249.29	1176.06	1220.74
Acmsd	29.3192	-0.42392	0.560338	-0.756543	0.449324	0.999996	17.9494	33.4565	23.4367	40.5774	38.1376	22.3578
Acn9	88.9492	0.291834	0.367556	0.793985	0.427204	0.999996	89.7471	118.805	84.3722	78.6955	55.876	106.2
Acnat1	8.7109	-0.332073	0.921972	-0.360176	0.718715	0.999996	9.9719	6.14508	7.03102	8.60732	7.09536	13.4147
Aco1	2150.09	-0.0720824	0.158537	-0.454671	0.649346	0.999996	1849.79	2321.47	2116.34	2406.36	2069.19	2137.41
Aco2	3175.22	0.101651	0.146619	0.693301	0.488121	0.999996	3413.38	3138.77	3309.26	2861.32	2901.12	3427.45
Acot10	9.38056	-0.741217	0.893348	-0.829708	0.406704	0.999996	4.98595	6.82787	9.37469	8.60732	14.1907	12.2968
Acot11	173.708	-0.223124	0.384702	-0.579992	0.56192	0.999996	70.8005	172.745	237.883	161.08	216.409	183.334
Acot12	10.2256	-0.836664	0.995378	-0.840549	0.400601	0.999996	7.97752	2.73115	11.7184	4.91847	23.9469	10.061
Acot13	312.801	-0.0948946	0.235672	-0.402655	0.687202	0.999996	323.089	353.683	229.68	334.456	344.125	291.77
Acot2	268.849	0.635496	0.339569	1.87148	0.0612787	0.999996	359.986	425.376	194.525	303.716	168.515	160.976
Acot6	66.6396	0.538996	0.429391	1.25526	0.209385	0.999996	77.7808	70.327	89.0595	30.7404	51.4414	80.4882
Acot7	400.826	0.00766126	0.228879	0.0334729	0.973297	0.999996	337.05	512.09	355.066	376.263	384.037	440.449
Acot8	266.526	0.154122	0.211615	0.728313	0.466422	0.999996	294.171	292.233	255.46	239.775	249.225	268.294
Acot9	1230.56	-0.0501574	0.173809	-0.288578	0.772905	0.999996	1342.22	1095.19	1191.76	1093.13	1419.07	1241.98
Acox3	724.151	0.182744	0.181016	1.00955	0.312712	0.999996	865.561	690.98	754.662	607.431	743.239	683.032
Acp1	1280.33	-0.0879346	0.155976	-0.56377	0.57291	0.999996	1287.37	1137.52	1300.74	1212.4	1401.33	1342.59
Acp2	2585.25	0.00263882	0.148031	0.0178261	0.985778	0.999996	2498.96	2558.4	2706.94	2325.21	2845.24	2576.74
Acp5	62.6627	-0.214637	0.492469	-0.435838	0.662955	0.999996	38.8904	60.0852	74.9975	49.1847	39.9114	112.907
Acp6	223.592	0.0759271	0.258934	0.29323	0.769346	0.999996	257.275	235.561	195.697	165.998	233.26	253.761
Acpl2	3132.62	0.395134	0.195637	2.01973	0.0434118	0.999996	4401.6	3085.51	3189.74	2496.12	2387.59	3235.18
Acrbp	22.0822	0.253696	0.716085	0.354282	0.723128	0.999996	13.9607	18.4352	39.8424	12.2962	13.3038	34.6546
Acsf3	159.621	0.38131	0.262664	1.4517	0.146585	0.999996	165.534	187.084	188.666	142.636	116.187	157.623
Acsl3	279.482	-0.152698	0.252322	-0.605172	0.545065	0.999996	213.399	282.674	298.818	239.775	362.75	279.473
Acsl4	767.983	0.0276159	0.18321	0.150733	0.880186	0.999996	703.019	714.195	909.345	818.925	698.893	763.52
Acsl5	2726.62	-0.0280814	0.141217	-0.198853	0.842378	0.999996	2941.71	2495.59	2663.58	2785.08	2723.73	2750.01
Acsl6	8.44296	1.45768	1.18814	1.22686	0.219874	0.999996	17.9494	4.09672	15.2339	0	4.4346	8.94313
Acsm3	73.4856	-0.187671	0.367319	-0.510922	0.609406	0.999996	87.7527	51.8918	66.7946	84.8436	73.6144	76.0166
Acss1	27.6065	1.33867	0.835759	1.60174	0.109212	0.999996	34.9016	53.9401	29.2959	33.1997	0.88692	13.4147
Acss2	361.373	0.113523	0.201368	0.563757	0.57292	0.999996	385.912	361.877	378.503	362.737	298.005	381.201
Acss3	463.601	0.0217342	0.296033	0.073418	0.941473	0.999996	408.848	479.316	513.264	591.446	542.795	245.936
Acta1	37.1028	0.814565	0.579246	1.40625	0.15965	0.999996	78.778	38.236	24.6086	36.8885	19.5122	24.5936
Acta2	74.102	-0.69655	0.45636	-1.52632	0.126931	0.999996	74.7892	67.5959	26.9522	73.777	127.717	73.7808
Actb	65246.1	0.609476	0.615467	0.990266	0.322044	0.999996	116363	87762.7	32353.2	81595	35308.3	38094.4
Actg1	27704	0.185085	0.252151	0.734025	0.462934	0.999996	43093.6	25352.5	19989.2	30981.4	21827.1	24980.4
Actg2	14.2486	-0.337438	0.897347	-0.37604	0.706887	0.999996	25.9269	2.73115	9.37469	12.2962	19.5122	15.6505
Actl6a	780.259	-0.205343	0.179696	-1.14273	0.253152	0.999996	844.62	649.33	680.837	892.702	824.836	789.231
Actn1	1292.88	0.0320277	0.527569	0.060708	0.951592	0.999996	876.53	1788.22	1256.21	2084.2	732.596	1019.52
Actn3	88.9452	0.39462	0.373166	1.05749	0.290287	0.999996	64.8173	122.902	114.84	86.0732	61.1975	83.8419
Actn4	5892.32	0.107437	0.18192	0.590573	0.554807	0.999996	4727.68	6459.84	7148.2	5173	6138.38	5706.84
Actr10	2358.69	-0.0928653	0.145927	-0.63638	0.524529	0.999996	2375.31	2220.42	2252.27	2689.17	2351.23	2263.73
Actr1a	3703.82	0.102744	0.223216	0.460287	0.64531	0.999996	3274.77	4229.86	4000.65	4914.78	2773.4	3029.49
Actr1b	1378.31	0.0218795	0.175587	0.124608	0.900834	0.999996	1361.16	1159.37	1647.6	1384.55	1366.74	1350.41
Actr2	2726.83	0.119128	0.221829	0.537026	0.59125	0.999996	2659.51	3361.36	2494.84	3529	2081.6	2234.66
Actr3	4860.86	-0.0863394	0.156433	-0.551926	0.580999	0.999996	5505.48	4121.98	4519.77	5099.22	5006.67	4912.01
Actr3b	168.031	-0.452056	0.3288	-1.37487	0.169172	0.999996	198.441	112.66	114.84	158.621	167.628	255.997
Actr5	230.056	0.278966	0.244778	1.13967	0.254424	0.999996	226.362	249.9	281.241	204.116	246.564	172.155
Actr6	343.305	-0.178515	0.257942	-0.692072	0.488892	0.999996	413.834	219.857	333.973	350.441	388.471	353.254
Actr8	722.162	-0.144463	0.183145	-0.788792	0.430234	0.999996	680.083	624.067	755.834	662.764	856.765	753.459
Acvr1	2759.51	-0.0714889	0.193829	-0.368825	0.712258	0.999996	2460.07	2804.2	2807.72	3612.62	2276.72	2595.74
Acvr1b	193.33	-0.0938475	0.336314	-0.279047	0.780209	0.999996	164.536	256.045	139.448	256.99	215.522	127.44
Acvr2a	2113.72	-0.115663	0.197531	-0.585542	0.558183	0.999996	1965.46	1590.89	2532.34	2478.91	2065.64	2049.09
Acvr2b	187.748	0.0280187	0.275336	0.101762	0.918946	0.999996	154.564	237.61	175.775	159.85	181.819	216.871
Acvrl1	1429.97	0.244253	0.171217	1.42657	0.153703	0.999996	1627.41	1465.26	1558.54	1514.89	1106.88	1306.81
Acy1	129.372	0.30713	0.376036	0.816759	0.414066	0.999996	203.427	104.466	121.871	73.777	116.187	156.505
Acy3	679.711	0.00216559	0.174736	0.0123935	0.990112	0.999996	714.985	683.469	642.166	607.431	672.286	757.93
Acyp1	111.108	0.0900603	0.375294	0.239973	0.810352	0.999996	159.55	110.611	73.8257	84.8436	142.794	95.0208
Acyp2	514.77	-0.0203149	0.213088	-0.095336	0.924048	0.999996	632.218	497.751	403.112	527.506	533.926	494.108
Ada	379.944	-0.159385	0.192442	-0.828224	0.407544	0.999996	398.876	330.469	348.035	392.248	400.888	409.148
Adal	220.636	-0.193158	0.255347	-0.756453	0.449378	0.999996	260.267	177.525	180.463	217.642	259.868	228.05
Adam10	2032.75	0.00799769	0.183088	0.0436822	0.965158	0.999996	1838.82	1752.71	2525.31	2155.52	2050.56	1873.59
Adam11	51.4552	-0.188084	0.480095	-0.391764	0.695233	0.999996	59.8314	49.1606	35.1551	72.5474	62.9713	29.0652
Adam15	1653.59	-0.0370957	0.170163	-0.218001	0.827428	0.999996	1827.85	1599.77	1469.48	1458.33	1686.92	1879.18
Adam17	1868.57	-0.146853	0.164968	-0.890192	0.373363	0.999996	1635.39	1695.36	1990.95	1766.96	1910.43	2212.31
Adam19	575.631	0.275235	0.327765	0.839732	0.401059	0.999996	316.109	715.56	858.956	698.423	409.757	454.982
Adam1a	5.63099	0.637198	1.38041	0.461602	0.644366	0.999996	8.97471	8.19344	3.51551	2.45923	10.643	0
Adam22	11.635	-0.305238	1.11118	-0.274697	0.783549	0.999996	20.941	10.2418	0	13.5258	19.5122	5.58946
Adam23	16.1794	0.423579	1.03991	0.407322	0.683771	0.999996	26.9241	18.4352	10.5465	3.68885	36.3637	1.11789
Adam28	109.579	0.20599	0.361469	0.569869	0.568767	0.999996	75.7864	130.412	146.479	76.2363	126.83	101.728
Adam4	7.38709	-0.154797	1.2087	-0.128069	0.898094	0.999996	3.98876	2.04836	15.2339	1.22962	10.643	11.1789
Adam5	143.023	0.289908	0.334779	0.86597	0.386507	0.999996	167.528	130.412	174.604	86.0732	116.187	183.334
Adam9	4336.3	-0.0308019	0.185306	-0.166221	0.867983	0.999996	4070.53	3403.01	5398.65	4463.51	4333.49	4348.6
Adamdec1	1030.47	-0.147123	0.229506	-0.641043	0.521495	0.999996	646.179	1181.22	1106.21	1034.11	1165.41	1049.7
Adamts1	4445.52	0.0520296	0.205839	0.252769	0.800447	0.999996	4148.31	3620.13	5809.96	4143.81	3790.7	5160.19
Adamts10	697.037	0.296062	0.199706	1.48249	0.138209	0.999996	626.235	807.737	871.846	586.528	717.519	572.36
Adamts12	118.932	0.473313	0.521466	0.907657	0.364059	0.999996	43.8764	161.138	209.759	146.324	105.544	46.9514
Adamts17	13.7608	-0.22168	0.938285	-0.236261	0.81323	0.999996	10.9691	6.14508	21.093	15.985	2.66076	25.7115
Adamts18	4.96309	0.252169	1.51169	0.166813	0.867518	0.999996	0	3.41393	12.8902	6.14809	6.20844	1.11789
Adamts2	21011.3	0.259746	0.201812	1.28707	0.19807	0.999996	17587.4	23640.8	27465.5	15466.1	19393.4	22514.3
Adamts4	1192.87	0.385351	0.221808	1.73732	0.0823316	0.999996	964.283	1343.72	1746.04	1146	992.464	964.74
Adamts5	1847.44	-0.411758	0.219233	-1.87817	0.0603579	0.999996	1602.48	1734.28	1417.92	2691.63	1474.06	2164.24
Adamts7	76.9794	-0.0188465	0.42135	-0.0447287	0.964324	0.999996	52.8511	109.929	65.6228	106.977	59.4237	67.0735
Adamts8	21.2514	-0.137738	0.711806	-0.193506	0.846563	0.999996	16.9522	30.7254	12.8902	8.60732	29.2684	29.0652
Adamts9	319.491	0.0111397	0.254177	0.0438265	0.965043	0.999996	407.851	300.426	253.117	347.982	255.433	352.136
Adamtsl1	125.106	-0.267645	0.308944	-0.866324	0.386313	0.999996	118.666	101.052	120.699	158.621	98.4482	153.151
Adamtsl3	1027.31	0.183507	0.559025	0.328262	0.742714	0.999996	483.637	1515.1	1278.47	1400.53	698.006	788.113
Adamtsl4	1103.23	0.27978	0.262212	1.067	0.285973	0.999996	725.954	1618.2	1284.33	1146	977.386	867.484
Adamtsl5	393.238	0.254538	0.197688	1.28758	0.197894	0.999996	425.8	417.865	440.61	304.945	377.828	392.38
Adap2	306.559	0.317443	0.391831	0.810152	0.417853	0.999996	234.34	342.076	445.298	186.902	479.824	150.915
Adar	723.879	0.256255	0.217185	1.17989	0.238044	0.999996	789.774	598.121	977.311	742.689	630.6	604.779
Adarb1	757.623	0.466808	0.249199	1.87323	0.0610363	0.999996	581.362	949.756	1106.21	743.919	632.374	532.116
Adat1	97.1091	-0.0268951	0.315996	-0.0851122	0.932172	0.999996	96.7274	89.445	103.122	82.3844	117.073	93.9029
Adat2	62.6264	0.194883	0.402609	0.48405	0.628351	0.999996	90.7443	54.6229	55.0763	66.3993	49.6675	59.2482
Adat3	71.1014	0.0909832	0.392833	0.231607	0.816843	0.999996	63.8201	76.4721	79.6848	88.5325	74.5013	43.5978
Adc	747.779	0.0488308	0.162865	0.299823	0.764312	0.999996	771.825	788.619	720.679	681.208	752.995	771.345
Adck1	280.79	0.295232	0.226388	1.3041	0.1922	0.999996	343.033	290.867	295.303	227.479	298.892	229.168
Adck2	926.231	0.147906	0.177508	0.833236	0.404712	0.999996	1030.1	964.777	926.922	727.934	955.213	952.443
Adck3	322.601	-0.0869493	0.223395	-0.389219	0.697114	0.999996	251.292	318.861	369.128	313.552	352.994	329.778
Adck4	406.863	-0.00220256	0.243664	-0.00903935	0.992788	0.999996	526.516	297.012	397.252	371.344	414.192	434.86
Adck5	299.81	0.356074	0.266236	1.33744	0.181079	0.999996	373.946	301.792	335.145	173.376	297.118	317.481
Adcy1	4.26176	-0.0634894	1.75045	-0.0362703	0.971067	0.999996	0	12.2902	0	6.14809	2.66076	4.47157
Adcy10	27.0053	0.425975	0.614826	0.692838	0.488411	0.999996	30.9129	23.8975	38.6706	12.2962	37.2507	19.0042
Adcy2	9782.45	0.269308	0.14093	1.91094	0.0560126	0.999996	10471.5	11271.4	10335.6	7934.72	9098.92	9582.56
Adcy3	2004.96	0.159897	0.194084	0.823855	0.410022	0.999996	1651.35	2208.13	2487.81	2090.35	1621.29	1970.84
Adcy4	696.843	0.0637664	0.162534	0.392326	0.694817	0.999996	682.078	688.932	766.381	679.978	687.363	676.324
Adcy5	13.5241	-0.0866607	0.893275	-0.0970146	0.922715	0.999996	4.98595	24.5803	9.37469	14.7554	6.20844	21.2399
Adcy6	409.777	-0.199947	0.310464	-0.644028	0.519557	0.999996	288.188	520.283	333.973	641.86	316.631	357.725
Adcy7	30.209	0.9505	0.528519	1.79842	0.07211	0.999996	46.8679	36.1877	36.3269	25.822	20.3992	15.6505
Adcy9	386.679	0.462944	0.320654	1.44375	0.14881	0.999996	354.002	641.819	346.863	473.403	236.808	267.176
Adcyap1r1	648.813	0.324846	0.361344	0.898993	0.368656	0.999996	450.73	684.835	1030.04	633.253	825.723	268.294
Add1	5216.8	0.190359	0.150953	1.26105	0.207291	0.999996	4932.1	5383.77	6366.58	4972.57	4942.81	4702.97
Add2	9.06647	-0.0377825	0.94321	-0.0400574	0.968047	0.999996	7.97752	11.6074	7.03102	15.985	6.20844	5.58946
Add3	901.386	0.12868	0.161016	0.799176	0.424188	0.999996	844.62	997.551	981.999	866.88	836.366	880.898
Adh1	2688.01	0.299758	0.204873	1.46314	0.143429	0.999996	3486.18	3120.33	2292.11	1918.2	2562.31	2748.89
Adh5	1740.18	-0.07629	0.1635	-0.466605	0.640782	0.999996	1950.5	1659.85	1471.83	1833.36	1829.72	1695.84
Adh7	236.196	-0.142065	0.26743	-0.531224	0.595264	0.999996	186.474	245.12	242.57	241.005	313.083	188.924
Adhfe1	53.009	0.955493	0.588358	1.624	0.104376	0.999996	66.8117	87.3967	56.2481	17.2146	73.6144	16.7684
Adi1	1136.39	0.0661431	0.177543	0.372546	0.709486	0.999996	1237.51	1258.38	990.201	1024.27	1049.23	1258.75
Adipoq	66519.8	0.221716	0.141913	1.56234	0.118208	0.999996	69545	72089.3	73230.4	53469.9	65271.1	65512.9
Adipor1	4074.32	0.0437526	0.134172	0.326094	0.744353	0.999996	3943.89	4206.65	4258.45	3851.16	4251.9	3933.86
Adipor2	1404.27	-0.253506	0.200654	-1.2634	0.206447	0.999996	1365.15	1506.91	969.108	1716.55	1363.2	1504.68
Adk	341.66	0.0326993	0.20961	0.156001	0.876032	0.999996	402.865	326.372	307.021	361.508	320.178	332.014
Adnp	672.749	0.441608	0.287203	1.53761	0.124143	0.999996	510.561	993.455	819.113	775.889	400.888	536.588
Adnp2	523.559	0.424388	0.247332	1.71587	0.0861862	0.999996	549.452	473.854	778.099	496.765	501.11	342.075
Ado	1096.32	0.0316655	0.237886	0.133112	0.894105	0.999996	1061.01	1367.62	894.111	1447.26	874.503	933.439
Adora1	8.27746	-1.96324	1.52746	-1.2853	0.198688	0.999996	0.99719	8.87623	0	0	27.4945	12.2968
Adora2b	4.72062	1.03719	1.67145	0.620535	0.534906	0.999996	0	9.55901	9.37469	4.91847	0	4.47157
Adpgk	1014.14	0.206509	0.207613	0.994679	0.319892	0.999996	874.535	1259.74	1123.79	1117.72	773.395	935.675
Adprh	2832.38	0.0228781	0.158163	0.144649	0.884988	0.999996	3239.87	2866.34	2457.34	2793.69	2684.71	2952.35
Adprhl2	649.552	-0.100045	0.173588	-0.576337	0.564388	0.999996	676.095	624.067	580.059	725.474	616.41	675.206
Adra1b	121.68	-0.332703	0.358879	-0.927063	0.353894	0.999996	153.567	83.3	86.7159	97.1398	142.794	166.566
Adra1d	4.78787	-0.411031	1.73337	-0.237129	0.812557	0.999996	0	7.51065	4.68734	14.7554	1.77384	0
Adra2a	335.092	0.324828	0.210499	1.54314	0.122798	0.999996	349.016	402.161	365.613	322.16	251.885	319.717
Adrb2	1924.25	0.0602332	0.23022	0.261633	0.793604	0.999996	2158.92	2087.28	1647.6	1246.83	2286.48	2118.4
Adrb3	257.597	0.0494116	0.287573	0.171823	0.863577	0.999996	293.174	173.428	321.083	200.428	284.701	272.765
Adrbk1	579.727	-0.134951	0.208372	-0.647643	0.517216	0.999996	425.8	587.879	644.51	560.706	611.088	648.377
Adrbk2	47.1151	0.755274	0.470957	1.6037	0.10878	0.999996	58.8342	68.9614	49.2171	33.1997	22.173	50.3051
Adrm1	2183.62	-0.0641434	0.171047	-0.375005	0.707657	0.999996	2447.1	2049.73	1908.92	1920.66	2345.02	2430.3
Adsl	868.833	-0.00911591	0.172812	-0.0527505	0.957931	0.999996	867.555	867.822	863.643	734.082	933.04	946.854
Adss	962.56	0.0252239	0.187495	0.134531	0.892983	0.999996	1137.79	972.971	801.536	1021.81	982.708	858.541
Adssl1	4.90821	-1.69012	1.92096	-0.879832	0.37895	0.999996	6.98033	0	0	13.5258	0	8.94313
Aebp1	1568.56	-0.0753656	0.546589	-0.137884	0.890332	0.999996	659.142	1959.6	1964	1128.79	1495.35	2204.48
Aebp2	484.621	-0.298419	0.203556	-1.46603	0.142641	0.999996	398.876	497.069	407.799	480.78	623.505	499.697
Aes	5167.84	0.187996	0.16615	1.13148	0.257853	0.999996	5037.8	6416.15	5056.47	4515.16	4503.78	5477.67
Afap1	1770.11	0.277928	0.213841	1.2997	0.193705	0.999996	1387.09	2167.16	2265.16	1864.1	1423.51	1513.62
Afap1l2	1420.62	0.39543	0.206238	1.91735	0.0551937	0.999996	1220.56	1684.43	1938.22	1037.8	1313.53	1329.17
Aff1	1116.46	-0.232481	0.206348	-1.12665	0.259892	0.999996	1076.96	863.042	1140.2	1450.95	940.136	1227.44
Aff2	102.09	0.634973	0.321844	1.97292	0.0485047	0.999996	147.584	95.5901	130.074	75.0067	86.0313	78.2524
Aff3	14.2549	0.887045	0.852377	1.04067	0.298028	0.999996	10.9691	26.6287	17.5775	19.6739	6.20844	4.47157
Aff4	933.199	0.0115822	0.241153	0.0480283	0.961694	0.999996	662.134	873.284	1276.13	1064.85	896.677	826.122
Afg3l1	1242.01	0.0395888	0.157237	0.251778	0.801212	0.999996	1163.72	1399.03	1212.85	1252.98	1163.64	1259.86
Afg3l2	803.516	-0.302072	0.178256	-1.6946	0.0901522	0.999996	696.038	638.405	826.144	833.681	862.087	964.74
Afmid	97.3021	-0.385778	0.367272	-1.05039	0.293541	0.999996	62.823	83.9828	106.637	79.9251	102.883	147.562
Aftph	503.635	0.07919	0.197305	0.401357	0.688157	0.999996	587.345	439.032	527.326	480.78	535.7	451.628
Aga	1378.64	-0.0470593	0.174125	-0.270262	0.786959	0.999996	1572.57	1340.31	1155.43	1278.8	1436.81	1487.91
Agap1	506.792	0.272186	0.231595	1.17527	0.239888	0.999996	471.671	691.663	498.03	555.787	383.15	440.449
Agap3	1208.92	0.159154	0.180901	0.879786	0.378975	0.999996	1036.08	1424.29	1365.19	1245.6	1072.29	1110.07
Agbl2	11.4004	1.35221	0.954626	1.41648	0.156636	0.999996	4.98595	21.8492	22.2649	3.68885	4.4346	11.1789
Agbl3	169.594	0.14493	0.28373	0.510802	0.60949	0.999996	144.593	221.906	167.573	134.028	186.253	163.212
Agbl5	1441.96	-0.0898023	0.166704	-0.538692	0.5901	0.999996	1608.47	1364.89	1217.54	1551.78	1513.97	1395.13
Ager	291.712	-0.164633	0.257872	-0.63843	0.523194	0.999996	285.196	312.716	227.336	227.479	377.828	319.717
Agfg1	1119.78	-0.0243768	0.165734	-0.147084	0.883066	0.999996	1137.79	1058.32	1135.51	1213.63	1205.32	968.094
Agfg2	146.363	0.0977475	0.331257	0.295081	0.767932	0.999996	93.7358	154.31	206.243	130.339	134.812	158.741
Aggf1	612.019	0.0590416	0.23545	0.250761	0.801999	0.999996	548.454	600.852	725.366	425.448	629.713	742.28
Agk	655.978	-0.00330515	0.202182	-0.0163474	0.986957	0.999996	634.213	632.943	699.586	507.832	698.893	762.402
Agl	352.594	-0.00724648	0.244283	-0.0296643	0.976335	0.999996	291.179	396.016	366.785	453.729	301.553	306.302
Agmo	1340.24	-0.0342521	0.149593	-0.228969	0.818893	0.999996	1372.13	1325.29	1276.13	1256.67	1451.89	1359.36
Agpat1	1023.44	0.363215	0.281899	1.28846	0.197586	0.999996	1255.46	1302.07	895.283	1336.59	572.064	779.17
Agpat2	822.656	-0.117918	0.173337	-0.680281	0.496327	0.999996	715.982	898.547	751.147	842.288	812.419	915.553
Agpat3	2832.52	0.269274	0.176681	1.52407	0.127491	0.999996	2567.76	3539.57	3179.19	2921.57	2308.65	2478.37
Agpat4	557.004	-0.206276	0.19315	-1.06796	0.28554	0.999996	579.367	449.956	523.811	521.358	635.922	631.609
Agpat5	2875.89	-0.165328	0.153075	-1.08005	0.280119	0.999996	2854.95	2397.26	2883.89	2799.84	3275.4	3044.02
Agpat6	2459.18	-0.0720003	0.154478	-0.466087	0.641153	0.999996	2544.83	2178.77	2470.23	2817.05	2400.01	2344.22
Agpat9	83.8518	-0.654588	0.358328	-1.82678	0.0677324	0.999996	53.8482	70.327	71.482	100.829	129.49	77.1345
Agphd1	298.151	-0.0676856	0.229177	-0.295342	0.767733	0.999996	244.312	283.356	346.863	274.205	340.577	299.595
Agps	1207.85	0.0845431	0.173171	0.488204	0.625405	0.999996	1346.21	1023.5	1361.67	1191.5	1192.91	1131.31
Agrn	928.055	0.35012	0.269917	1.29714	0.194583	0.999996	902.457	895.816	1321.83	1185.35	658.095	604.779
Agt	51976.1	0.290537	0.142646	2.03677	0.0416732	0.999996	57236.7	58142.7	56197.7	40554	50574.9	49150.3
Agtpbp1	298.74	-0.242103	0.262131	-0.923595	0.355697	0.999996	229.354	261.507	331.63	236.087	392.906	340.957
Agtr1a	130.936	0.420578	0.345168	1.21847	0.223044	0.999996	89.7471	178.207	181.635	95.9102	108.204	131.911
Agtrap	1846.73	0.0625951	0.142504	0.439252	0.660479	0.999996	1871.73	1875.61	1913.61	1668.59	1840.36	1910.48
Agxt2l2	309.195	0.115008	0.205816	0.558793	0.576303	0.999996	316.109	296.329	352.723	281.582	286.475	321.953
Ahctf1	360.684	0.165009	0.265713	0.621003	0.534598	0.999996	363.974	433.569	345.692	427.907	371.62	221.342
Ahcy	366.237	-0.118603	0.246818	-0.480528	0.630852	0.999996	323.089	344.124	386.706	453.729	424.835	264.94
Ahcyl1	8266.29	-0.0963788	0.150588	-0.640016	0.522162	0.999996	7572.66	7399.36	9000.87	8486.82	9299.36	7838.65
Ahcyl2	1221.66	0.0563527	0.215268	0.261779	0.793492	0.999996	1040.07	1270.67	1424.95	1544.4	980.047	1069.82
Ahdc1	197.458	0.0463722	0.863507	0.0537022	0.957172	0.999996	93.7358	320.227	187.494	399.626	67.4059	116.261
Ahi1	227.835	-0.180116	0.301302	-0.597792	0.549979	0.999996	137.612	239.658	263.663	199.198	226.165	300.713
Ahnak	3182.42	-0.0168113	0.228044	-0.0737196	0.941234	0.999996	2063.19	4010.69	3417.07	3257.26	3511.32	2834.97
Ahr	34.7994	-0.898016	0.570922	-1.57292	0.115736	0.999996	22.9354	10.9246	39.8424	46.7255	47.0068	41.362
Ahsa1	1710.8	0.00554948	0.157939	0.0351369	0.971971	0.999996	1825.85	1537.64	1780.02	1568.99	1679.83	1872.47
Ahsg	32.3345	0.753051	0.522064	1.44245	0.149176	0.999996	51.8539	30.0426	39.8424	29.5108	20.3992	22.3578
AI115009	15.5582	-0.35646	0.767863	-0.464224	0.642487	0.999996	13.9607	19.8008	7.03102	9.83694	24.8338	17.8863
AI182371	3.36727	-1.77041	1.69715	-1.04317	0.29687	0.999996	0.99719	3.41393	0	4.91847	9.75612	1.11789
AI197445	12.4541	-0.158938	1.29004	-0.123204	0.901945	0.999996	0	27.9943	7.03102	27.0516	11.53	1.11789
AI314180	893.101	0.144624	0.228254	0.633609	0.526336	0.999996	717.977	1158.69	935.125	1056.24	753.882	736.69
AI314976	542.827	-0.063923	0.24593	-0.259923	0.794923	0.999996	456.713	660.937	474.594	484.469	726.388	453.864
AI316807	781.165	0.00119713	0.180747	0.00662326	0.994715	0.999996	733.932	883.526	725.366	772.2	698.893	873.073
AI317395	8.48488	0.582681	1.00187	0.581592	0.560842	0.999996	4.98595	8.19344	17.5775	3.68885	9.75612	6.70735
AI413582	257.082	-0.181778	0.219675	-0.827484	0.407963	0.999996	263.258	238.293	221.477	247.153	300.666	271.648
AI429214	132.384	0.108575	0.346341	0.31349	0.753908	0.999996	143.595	124.267	145.308	77.4659	181.819	121.85
AI450353	11.4335	-0.0941455	0.863031	-0.109087	0.913133	0.999996	6.98033	14.3385	11.7184	18.4443	11.53	5.58946
AI462493	696.239	0.0931734	0.173098	0.538269	0.590391	0.999996	798.749	714.878	642.166	695.963	687.363	638.316
AI464131	1436.54	0.140593	0.233684	0.601636	0.547417	0.999996	1082.95	1517.15	1920.64	1313.23	1671.84	1113.42
AI480653	1221.54	0.0702782	0.217788	0.322691	0.746929	0.999996	1284.38	923.81	1546.82	1232.08	999.559	1342.59
AI506816	6.17949	0.132801	1.05644	0.125706	0.899965	0.999996	6.98033	5.46229	7.03102	4.91847	7.09536	5.58946
AI507597	3.69605	-1.11135	1.49445	-0.743655	0.457085	0.999996	1.99438	2.73115	2.34367	2.45923	11.53	1.11789
AI597468	2779.43	-0.0569648	0.184503	-0.308748	0.757513	0.999996	3129.18	2819.91	2222.97	3318.74	2614.64	2571.15
AI597479	346.241	-0.453291	0.242026	-1.8729	0.0610824	0.999996	299.157	314.765	262.491	309.864	376.941	514.23
AI607873	190.591	0.0313551	0.82524	0.0379952	0.969692	0.999996	97.7246	97.6385	383.19	99.599	333.482	131.911
AI646023	29.3274	0.221441	0.551754	0.40134	0.688169	0.999996	24.9297	36.8705	32.8114	34.4293	30.1553	16.7684
AI661453	6.98696	0.389478	1.10835	0.351404	0.725285	0.999996	6.98033	14.3385	2.34367	4.91847	8.8692	4.47157
AI662270	53.8389	-0.916235	0.573219	-1.5984	0.109953	0.999996	28.9185	34.8221	48.0453	136.488	43.4591	31.301
[truncated: 13,386 more rows]
